# Supplementary material for: Genetic diversity and population structure of ridge gourd (Luffa acutangula) accessions in a Thailand collection using SNP markers
Source: PubMed Central journal article supplement (PMC8319206; doi:10.1038/s41598-021-94802-4), 2021-07-28
Supplement: 41598_2021_94802_MOESM1_ESM.pdf [file 41598_2021_94802_MOESM1_ESM.pdf]

## **Supplementary Information**

### **Genetic diversity and population structure of ridge gourd (*Luffa acutangula*) accessions in a Thailand collection using SNP markers**

Grimar Abdiel Perez, Pumipat Tongyoo, Julapark Chunwongse, Hans de Jong, Anucha Wongpraneekul,  
Waraporn Sinsathapornpong, & Paweena Chuenwarin

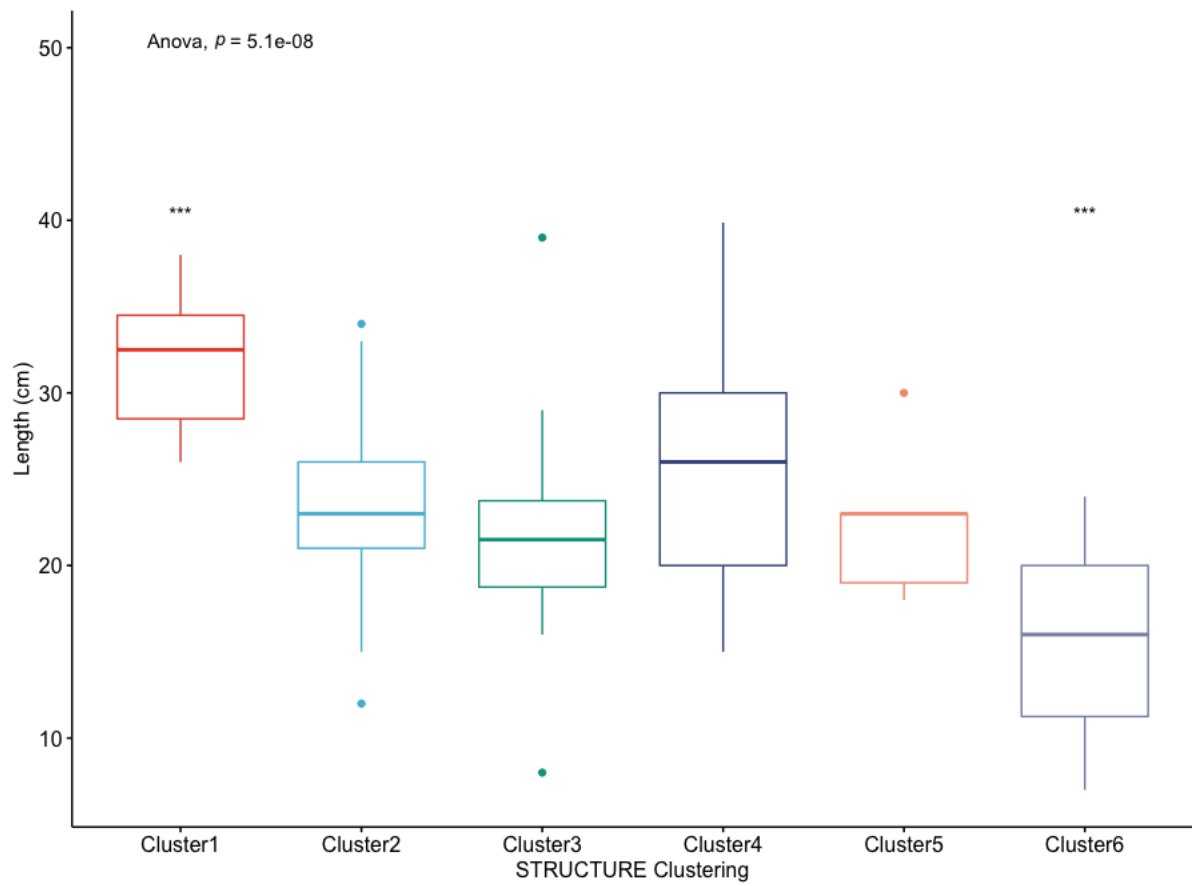

**Supplementary Figure S1.** Box plots of fruit length (cm) by STRUCTURE clustering.

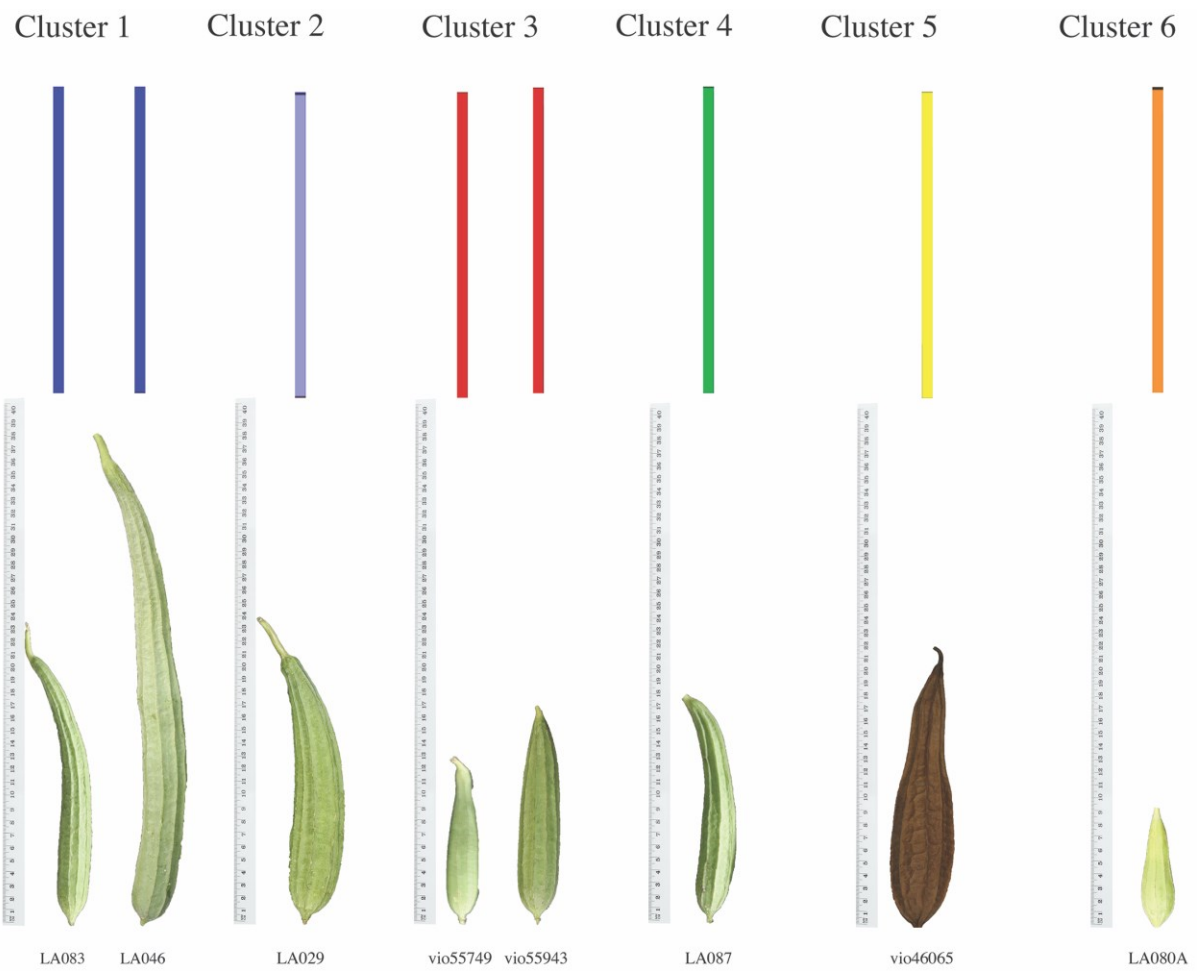

**Supplementary Figure S2.** Fruit shape of *Luffa acutangula* representatives based on STRUCTURE grouping.

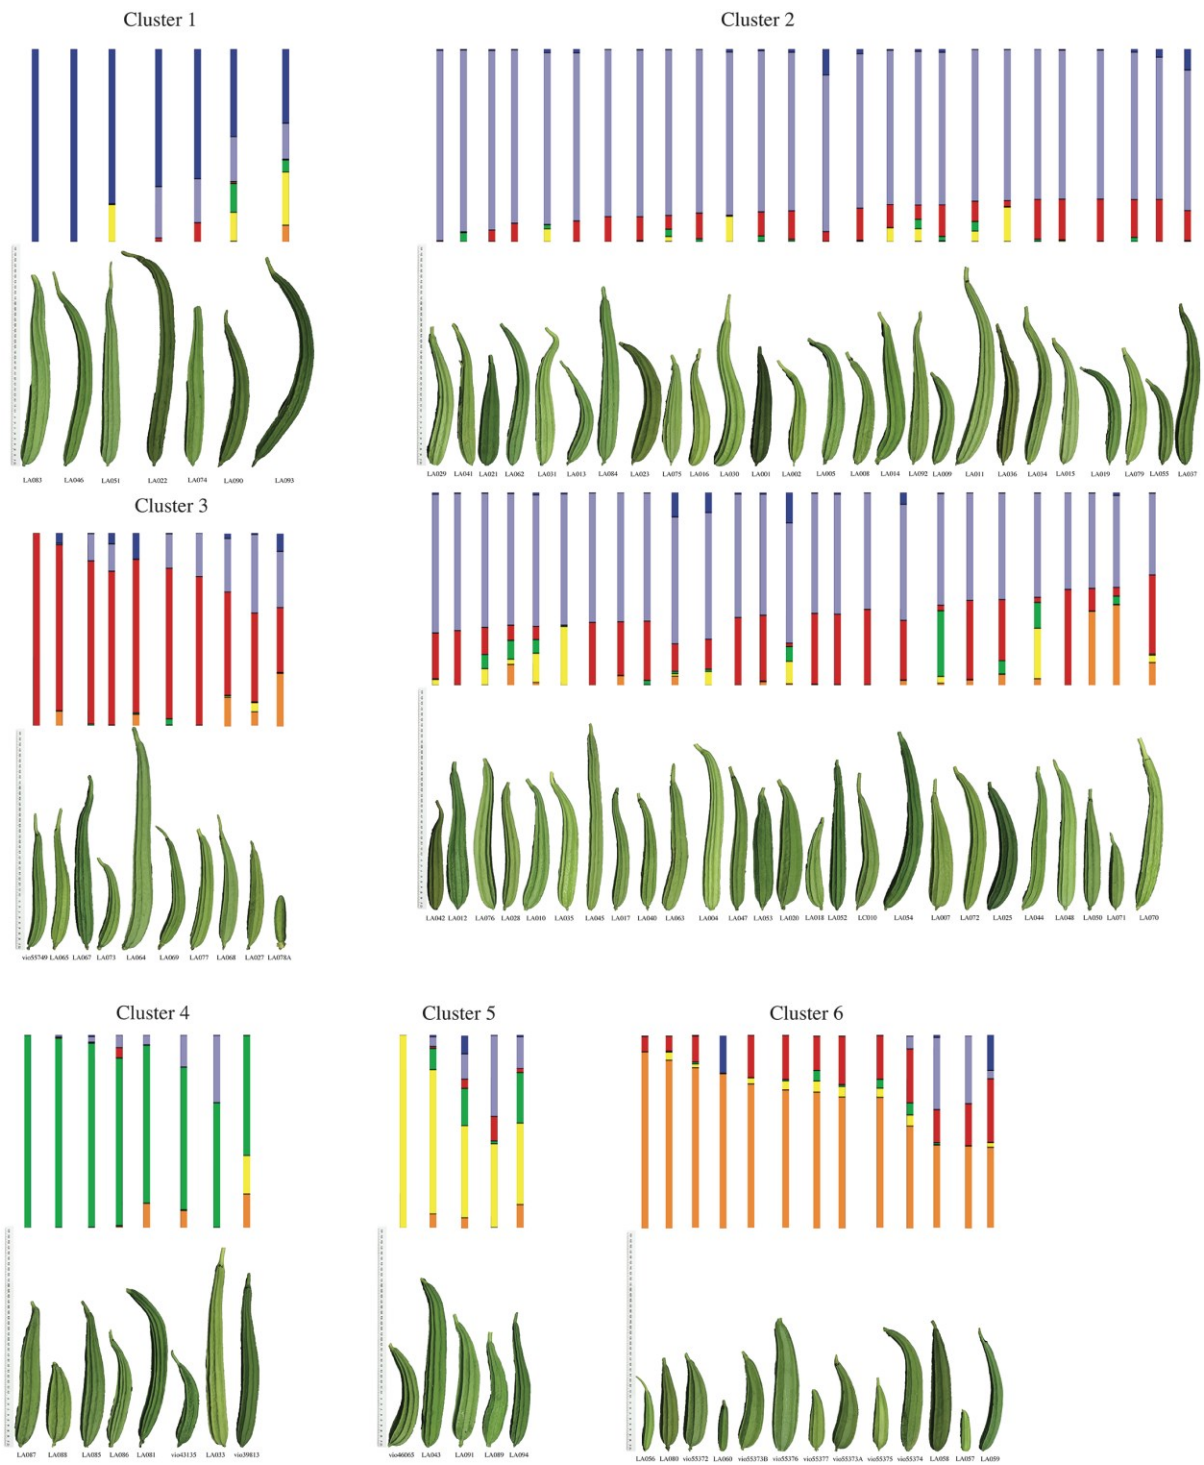

**Supplementary Figure S3.** Fruit shape of *Luffa acutangula* accessions based on STRUCTURE grouping.

**Supplementary Table S1.** Passport Data of *L. acutangula* accessions. TVRC Tropical Vegetable Research Center, AVRDC World Vegetable Center.

| <b>Accession number</b> | <b>Names</b> | <b>Country</b> | <b>Province/ State</b> | <b>Institute</b> |
|-------------------------|--------------|----------------|------------------------|------------------|
| 1                       | LA001        | Thailand       | Chaiyaphum             | TVRC             |
| 2                       | LA002        | Thailand       | Loei                   | TVRC             |
| 3                       | LA003        | Thailand       | Loei                   | TVRC             |
| 4                       | LA004        | Thailand       | Kalasin                | TVRC             |
| 5                       | LA005        | Thailand       | Loei                   | TVRC             |
| 6                       | LA006        | Thailand       | Phetchabun             | TVRC             |
| 7                       | LA007        | Thailand       | Pattani                | TVRC             |
| 8                       | LA008        | Thailand       | Narathiwat             | TVRC             |
| 9                       | LA009        | Thailand       | Ayutthaya              | TVRC             |
| 10                      | LA010        | Thailand       | Ayutthaya              | TVRC             |
| 11                      | LA011        | Thailand       | Lop Buri               | TVRC             |
| 12                      | LA012        | Thailand       | Sing Buri              | TVRC             |
| 13                      | LA013        | Thailand       | Sing Buri              | TVRC             |
| 14                      | LA014        | Thailand       | Chai Nat               | TVRC             |
| 15                      | LA015        | Thailand       | Chai Nat               | TVRC             |
| 16                      | LA016        | Thailand       | Chai Nat               | TVRC             |
| 17                      | LA017        | Thailand       | Uthai Thani            | TVRC             |
| 18                      | LA018        | Thailand       | Uthai Thani            | TVRC             |
| 19                      | LA019        | Thailand       | Chai Nat               | TVRC             |
| 20                      | LA020        | Thailand       | Suphan Buri            | TVRC             |
| 21                      | LA021        | Thailand       | Suphan Buri            | TVRC             |
| 22                      | LA022        | Thailand       | Suphan Buri            | TVRC             |
| 23                      | LA023        | Thailand       | Suphan Buri            | TVRC             |
| 24                      | LA024        | Thailand       | Suphan Buri            | TVRC             |
| 25                      | LA025        | Thailand       | Kanchanaburi           | TVRC             |
| 26                      | LA026        | Thailand       | Kanchanaburi           | TVRC             |
| 27                      | LA027        | Thailand       | Kanchanaburi           | TVRC             |
| 28                      | LA028        | Thailand       | Kanchanaburi           | TVRC             |
| 29                      | LA029        | Thailand       | Ratchaburi             | TVRC             |
| 30                      | LA030        | Thailand       | Ratchaburi             | TVRC             |
| 31                      | LA031        | Thailand       | Ratchaburi             | TVRC             |
| 32                      | LA032        | Thailand       | Petchaburi             | TVRC             |
| 33                      | LA033        | Thailand       | Prachuap Khiri Khan    | TVRC             |
| 34                      | LA034        | Thailand       | Chanthaburi            | TVRC             |
| 35                      | LA035        | Thailand       | Chanthaburi            | TVRC             |
| 36                      | LA036        | Thailand       | Chanthaburi            | TVRC             |

|    |       |          |                |      |
|----|-------|----------|----------------|------|
| 37 | LA037 | Thailand | Chanthaburi    | TVRC |
| 38 | LA038 | Thailand | Chanthaburi    | TVRC |
| 39 | LA039 | Thailand | Tak            | TVRC |
| 40 | LA040 | Thailand | Sukhothai      | TVRC |
| 41 | LA041 | Thailand | Nakhon Nayok   | TVRC |
| 42 | LA042 | Thailand | Prachin Buri   | TVRC |
| 43 | LA043 | Thailand | Chanthaburi    | TVRC |
| 44 | LA044 | Thailand | Chanthaburi    | TVRC |
| 45 | LA045 | Thailand | Chanthaburi    | TVRC |
| 46 | LA046 | Thailand | Nakhon Sawan   | TVRC |
| 47 | LA047 | Thailand | Kamphaeng Phet | TVRC |
| 48 | LA048 | Thailand | Kamphaeng Phet | TVRC |
| 49 | LA049 | Thailand | Kamphaeng Phet | TVRC |
| 50 | LA050 | Thailand | Phitsanulok    | TVRC |
| 51 | LA051 | Thailand | Phitsanulok    | TVRC |
| 52 | LA052 | Thailand | Phitsanulok    | TVRC |
| 53 | LA053 | Thailand | Phitsanulok    | TVRC |
| 54 | LA054 | Thailand | Phitsanulok    | TVRC |
| 55 | LA055 | Thailand | Uttaradit      | TVRC |
| 56 | LA056 | Thailand | Uttaradit      | TVRC |
| 57 | LA057 | Thailand | Uttaradit      | TVRC |
| 58 | LA058 | Thailand | Uttaradit      | TVRC |
| 59 | LA059 | Thailand | Uttaradit      | TVRC |
| 60 | LA060 | Thailand | Uttaradit      | TVRC |
| 61 | LA061 | Thailand | Uttaradit      | TVRC |
| 62 | LA062 | Thailand | Phrae          | TVRC |
| 63 | LA063 | Thailand | Chiang Rai     | TVRC |
| 64 | LA064 | Thailand | Chiang Rai     | TVRC |
| 65 | LA065 | Thailand | Chiang Rai     | TVRC |
| 66 | LA066 | Thailand | Chiang Rai     | TVRC |
| 67 | LA067 | Thailand | Chiang Mai     | TVRC |
| 68 | LA068 | Thailand | Chiang Mai     | TVRC |
| 69 | LA069 | Thailand | Chiang Mai     | TVRC |
| 70 | LA070 | Thailand | Lampang        | TVRC |
| 71 | LA071 | Thailand | Lampang        | TVRC |
| 72 | LA072 | Thailand | Lampang        | TVRC |
| 73 | LA073 | Thailand | Lampang        | TVRC |
| 74 | LA074 | Thailand | Nakhon Sawan   | TVRC |
| 75 | LA075 | Thailand | Phetchabun     | TVRC |
| 76 | LA076 | Thailand | Phetchabun     | TVRC |
| 77 | LA077 | Thailand | Phetchabun     | TVRC |
| 78 | LA078 | Thailand | Loei           | TVRC |

|     |           |                          |                  |                                      |
|-----|-----------|--------------------------|------------------|--------------------------------------|
| 79  | LA078-A   | Thailand                 | Loei             | TVRC                                 |
| 80  | LA079     | Thailand                 | -                | TVRC                                 |
| 81  | LA080     | Thailand                 | -                | TVRC                                 |
| 82  | LA080-A   | Thailand                 | -                | TVRC                                 |
| 83  | LA081     | Thailand                 | Narathiwat       | TVRC                                 |
| 84  | LA082     | Thailand                 | Patthalung       | TVRC                                 |
| 85  | LA083     | Thailand                 | Phichit          | TVRC                                 |
| 86  | LA084     | Thailand                 | Phichit          | TVRC                                 |
| 87  | LA085     | Vietnam                  | Ho Chi Minh City | TVRC                                 |
| 88  | LA086     | Vietnam                  | Ho Chi Minh City | TVRC                                 |
| 89  | LA087     | Vietnam                  | Tay Ninh         | TVRC                                 |
| 90  | LA088     | Vietnam                  | Lam Dong         | TVRC                                 |
| 91  | LA089     | Thailand                 |                  | TVRC                                 |
| 92  | LA090     | China                    |                  | TVRC                                 |
| 93  | LA091     | China                    |                  | TVRC                                 |
| 94  | LA092     | Thailand                 | Nonthaburi       | TVRC                                 |
| 95  | LA093     | Thailand                 | Kanchanaburi     | TVRC                                 |
| 96  | LA094     | China                    | -                | TVRC                                 |
| 97  | LA-CM     | Thailand                 | -                | East-West Seed International Limited |
| 98  | LC010     | Thailand                 | Loei             | TVRC                                 |
| 99  | VI039813  | Philippines              | La Union         | AVRDC                                |
| 100 | VI039833  | Philippines              | Nueva Ecija      | AVRDC                                |
| 101 | VI043135  | Indonesia                | -                | AVRDC                                |
| 102 | VI046065  | United States of America | -                | AVRDC                                |
| 103 | VI055372  | Bangladesh               | Chittagong       | AVRDC                                |
| 104 | VI055373A | Bangladesh               | Chittagong       | AVRDC                                |
| 105 | VI055373B | Bangladesh               | Chittagong       | AVRDC                                |
| 106 | VI055374  | Bangladesh               | Chittagong       | AVRDC                                |
| 107 | VI055375  | Bangladesh               | Cox's Bazar      | AVRDC                                |
| 108 | VI055376  | Bangladesh               | Kushtia          | AVRDC                                |
| 109 | VI055377  | Bangladesh               | Nawabganj        | AVRDC                                |
| 110 | VI055749  | Laos                     | Savannakhet      | AVRDC                                |
| 111 | VI055839  | Laos                     | -                | AVRDC                                |
| 112 | VI055943  | Laos                     | Saravane         | AVRDC                                |

**Supplementary Table S2.** Descriptive statistics of *Luffa acutangula* fruit length (cm).

| <b>STRUCTURE grouping</b> | <b>Count</b> | <b>Mean</b> | <b>Median</b> | <b>Max</b> | <b>Min</b> | <b>Standard Deviation</b> | <b>Variance</b> |
|---------------------------|--------------|-------------|---------------|------------|------------|---------------------------|-----------------|
| Cluster 1                 | 8            | 31.90       | 32.50         | 38.00      | 26.00      | 4.26                      | 18.10           |
| Cluster 2                 | 62           | 23.20       | 23.00         | 34.00      | 12.00      | 4.44                      | 19.70           |
| Cluster 3                 | 14           | 22.00       | 21.50         | 39.00      | 8.00       | 7.47                      | 55.80           |
| Cluster 4                 | 9            | 26.00       | 26.00         | 40.00      | 15.00      | 8.40                      | 70.50           |
| Cluster 5                 | 5            | 22.60       | 23.00         | 30.00      | 18.00      | 4.72                      | 22.30           |
| Cluster 6                 | 14           | 15.60       | 16.00         | 24.00      | 7.00       | 5.60                      | 31.30           |



**Supplementary Table S3.** One-way ANOVA based on STRUCTURE grouping. \*\*\*P-value < 0.001.

|                      | <b>Df</b> | <b>Sum sq</b> | <b>Mean Sq</b> | <b>F value</b> | <b>P-value</b> |
|----------------------|-----------|---------------|----------------|----------------|----------------|
| Structure clustering | 5         | 1483          | 296.52         | 10.27          | 5.1e-08***     |
| Residuals            | 104       | 3002          | 28.86          |                |                |

**Supplementary Table S4.** Tukey HSD based on STRUCTURE grouping with a 95% family-wise confidence level. *Diff* mean difference between two groups, *Lwr* lower endpoint of the interval, *Upr* upper endpoint of the interval, *P adj* p-value after adjustment for the multiple comparisons.

| Pairwise comparisons | Diff        | Lwr        | Upr        | P adj  |
|----------------------|-------------|------------|------------|--------|
| Cluster2–Cluster1    | –8.7137097  | –14.573774 | –2.853645  | 0.001  |
| Cluster3–Cluster1    | –9.875      | –16.994895 | –2.7551046 | 0.001  |
| Cluster4–Cluster1    | –5.875      | –13.454707 | 1.705      | 0.224  |
| Cluster5–Cluster1    | –9.275      | –18.167746 | –0.3822535 | 0.036  |
| Cluster6–Cluster1    | –16.2321429 | –23.14562  | –9.3186653 | <0.001 |
| Cluster3–Cluster2    | –1.1612903  | –6.08082   | 3.758      | 0.983  |
| Cluster4–Cluster2    | 2.839       | –2.725536  | 8.403      | 0.677  |
| Cluster5–Cluster2    | –0.5612903  | –7.813173  | 6.691      | 1.000  |
| Cluster6–Cluster2    | –7.5184332  | –12.134171 | –2.902695  | <0.001 |
| Cluster4–Cluster3    | 4.000       | –2.878472  | 10.878     | 0.542  |
| Cluster5–Cluster3    | 0.600       | –7.703153  | 8.903      | 1.000  |
| Cluster6–Cluster3    | –6.3571429  | –12.493721 | –0.2205648 | 0.038  |
| Cluster5–Cluster4    | –3.4        | –12.100656 | 5.301      | 0.866  |
| Cluster6–Cluster4    | –10.3571429 | –17.021724 | –3.6925615 | <0.001 |
| Cluster6–Cluster5    | –6.9571429  | –15.083988 | 1.170      | 0.138  |

**Supplementary Table S5.** Raw DArTseq SNP sequence data used to generate the marker data for 112 accessions.

| Organism name: <i>Luffa acutangula</i> (eudicots) |                                                                            |
|---------------------------------------------------|----------------------------------------------------------------------------|
| GenBank assembly accession: GCA_012295215.1       |                                                                            |
| AlleleID                                          | Sequence                                                                   |
| 39714580 F 0-32:G>A-32:G>A                        | TGCAGAGGCGGAGGGCTTTATGCGTCGTGTTGGCGAGATCTTAGTTCAG<br>GTTGATAAGGTGAGGCCTCT  |
| 39715258 F 0-35:T>C-35:T>C                        | TGCAGCAAAGGTTGGATTGAATCACCCTGAAGGGTGCTGAGGGTAATA<br>CAGAATTTTTGGTTTGCTTT   |
| 39715420 F 0-48:A>G-48:A>G                        | TGCAGCACACTGTCCCTCCCGCATTCCCTTCGATACTCCAAAGTGATGAA<br>AGAAAGTTCATGACTCTCT  |
| 39729507 F 0-48:G>A-48:G>A                        | TGCAGTATGAGAAGCATGCAATGTTATTATGAACAATAATGAAAAGCG<br>ACTAAAGATGTATTAC       |
| 39718538 F 0-7:A>G-7:A>G                          | TGCAGTTACAACAGGCTCTCATGTTGATGCAATTCCATTCTCTGGGAAGT<br>ATGATGGAGTTGTTGGGGT  |
| 39722527 F 0-59:T>C-59:T>C                        | TGCAGCATCCACGGCTTCACATCTTCCAGCCTCGCCGCCACGCCGCG<br>GAAGGCGAATCGGACGTTTC    |
| 39723188 F 0-16:T>C-16:T>C                        | TGCAGGACTTCGAGATTGATGAGCTTTCACAAGAGTATCTTGCCCTGCAT<br>CCAGTGGCTTCTACGAAGC  |
| 39715517 F 0-65:T>C-65:T>C                        | TGCAGCAGATCGAGAATCCTGTCATTCTTCTTCTCCATTGCCATAACCAA<br>TGCCTTCTTCACAACTTCA  |
| 39718010 F 0-43:A>T-43:A>T                        | TGCAGTCAACACCAAGGCATTTGTACAACCTCAAAGCCAAAATACGCCA<br>AGGAAATCTATCAGGTTTTTC |
| 39726404 F 0-26:C>T-26:C>T                        | TGCAGGATCCGAAAATACTGAACTTCTGGAGGGAGCTTTTGAATTTTCC<br>AGCTCGTTTTTTTGCTTTG   |

|                            |                                                                             |
|----------------------------|-----------------------------------------------------------------------------|
| 39728037 F 0-27:G>A-27:G>A | TGCAGCTTTCTCACCTGGAAGTGTAAGAATGTTATTACATTGATGACCC<br>TAATTTAC               |
| 46776489 F 0-19:T>G-19:T>G | TGCAGAAGTAATGTAACCTTTGTATCAATGGTTTAC                                        |
| 39716990 F 0-12:T>A-12:T>A | TGCAGGATGAGATGAAGCTTTTACAGATTGCCAAGGAAGTCGAAAGCGA<br>AATTGTCGGTATGACATAAC   |
| 39718036 F 0-68:G>C-68:G>C | TGCAGTCACTAAGTTTTGAGTAGATTGATAAATTCTGCACCAAATATCTT<br>GCTTTTCCTTGTCAAAGCG   |
| 39715910 F 0-40:A>C-40:A>C | TGCAGCCATTGCCGTCGCTGGTTTTGGTGGTGGCGATGGGAGGAAGAGG<br>AGGACGATTGGGATTTGGGA   |
| 39723455 F 0-49:C>T-49:C>T | TGCAGGGAGTATCAGTAAACCAAGGATCGATGGTTATCTCGAATATATA<br>CTGTATGTTGTTTCTGTATT   |
| 39728405 F 0-30:T>C-30:T>C | TGCAGTTC AATTT CAGGTAGCAAGGAAGCATGCCATACTTTTCAATTTG<br>CTATTCATAAAAATTTCTCC |
| 39715824 F 0-16:T>C-16:T>C | TGCAGCCAAGGCTGGATTATTGCCACCACCAGAGGATTTGCAGGTAAT<br>ATAGTACTCGGGGACATCAT    |
| 39724599 F 0-22:C>A-22:C>A | TGCAGAAAAGTGGATGATTGACGCATTAC                                               |
| 39714498 F 0-24:C>T-24:C>T | TGCAGAGCATCTCTGTCTTCTTGCCGAAGCCGAATGGGGTTTGTTCGAG<br>AATCGCGAAGGGATCGAGG    |
| 39719813 F 0-32:T>G-32:T>G | TGCAGATTTATCTCTGAAGTAAGTCTTTTAGCTAGAGTTGACTTATGGAT<br>CTTAC                 |
| 39720743 F 0-18:C>A-18:C>A | TGCAGTGCTTGCCCTCCACGACTTGCAACTTAC                                           |
| 39717990 F 0-60:T>A-60:T>A | TGCAGTATTTGGTTGGATCACTGGCCTTTGTTCTGCTTCCCATGTTGTTGG<br>AAATTTGCTTGACGGTT    |
| 39715904 F 0-39:T>A-39:T>A | TGCAGCCATGTAAATAGAATCTTATTGTAATTCCTAAAATGAAAAATAAT<br>AGGAACAAAGCAATAAGCG   |
| 39716267 F 0-64:T>A-64:T>A | TGCAGCTAGAAGAAGAGGGCTATTTATAGATAACGAGAGGCATTCAAAG<br>GACTAAAATACTCCTTGGGA   |
| 39717816 F 0-50:A>T-50:A>T | TGCAGTACAACCAAAGAGATACATGACTATTTCAATCAGCCAATTTGCT<br>ATTCTCTTCTCCATAAA      |
| 39721535 F 0-30:A>G-30:A>G | TGCAGAATTTCTATCCTCGGCTGTAGCTTCAAAGCCCACTGAGAACAAA<br>AGCTTTGGCTTTGACTTTGC   |
| 39720233 F 0-27:G>A-27:G>A | TGCAGCTTGAAAAGCCTATAACGGCGGGGCTTGTGCTGGTTAC                                 |
| 46753974 F 0-33:A>G-33:A>G | TGCAGAAGTCGCTTCTGTTGTAGTAGCAACTTCAACAGAGCAAGGCTCA<br>TTGTTTTCTTCACTCTCCGA   |
| 39720809 F 0-6:T>C-6:T>C   | TGCAGTTATCAACTAAATGCAGCTACCTACACTAACCATAGCATCAACTC<br>TATGCAATTAC           |
| 39714301 F 0-37:T>C-37:T>C | TGCAGACTGGGCATATTTGATTGCCATGTTTTACATTTGACACGACGCAG<br>TGAAAATGGAAGGAATGTG   |
| 39715521 F 0-21:A>G-21:A>G | TGCAGCAGATGCAATTCCTCGAAACACGTTATTGAAATCGCCCAATTTG<br>TGCTGATAGGTATTGGAGC    |
| 39716415 F 0-25:T>C-25:T>C | TGCAGCTGCAAGCACATATTCTTTTTCTCGCTCAAAAATCCACCTCCCC<br>ACTGAACCATTTCTCCTTT    |
| 39714868 F 0-43:T>C-43:T>C | TGCAGATCAGTCACCGTAGCCACAGCAACACCAACAGATACCATTACAA<br>GTGCTAGGACCTTGGCGACA   |
| 39724040 F 0-52:G>A-52:G>A | TGCAGTGACAACTAAGGAAAGAAAGTAAGAAAGGAGCACACTTGTAT<br>CTTTGGCAGATAGCTCAAAAT    |
| 39717341 F 0-25:T>C-25:T>C | TGCAGGGGATGTCGAAGCCAGTTTATTGCTGAATATCACCGCCCTGTG<br>CAGCTGAGAATAGACGGCC     |
| 39717518 F 0-16:T>A-16:T>A | TGCAGGTGAAGCTTGGTTGGATTCAATCAAGTAATGTCAAATCCAAACAT<br>GTACTGTGTTAGCTTACTG   |
| 39725117 F 0-28:A>G-28:A>G | TGCAGGCGGTTCCCTTTCCCAAAATGTCATTAC                                           |
| 39718075 F 0-67:C>T-67:C>T | TGCAGTCCAAATCCAAGTTGATAAGCTGCACTTCTTTCTACGAACCTTC<br>CCCATGTGTCCACCTGCT     |

|                            |                                                                            |
|----------------------------|----------------------------------------------------------------------------|
| 39722225 F 0-32:T>C-32:T>C | TGCAGCAAAACATTGGATGTTCCAACCTCAAATTTACATGCCTATGTCAA<br>GCCACCCTCACATGAAGGT  |
| 39723524 F 0-59:T>C-59:T>C | TGCAGGGTGGGTGATGGACCTATAGCAGGATCTTCAGCATATGCAGATA<br>GTGATATCGGTGCGTGTGGA  |
| 39724941 F 0-35:A>T-35:A>T | TGCAGCCAAACGGGCGAGAAGCTGATGGTATGCACTATTAC                                  |
| 39717502 F 0-12:C>T-12:C>T | TGCAGGTCCCCGTCATCAGACTCGCCACAGTTAGCAACAACAAGTGCT<br>GAATTAGGCCCGAGAATGTT   |
| 39726307 F 0-68:G>A-68:G>A | TGCAGCTGGTCTAGGATTTCTCAAGTAGGTTGTCCTGACTATTGAATCTT<br>GGGCTGCTTTCTTTTAGAG  |
| 39723642 F 0-62:C>T-62:C>T | TGCAGGTGTAAGTGCAGGATTGGTGGTCTGTTGGAGTAATTTCTTTTGAGA<br>TGCTTGTGGAGCACCCCC  |
| 39725502 F 0-55:A>C-55:A>C | TGCAGAAAAGTTAGCACCCACGGAATCTTTAGTCTAGTAGAAACAACTC<br>AAGATAAAACAGTCATTTAC  |
| 39724652 F 0-46:C>T-46:C>T | TGCAGAAGTCACTAAGAGATTCAAAGATTGCTGATAATATTTCAATCGA<br>TCAACTTAC             |
| 39720426 F 0-8:T>G-8:T>G   | TGCAGGCTTTTGATCTTGGAGGGATTTTGAAAGTGACACTCTTAC                              |
| 39722853 F 0-9:T>C-9:T>C   | TGCAGCTACTGGGAGCAGTTAGTTGTAGCGTGCCTATCGATGTACTATC<br>AACATTTTACATATAAGTT   |
| 39728556 F 0-25:C>G-25:C>G | TGCAGCACGGCGTCACCGGGGGCTTCCCGATGGTAACGTCGACGAGGCC<br>GCCGAGCAGCTTGGCGCAGA  |
| 39714405 F 0-51:A>G-51:A>G | TGCAGAGAGAAGAACAATGGAGACACCGTGCTACACCGCGCCCTCAGA<br>GACAACCACTTTGGTGAGCTT  |
| 39723643 F 0-42:A>G-42:A>G | TGCAGGTGTCTCTGATGTACAAACTGAAACTGCTACATGTCTAGATCCTG<br>ACCAGTTCACAAATTTTTT  |
| 39716903 F 0-12:T>C-12:T>C | TGCAGGAGCAATCCAATTTGGTGGGAGACTTACTTTTACTCCAATTTTAT<br>TTATATTTCTTTTGGTTTA  |
| 39717813 F 0-54:C>T-54:C>T | TGCAGTACAAACCTAAATTCGATGCGTTGCATGTAGAATTGAAGGAAGC<br>TGAAGCGAAATCCCTAAAGG  |
| 39713403 F 0-54:T>C-54:T>C | TGCAGAAAATCACAGATCACATTCTTGCAGCCTATGTAAGAAATAATA<br>ATAATTGTTTCGATCTTTCAG  |
| 39722434 F 0-52:C>T-52:C>T | TGCAGCAGCATTGTATTGGTAAACCCATTGACTAGATAATGAAATACA<br>ACACCATTAGGTGTGCACCT   |
| 39724838 F 0-42:C>T-42:C>T | TGCAGATTCAGCCCTAATACAATATCAGAACACCCCCACAATCGTTCTTC<br>CCAAATTAC            |
| 39727666 F 0-26:A>G-26:A>G | TGCAGGAACCAGGTATCTTATCGACAAATTCTGCTGTTGAAGTAAACTCC<br>GAAAATACACCACCAAAAG  |
| 39723197 F 0-44:C>T-44:C>T | TGCAGGAGAATCGCCGGTGCATCAACTGCAACAGCCTGGTACACCATTA<br>CTACCGTTCTCGCTGATATC  |
| 39718625 F 0-39:T>G-39:T>G | TGCAGTTCATCTACTCATAATGCGGATGCTTTTTCAGCTTTCACATGCTGCT<br>TTTAGGCTTCATTGTGTG |
| 39714155 F 0-11:G>T-11:G>T | TGCAGACAGAGGGATGTCCTCAACCTGCCCAAGGAACCAGTGTCAGAGG<br>AGCTTTTTTACAAGTGTGAG  |
| 39715669 F 0-42:C>G-42:C>G | TGCAGCATATATAAAAGACTTCCAAAAAAGGTTTCTTACACACTCTACTT<br>TTGGAAATGCTTTCATTGG  |
| 39718786 F 0-26:T>G-26:T>G | TGCAGTTGGCCTGTAGTCAGTATTTTTTTAGACAACCCAGCGGTTCAAAT<br>ATCAACCTTTACCAACT    |
| 39719954 F 0-6:A>C-6:A>C   | TGCAGCAGCCGCCCGCCGCGGATCATGGAGTAAAAATCCGTGTGATTA<br>C                      |
| 39717492 F 0-56:T>C-56:T>C | TGCAGGTCACTTATTTATCGGCTCAAAGAAGTTGATCTCAAAGCGATGA<br>AACACGATGAAAAGCTCGCG  |
| 39713563 F 0-15:A>G-15:A>G | TGCAGAAAGGTGGGGAGATGTGGTGGCTGTAAGAGAGGAGATGAAGAT<br>GAAAGGGATTGAAAACAAAGC  |
| 39713274 F 0-28:C>T-28:C>T | TGCAGCAATAAGATATAATAAGAACGAACAACAATGAATGAAATAAA<br>AATATAAATGAATAGCTGATA   |
| 39724339 F 0-51:C>T-51:C>T | TGCAGTTGCTCTAACTATAGAATCAGAATTGTGAGTAGACTTCATCGTCA<br>ACGAGTTCTTGGAAAGTGT  |

|                            |                                                                         |
|----------------------------|-------------------------------------------------------------------------|
| 39714965 F 0-10:A>C-10:A>C | TGCAGATGATACTTGCTGATGGGCACAAAATTCCAACAATCTCATTCTTCTTTCTCCCTTGGCAGCA     |
| 39721026 F 0-45:T>C-45:T>C | TGCAGTCATTTCAGCAGCATCTGGTTCATCCAAATCCAGAGATTTGTGAGAAGAAGTGACTGTACGTACC  |
| 39718286 F 0-17:G>T-17:G>T | TGCAGTGAGCTTTTGACGGGTGTTGTTCCATATACTGATCTTCGTAAGGACAGGTCAGATATGTT       |
| 39720444 F 0-33:C>T-33:C>T | TGCAGGGCAGATAAAAATAAACATAATGATTGAACCTTAC                                |
| 39717779 F 0-27:A>G-27:A>G | TGCAGTAAGTACCAACACATTCAGTCAATGTGGCTTATTATTTCTATCATTCATCTTTATTCTGTTGCT   |
| 39716801 F 0-56:C>A-56:C>A | TGCAGGAATACGTGGATCATTTCATCAACTCTCTACAAATTTTACGTACTAGGTGAACAGATTTTTTATG  |
| 39716273 F 0-13:G>A-13:G>A | TGCAGCTAGCACCGTAAGGCCACCACCTGAAAAGATAGGCGGCATTTTTCTGAAAAGCTTTTCATAGTGAG |
| 39720810 F 0-36:T>C-36:T>C | TGCAGTTATCATCTCCGCATGGTTTAGAGGCATTCGTGTTTCGATCTGATTGTCAGTTTAC           |
| 39716222 F 0-5:C>T-5:C>T   | TGCAGCGTTGTTTCTTCATATCAGTAGCTAATGATTCTCTCTTTTGTAGATCAAGTGTCACAATGTGAT   |
| 39716568 F 0-7:T>G-7:T>G   | TGCAGCTTCCGCCGGGCTTCCGATTTACCCACCGACGAGGAGTTAGTGTTTCACTATCTACAAGAA      |
| 39717344 F 0-9:A>T-9:A>T   | TGCAGGGGCAATAGATTGTGCATGTGCACTTCATATGCCCTCAACTAGCATATGAAGCAATATCAAGTGG  |
| 39728011 F 0-42:A>G-42:A>G | TGCAGCAGTTGGCCCAATATATGGACCTTTCACCAGCAAAAATATTCTTTAC                    |
| 39715790 F 0-34:T>C-34:T>C | TGCAGCATTGGATCTGTCTTCGAATAGATTTTATGGGCCGATCCCGGAGCGGATCAATGATCTTTACA    |
| 39719730 F 0-8:C>T-8:C>T   | TGCAGATCCCCCATGGGAGAATTAC                                               |
| 39721190 F 0-68:C>T-68:C>T | TGCAGAACTGTTCATTACATTATGGGACCCTGAGCAGAACATCCTCGTTGCTGTAATTGGAGAGACTCC   |
| 39719744 F 0-22:A>G-22:A>G | TGCAGATGAACTGCATGCACTGACTCTTGGGAGAAGCATTGTTAC                           |
| 39719458 F 0-46:T>A-46:T>A | TGCAGAATCGTACAGTGAATTTTCTCAACTGAATACCTAAAACCGTGAAGACGGTTAC              |
| 39729134 F 0-31:C>T-31:C>T | TGCAGAACTTGAAGAGGATCTACAGACGTTTCGGAATGAAAATAAAACAGCACGAGGACAACATTACAG   |
| 39715215 F 0-26:C>T-26:C>T | TGCAGATTTTTGTACACACCTGTCCCAAGTTGAGATTTATTATAACATGATGGAGGAGATTCTTCTG     |
| 39729371 F 0-10:G>C-10:G>C | TGCAGCTCAAGAAAGAGTTTTATTGCTTCTTCACTCGATCCCTCATTTGAGTAACCTGTCAATTAC      |
| 39717367 F 0-34:G>T-34:G>T | TGCAGGGTAAATCAGTTGAGGTTTCGACAAGCTGCGGGCCTGCTTCTGAAACAACCTTAGAACTGCAT    |
| 39718697 F 0-27:A>C-27:A>C | TGCAGTTCTTTTAGTCATAGTCATTCTAGCTCTTCTTTTTTCATCTCTGGTCTTCTTACCTGCTTGT     |
| 39716551 F 0-32:T>C-32:T>C | TGCAGCTTCAGTAACTCTAACATGAGCCTGAATGTCCTCATCTGATATTTCAACTTCAGTAATAGGAGC   |
| 39721409 F 0-53:C>G-53:C>G | TGCAGAAGGGCATTGGAATTATCCACTCCATGTGGATGAATGGTGAGGTCGACCCTAATGAGTTCACT    |
| 39718167 F 0-55:T>G-55:T>G | TGCAGTCTCCCAAAGGAGATGTAAGTTATTTGCAGAAGTTCTTTCTAATGTACGTTGGAGGTAGGCAAC   |
| 39717545 F 0-58:C>T-58:C>T | TGCAGGTGCTCGGAAATGCGAAGGCGGCGGTGGCCCGCGTCGTGTCGATCTGATTTTCAGGAATCCGG    |
| 39724156 F 0-51:G>A-51:G>A | TGCAGTGTCCAAAGGATGCACATCAAAGATGGCGAGTTTCGCTCTTCCCCTGCTGTGGTGTCTGCTA     |
| 39728142 F 0-65:T>C-65:T>C | TGCAGAACACCTCCCGTCTTTTGCTCTGCAAGATGACAGTATTGTTGAGATACAGGGGGAATCTGTTGC   |
| 39720147 F 0-15:C>A-15:C>A | TGCAGCTCAAAATAGCATCTTGATTAC                                             |

|                            |                                                                          |
|----------------------------|--------------------------------------------------------------------------|
| 39727768 F 0-33:A>G-33:A>G | TGCAGGTTACAGTGTACTCTTGC GAAGCTTTTTATCGCGCTTCTTCATCCG TCTATCCATCTCACTCTG  |
| 39721829 F 0-29:T>C-29:T>C | TGCAGAGCTTGCCAGTGTACAAATTCTTCTTGTGATCGCATTATTTATA ATTGGCCTTTTTTAC        |
| 39724096 F 0-12:A>C-12:A>C | TGCAGTGCTTCTAAAAAAGTTTGCTGGTGAAGAAGGAGAGAGGGTTGAC GTGCAAAAATTGTTTGGATA   |
| 39713430 F 0-19:A>T-19:A>T | TGCAGAAAAGATCCCACCACCTTCATCTTCCCGATTATCGTCCCAGTCA AAAACTCTTGATTCTCCAA    |
| 39716313 F 0-51:G>T-51:G>T | TGCAGCTCAATTGTTTCAGATTTTCGCACCAGATTCCCTTCGTTTCCACTCAC GGGTGACGAAAGAGATGA |
| 39713334 F 0-67:T>C-67:T>C | TGCAGCTACAGCAAGCTGTTTCCCTCACGATCTCAACCACCTTATCCACGG TCTCTGGTTTAGCCTGTTC  |
| 39725034 F 0-46:A>T-46:A>T | TGCAGCTTGAAAGGCTTCAAAGTCTTCCATCCACTGCATCCACAATACCT TTCTTAC               |
| 39717197 F 0-19:G>T-19:G>T | TGCAGGCTGCAACTCCTCCGCTTGTTTTTCATTTGAATTGTTGTATCTATTG TTTTCGTTTCGTGTCGATT |
| 39719686 F 0-26:G>A-26:G>A | TGCAGATACCAGAATTTGGGTTGTCAGGATATTTTTCTTACTACAGTAA GCTTAC                 |
| 39729378 F 0-25:A>C-25:A>C | TGCAGAATAAAATATGCAATAGATTATTATCTATACCAAACCTACAAGAA ATACTAGATGATTAC       |
| 39726956 F 0-5:A>C-5:A>C   | TGCAGAAGAAGAACGAACACAAAAACAACAAATTAC                                     |
| 39713969 F 0-38:T>C-38:T>C | TGCAGAATACCTAAAATTGAAATCGGAAGCAATTCAAGTAAGATCGAGT CGAATTGCTGCTGAGAAAAT   |
| 39725745 F 0-67:C>A-67:C>A | TGCAGAGCAGAACAGCATAGATATGCTCCAATCCATTGTCCAATGTGGT GGAGACGTAACACTGTGCGG   |
| 39718614 F 0-51:A>C-51:A>C | TGCAGTTACATGGGCTAGATGGTTATTTCTATTTCTACTTTGTCCCTAT ATGCTTGAATATAGTCAT     |
| 39713918 F 0-56:G>T-56:G>T | TGCAGAAGTACAATGAAAAAGAGGGTAAATATTATTACAATTACA AATTCTTTCAAGTACAATTTCAA    |
| 39717412 F 0-60:T>C-60:T>C | TGCAGGGTTTGCAGGGTTTGCACGTGCTGGGTCTGAATGTTCTTATAACT ACTAAATTGCTTGGATTTT   |
| 39722465 F 0-23:G>A-23:G>A | TGCAGCAGGCAACTCTGACATTGGTACAAGTTCAAATTCACAATTGGTTA CTTCTGGAACCTTGTCTCC   |
| 39720542 F 0-24:T>A-24:T>A | TGCAGGTTGGTCTCCTTAGTGCATTCATAATTAC                                       |
| 46757789 F 0-68:A>G-68:A>G | TGCAGTTTTACTAGACTGATATATATAAATTATTAGAAATATAATTATAA GTTATGTTGTGTTGTATCA   |
| 39719703 F 0-10:C>T-10:C>T | TGCAGATATGCGTATGCATCTTGTGTGATAAATATGTTTTCCAGGATTAC                       |
| 39714857 F 0-14:G>C-14:G>C | TGCAGATCAATGTCGGTCTTCAATAGTAGTATATTAGCCTTTCTCTGAT AATTCTGTCCAAGCAAACCT   |
| 39715423 F 0-12:G>T-12:G>T | TGCAGCACAGGCGGCCAAACAACCTCCTACCATCATGATAGCAACATGCA TAACTCAATAAACTAGTATT  |
| 39726341 F 0-24:C>T-24:C>T | TGCAGCTTTTCATGAAGAAGCAATCAGATTCAAATCATAATGCTTACTCT AAGATTTCCCACTCCAGAA   |
| 39719856 F 0-9:A>G-9:A>G   | TGCAGCAACAAACAGAAAAGAAAAGGCTTAC                                          |
| 39720903 F 0-18:G>A-18:G>A | TGCAGTTTGCAGTGAAAAGGAGAATGCCCATCAATTGCCAACTTTTTTAC                       |
| 39721507 F 0-47:C>T-47:C>T | TGCAGAATGGCTGTAGCCCATCACTGGGAAGATTGGATTTATGGAATCT ACAGGTGTAGAACCTCCAGG   |
| 39714510 F 0-14:T>G-14:T>G | TGCAGAGCCCCATTTCACTTATGAAAGTTATTGGATCACAATTCATGTTT ACAATGTCTGATTCTTTC    |
| 39716283 F 0-65:C>T-65:C>T | TGCAGCTATAGTTGATTGGAAATAATTATGCAAATATGTCGTGAAAATAT TATGTTTCGTTTCAATCTTC  |
| 39714416 F 0-59:C>T-59:C>T | TGCAGAGAGAGATGAGAAGCCCATGCAATCTCTTGCTTAGAGTTGTCTC AGAATCAATCCGTAGAATC    |

|                            |                                                                               |
|----------------------------|-------------------------------------------------------------------------------|
| 39727793 F 0-35:T>A-35:T>A | TGCAGTAGCTGGGTTTTCGAGGTCTCAGGGGAAGATTCCCCTCTGTTTCG<br>GGGCTACGGATCTCGTGTG     |
| 39718761 F 0-64:C>T-64:C>T | TGCAGTTGCTGAAATATGTTCTGATTTTGATCCCACAATGAATATCGAGC<br>CATCCCTTTTGAAGCTATT     |
| 39723184 F 0-66:A>G-66:A>G | TGCAGGACCTTCATCTCCTCAGGCTACCACCTTCTTGATTCCGACATAA<br>ATGCTACCTTTACCAAATT      |
| 39725053 F 0-6:G>A-6:G>A   | TGCAGGGAACCTGGTTTAGCCTCTTTAC                                                  |
| 39718143 F 0-15:C>G-15:C>G | TGCAGTCGTTCTTTTCTGGGTGGGTTCCCTATTTCTTTTGTATCTATGCCTG<br>CATAGCAGATTCTATGGC    |
| 39714364 F 0-5:A>G-5:A>G   | TGCAGAGAAGTTGCAAAGGATCTCAATGCAACCTGCGTTATTGGTAATC<br>AAGAGGATAAAAGAATTTGG     |
| 39713649 F 0-35:A>G-35:A>G | TGCAGAACAACATGTTGCCTAACAAAAATAGAACAAATGAATATGAATA<br>CACATACCTGCATATGCAGA     |
| 39716809 F 0-37:T>C-37:T>C | TGCAGGAATCATTCCATGCGTTTTTCTGATTGTTGGTTTGTGGTTCGTTCC<br>GGAGTCTCCTCGATGGCT     |
| 39718311 F 0-39:G>A-39:G>A | TGCAGTGATGCCGGGACAATAGACCATGTGACAGGATTCGAGCATGGTG<br>CATCTCTTCACTAAATGCAT     |
| 39726542 F 0-9:T>A-9:T>A   | TGCAGGTGGTCATGCCAAAACAGTAATGTTTGCACATGTAAGTCCAGAA<br>GAAGATTCTTTCAGTGAGAC     |
| 39716251 F 0-44:T>A-44:T>A | TGCAGCTACACCTCGGTCCCCAACATAGCAACCCTAGAAAATATTAGAG<br>TTGAATAAGTACTTCTCAGA     |
| 39716988 F 0-6:T>A-6:T>A   | TGCAGGTTGAAATCTAATAAATCACCATAACAAGCAAATTCTACTAGGAT<br>ATAAATCAAAAGGCATGCTC    |
| 39718947 F 0-16:A>G-16:A>G | TGCAGTTTTTCATTTCATACACTTGTAATAATGTTGTAGCAGGTTTCATCAGCT<br>GATCTCAGTTGTATTTGTA |
| 46769502 F 0-64:A>G-64:A>G | TGCAGGGAATTGTTCCAGACAGCTTGGGAGAAGTTGAAGATCTTCATCT<br>ATTGTAAGCGAGCTCATACC     |
| 39714973 F 0-58:T>C-58:T>C | TGCAGATGATGGCGGCGGAGGACAAGAAGAGGGTGGTGGTAGTAGGCG<br>GAGGAATTGGTGGCGCTTTTG     |
| 39724308 F 0-30:T>A-30:T>A | TGCAGTTGACATGAAAAGCAACCGCTATAATACAAGAAAATTGGCATT<br>TAAGTAACATCCACAGAAAA      |
| 39719865 F 0-9:G>T-9:G>T   | TGCAGCAACGGGTTCTTTTTCACTCTGATGCTTCTAGGGCTTAC                                  |
| 39714359 F 0-63:C>T-63:C>T | TGCAGAGAAGCCTGATGTGATGGAACTGAAACAAATGTTGGCGAGCCT<br>GAAAGGAGTGATTCCGATGA      |
| 39716200 F 0-39:C>T-39:C>T | TGCAGCGTATGCCATTGAAAGGGTAGCAGATCCTGCTCCCGCCTTTGCTT<br>CCACAACCTTCGGTTCCTCCG   |
| 39713741 F 0-37:C>T-37:C>T | TGCAGAACCTTGCAACGTGAACTTGTGAGAGATTTACGCGAGGTATTTCA<br>ATTAGTTATATCTTTCTCTT    |
| 39722858 F 0-26:A>T-26:A>T | TGCAGCTACGGCGGCAAGATCCTCCACGTTATCCCGACGGCAAACCTCC<br>GTTACCACGGTGGCGAAACC     |
| 39720106 F 0-23:T>C-23:T>C | TGCAGCGGGATTTGCAGGTCTGCTGAGAGGATTAC                                           |
| 39714631 F 0-32:C>T-32:C>T | TGCAGAGGTTTTGGTGGTATTGGAGGAATTCTCCGTTACCAGCTTGACAT<br>GAGGTCGTTTGATGAACTA     |
| 39718108 F 0-33:G>A-33:G>A | TGCAGTCCTACTCCAAGCGATTTTATGTCAGTTGCAATACTTGTGATGGT<br>TTTTGAAGATGAGCAAGAA     |
| 39718685 F 0-23:G>A-23:G>A | TGCAGTTCTGTTTTGTGCAACATGAATAACAACATTTGGGTTTGAACCTAG<br>GTACAGTTTCTCCATGACT    |
| 39724582 F 0-53:T>G-53:T>G | TGCAGAAACACCTGCTTGTGAAGTCCATCCATAGTTTCATGGATCTATT<br>TTTTATTAC                |
| 46755244 F 0-42:T>C-42:T>C | TGCAGCAGGCAAGATGCAGTTTTTTTGTCAAGACTTCAAATCTTTTTTTA<br>GGTACAGACAGAACATATG     |
| 39717314 F 0-58:C>A-58:C>A | TGCAGGGCGACTTTATGAAAATGCCGTTTGAAGATAATTCATTTGATGCA<br>ATATATGCCATTGAAGCCA     |
| 39724024 F 0-36:G>A-36:G>A | TGCAGTGAAGCCCATCAAGATGGAGCAGATCATAGGTTCTAGGATAT<br>GTTGAAAATGCCTCACACCT       |

|                            |                                                                            |
|----------------------------|----------------------------------------------------------------------------|
| 39718876 F 0-67:G>A-67:G>A | TGCAGTTTCGATTCAGAAAGACCTTCTACTTCATGTGTGGAGATGTTGG<br>ACAGGTTCTGAATATTACGC  |
| 39718709 F 0-54:G>A-54:G>A | TGCAGTTGAAGAGTGTTCCTTGGCCAAGCTCCATAAGCAGGTTGGAAG<br>CACTGCTTCTATCACCCAG    |
| 39713351 F 0-14:A>G-14:A>G | TGCAGGATGAGAGAATTGTTGCTTTTCAAGATATAAACCCCTCTGCTGTC<br>AGGTATTTGAAACCTCTAA  |
| 39714266 F 0-17:T>A-17:T>A | TGCAGACTAGCTTCTCCTAACCCAAGGACTTACATAGGATCTGGGAAAG<br>TTGCAGAAATCAAGAGTGCA  |
| 39717246 F 0-40:A>G-40:A>G | TGCAGGGAAATTATTATCCAATGCCTTCTTTAGCATTACATAAAGGATCC<br>AATGGTCAAAGGTTCTCTG  |
| 39717992 F 0-27:A>G-27:A>G | TGCAGTATTTTGAAGGGTATGGTTATCATGGAACATCATTTGAGCAAAG<br>ATATCAATGCTTCTCTGCAT  |
| 39727037 F 0-30:G>A-30:G>A | TGCAGATGTCCTGACAATTGCTGTAAGTCAGTGAATAGTAGTACCTATTT<br>TGTTAC               |
| 46757663 F 0-34:T>C-34:T>C | TGCAGTTGGGGAGGAGAAAGAGTATACAAACCCCTAAGTATACTTGCTT<br>GACCATGTCTCGTAGCTAC   |
| 39723839 F 0-50:C>T-50:C>T | TGCAGTAGTCCTATTTTCCTTTTGTTCCTTTTACTAATTATTCCTTTTGACG<br>CGTGAAACAGGTCCAG   |
| 39725634 F 0-18:G>A-18:G>A | TGCAGAATTCGTCATAAGGACCCTAGATAGCTTCACGCAACCAAGCATC<br>CAAATTAGTTAGCCTGTCTC  |
| 39714169 F 0-5:T>A-5:T>A   | TGCAGTCATATACTAAGGATGGGGGCCTGGGGCTAGCCGATCATCAACA<br>CTCCTCAAGATGGGGTTAGA  |
| 39716107 F 0-21:G>T-21:G>T | TGCAGCGACACCAAGAAACAAGGTTGGGATGTGTTATAAAGAGTTCAGAT<br>ATTTGATTTATAGTGTTTGT |
| 46762664 F 0-38:A>T-38:A>T | TGCAGAATTGGACGTGGAAGCGAATCGAGCCGAATAGAAGACATCCTAT<br>TCTTTATGAGCACATCCATG  |
| 39717735 F 0-38:A>G-38:A>G | TGCAGTAAACAAACGGTCAGATTTTCTTCTTATTTACATAAAGAGTAATT<br>TCAATTAGAGCTTGTCCGT  |
| 39719415 F 0-15:A>G-15:A>G | TGCAGAAGGAGGTGAACATACTGGTGTTAC                                             |
| 39714355 F 0-47:G>A-47:G>A | TGCAGAGAAGAAACGGTATGAAGGACACAGGACAATCTAACCAAAGG<br>AATTTTCATCAAACATGGATGT  |
| 39714794 F 0-56:T>C-56:T>C | TGCAGATAGGTTGTGGCATAGCATATTTGGGGGGTTCGAATTGTAGTATT<br>CTATACTACCTTTTAGGTT  |
| 39725050 F 0-6:A>C-6:A>C   | TGCAGGAAAGTAAGGAATTCGATGCCTTGAAAGTCTTTTAC                                  |
| 39720450 F 0-30:T>C-30:T>C | TGCAGGGGAATCTGGAGCCCTGACATCAAATCTTCCACTATTAC                               |
| 39719472 F 0-29:G>A-29:G>A | TGCAGAATGTTTGGAGCAAATTGATATGATGATTATGTCTTCGAAATTGAA<br>ATTCTTAC            |
| 39726075 F 0-67:G>A-67:G>A | TGCAGCATACTGTGTAGTTGCAACTGAATCAGCTGGAAGACAAGTGCCT<br>ATTGCATTTTGGAGCGTGT   |
| 39716732 F 0-9:T>G-9:T>G   | TGCAGGAAATGTTGTAAACCTTCCAACACTTGAGATTTGGAGCACATTCT<br>GCATCAATCAAATCTAA    |
| 39717313 F 0-51:G>T-51:G>T | TGCAGGGCCTTTCCATTTCCTAATGGGAAATTCTCTGTAGAACAAAGAACT<br>CGCACCACATCAGCCATGA |
| 39722735 F 0-8:G>T-8:G>T   | TGCAGCCTGATTGATCACTTGGCCAAATAAAGTGGGTCCACCCAATGAA<br>ACATTGTGAAGAGCATTTC   |
| 46764988 F 0-40:A>G-40:A>G | TGCAGTCATATACAGCAAAGCTATCGGACTTCGGTTTGGCAAATTTGGG<br>TCCTTCAGAAAGTAAATCTC  |
| 39717846 F 0-38:C>T-38:C>T | TGCAGTACGTCTGGTGCTTGATTTGCAACGTATCCCCGCAGCTCCGGTTC<br>GACTCTCTCAAATCAAAAA  |
| 39721036 F 0-57:C>T-57:C>T | TGCAGCTGCACCGCTACTCGTATTCCTTGGCGTAACTGGAATATCCTACT<br>TATCATTTCCGTTGAGTAA  |
| 39721711 F 0-66:G>A-66:G>A | TGCAGAGAAGCCTGAATGCACTATGGTACCAAAGAGCTTGTACTCTGGA<br>CGTGGATCCTGCATCATGAT  |
| 39717891 F 0-46:T>A-46:T>A | TGCAGTAGCATCTGATAATAAAGTTACGACGGGCAAAAATGAACCTTCT<br>CGAAGAGTTGAGGAGGATGT  |



|                            |                                                                         |
|----------------------------|-------------------------------------------------------------------------|
| 39718091 F 0-15:A>G-15:A>G | TGCAGTCCATGCAGCATGGAGATCCATCTGGAATTGGTTACGTTTATGCTTTCACTATATTTGCAGGAG   |
| 39729451 F 0-47:G>T-47:G>T | TGCAGGTCATCAAACCAAAGTGCCAAACCTTTTATCTTATGTTAGGCGAAACATGAAATTTAC         |
| 46755107 F 0-20:C>T-20:C>T | TGCAGCACAATGTTTTTGTCTCTTACCACGTGAATTTATTACTATAACCAGGTTATTGCGCAAATG      |
| 39721413 F 0-39:C>T-39:C>T | TGCAGAAGGTGAAGCCACTGTTACAACAGGCAATGAACGCGCTTGCTCGAGAATGGTTTGATCAACGTA   |
| 39721279 F 0-29:C>A-29:C>A | TGCAGAACCATCTCTATATGATAAAAGAGCAGGATGCTTCTTGCAGCAGATATGGAGGTAGTACTAAA    |
| 39715519 F 0-13:A>G-13:A>G | TGCAGCAGATGACAGCGCGGCAGAGTCATTCCCGCGTTTATAGCGACGAATCCGCCAGATCTTTCGA     |
| 39714023 F 0-42:A>T-42:A>T | TGCAGAATCTGTTGAGAACTATGGATTAGAATCAATAGCCAGTTTCTGAACCTGTAAACATCACCCC     |
| 39727921 F 0-66:T>G-66:T>G | TGCAGTTTGTCAATCTTGATTTGCTTGAAGTCAAGGTACTACAAATTACAATTTTTCCGTTGGTTTTG    |
| 39720654 F 0-11:T>G-11:T>G | TGCAGTCACCTTGGATGTGCAAATTC AATGAAAAATTAGGCACTCAAGTTAC                   |
| 39717465 F 0-33:A>C-33:A>C | TGCAGGTATAAAGCCGTTTCACTCTACTCTAGTACATATTTTTTCAGAAGCGATAGCTTTTAC         |
| 39718864 F 0-27:C>A-27:C>A | TGCAGTTTCAGTACTGAATTGATAAGCCGCCATATTTTCTCACCTGATAAATTACCTGATCCACCTCCA   |
| 39725398 F 0-26:T>C-26:T>C | TGCAGTTGTTCTCTTTCTGATATGAGTTTTTCTTCTCCTGGACTGTAGTTCTTAC                 |
| 39728782 F 0-37:A>G-37:A>G | TGCAGTGAGTTTTCTCATAAATTTCTTTTTCTTCATACATGTATTTTTCA TAAAACCTTAC          |
| 39717571 F 0-41:A>G-41:A>G | TGCAGGTGGTTTGCAACCTGACGCAGAGTCAAACATGGTTCATTTCATCATCTTCAGTATAAGTTTTGGG  |
| 39727078 F 0-15:G>C-15:G>C | TGCAGCAGTTGTACAGAATGCCTGTCCCCTGAAAGAAAAATTATTAC                         |
| 39726169 F 0-27:G>T-27:G>T | TGCAGCCTCTGCAAGCACTCCTCCTAGGAAAGAACCAACATGTGCTGTGATTTTGAGATACAGATTCTA   |
| 46757397 F 0-63:C>T-63:C>T | TGCAGTGGTGGTTGGCTAAAACACGATCGAAAATTGTATTCCTTATTAC TTTATTTGTAGGCCGCTT    |
| 39714277 F 0-55:T>C-55:T>C | TGCAGACTCATGAGCTTTTATTTGGCTGGTTGTTTTGTCATTGGATTTTTG TGAATTGAGGGAAGATAG  |
| 39717884 F 0-6:A>G-6:A>G   | TGCAGTAGCAATCAGAGCTCGTATGTTCTCCTGTCTGTCAATGAATCCCA TTTCTTGCAGCTGTGTGAG  |
| 46760880 F 0-21:T>C-21:T>C | TGCAGCCTCTGCTGCATTGGCTGTATTAC                                           |
| 39725626 F 0-50:A>C-50:A>C | TGCAGAATGCACCAGTTGTTTTTGGTCATCAGGTA CTATTTGATTTTGAAATTTATAGTGTA AATATTA |
| 46769166 F 0-41:C>T-41:C>T | TGCAGCGTCTCCGTCCAACGCCCAATGGCGCCTCTGGCCTCGAAGACGATCGGAAGGAATCCTTTG      |
| 39721789 F 0-50:A>T-50:A>T | TGCAGAGCAGAGTGTGAAACAGAAGGCTGCTAGAAACAGAGGGAGACAGAAAACACAGAGTAATTGTCT   |
| 39715300 F 0-65:G>A-65:G>A | TGCAGCAACCTCTCAGCTACATCTATGAGCCACTTCAGAGCTCTAGGTAGAAGCTTCTTAGGGGAGCCT   |
| 39727144 F 0-30:C>A-30:C>A | TGCAGGAGCAGACTTCTCTAAATTTTCTTGCCTGCGACTTAC                              |
| 39726188 F 0-20:G>C-20:G>C | TGCAGCGACTGTTGAAGCACGGTCGACCATTTTGTGCGATCATCTTTCATGGTTCTGCAACCTTGAGC    |
| 39722461 F 0-57:T>G-57:T>G | TGCAGCAGGAAGCAGTTTTTCTTGGTATGATGATGTCATGTGAATTATTGGTTTATATTTTCAGAACTT   |
| 39723617 F 0-31:A>C-31:A>C | TGCAGGTGAGATGTTATTTGAATAACTCACAACAAATCTATAATTAGGATATAAATTATTGATGTGTT    |
| 39714855 F 0-13:C>T-13:C>T | TGCAGATCAATAACCATATTCTACTTCTTGCCTATTCTTTTCTTTCACAAACATGATGAATCTCATATT   |

|                            |                                                                        |
|----------------------------|------------------------------------------------------------------------|
| 39726270 F 0-56:A>G-56:A>G | TGCAGCTCGCTTTGATGGCCATGTAGATGAATGTATCATGGGATTGGTTCGAGGCAAATTAC         |
| 46753808 F 0-49:C>T-49:C>T | TGCAGAACCTGGAGTAGGTGGTGTCCCAATCGCTTTCTTGAATCACACCTGCCTTTTATGGCAAAC     |
| 39720693 F 0-9:C>T-9:C>T   | TGCAGTCTCCCGGAAGTTTGAAATTACAGGCAGCCGAGATCTTAC                          |
| 39717181 F 0-40:A>G-40:A>G | TGCAGGCTAATGTTTCGAGAAAGTTTGTGGCGTTCATTGGAAGAGGACATGATTCCATCGTTATCCTCTG |
| 39719301 F 0-26:G>C-26:G>C | TGCAGAAAGAAAAGGAAGTTGAAGCTGTGTGTATGTCATGGAATAAAGAAATGCTGGTTAC          |
| 39715970 F 0-18:C>T-18:C>T | TGCAGCCGACTCGAAAACCGATCGGATCATGCTTCTCACTCTCGAATGGATATCCAACCACTTAC      |
| 39720917 F 0-16:T>C-16:T>C | TGCAGTTTTGGTGAAATCCTGTTGTTAC                                           |
| 46769166 F 0-20:G>A-20:G>A | TGCAGCGTCTCCGTCCAAACGCCGCAATGGCGCCTCTGGCCTCGAAGACGATCGGAAGGAATCCTTTG   |
| 39715499 F 0-8:G>A-8:G>A   | TGCAGCAGGGAAGATAGAAACCAAATCAGCCACCACCACATTACATCTCAAACGCCAAGCTTGAGGTCC  |
| 46756254 F 0-17:A>G-17:A>G | TGCAGGAGGGAAGAGGGAGCCGAGGAAATCGGGAAATCGCTGAAATAATGGAATCTCTGGAGCCTGAAA  |
| 39724610 F 0-5:C>A-5:C>A   | TGCAGCAATGGAGTTCCAGTTATCAACTTGGAGAATCTTAC                              |
| 46774172 F 0-20:G>A-20:G>A | TGCAGGCAATTTCTCTTTACGGTTTAC                                            |
| 39728910 F 0-10:G>A-10:G>A | TGCAGGGGTAGTGCTAGTAGTGAATCAGATTTACTTTTTTAC                             |
| 39713785 F 0-41:A>T-41:A>T | TGCAGAAGACAGCTACATGGAACCTGTTTCATCAGAAGCACGACCAAAATCTTTATAACATTCTGAAG   |
| 39714305 F 0-25:A>T-25:A>T | TGCAGACTTATCTAGAAAGAGGAATATATGGAGGTCAGAACAATAATTTATGTTGTGTAGTTCTCTT    |
| 39717804 F 0-46:A>G-46:A>G | TGCAGTAATTGCAACTCGTGCCTTTTGGCTATAACAGATTCACGCAACTTGAAATACCATTCCACGCA   |
| 39725161 F 0-14:A>G-14:A>G | TGCAGTACTTATCAATCGCCTTTCTTTAC                                          |
| 46755456 F 0-24:C>T-24:C>T | TGCAGCCAGTAAAGTTTCTCGACCCCGTTGGATATTGACTTGAATGTTCTGACGAAAGGATTCTTGA    |
| 39723620 F 0-34:T>G-34:T>G | TGCAGGTGATGTAAGCACGACTCCTGATATGCAATAACTGATACTAGGGTCAAGCACCCGCTGAGCAAG  |
| 39724693 F 0-32:G>A-32:G>A | TGCAGACACACGATTTCGAGGATTCAGAACCCTGAAGGAGTGGCTCGGTTTGCTTAC              |
| 39715295 F 0-50:G>A-50:G>A | TGCAGCAACCAGCCAGTCTCAGGGTGCTTTTCTTGTAGATATTTCTCTCGTTATCACTGCATTCACAT   |
| 39723417 F 0-32:A>G-32:A>G | TGCAGGCTTGGGCGGAGAATTTTCAGATCCGCCACTGTCATCAGAGATCAATTTCCCGATCACGATCAAA |
| 39714756 F 0-48:G>A-48:G>A | TGCAGATAATGATGATGGTGCTTTTGTATTTCGAGATTTGGCGAGTCGATGAGGATCAAACCATGGA    |
| 46765518 F 0-52:A>T-52:A>T | TGCAGTTTGAGCACTTTGACATCGTTGTACCCAAGAATGCAAAGAATTTTGAAGCCAATCTGAATTTAT  |
| 39726063 F 0-29:T>C-29:T>C | TGCAGCAGCTGCTGAAAACCACTTCCACTTTCCCGTCTCCAGTGAAGATAGGAGTACTGAAATCAAA    |
| 39718358 F 0-55:T>G-55:T>G | TGCAGTGCCTTTTGCATACTGGCAAGCAAATTTGAATGGCTTCTGTAAGTTATATTCTTTTTTGCAGAA  |
| 39717501 F 0-29:A>G-29:A>G | TGCAGGTCCAGTTATTTCCCAGCAGAGACTTCATTATTGGCTTCAAAGTATTACAATCAAGGATTTG    |
| 39720269 F 0-17:A>T-17:A>T | TGCAGGAAACAGCATCAATAGAGGTTGATAAAATTATGTTAC                             |
| 39713328 F 0-48:T>C-48:T>C | TGCAGCAGTAGCTGAAGAAACAAAATTGCCTTTTGTGACAGCAGAAAATAAGTTTGAAGCCTTGGTTAG  |

|                            |                                                                             |
|----------------------------|-----------------------------------------------------------------------------|
| 46754079 F 0-5:G>A-5:G>A   | TGCAGGATTATCATTGTCATTATTAGATCTTTTTTCTTATCTGATTCTT<br>ATGGGTGGTATTTCTG       |
| 39718541 F 0-48:T>C-48:T>C | TGCAGTTACAAGTTGTTGGAGATATCCTTTGTATGAAGGTAAGAAATCTG<br>CTGTAAAGAAGAACTTGAA   |
| 39714842 F 0-58:T>A-58:T>A | TGCAGATATTTGAAAGTAAGGGAGAGTTGGGGGTGTTCTGTAACGTGAA<br>AAAACATGTTACTAAACCGC   |
| 39715310 F 0-6:A>T-6:A>T   | TGCAGCAACTCTGTGTATTGTCTCATCCTCAGTGCTTCTGAGTAGCATCA<br>GCAAAGATGAAAGGCCCC    |
| 39725797 F 0-8:A>G-8:A>G   | TGCAGAGTAAGGCCCTCGTTCAGTTGTTTCATCAAAAGATGTTATAGAATT<br>TATTGGTGAGGATGGTTCCG |
| 39727249 F 0-18:A>G-18:A>G | TGCAGTGTGGGGAGCATTACTTAGTGCTTGTTCATCCACCATGAAGTTA<br>C                      |
| 39721859 F 0-57:C>T-57:C>T | TGCAGAGGATTGCAGGTCAGATGCCTCCCTAAGAGCCTGTTTCGAGAAC<br>GATACTAGCCTGTTTTACGC   |
| 39720420 F 0-35:T>A-35:T>A | TGCAGGCTGACAAAAGGACAGGGACACATAAAAAATTTTAC                                   |
| 39724211 F 0-18:T>C-18:T>C | TGCAGTTAGAGTCGAAACTGGGCTCTTGTTCGTGATCCATGAGCTTCGCCA<br>ATCCAAAATCGCCCAATCT  |
| 39717888 F 0-25:T>C-25:T>C | TGCAGTAGCAGAGACAAATAGGCCTTCTTCAAGATCATCAAGGAGAGGG<br>CCTGGGCAATTACAGTTGTG   |
| 39720082 F 0-5:G>C-5:G>C   | TGCAGGCTTGAGATATAACCACAACCAAGAGTTAC                                         |
| 39725269 F 0-36:C>A-36:C>A | TGCAGTCCACTTTATCCGCTATAAACAGAGAGCAAACCCTACAAATGCC<br>TTACTTTTAC             |
| 39714557 F 0-23:A>G-23:A>G | TGCAGAGGACAGATGGCAGGTACAAACCAACAATAAAATCACTTGATTC<br>TGGATTGCGCTTTTTTCTA    |
| 39717214 F 0-19:T>A-19:T>A | TGCAGGCTGTTCCCTCATTCTTCATATCTAAAAGTTCCTTTACGATACC<br>CTATACGCTTGGGTGGAT     |
| 39723687 F 0-48:T>A-48:T>A | TGCAGGTTGTGATGTTGGATGAGAATGGGAAAGAGATATCCTCCGAGCT<br>GATGGCTGAGCTGGTGGCAG   |
| 39724899 F 0-30:A>G-30:A>G | TGCAGCAGAAAATAAAAAGGACAATCCCCACAGTTCATTTGAAGGCAAAG<br>TTAC                  |
| 39713331 F 0-40:A>T-40:A>T | TGCAGCCTAACATTGGTGAAATTTTGAACAATGTTTCGGAGGCACATTT<br>TAGAAACTGGGAATTCTTG    |
| 39718240 F 0-27:C>T-27:C>T | TGCAGTGAAATCTTTTACACTGTTATCATCTCATTGATGCTTGGAAACA<br>TATGTTGGAGATTTGGTGC    |
| 39720523 F 0-9:T>A-9:T>A   | TGCAGGTGTTGGCACATATCCTTGCTCGATCCAAGTACTTAC                                  |
| 46765438 F 0-54:G>A-54:G>A | TGCAGTTGGAAGATGACAAAAAATGTAATAGATTACAGAAAGCGTATT<br>ATTGCGAGGAATGGGTTATC    |
| 39715528 F 0-52:C>T-52:C>T | TGCAGCAGCAACAAAAGCATTCACTCGATCTTGAACATTGTAGTCAAAC<br>AAGCCAATATTATCCTTCGT   |
| 39726055 F 0-61:G>A-61:G>A | TGCAGCAGCCTTCAAATTTGGAAAAGAAATAAAACAGTCAGAAAACATA<br>ACAAAACCTCGGAGTAGTTAT  |
| 39728482 F 0-27:A>T-27:A>T | TGCAGGTGTATTTGCTTATAGAGGAAAACCTCCTGTTATATTAC                                |
| 39728949 F 0-63:C>T-63:C>T | TGCAGGATAAGAAAAACGACGACAAAGCACCAAAGGAAGATGAGAAAT<br>GAGGCATTTTGGAGCCCGTT    |
| 39721911 F 0-63:A>G-63:A>G | TGCAGAGTCTTCCACTTGTAAGAAATTTTCGAGATTGATGCTATTGTTCCG<br>GAGTTTTCCCTCCAACATT  |
| 39725418 F 0-51:A>G-51:A>G | TGCAGTTTTCTTTACTTTCTTGTTCGGTCTTTGGAGAAGAGAAGAAAG<br>GAAATTTTAC              |
| 39727188 F 0-31:A>G-31:A>G | TGCAGTAAACAGCATAACTGAGCTGATACATATTAC                                        |
| 39719559 F 0-21:T>C-21:T>C | TGCAGAGAAACCGTTGAGCGTTGCAAATTCGAGAGATGAGTGGTAGT<br>GACATATTTAC              |
| 39720633 F 0-16:G>A-16:G>A | TGCAGTATTCTCATCAGGGCATAAAGCTTTAGCTAATTGAAAGAGTGTTA<br>C                     |

|                            |                                                                        |
|----------------------------|------------------------------------------------------------------------|
| 39726596 F 0-10:T>G-10:T>G | TGCAGTACGCTCTTTTCGCATGCCGTCATTGATAACGACGAGGTCGTTCTCCTTCATGTCGATAACCCTA |
| 39727799 F 0-54:T>A-54:T>A | TGCAGTATCTTATCATCCTGATGGACAGGTGTGTGCTGTCTGACTCTTTCATTTTCGTAGAAGTAGAAA  |
| 39718954 F 0-17:G>A-17:G>A | TGCAGTTTTCTCTGACCGTGCATCTTTCCTTCCATAGACTACCATTTACACTGCTAGTGTTGCAAAAGG  |
| 39727218 F 0-21:C>T-21:C>T | TGCAGTCAAAACATAAATCTACAAGAATTAGTTTTAGTTTAC                             |
| 39717274 F 0-67:C>G-67:C>G | TGCAGGGAGATTCAAAAGTTTTGAACTTGAGCCAGAACCCTGGCGAGGTTTTCACCGGAAAACATGTCCG |
| 39725453 F 0-49:T>C-49:T>C | TGCAGCATATTTGCCCGATTTTGTACTTATACAAGAAACCAAGAAGACTTCCTTTGATAGGAGATTTA   |
| 39713788 F 0-10:T>C-10:T>C | TGCAGAAGACTGCGTTCGGGTCTTCTCGAACAGCAGCACAGGGAGCAGCCCAAGAACAGAGAACAACA   |
| 39718069 F 0-50:T>G-50:T>G | TGCAGTCATTGGTGCCTACCCGGAGTGCCTGATGTGTGGAATGAAATTTTCTGTCTACCTGCTTACT    |
| 46755075 F 0-49:C>T-49:C>T | TGCAGCAATATCCTCTGTGGCAATGCAAGCCATCGGTCATATAGGATTGCGTGTACCATTGCCACCACT  |
| 39729408 F 0-32:C>T-32:C>T | TGCAGATGATGAAGAGTAAATATTTTGAACGCCTTTTTGAGTTTTGATTGATATGGCTGCTTTAC      |
| 39713787 F 0-19:C>T-19:C>T | TGCAGAAGACCCAAGCAGTCTTATTTTTTGTATGTGATAGTTCCAACCTGGTAGTCCCAAACAGAAATGG |
| 39715755 F 0-13:T>C-13:T>C | TGCAGCATTATATTCTGGCACACGCAAGCAAAACATTTTCCAAGTAGTACAAAAACCTTCTTATATATG  |
| 39723619 F 0-31:A>G-31:A>G | TGCAGGTGATATGCTCAATGTGTTTCATACTTATCTTTAGTATCTGTGTTCAATGCATTGATTGAAAATG |
| 39722834 F 0-28:C>G-28:C>G | TGCAGCTAAATTCGTAGTCAGCGGCGCCCGTGGTGGGGGTGGTGGCTCCGGCGAAAAGGGCGAGGG     |
| 39716710 F 0-6:A>C-6:A>C   | TGCAGGAAAAGGCATTGTTCACTCTGAAATGCCTGCATCCCATGGCACC CAACATGGCTTACAACCTTG |
| 39715032 F 0-55:C>G-55:C>G | TGCAGATGGGTGAAATTCACAATAGAGAAAATGGGACCCCGAGGGAAACGGGGACGTGGTGGTGGATG   |
| 39720139 F 0-18:T>G-18:T>G | TGCAGCTATATAACACGCTAAGAACGGGTGTCGTTTTAC                                |
| 46756600 F 0-44:G>A-44:G>A | TGCAGGGGAGAAGGAGATGGAACCGAAAACCTTGATTGTGAAGCCGAATTATCAAGTCAGGCTCGAAATC |
| 39715683 F 0-36:T>C-36:T>C | TGCAGCATCAACAGCATGCCCTCCTCGCCTAAGCATTGACGCTCCAATTCGGGAGCAGCGCCATCATC   |
| 39725587 F 0-57:T>C-57:T>C | TGCAGAAGCAACTACAAAAGATTTACCACCGTTGATACTTGAAGATGTTCCATCAAGTTTCAGCAATTC  |
| 39724574 F 0-7:T>A-7:T>A   | TGCAGAATAATTGTCGATGTCACACTTTCTGTTTTGGATGCTTGTACTTTACTTAC               |
| 39720009 F 0-17:A>C-17:A>C | TGCAGCATTGCGCCAAAATAGTTAC                                              |
| 39728482 F 0-35:C>G-35:C>G | TGCAGGTGTATTTGCTTATAGAGGAAAACCTCTCCTTATATTAC                           |
| 46756797 F 0-29:T>C-29:T>C | TGCAGGTGGGTGGATGAAGTGATTCCTGATGCACCCTGGGTGATCTCTCAAGAATTTATTGACAAGCAC  |
| 39718675 F 0-13:G>T-13:G>T | TGCAGTTCCTTGTACAGTTATGTCTTCCATGATGTAGTAATAATAACAAGTAATTTAGAAAAGAAAGC   |
| 46768604 F 0-65:G>C-65:G>C | TGCAGAGGTTGAAAAGCTAAAGAATTCACAAGAGTGAAGAATAAACGAGGTATGCTCTGAAATTGGGT   |
| 39714628 F 0-39:C>G-39:C>G | TGCAGAGGTTACAGACGACTAAGTACTTTTGAATCTTTCTTTTGCTATGATAAGGCTATCCCAGAGGA   |
| 39724380 F 0-36:A>G-36:A>G | TGCAGTTGTTATGTTTCCTTTTTCAAAGGAGACAACATCATGCTTGTGTTGATCACTATCTCCCCATT   |
| 39725506 F 0-33:G>T-33:G>T | TGCAGAAAATACAGAAAATATGAAAAACAAAAGTATTAGTACAACGTA AAAAATAGTGTATGCGTTAC  |

|                            |                                                                        |
|----------------------------|------------------------------------------------------------------------|
| 39716315 F 0-55:C>G-55:C>G | TGCAGCTCACAGGCGATGGCAGCATCAAATATGTTCAGGTTTTTCTTCTCTCTATCATGCTTGTTGGG   |
| 39715407 F 0-9:A>G-9:A>G   | TGCAGCACAAACGGTTATCATCTATGTGAGTAGCCTGGAGACCAATCATCCATGATCCCACTGATACAT  |
| 39716178 F 0-19:C>T-19:C>T | TGCAGCGGCGGCGGCGAAGCAGAGAAGGAGAAGAAGATTGAGTAAACGAGGAGTCTCCATTGTCTTCGT  |
| 39728907 F 0-6:A>G-6:A>G   | TGCAGAAATTGAGAAGTCTACCCAAATTGATAGGGACTTCACCTAATTTTAC                   |
| 46753583 F 0-62:A>T-62:A>T | TGCAGAAAAGGAAAAGAGGCGAACGAGGTTGATGGCTAAAATGGAGGA AATTGGTCTAACGTACAACAG |
| 39721096 F 0-29:A>T-29:A>T | TGCAGAAAAACAATGGTAATGTGGAGAAAACCTTGCTACTGTGAAGAC CAAGTTGGATTCTAGGTGTG  |
| 39714386 F 0-9:T>A-9:T>A   | TGCAGAGACTCCTACTTCAATGACACTATTGGATTTCATGAACTGGGGTCTGATATTTCTGATAATGA   |
| 39716316 F 0-24:A>G-24:A>G | TGCAGCTCACAGTTAGTCATAGTAATTTCAAGGAATACCTCTCTCGACAT TGTTCCTATGCGACCTG   |
| 46757725 F 0-59:C>A-59:C>A | TGCAGTTTCCTCCACCAAAGCTTCTTCTCAATGGTTATATTTCTTACTG GCTCCTTCCACATAAACA   |
| 39718454 F 0-6:G>T-6:G>T   | TGCAGTGGTCATCTCTGCAATACCAAGGGCAATGGCTTACCCTTGGTGG TCATAAGTACAACCTTCTTC |
| 39724223 F 0-20:A>T-20:A>T | TGCAGTTATCATCTCAAATGATATGGAAAATGACCTCCTAATCACCATTA GTACAGTGCTAAATACAAC |
| 39719935 F 0-11:A>G-11:A>G | TGCAGCAGAGAAAGGTCCTCGGGTTAC                                            |
| 39724432 F 0-63:A>T-63:A>T | TGCAGTTTCTTCAATTCAAGAGCCTGAGGCATTGAAATCAAACAGAACA ATTTAGAACAACAAGCTAA  |
| 39728653 F 0-18:C>T-18:C>T | TGCAGAAGTTACCAGTAGCAGCAGCAGTAATTTTATTAC                                |
| 39726538 F 0-42:C>T-42:C>T | TGCAGGTGCAGGAAATACCTGTTCCAATCAACTTGTGTTACACATATTGG AAATAGAACTACAAAACA  |
| 39717065 F 0-16:T>G-16:T>G | TGCAGGCACTACTTCATTTCAGTCCCATTTGGGAAAATGATTGTTCTTGAT CTTTTGCGGACGTCAAGC |
| 39722352 F 0-7:T>C-7:T>C   | TGCAGCATCATGAACAACCAGAGGTCATTCATAACAGATCTCACTCGTTT GTGGGTCTTCTCCCCGGT  |
| 39714200 F 0-62:G>C-62:G>C | TGCAGACCCATTACAAGAGAAAGCATGGGGCAAAGCCCTTCAGTTGTAG GAAATGTGGGAAGGCCTTTG |
| 39713810 F 0-62:G>C-62:G>C | TGCAGAAGATACCATACTTCTCGATAGAATACTGTCAAAAAGGTTTGA CAGAAAAATTCCAGCACCT   |
| 39722611 F 0-18:T>G-18:T>G | TGCAGCCAGAAGTTGCCCTATTCTTGGCTGAAATCTCACCTGAGTCGAGC CAGAGCCACCCTGTTTACA |
| 39722021 F 0-64:C>T-64:C>T | TGCAGATCCTGAAGCGCGGGATCTCTCCTTACCAATGGCTGTGGTTCTG ATAGGAAAAAGTATCGTAA  |
| 46765013 F 0-62:T>C-62:T>C | TGCAGTCCAGATACGAAGTCATGCACAGAAGTTCTTTTCAAAGGTCAAT GGGTACCCTTCTCTACTTAT |
| 39729413 F 0-26:A>T-26:A>T | TGCAGCCTGGTTTTGTGGGCTAAAATAACCGATGAATTATGTGGTAAAGT CAGGGATGCTGATTACAGA |
| 39725011 F 0-17:A>G-17:A>G | TGCAGCTGAAACAAGTAATAGCAATGTGCTTGAATAGGAATGTTAC                         |
| 46762606 F 0-51:T>G-51:T>G | TGCAGAAGTTGGTATTCTAGTGACAGACGTGAGTCTACTCATGATGTGC ATGTAAATCAATCAGACAC  |
| 39718881 F 0-65:T>C-65:T>C | TGCAGTTTCTAACCAGCAACCATCCAAAAGCAGCCCATCCATGTAGTCC AAATCCATGGCAGTATTAGC |
| 39717683 F 0-34:G>A-34:G>A | TGCAGGTTTTGAGTGGAGAGAAAGAAGTGTGAGAGCTCGCAGAAATTC AGGATTCGAGCCCGATGGGA  |
| 39728013 F 0-29:C>A-29:C>A | TGCAGCATTTCAAATCTAGGGATGTTCCCGTGGATCATTTCTGTGCTAT AATTAC               |
| 39727516 F 0-34:T>C-34:T>C | TGCAGCAACCATTCTTTGTGGGGCCTCCTTGATCTGAGGTTGGAATATTC AGGTGACGATTGAAAGAGA |

|                            |                                                                       |
|----------------------------|-----------------------------------------------------------------------|
| 39724843 F 0-31:A>G-31:A>G | TGCAGATTGATCTTTGAAGGAGTAGAGAGCAATTTGAATTAGTTAC                        |
| 39714417 F 0-37:T>A-37:T>A | TGCAGAGAGAGCAACGGTTTCTTTCTTTAGCTTCTCCGTATGTAGTTTCTTATAGAGGCTGTGAGG    |
| 39722081 F 0-27:C>T-27:C>T | TGCAGATGCCAAGTCCTTGCCAAAAGGCTTCTCCACAACAATCCGGGTCATCCACCAAGATCAGCTAA  |
| 46774192 F 0-24:A>G-24:A>G | TGCAGGTGACCAATTAGGATGCAGAGATTTAC                                      |
| 39723279 F 0-33:T>C-33:T>C | TGCAGGCAAACCTTCTGGAATTGCAGCTACAGCTAAAGCCACCGCAATCTCAAAGTAATATGTACATTT |
| 39719288 F 0-19:G>A-19:G>A | TGCAGAAACAATTGGACCTGGGATATTAC                                         |
| 39727097 F 0-6:T>G-6:T>G   | TGCAGCTATGAATCTGTCTCTCTTGGTGAAGCTAGCTTAC                              |
| 39725054 F 0-15:T>C-15:T>C | TGCAGGAACAAGTAATAAACTGTCAGACTCCCCAAAACTTCACTCTTAC                     |
| 39713859 F 0-7:G>T-7:G>T   | TGCAGAAGCTTTATTTTTCTCCTCCTTGTATATGTTACCTAAATGGAGTCACTAAACCTATCCTTGT   |
| 39721275 F 0-58:A>C-58:A>C | TGCAGAACCACATGCTGGAACTTGGCTGCTAATTGAAAGTTTTAGGGAATGTCCTGGAAAATATTTGG  |
| 39728470 F 0-26:T>A-26:T>A | TGCAGGCAGTTGAAAGTTGAAAAGTATGTTTTAC                                    |
| 39723757 F 0-62:C>A-62:C>A | TGCAGTAAGTGCAACCATATAATATCATGAAAATGTAATATATTGTCTACACAACACATTAGCAGGCAA |
| 39716056 F 0-54:G>A-54:G>A | TGCAGCCTGATCTTGTGTCTCTAGTGACACCAAAACGATGGGCAACATTTTCGGAGGTTATACCCAT   |
| 39716848 F 0-43:C>T-43:C>T | TGCAGGACCTTCTGAGGCAGGTGTTTACGCCTATACCAGGGTACGCAACTTTAGCCTTCTCCTTTGTTT |
| 39715659 F 0-5:G>C-5:G>C   | TGCAGGATACCTGATTTTTGTTCAAATAGTTAGGCAATACGTTGTGCTCCCAAGCAGAACTTCACCTC  |
| 39723478 F 0-60:C>A-60:C>A | TGCAGGGCTGGGAACTGATTGCCATCCACATTCTGGCTATGAACAAGCTGTTCCAGCTCAATCCCAC   |
| 39727845 F 0-26:C>T-26:C>T | TGCAGTGAGTCTGTGTTCAATCGAATCCGCGCTTCTGTGCTAAAGCTAAACCCACATAGAAATGACGGA |
| 39715223 F 0-11:G>A-11:G>A | TGCAGCAAACGAGAATCTCGGGTCTCTGATCCAGGTCACCAGCATTGTCCATCTGAGAGCAGACAAC   |
| 39719290 F 0-22:T>G-22:T>G | TGCAGAAACAGTTACAATTTGGTTGGTTCTGCCAGGATGAGCTTTTTAC                     |
| 39720847 F 0-12:T>C-12:T>C | TGCAGTTGAATGTACTTCAACGAATAATCCCTTTTAC                                 |
| 39725530 F 0-44:A>G-44:A>G | TGCAGAAAGCTGTGGCTCGGCACCATCCCGTATTTGGCCAATCCATGCTCTTCGTCACGTGGGTTTCC  |
| 39715335 F 0-40:A>G-40:A>G | TGCAGCAAGATTTTCAGCATTTTGATGAATCAGTAACCATATGAGAAATGAGATTGTCAAACGAAATGA |
| 39726096 F 0-24:G>A-24:G>A | TGCAGCATTTTCTTCTCCTCACCCGGACATGTTTGAGAAGTTGAAGTCTTGGACAACCTAAAGAATCTG |
| 46757321 F 0-36:C>G-36:C>G | TGCAGTGCCTCTGAACGAGAGCTAATCTGCCTCCTTCCAGGCCGAGCACTTCCAAAATCCATCAATATA |
| 39723599 F 0-22:C>T-22:C>T | TGCAGGTCCTTTATATCAACCCAGCAGCATCGGCCCAACAACCTCATGCTTGCTATTCTTCCGGATTCC |
| 39721039 F 0-36:A>G-36:A>G | TGCAGAAATGGCATCCTGATAAGCAGAAAGATCAGGATGTTGCCACTTCAGATTTTCAGGAAATAAACC |
| 39717165 F 0-6:T>C-6:T>C   | TGCAGGTGGAATAACTCCAGAGAGTGTATATACAGCTTTGGAACCTTTTGCTTGACCTTCTAAGTGG   |
| 39719639 F 0-6:G>A-6:G>A   | TGCAGAGGTTTTTCTTACCTGTCAGACCAATTTCCCTTTCAAGATCAGGGGAGTTAC             |
| 46755282 F 0-12:A>C-12:A>C | TGCAGCAGTTGCAAATTGTTGAGAGCCACCAGATTGCTGCCATTGGTGGCCTTCACTCAAACACAGTGA |

|                            |                                                                         |
|----------------------------|-------------------------------------------------------------------------|
| 46760713 F 0-6:A>T-6:A>T   | TGCAGAACATATACGAGCTCCTGGTTAC                                            |
| 39715946 F 0-8:T>G-8:T>G   | TGCAGCCCTTACAGTGCAGTTGTTCTTGTCTCACATCCTCAACAAGGAAAGTTGACGATTAC          |
| 39716354 F 0-63:A>C-63:A>C | TGCAGCTCGGAAGACACCCTTTGCACCGAACGGGAAAAAGGGCACCAAATTTGCAGAATCCCACGCAC    |
| 39718849 F 0-25:G>A-25:G>A | TGCAGTTTATGGCAGTCAACGCTATGTACGGTTTTCCACCAGAAGTGCTTTCTTCTGCTCAGGTCTCTTC  |
| 39726385 F 0-32:C>T-32:C>T | TGCAGGAGATTCTAGGCAACAATATTCTTCCCCTGTGTGCGAGGTGATAATTACAAGTTCCATGCTGCTG  |
| 39725920 F 0-13:G>A-13:G>A | TGCAGATTGCTCGGGGGGCTGCGGGGGGCTGGCTTATTGTCATCAATCCGTGAACCCCATATCCTCC     |
| 39717572 F 0-45:T>A-45:T>A | TGCAGGTGTAACCTGTGCGATCTAATGGTGGAAATGGACCGCATCTTACGTCCTGAAGGAACAATAGTG   |
| 39725296 F 0-16:T>A-16:T>A | TGCAGTGACAGGCCAATCGACATGAACTTTTGTTTAC                                   |
| 46762815 F 0-64:T>C-64:T>C | TGCAGACTTTCTTGTTCAGCTCGAAAACAGAAGATCCATCAAGGTTTGTAATGCCACTGTACTATTGAA   |
| 39728826 F 0-45:C>G-45:C>G | TGCAGGAAAACAAAATGCAGACAAATCCTTCGTACGCATTGGCAGCCTCTCCCAGGTGGATACTTACA    |
| 39729095 F 0-20:A>G-20:A>G | TGCAGCTTGATTGCAGTCTCAGGGCCATGGCCAAACACATAGACCTCATGGGAGTAAAACATCATTACA   |
| 39725354 F 0-17:T>A-17:T>A | TGCAGTTAGATTTTGTGTTTACCACCTGAACAAGCCTGGAGAAGGAAATTAC                    |
| 39719316 F 0-16:C>T-16:C>T | TGCAGAAAGGAGAAGTCGATGCCATTAC                                            |
| 39718056 F 0-33:C>T-33:C>T | TGCAGTCATCAAGCATATGTCCCCTGATATAGCCAAGATCCGCAAGCTTGTCAGGCAGTCTAAATGTTT   |
| 39726637 F 0-68:T>G-68:T>G | TGCAGTCAAATCAAGTAGTTTTATATAAAATGAATCTGGCTGCCAGTAGAGAGAGAGAGAGAGAGAT     |
| 39716662 F 0-39:A>G-39:A>G | TGCAGCTTCTCATCAGATGCATCTGTTTTCTGTAACCTATCTTGAGTGGA TGATGCAACAGAAGTTTC   |
| 39718838 F 0-24:G>A-24:G>A | TGCAGTTTAGATACAAGAAACACAGATGGGCTATTGCTCCTAAATCAAAAATGAAGTCTACCTTTCTG    |
| 39726238 F 0-29:C>G-29:C>G | TGCAGCTACTATTCTATGGCGTTTATGGCCTCAGCTGTAGTTTTATTGATCTGGGCTTTGTTTCAGACA   |
| 39728106 F 0-9:A>G-9:A>G   | TGCAGTTGAATTCAAAACCAGTAATTTTGATTAC                                      |
| 39719539 F 0-23:T>G-23:T>G | TGCAGACTATTCAATCACACGTATAACATAACCCAAGGGTTTAC                            |
| 39728284 F 0-33:A>G-33:A>G | TGCAGCTATTTCGTCGCCGAGCTCCGGCCGCCACCAATCTTCCCGAAAGATGTCATCGACGACAACCCTTT |
| 39717791 F 0-63:A>G-63:A>G | TGCAGTAATCCTATAGATTTTCATGTCCGAGACTAGCATTCCAGCATCGTATAAACCTGAAAGTAGTAGA  |
| 39726965 F 0-33:G>A-33:G>A | TGCAGAATACTCTGAAGAATGAAGATTTCCGTAGACCCGAACACTTAC                        |
| 39720107 F 0-13:C>T-13:C>T | TGCAGCGGTGATGCTGTGCTTAC                                                 |
| 39718308 F 0-17:G>T-17:G>T | TGCAGTGATGACACCAGGAGGTCCTCTGGATCTCTTCTGTGTTATTTAGGAATCGTATCATATTTAT     |
| 39721231 F 0-35:T>C-35:T>C | TGCAGAAATGAAATCAACATTTTCTAATAAAACCTTGTGAGCATCTACTCATTGTCAGTATAATGAT     |
| 39717202 F 0-32:C>T-32:C>T | TGCAGGCTGCTGCCTTGGCTCTTAGGAAGGTCCCTCAATGCAACAGTTCA TGGACGGATAATTATATTA  |
| 39721389 F 0-11:A>G-11:A>G | TGCAGAAGCTGAAGGAAGAGAATGGGAAGATGATGATGACTTTTCCAGTAATTTTTTAGCAGAAATCAT   |
| 39714886 F 0-15:A>T-15:A>T | TGCAGATCCATAAAACCACAGCTAATAAATGGTATTATGAGACAACCAAAAGGCCAGCAAAAGAGTCA    |

|                            |                                                                            |
|----------------------------|----------------------------------------------------------------------------|
| 39728122 F 0-16:G>C-16:G>C | TGCAGAAAATCATCGAGTGTATCGAAGCTTGAAAGCTTATACAGAGTTA<br>CCAAGGTTTTGGCAGGGCAA  |
| 46755320 F 0-62:G>A-62:G>A | TGCAGCATCACGAGTGAGCAGCAGTCCAGTCAACCAAGTAGTGTGGAGA<br>GTGAGAGACGCCTGTCTGAT  |
| 39714267 F 0-8:G>A-8:G>A   | TGCAGACTGGTGGAAATCTTACATTAGAATAGCCTTGCAAATTGCAAGTAT<br>ATCAATTACCATGATCATA |
| 39726805 F 0-45:C>T-45:C>T | TGCAGTTCCTTTCTTGGTGACTATCGCCCGCTTATTCAGGATCCTTCCGGCA<br>ATGTAGTTGACCAGGTAG |
| 39715628 F 0-39:C>T-39:C>T | TGCAGCAGTCGTATCTTTTGTCTTGCCTGGTATGATGGCGAGGAAGGAG<br>GTGAGATGGAGATTACAGC   |
| 39725679 F 0-44:G>A-44:G>A | TGCAGACTCGTAGCCAACTAGCCACAAAGTCTTTATTGATATTCGAGAGT<br>AAGCGGATACAGAAGATCT  |
| 39727181 F 0-19:A>G-19:A>G | TGCAGGTTTCGCCGTGCATGAATATTTAC                                              |
| 39713454 F 0-43:T>A-43:T>A | TGCAGAAAATATACAAATTAGTGAATAAACCAAGCAAACAATACTA<br>ATAGTGTGTTTAC            |
| 39723003 F 0-48:G>A-48:G>A | TGCAGCTTATAATATAATCCATTTTTGAAGAGTTCAATCTCATCCTCTGT<br>GGTGAATATACATGTCCAT  |
| 39727515 F 0-56:T>C-56:T>C | TGCAGCAACCATTCTTTGTGGGGCCTCCTTGATCCGAGGTTGGAATATTC<br>AGGTGATGATTGAAAGAGA  |
| 39715412 F 0-11:G>A-11:G>A | TGCAGCACAACGCTTTGCTATTTTAGTTGAGATTCGAAGCTCTGTTGGCC<br>TGGCCTCGCAAACAGGACG  |
| 39720384 F 0-22:G>A-22:G>A | TGCAGGCAGCCTCAATTGAAAAGCATCTTGGTGTATCAAGCGGATCTCT<br>TAC                   |
| 39728059 F 0-10:A>G-10:A>G | TGCAGGCTGTACATGCTCAAGTTCTGTTGGATTCTTTAC                                    |
| 39720437 F 0-18:C>T-18:C>T | TGCAGGGATACTTCAAGACTACAATTATTGTTCTATATTTAGATTAC                            |
| 39713795 F 0-30:C>A-30:C>A | TGCAGAAGAGATCATTACGGGCGAGACACCTCAAAGGCATCGGTTAGC<br>TATCTTGCCGATGCTTCATG   |
| 39718518 F 0-68:T>A-68:T>A | TGCAGTGTTCAGTCAGTCAGTTGAGCAAGAATTGATTCAGATATCAGG<br>GATAACAGCCAGGGATACTT   |
| 39723122 F 0-19:C>T-19:C>T | TGCAGGAAAGTCAAACACCACACCATGCAACCTACATTTTGAAGC<br>ATGTGTTAGCAGGGAAGTTT      |
| 39717249 F 0-41:C>A-41:C>A | TGCAGGGAACCTGGAGGTGTCAGTATCTATGGTTCAGTTCCGAGACGA<br>GAATTTTTCATGTATGTCAT   |
| 39719560 F 0-12:T>C-12:T>C | TGCAGAGAAAGTTCAGTACATGCTCCTTATCCCCTCTGTTTGCAGTTA<br>TGTTTAC                |
| 39727175 F 0-31:A>T-31:A>T | TGCAGGTCATAATGTAGGCTACTGATGTTGCAGAAGCAAACCCATTACA<br>GAATATTAC             |
| 46773627 F 0-52:C>T-52:C>T | TGCAGCTGCTCATTCTTCCCCACTCAAAGGAATTTCAACTTCTTTTGGTG<br>ACTGATTATCACTTTTAC   |
| 39727471 F 0-10:T>A-10:T>A | TGCAGATATCTTCTCTTCATCTGATCCTTTTACTGCTACCTCAAATATTTT<br>CTCCAGTTCTGCTAAGCT  |
| 39724063 F 0-7:A>T-7:A>T   | TGCAGTGATTGCTGGAAGTGAGTACGTGAGATTAGATCGTGAACATGAG<br>CAGAGGCAGCCTTTTCCAAA  |
| 39725022 F 0-15:G>C-15:G>C | TGCAGCTGGCGGTGCGCCTGCCGGATACATTGATCCGGTTAC                                 |
| 46757112 F 0-16:C>T-16:C>T | TGCAGTCAACACCTCTCTCTTCGACAATCTAGGGTTTCATCGAGACGCCT<br>CGTTTAGCTTCAAATTGTT  |
| 39721490 F 0-57:C>G-57:C>G | TGCAGAATCTCATCATCATTTGGATGGAAGTGTATCTTCCCCTTCTATA<br>GATACCACAAACAACCTGCC  |
| 46757326 F 0-16:T>A-16:T>A | TGCAGTGCAGCTGAATTGAGGCATGGCAACAAGAAAGAATCTGATATT<br>TTGATGGCCAAGGCACTGCA   |
| 39715574 F 0-35:C>A-35:C>A | TGCAGCAGCTGAGATAATCATGATAGGGTTTTTGGCTATGGAAATGGAA<br>TTGTAATGAATTATAACCCA  |
| 39722458 F 0-58:T>G-58:T>G | TGCAGCAGCTTGCCCGACCCATGTACAGCAATCCACCTGTTTCATGGTGCA<br>CTGATAGTTTCAACCATCC |



|                            |                                                                              |
|----------------------------|------------------------------------------------------------------------------|
| 39729565 F 0-19:G>A-19:G>A | TGCAGAATAGAATTTCAATGCTATCTTAGAATTTCCAGCACCTAATCCAT<br>TGGGTAATCTAATTTACAG    |
| 46762396 F 0-24:C>T-24:C>T | TGCAGAAAGAGTGATAATTTTATGCATAAATGAACCAGCAAAAACAAATT<br>ATTCCAAGCACAAAAAGTAA   |
| 39716126 F 0-48:C>G-48:C>G | TGCAGCGATCTGGATCTGATATCAATCAAACATCTGACGAACAAAGCTC<br>GCGGTATTGTCGGTATCGCA    |
| 39722520 F 0-24:C>T-24:C>T | TGCAGCATCATAATATGTATGAAACGCCTTTCTGAAGAATTTCTTTTGGT<br>CGGCAGTAATATTGAGGCT    |
| 39725246 F 0-8:A>G-8:A>G   | TGCAGTAGATTTTGCAAAGTTGAACCTTAC                                               |
| 39717662 F 0-55:G>A-55:G>A | TGCAGGTTTACGAACAATTGAAAATTGAGCCAGGAATGAAAAATGAAAG<br>AAAACCTGCTGGTCTTACATT   |
| 39714404 F 0-64:C>T-64:C>T | TGCAGAGAGAAATGCAATGGGAGGATTGTGCGATTGATGATTTTTTATCA<br>CTGGTATGTTTGTAACCTGA   |
| 39716391 F 0-23:A>G-23:A>G | TGCAGCTGAAGAATCCCCCTGCTACATCCAGAAAATTTGACAATATTATG<br>GAAAGGAAACCATAATATA    |
| 46754083 F 0-42:C>T-42:C>T | TGCAGAATTCAGAATGCCATAGCACCATTTACAAAGAAGAAACTTTTTG<br>GGTCTTCCAAAAGAATGTTG    |
| 39720512 F 0-7:T>G-7:T>G   | TGCAGGTTATGCTCTTTGATGAAAACAGGAAACTATTGGATAGCAGGTTT<br>ATTAC                  |
| 39726807 F 0-19:G>C-19:G>C | TGCAGTTCCTTTATTCCACGTTCCAGTTCCTCAACTTTCTGTTCCAATTC<br>AACAATACCACAAAAGGC     |
| 39723053 F 0-54:G>C-54:G>C | TGCAGCTTGAAATATAGACCCGATGCCGTAAGTTGTATGAAAAGTATTT<br>GGTGTGGTCACCTGAAAAC     |
| 39714854 F 0-23:G>C-23:G>C | TGCAGATCAAGTATTTGTGAACAGTGTCAAACCTCCCAGTACTCCGTTG<br>TGGAGTCTTCACTGCTCT      |
| 39722007 F 0-43:G>A-43:G>A | TGCAGATCATCCCATTGTGTACAGACGAATGATGCTTCTGGTGATGACG<br>TGAATAACCCATTGTTTTG     |
| 39718978 F 0-24:A>G-24:A>G | TGCAGTTTTTCACTACCAAGCCATATGCTTGTGAGCCTTCCAGCCTTCCC<br>AAGTATCCTCCAAGCAAGG    |
| 39728567 F 0-24:A>G-24:A>G | TGCAGCCATCATCCCAAAGCATGACCAGCATTGAAAGTTGGAGCACCC<br>CACTGAAGAGGGTATGGAAT     |
| 46775928 F 0-14:T>C-14:T>C | TGCAGTTGCTCTAATGAAACATAGGGAAACCAAATTTTTAC                                    |
| 39717415 F 0-49:T>C-49:T>C | TGCAGGGTTTTATATTTACAAATACATTTCTAAATTCCTTTTCATATGGTT<br>TGATCTATTATTGTCTGT    |
| 39715713 F 0-12:G>A-12:G>A | TGCAGCATCTCCGGCCATCTTCTCCGTTCTGTTCACGATTCTTCGTTGT<br>CGGTATGATTGACTCTTA      |
| 39727033 F 0-22:A>G-22:A>G | TGCAGATCGGGGACCACGTCCAACCTCGCCTACACTCACGAAAGTGAATC<br>CGCCTTAC               |
| 39720534 F 0-14:C>A-14:C>A | TGCAGGTTCTGTCACCGATCTCTCCCTAACAGAATCATATTTAC                                 |
| 39726602 F 0-68:T>C-68:T>C | TGCAGTAGAAACAAGACATCTATTCTGGAAGATCAGATTTTCCAGTA<br>GGATTACTAGGGCTAGGTGT      |
| 39715614 F 0-6:G>A-6:G>A   | TGCAGCGGTAAATTTTTTTCATCAAAGAAAGGGGATGCCTACGTATCATCT<br>AGTAGTGACATTGCATCTTG  |
| 39716826 F 0-33:G>A-33:G>A | TGCAGGAATTATCTTCATACCACCGCTACCTCCGATTACCGCAATCAACC<br>GATCATCCTATGAAGGTTT    |
| 39715306 F 0-50:G>C-50:G>C | TGCAGCAACGTGGACTTTTGGGATGCCTGTATTGCTCAAAGCAGCCTTGG<br>GAAGAACAGTTTGAGAGAT    |
| 39717537 F 0-34:C>T-34:C>T | TGCAGGTGCAGCCCAAGGCAGTGAAGAGGCTGTGCAGAGTTCACAACAT<br>TATAACAGTGAATGGGCAGT    |
| 39727306 F 0-14:T>G-14:T>G | TGCAGAAGCATTGTTGGGGAGCTAGATGAGGAACCTGATTCTAATTTGG<br>ACTTGTGCAAAATTGAGAGCT   |
| 46756835 F 0-53:A>C-53:A>C | TGCAGGTTTCCAGGAGTTTCTTCTCGATGGGCAACTTTGACTGAACTTTTTT<br>GTAATTTACCCACTTCTCTG |
| 39720323 F 0-5:G>T-5:G>T   | TGCAGGAGATAGGGGAGCAATTATTAC                                                  |

|                            |                                                                         |
|----------------------------|-------------------------------------------------------------------------|
| 39715439 F 0-54:C>T-54:C>T | TGCAGCACCAGCTACCTCCATAAATCAAAAATTAGCAAGACACAGGGATATCCTCCATGAATTTACACA   |
| 39717533 F 0-66:C>T-66:C>T | TGCAGGTGATGGTGAAGTGAACGTTGATGAGTTCCTTTAGAATGATGAGGAGAACAACATATGGATTCTA  |
| 39726181 F 0-32:T>A-32:T>A | TGCAGCCTTGGAGATGCCGTACGCTGGAAGCATTGTTGTCCATCCATTTGCTTCTAATCTGTCTTCCTT   |
| 39716678 F 0-57:T>C-57:T>C | TGCAGCTTTGGTTTGGATCTTTTGGAGCATTCCCTCACTTTGTCTGCTGTTGACATGCTATGAAACTCCT  |
| 39718355 F 0-46:A>G-46:A>G | TGCAGTGCCTTCTCAACCACACCACACTTACAATACATATCAATCAAAGA GTTTCTACAAAAACGTCT   |
| 39727061 F 0-28:A>G-28:A>G | TGCAGCAACCCCTCTTCAAATGGGTTCCATTGCTTGGAGGCTTAC                           |
| 39728663 F 0-32:T>C-32:T>C | TGCAGTCAAATTA CTCTTATTTTTTAGGATCTTCATCCATATTATTAC                       |
| 39726814 F 0-29:T>C-29:T>C | TGCAGTTGACTATCTAACCTACGGCTCAGTGGATTTGCGCTTTGCTCCCTATGGACCCTTTTGGAAAGTT  |
| 39720419 F 0-13:G>A-13:G>A | TGCAGGCTCTCTTGCAGAAAATGCACGCACTGTAAGGATTTGCAATTGTTATGATTAC              |
| 39713713 F 0-64:A>T-64:A>T | TGCAGAACCTCCTAATATTGCTGCAAGGACCCTTGACATCTCATGTGGGTCTTCCCTTACCGATGCT     |
| 39722862 F 0-42:C>T-42:C>T | TGCAGCTAGAATTTTTTGAAGAGCCTGGTCTTGTA ACTCGATCGAGACTCCTCTCCGATAATGGTGA    |
| 39722759 F 0-67:T>C-67:T>C | TGCAGCGAAGAGTGTGAACGACATTCCAAGGTATCAATACAATTACAATATAATCTCTCGCTGCTTGT    |
| 39729173 F 0-62:T>A-62:T>A | TGCAGTTGGGATCTTGCTAAGATGCATTCAACAGGATGGGAAGTGCAGAAATATCATAGCTGTTACAGA   |
| 46776198 F 0-31:C>T-31:C>T | TGCAGAGATGCAACCATTATACGAAGAGTTTCAGAAGGATTAC                             |
| 39726050 F 0-27:C>T-27:C>T | TGCAGCAGCATCTTCACTATTCTTGTTCCTTTCCGAGATTGACACCAAGAA TTCCAGGACCAGCTTTACC |
| 46754511 F 0-9:C>T-9:C>T   | TGCAGAGTGCTTGCTCACTTTTGCACGTGAATAAGATATTTGAAGTTGGCATATCAGAGAATCTTGGAG   |
| 46767068 F 0-33:G>A-33:G>A | TGCAGCAAGCTGGCCAAGGAAGAATCTGTGCTCGTTCTCCCTGGTAATCAACATTAC               |
| 39716419 F 0-62:C>T-62:C>T | TGCAGCTGCACCATTCTCTCCCTTGGTTTTATTATTGCATAAGGAGGAAA TGGGATGGTTGTCTATGTC  |
| 46775546 F 0-23:T>A-23:T>A | TGCAGAAGGTATCTTGTGGCTGTGTGAGTAATTTGTTTCAGTTCAACTATTTAC                  |
| 39724747 F 0-7:T>C-7:T>C   | TGCAGAGTGCTAAAACAGCAACTCCGTTTTAC                                        |
| 46760930 F 0-24:C>T-24:C>T | TGCAGCTTCTTTGCTGATCGTTGACAAAAGTTTTGCAGCAGTGTTAC                         |
| 39725508 F 0-43:G>A-43:G>A | TGCAGAAAATGGAGTCAAGAGAAAGTGGCCATTTTCAAGCAGTGGCAGTTCAACTTCCATTGGCAGTG    |
| 39728023 F 0-6:C>T-6:C>T   | TGCAGCCTACAGAAAAACATTCATAAGACA ACTGAATAAGGAACAATAGATTAC                 |
| 39714898 F 0-63:G>A-63:G>A | TGCAGATCCTTGTGCGGGTTACATTTTCATGTTTACTTTGCTCGATGCTGATGTCAATATGGTGAATTG   |
| 39720373 F 0-29:A>G-29:A>G | TGCAGGCAACTTCCAGTCGGTTACCAACAAATGGAGCTCAGGGGACAAA TTAC                  |
| 39727693 F 0-47:C>A-47:C>A | TGCAGGATATCAACTTGATATCGTCATTCTAATTCACTAAATTCATACAA CAATTATAATCTTCTCTCA  |
| 39717768 F 0-59:T>C-59:T>C | TGCAGTAAGCACAGAGCATTGTGTTCAATATTACAATGTCATATCTGTCA TATGTGGCTTCAAATCTT   |
| 46754517 F 0-40:T>C-40:T>C | TGCAGAGTGTTCTTCCCTGGCATTCTTCAAGGGGACAAATCTGACTCTCTTCTGTATGGTTCTGTTGACA  |
| 39717598 F 0-68:C>T-68:C>T | TGCAGGTTATAAATTTAGGCCGTAGATTCATAGCATCTACAAAATACATCTTCTAACTTTTCTCCCCC    |

|                            |                                                                          |
|----------------------------|--------------------------------------------------------------------------|
| 39727379 F 0-64:T>G-64:T>G | TGCAGAATCCAAAACCTCTGTACTACAAATGGGAAGTCAAGTCCGAATTG AAGTCCCCCGACTGCTTTAC  |
| 39728023 F 0-11:G>A-11:G>A | TGCAGCCTACAGAAAAACATTTCATAAGACAACCTGAATAAGGAACAATAG ATTAC                |
| 39715852 F 0-24:G>C-24:G>C | TGCAGCCACCTTTTTCAAATCCTCGGCAGTGCTCTTTCCATCCCAAAATG ATTCAAGAGCAAACCTTGAG  |
| 46762283 F 0-55:T>C-55:T>C | TGCAGGTTTTTCAGCATGAATCTTTCTGCTCCATTCATTTGTGAGTTCTTCA GAGATGTGCAGGAGAAAG  |
| 46775149 F 0-30:A>G-30:A>G | TGCAGTAGAACCTAAATCAAAGAAAAGGAACCTTATCAACATCATAATC AAGCCAAAGAATTCTAATCT   |
| 39721247 F 0-16:T>C-16:T>C | TGCAGAAATTGCAGGCTCGAGATTCTGGAACCTTTCGCAGCGCTAGTATC AGAAATGTTTCGATCAAGACG |
| 39729130 F 0-43:C>T-43:C>T | TGCAGCATGAAGGGCTGTCCGACCCATACTGTCCACCATATTACAGCAA TCAGGACGACAATTTACAAG   |
| 46763984 F 0-13:C>T-13:C>T | TGCAGCTAGAGGCCTTTGATACGTCAGCCAGGCGTTCCGGTTCAAGCTA TGCCACCACTTACCCAGCT    |
| 46772327 F 0-12:T>C-12:T>C | TGCAGTCAAGGCTCTTGCATGGTGTCCATTCCAAGGCAACTTGCTCGCAA CAGGTGGAGGTGCTGGAGA   |
| 39725937 F 0-25:T>C-25:T>C | TGCAGATTTTCAGGATAAGCGTTACTTTTACTACAAAATTCAAAACAAA AAATGTAACCAACTAAATCA   |
| 46760877 F 0-26:C>T-26:C>T | TGCAGCCTAAGAAGCCTAAAACAAACCTGATCTTTTATGATTAC                             |
| 46775699 F 0-42:G>A-42:G>A | TGCAGGGGAGGTGATACCAGCAAACCTTGGCAGCCACAATGACGGAGAG TGGAGGGCTATCGGACGGAAA  |
| 46775909 F 0-21:C>T-21:C>T | TGCAGATCCTGTAAAGCCAATCATCCTACACAGTGGACCATATTAC                           |
| 46775920 F 0-18:C>T-18:C>T | TGCAGGTGTATTTGCTTACAGAGGAAATTTGTCCTGTTATATTAC                            |
| 46772963 F 0-9:C>T-9:C>T   | TGCAGCTCTCGTTTTAGCACTCATCTTAC                                            |
| 46774415 F 0-33:T>C-33:T>C | TGCAGAAGATGCAAGCTAAGCTGGATAAGTGCATCAAAGAAAAGAAAT TTCTAGATGACGTTAGTGACC   |
| 46775310 F 0-12:C>T-12:C>T | TGCAGGAATCATCTCCACTCTTCGATTAC                                            |
| 46776067 F 0-57:G>A-57:G>A | TGCAGCAGAGCTGGCAAGGGATCGGATTCTGATTGGAATTTGTGATGGT CCTATGCTGAGTAAAAAAA    |
| 39729616 F 0-39:A>G-39:A>G | TGCAGTTCGGTGGAAAGATTCTTGTTATTCCACGCTGAATATCTGGTGCCC TTCCCAAAGTTGTTACAGA  |
| 39728455 F 0-19:G>T-19:G>T | TGCAGATCGTGAATTGTTGGGTCAGAAGTTCTGGATGTCTTAC                              |
| 39719401 F 0-25:T>A-25:T>A | TGCAGAAGCAGGGGAGAGTAAGGTATTATTGAAATTAC                                   |
| 39713697 F 0-23:C>A-23:C>A | TGCAGAACCACTAATTAGAGGAACAATTTGAAATGGATGACAATCTAAC TGAGAATCTGTCTAAAATCT   |
| 39719491 F 0-17:A>G-17:A>G | TGCAGACAAACCAAAAGATTTTCATTGTCAATATCTCTGTAATTTAC                          |
| 39719480 F 0-6:A>C-6:A>C   | TGCAGAATTCTACCAGTAAGACACCTTAC                                            |
| 39724772 F 0-18:T>C-18:T>C | TGCAGAGTTCAGTTCAGCTATCCACATTAC                                           |
| 46774612 F 0-47:A>G-47:A>G | TGCAGTATAAAGGCGCAGAACAAGTGAGATATTATATCCTTGTTAC AACCTCGGATGCCTGTGGAT      |
| 46775568 F 0-10:T>A-10:T>A | TGCAGCATCATGAGTAAGAAGGTGGAACCATTAC                                       |
| 46775579 F 0-18:T>A-18:T>A | TGCAGCTGAAGCACTGAATCTTTTCAATGAAATGATTAC                                  |
| 39724313 F 0-35:T>A-35:T>A | TGCAGTTGATCATCCTCTAATGTAGCATACCATGCTGGAATTTCTGTGACC CCACCAAAGTTGCCTTGAG  |

|                            |                                                                         |
|----------------------------|-------------------------------------------------------------------------|
| 39724338 F 0-21:G>A-21:G>A | TGCAGTTGCTCCACCTGTTTCGAATGTGCGAGTGGGCCCTGAGACAGGTTGAACCCGATTTTCCTTATA   |
| 39727013 F 0-28:T>C-28:T>C | TGCAGAGTGATCATCTCCTTTGGTACCTTACTCTTAC                                   |
| 39728281 F 0-18:G>T-18:G>T | TGCAGCTAGTGTCCAGTAGTCTAGTGAAAAGTTCATGTCCTTGGCCATGTATTCGCGTGTAAAAGGAAA   |
| 39729066 F 0-39:T>C-39:T>C | TGCAGAAGTGTGCTCTTCAAGTCTGTGAAGCCACTGGGTTGCTGAGTTCGAAGATGCCATTGATCTATC   |
| 46767095 F 0-20:A>T-20:A>T | TGCAGCAGTAGGTTTGATCTAACAGTTAC                                           |
| 46770746 F 0-25:C>A-25:C>A | TGCAGAAGGTAGCTGTTATTCGGGGCAAACCTTAC                                     |
| 46770870 F 0-23:C>G-23:C>G | TGCAGCAGGCTTTCTCTTCTCAACCTTAC                                           |
| 46770879 F 0-15:C>G-15:C>G | TGCAGCATCCTTGGTCAAGTGTCTCAGGTATATTTTTGGGATTTAC                          |
| 46772412 F 0-65:G>A-65:G>A | TGCAGTTACCATGGATGAGCAGGGAAATGAGACGTTTGATACAAGTGGCGCTTTGATAAACTACGCAA    |
| 46773536 F 0-10:C>T-10:C>T | TGCAGCAGATCACTGGTTTGGCCAAACAGGCAAGTTTGACACATTCACCATGTCAACAATGCATTATTT   |
| 39719342 F 0-19:A>C-19:A>C | TGCAGAAATTTATGGGCTCAATATTCTTGCAGAAAATGTTTCAGGTAAGACTTTCTTTTAC           |
| 39715534 F 0-35:T>A-35:T>A | TGCAGCAGCAACTACCACTGTTGTAGCCAAGCGCTTTGCTTTTCTATTAGCTTCACTTATAGAATTATT   |
| 39722627 F 0-23:C>A-23:C>A | TGCAGCCATCGGGAAGGAGTTCACAAGAAGCACACTACTACTTCAAACCAAAAGAGAAAATGGATATAGC  |
| 39724861 F 0-8:A>C-8:A>C   | TGCAGCAGAAGTATGATCTGGAAACAAAGAGATTTAC                                   |
| 39725471 F 0-35:G>T-35:G>T | TGCAGGAATGATTCTAAGTTAGCAATTAGAAGTGCACCGGTGTTTTGAAGTGTAAATTTCTGTGAGCA    |
| 39715760 F 0-27:G>T-27:G>T | TGCAGCATTTCAGATATTCGCAAGCTTCGTTTCGGAGCAGCAGAGTCCCAAATCATAGATTGATCAGCCTC |
| 39717749 F 0-46:A>T-46:A>T | TGCAGTAACTAACAACCTGATACATATATGATAATATGATCAACATAAAAATAATGAAATGCTCATGATC  |
| 46755567 F 0-45:T>C-45:T>C | TGCAGCCGTAGTAATCCCCAAGGATAATTTTCATTGTGAGTGCATTATTTTAGCATAGCAAAGTCGTCC   |
| 39714482 F 0-62:A>T-62:A>T | TGCAGAGCAAATTGCTTTTGAAATCTTGACATGCTTTTTTCTGAGTTCCATCATTATTATTATAGGTGAA  |
| 39726423 F 0-50:T>A-50:T>A | TGCAGGCACATAGAAAGCTAATGGTGAGAAGCATAAAGAAAATCCAACATTGGAAGCAACTCATCTAA    |
| 39720706 F 0-32:A>T-32:A>T | TGCAGTGAAAGGTGGAATTTGGGTGAATGATCAATTAC                                  |
| 39716529 F 0-21:C>T-21:C>T | TGCAGCTTAGTTTTTCGACTTCGAATGCTTTACGAGCCAGTCAATAACAGTGTGATATTGGTGGAGTT    |
| 39726257 F 0-34:A>G-34:A>G | TGCAGCTCCAGTCGGTGGGAATGGCTGTTTGATCATAAAAAACCAAAAAGGAATTTAGAAATAACTTAC   |
| 39726994 F 0-25:C>G-25:C>G | TGCAGAGACTGGTGAATCTGTGCTCCTTCTTAC                                       |
| 46755438 F 0-30:C>A-30:C>A | TGCAGCCACCTCTGCTTGCATCGCAGTGCGCAAGATCCAACCTTGGTGTCGACCACAGCCAAAGGTGG    |
| 46755747 F 0-8:A>G-8:A>G   | TGCAGCTAATAGGCAATACTCCTATGGTGTATCTCAACAAAATTGTAGATGGCTGCTATGCCAAGATTG   |
| 46768538 F 0-10:A>G-10:A>G | TGCAGAGATCACGGTGCCATGTAGGAACATTTTTGTATGTCAATCTGGCAGTAACATCAAACATGATGA   |
| 46755807 F 0-63:A>G-63:A>G | TGCAGCTCAGCCATAAAAACCTTGTGCAAATTAGATTTGCAAAGTTCATCTGTTTTTCATCAAACCTTA   |
| 39725706 F 0-32:A>G-32:A>G | TGCAGAGAAGTGCAAGAAAGGAACATCAAACAACCCAGCTGCCAAAGAAACGAGTAGCTCATGTCGCTC   |

|                            |                                                                            |
|----------------------------|----------------------------------------------------------------------------|
| 39726298 F 0-25:A>G-25:A>G | TGCAGCTGCTGTAGAATCGATTGGAAATTCTCTTCTAAAGGATCTCTCAA<br>TGCCTTACCCAATCATCTC  |
| 46764364 F 0-38:T>C-38:T>C | TGCAGGAGTAAGCTGCAACAGTTGGCTGAAGATGGCCATAGACAGCAAG<br>AGGAGCTTCTTCAACGACAG  |
| 39726437 F 0-11:A>G-11:A>G | TGCAGGCGAGGAAACTCATGGCCATCCATCAATTTTCATATCCACCCTTC<br>TTCCAAAACCTTCATCCAA  |
| 39728526 F 0-22:A>T-22:A>T | TGCAGACGTTTTAGATACATTGACTGTCTTCTACGAAGGTCCATAGAAAG<br>ATTCTGAAGCTCTGTAGCA  |
| 46757776 F 0-66:C>A-66:C>A | TGCAGTTTGGGGACATCACTTTCAGAGGGAAGCCATTTTGAAGAAACC<br>TACTAATAATCCTGAGGCAT   |
| 39716073 F 0-51:C>A-51:C>A | TGCAGCCTTCAACCGAGGGCTAGGCTCTGGCTCACCCCTTCTCCAAAATAG<br>GCGACAATTTGCCAGCATC |
| 39726526 F 0-50:C>T-50:C>T | TGCAGGTCCTGAGGAAAATCTGTTGGTACCTAGTTCTAGCACCATGAT<br>CCCATGCAGTCAAGCCTTC    |
| 46773772 F 0-61:A>G-61:A>G | TGCAGTCTTCCAACCTCAAAGCTTCTTATCTATGATTTTCTAGCAATGGG<br>CAGCTTAGATGATTTCTTG  |
| 39719807 F 0-10:A>T-10:A>T | TGCAGATTGGAATGAATAAAAAGGCTGGAGAGCAGTTAC                                    |
| 39716065 F 0-16:C>T-16:C>T | TGCAGCCTGTTCCCCACATAATAACTCCTACTTTGATGATCAATCGTGCA<br>AGTAAGATATTCTTACCAA  |
| 39722513 F 0-9:G>A-9:G>A   | TGCAGCATCGACTTCTCTCGGTGATGTTTCTGGAATGGAAGATTGTAATC<br>AATATCCCAAGTTTGTATA  |
| 39728287 F 0-23:G>A-23:G>A | TGCAGCTCGCAGCGATCACTTCGGAGGAGCTTGTTGAAGATCCTTTGAA<br>ATCGGCAGAGCAGTCCAAGC  |
| 46776614 F 0-35:C>A-35:C>A | TGCAGAAAAAACTGAAGCTGAATTTTGTAGCAAGCACCAAAATCCAGA<br>ACAAGCTGTACTTAC        |
| 39720470 F 0-44:A>C-44:A>C | TGCAGGTAAGGACGTAAGGTGACTTTCTCACCAACTGATGACCAATTA<br>C                      |
| 39719995 F 0-27:A>G-27:A>G | TGCAGCATGCAAGAGAGCAAAACTTGCAAATTAC                                         |
| 46756224 F 0-60:C>T-60:C>T | TGCAGGAGAGGCACACTCATTGAAGGTGGAGAAAATTTTATTTTCGAGGG<br>AAGTCCGACTACCAGGATGT |
| 39727797 F 0-15:A>G-15:A>G | TGCAGTATAACAAGGCACAGAACAAGTGAGATATTATATCCTTGTTTCGC<br>AACCTCGGATGCCTGTGGAT |
| 46761052 F 0-46:C>T-46:C>T | TGCAGTCATGGCACCATCACCTATAACTGCAACCACATTGTTCTTTCTTC<br>CCTTAC               |
| 46773536 F 0-17:T>A-17:T>A | TGCAGCAGATCACTGGTTTGGCCAAACAGGCAAGTTTGACACATTCACC<br>ATGTCAACAATGCATTATTT  |
| 39713294 F 0-28:T>C-28:T>C | TGCAGTAGTAAATCTCCAAATGGAAGCTTGAGTTGGCATGCAATACATT<br>CTGAAAGCACTTCAATGTCT  |
| 39727054 F 0-15:C>T-15:C>T | TGCAGTAAAACAAGTCCCGGAAGGTTTATGAAATTAC                                      |
| 39718976 F 0-56:A>T-56:A>T | TGCAGTTTTTATTTGTGGACTCAACATTCTTGCAATCAGTCGTTTTGAAAC<br>TGAGAAAACCTGCTTGGTT |
| 46775797 F 0-35:G>A-35:G>A | TGCAGCTGGACACTTTGAATGAGAAGATAGTTTCTGGTGGTTTAC                              |
| 46757148 F 0-36:G>T-36:G>T | TGCAGTCCACGTATACAGAGGTGGGACACGTGGCATGATCTCAGCAGCA<br>TAAAAGCTAAGCCGCTTCT   |
| 46773722 F 0-49:C>T-49:C>T | TGCAGGTATTTTCATCTTCAAAGACATTGAATCTCCACTTTCATCTATCTCC<br>TTTTCAATCTCAATGGCT |
| 39727780 F 0-47:G>A-47:G>A | TGCAGGTTTTGCAGTCGAAGGATCTTCTGGTGGCAATCCAAGCCTCCGTC<br>TTCTTTCTGCCTGTGAAGA  |
| 39713451 F 0-12:A>G-12:A>G | TGCAGAAAATAAACGACCTATAATTCCAAATTTGGAATTCGACTACCCT<br>GATCAGGATATTCATGAAGA  |
| 39717994 F 0-65:G>A-65:G>A | TGCAGTATTTTGTAAAAGCTACACCTTGCAGGCCAAAGACGAAGATCGA<br>AAAATCTATAGCGCCCGAAG  |
| 39721858 F 0-10:G>T-10:G>T | TGCAGAGGATGGACGCATAGGCCAAAAGACAGGCATATACACATCTGTC<br>ATATACGTACACTCAACCAA  |

|                            |                                                                            |
|----------------------------|----------------------------------------------------------------------------|
| 46755855 F 0-60:T>C-60:T>C | TGCAGCTCTGATTCTTTCAGCATAGGCCCTCAGTTTCTTGATCGTTGGAA<br>CAGTCTCCAATGAGTCCCT  |
| 46756762 F 0-65:T>C-65:T>C | TGCAGGTCTTTGAAAGATGTCAAAGGCTACATATTCAGTGTCTCATC<br>AAAGAAGCTTTTGGATGCT     |
| 46772914 F 0-7:G>A-7:G>A   | TGCAGCAGCAGTATGATCTGGAAAGAAAGAGATTTAC                                      |
| 39721828 F 0-21:A>G-21:A>G | TGCAGAGCTTCCATCACCATCAGGCTCCTTCTCAAAGTGTTGGTTTGCAG<br>TAGCAAAAGCTATATCTTC  |
| 39718395 F 0-48:C>T-48:C>T | TGCAGTGGAGCTCAATGGCGTGCTTTATGCAACAGGGGGTTTGATGGC<br>AGTGACTATTTGAAGTAAGA   |
| 39727816 F 0-67:T>G-67:T>G | TGCAGTCATAAAAAGCTAAAACAAAATAACGAGAGGTAATCAGGATTAC<br>AAGGACAGACAATCATAATC  |
| 39728884 F 0-64:C>T-64:C>T | TGCAGGACATGTGCTGTTGTAATCCTGAATATGATGGTCTAATATT<br>GGTTCGTTCTCCTTCCCTC      |
| 39720539 F 0-17:C>T-17:C>T | TGCAGGTTGCTGAATTTCTTGTTTTAC                                                |
| 39726288 F 0-40:C>T-40:C>T | TGCAGCTGATCCCAAGTTACTTGTATCTAAAATCGTATCGCAACACAG<br>TTCCTGTGCCAAGGCATTG    |
| 46755273 F 0-43:A>C-43:A>C | TGCAGCAGTCTGCCAATTCCAGAAGGTCAAAGAACAAATAGTCATTGCC<br>ATACAACCTTCAGAAGCTCAC |
| 39713452 F 0-55:A>C-55:A>C | TGCAGAAAATACCATGTCTACTTCAATCTATGCATTTCAATCATATAACT<br>TTTATAGGCTGGTTGTAAG  |
| 39716966 F 0-61:C>T-61:C>T | TGCAGGATATGGATCGAGTTTTAGCTGGCCAGTATGTTTCTTGCCATTT<br>CTCTATTGCTGCTTTTTTA   |
| 39717046 F 0-41:T>G-41:T>G | TGCAGGCAAGAATTCAGTCAGTTTTCTTTGAATGAAAATCTGAAGATTG<br>ATCATCAGCTTGAACCAGA   |
| 39723251 F 0-25:T>C-25:T>C | TGCAGGATCTATTGCCCTTCATGGATGGAGGTCCAAAGGATCATCATGTC<br>ACCTTATCTCATAAACGTC  |
| 39729344 F 0-52:A>G-52:A>G | TGCAGATCAGAACTTCAACACCAACTTAGATTTCCAGCCCATAAAGAA<br>ATGAGCATTTTGATTTTACA   |
| 39727682 F 0-50:A>T-50:A>T | TGCAGGACTCAAGAGCTGTTTCGATTTTTTGATCGTCGGGTCAGTTATTCA<br>ATCTTTCTTCATGTGTTT  |
| 39717153 F 0-55:C>A-55:C>A | TGCAGGCCTTTGCTCGTATATTTGGGTCTTCATGTGAAAGGAATTCCTTT<br>AGGAACTCCAAAATAGATG  |
| 39715342 F 0-29:T>C-29:T>C | TGCAGCAAGCTGATGAAAAGGAAAATGGATTTACAATCAGGTAGTAGGA<br>TCGAAGGAAAAGGGAAATAG  |
| 39717643 F 0-34:G>T-34:G>T | TGCAGGTTGAAGCAGCTGTTTTGTACCCGGGCGCGCTCCTACTGTGCTT<br>AGAATCCGCATGAGGTTTG   |
| 39724602 F 0-46:G>C-46:G>C | TGCAGAAATAGGATGGTGGTGTTCGCTATCCGCCATTTCTAAGCAGCTG<br>CAATTAC               |
| 39716555 F 0-9:G>A-9:G>A   | TGCAGCTTCGTTTGGCATAAGCACAATATTGCTGGAAAAATATATCACCC<br>AGCCAAGGCACATAGAAGT  |
| 39718636 F 0-29:G>T-29:G>T | TGCAGTTCAGTTCAGAGGGCTGTCTGGAGCCATCACCTGCTAAAGTTCC<br>AGCACCGTAGGGGCTCCCG   |
| 39720858 F 0-17:C>T-17:C>T | TGCAGTTGCTGCCGTAACATTGCTGCTTCCCTTTGCCAGTACTAATGATT<br>AC                   |
| 39719465 F 0-19:G>A-19:G>A | TGCAGAATGATGCACGCACGAGCATGTCATTTAC                                         |
| 39722303 F 0-44:T>G-44:T>G | TGCAGCAAGTTTATTCTGGGCATTCCTCTCAAAGAGAACTTTCTCAGCA<br>CATGGTACTGATGGCTTCC   |
| 39714198 F 0-68:C>T-68:C>T | TGCAGACCCAGCAAACATCCCATTCACTCCAAAAGGAAAGTATCTACAA<br>GAACATGAGAAAGCAAAAAC  |
| 39713903 F 0-12:A>G-12:A>G | TGCAGAAGGTCCATGTAGAAACACTCTGGCAACCTTGACAGCAGGATTAC<br>AAACAATTTTTCCAATATGA |
| 39714431 F 0-59:A>C-59:A>C | TGCAGAGAGTAGACAAGTCAGCAGGAGTACACTCATTACTTTTTAGCTT<br>CTCCTCAGCAGTTGTTTCA   |
| 39713308 F 0-56:C>A-56:C>A | TGCAGATCTCCATCCCCAAACCATGACTGGACGACAAGAACAAAGCCGA<br>GATAGAGCAAGAGTGAAAAA  |

|                            |                                                                            |
|----------------------------|----------------------------------------------------------------------------|
| 39716503 F 0-5:T>C-5:T>C   | TGCAGTTGTGAATCAAATTCTACTTTCCATTCAAGAGGAAGCTGCTTTCA<br>GCTGACACTTTGAAAAAAA  |
| 39728526 F 0-9:T>C-9:T>C   | TGCAGACGTTTCAGATACATTGACTGTCTTCTACGAAGGTCCATAGAAAG<br>ATTCTGAAGCTCTGTAGCA  |
| 39713498 F 0-15:A>G-15:A>G | TGCAGAAACATGCTCAATGAGCCTGCTGGTACCTCCTCAGTCGTTCCACT<br>TATAGGGACTTGTGGTAAG  |
| 39714730 F 0-19:G>T-19:G>T | TGCAGATAAAGGGTAGAAGGGGATCAGGTGCAGATCCATGTTTATTTCC<br>CCTGCTCTTTGTTGTCAGCT  |
| 39725094 F 0-18:A>C-18:A>C | TGCAGGCAAAGGTCTAGCAAACATTCCAAAATCTGTTGCCTTAC                               |
| 39724334 F 0-45:A>G-45:A>G | TGCAGTTGCCAACTCTACCCAGCACCCAATTCCATAAGGAGATCACCTG<br>CAAAACGTAGCTGCAACCA   |
| 46760941 F 0-10:C>A-10:C>A | TGCAGGAAATCAACTTATGCGGTTGCTGTTAC                                           |
| 39715828 F 0-58:G>A-58:G>A | TGCAGCCAATGCTAACTGCATGTGATCGATAAAGGTTGAATTAGATAGTA<br>CATAATAAAGTTATCAAATT |
| 39728072 F 0-41:T>C-41:T>C | TGCAGGTATCGTGACCCAAAAACAGGGTTACCTTATGCAACTAAAGAAG<br>CTTTTAC               |
| 39716122 F 0-6:G>T-6:G>T   | TGCAGCGATAATCTGCTCGTGGAGAATATTACTTTAGATATCTTGGTGCC<br>GTCCAATAGAATTAGGTGA  |
| 39714199 F 0-26:G>T-26:G>T | TGCAGACCCAGTGGCATCAGAGAACAGCATACCTTTGTCCCCTCAATGG<br>CTATATGCCAAGCCAAGTGA  |
| 39724760 F 0-39:A>G-39:A>G | TGCAGAGGGCACAATCTGTTTCAGGACACTTCCACCAAGACATATTTTAC                         |
| 46755252 F 0-52:C>G-52:C>G | TGCAGCAGGGGAAGGATTTGGATTTCAAAATTGGAGGCAAAATCGGAGA<br>AGCCAACGAGGTAATGGAAG  |
| 46774035 F 0-29:T>G-29:T>G | TGCAGAAGGAAATGTTGGAGAAGGTGGGGTTTTTAC                                       |
| 46775267 F 0-7:G>A-7:G>A   | TGCAGAGGAECTTCTTGTCTCCATTAC                                                |
| 39721173 F 0-44:A>T-44:A>T | TGCAGAAACCATTGAAACTATTTCCACAGTTGTGTACCCAGCTAATTATG<br>GGACCAATAAGTTGCGGCT  |
| 39723486 F 0-40:A>G-40:A>G | TGCAGGGGACAAGATCACATGAGGAACAGGAGATAGAGAAATAGATGA<br>GGAAATGATAAAGAGAGTACA  |
| 46754306 F 0-31:G>A-31:G>A | TGCAGAGACGGGATCTACCTTCACTAATCCAGGGCCAATAGCAGCTGAA<br>GTACCTAAATTTCTCCAGA   |
| 39719672 F 0-38:T>C-38:T>C | TGCAGATAACAATTACTTATTCACAAATCAGTTTACAGTCATCAGATTTT<br>AAATTAC              |
| 39719938 F 0-27:C>T-27:C>T | TGCAGCAGATATCTGGAGCGTATCCATCCCTTTTCATTTTAC                                 |
| 46771749 F 0-37:G>A-37:G>A | TGCAGAGAAGTGCAAGAAAGGAACATCAAACAGCCCAGCCGCCAAAGA<br>AACGAGTAGCTCCTGTGCTC   |
| 39714006 F 0-36:G>C-36:G>C | TGCAGAATCCTTCAACTCCCCTTCAGACCTTTGACAGCGGAAAACATATA<br>TTGATATGATAGCCAGTAA  |
| 39727224 F 0-6:C>T-6:C>T   | TGCAGTCTCGATGATGCTTCGTTCAACAGATTTGTGCGTGGTTTAC                             |
| 39715231 F 0-28:T>A-28:T>A | TGCAGCAAAGTCACAACTCAGTAAGACTTTACAGATTAGAAATTCTTG<br>TTTCAAATAGTCTTTTCTT    |
| 39723551 F 0-48:T>A-48:T>A | TGCAGGTAATGTTCTTATTCCCTTGTGAAATGGTATAGATAATAAGCTA<br>TGTGGCTTGAAAGGGCAAA   |
| 39713710 F 0-33:T>A-33:T>A | TGCAGAACCGATTCCATATGCTAATGTAAAACTGTTGTCATAGTATTGA<br>AGCTGTTCAAAAAACCAA    |
| 39725926 F 0-20:T>C-20:T>C | TGCAGATTGTCAAAGTAACTATTCACGATGGTACTCTAAATAATAAA<br>AATGAATGGAATAACAATTA    |
| 39714124 F 0-31:C>T-31:C>T | TGCAGACAAGGTGACAGATCCTAAGATTAGTCGTTTTCTATACGAGAAG<br>GCGTCGAGCAAGGACAAGAC  |
| 39715049 F 0-63:T>G-63:T>G | TGCAGATGTGAAGAAGAAAACCTTGATGTTATTTGATATAATATTTCTGA<br>AAGATCAAGCTTCTGCTCA  |

|                            |                                                                         |
|----------------------------|-------------------------------------------------------------------------|
| 39720600 F 0-42:A>G-42:A>G | TGCAGTAGAACAACTGCTGCTTGCCAGTTTTTCAAAGAAAGAAACCCT TAC                    |
| 46757083 F 0-34:T>C-34:T>C | TGCAGTATTATATGAGGACAGGAATGTGCAAATTTGGTGCTTCCTGTAAG TATCACCATCCTCAGCAGG  |
| 39720230 F 0-10:T>C-10:T>C | TGCAGCTTCTTCCAAGGGAGAAGAGAAAGCAGGAATATCAGGAGGCTGT TAC                   |
| 39715670 F 0-51:A>T-51:A>T | TGCAGCATATATGTTTTGAGCTGCAATAAAAAGTCAAGCATAGTCAATA TCAACTAGCAGAGAAATAAA  |
| 39728122 F 0-9:T>A-9:T>A   | TGCAGAAAATCATCGAGTGTATCGAAGCTTGAAAGCTTATACAGAGTTA CCAAGTTTTTGGCAGGGCAA  |
| 39727604 F 0-50:C>T-50:C>T | TGCAGCCTGAAGCCTGTTATGATTTTTTCTTCTTCTTTGGTTCACCTTC CTTCTATTATGCTCTTGC    |
| 39723942 F 0-17:C>T-17:C>T | TGCAGTCCCAACTTCTGCATTTCTGTGAGGAACAATCGGCATTCTCCGGGT CTTTTGATCCAATAACA   |
| 39713818 F 0-12:A>G-12:A>G | TGCAGAAGATCTAAGACAGAGAATAATCGAACATGTAAGTATCTGTATA TCCCTGGACTAACTTAGTT   |
| 39720346 F 0-26:C>G-26:C>G | TGCAGGATATTTCTTCTATTTATTTTCATCAATTTCTTTTAC                              |
| 39724657 F 0-18:T>G-18:T>G | TGCAGAAGTTGAACTTAGTGCAGAAGTGTTCTTAC                                     |
| 39714411 F 0-37:T>C-37:T>C | TGCAGAGAGAATGCCAGACAGAGATATGGTTCAGGATTTGCTCATAAGT TACATGGATGGTACATGCTA  |
| 39716258 F 0-41:G>C-41:G>C | TGCAGCTACCTGGTGTTCTGGATGATTTGTTCTCATATGAAGGTCCTCTA GGTGCAGTTTACTCAAAAAG |
| 39721816 F 0-68:C>T-68:C>T | TGCAGAGCTATTGTCTTAGAACCTGGGAATCCATCTATGAAGAATCAAA TAAAGGCATTAGCTGTGCC   |
| 39715680 F 0-8:G>A-8:G>A   | TGCAGCATGTTTTGCTAACTCAACATTGCCAAAACTCTACATGCACTAA GCAAGCTCCTCCATACTAA   |
| 39722945 F 0-14:C>T-14:C>T | TGCAGCTGAGGATGCAGCAGAAAGGGAAAGTGACACTACCAGTGATTCT GAGGCTAAGACATTGAAGCA  |
| 39727054 F 0-5:C>T-5:C>T   | TGCAGCAAAACAAGTCCCGGAAGGTTTATGAAATTAC                                   |
| 39716421 F 0-54:C>T-54:C>T | TGCAGCTGCACGAGCTTTCTGGGCAGCCGCAGGATCATCAAACCTGATA TAACCCGACTCCTCTCCGAT  |
| 39720479 F 0-23:G>C-23:G>C | TGCAGGTAGAGTTTCACGGACTCGAGCTTAC                                         |
| 39724891 F 0-18:T>C-18:T>C | TGCAGCACATTCTTCATGTCTCCTGCGTTCATAATTGTCCCTCATGTATTAC                    |
| 39716110 F 0-9:T>C-9:T>C   | TGCAGCGACTAGCAGTTATAATGATTTGACGGTCGTTTCGAGTAGTGATC GGGGGAATGTAGACCAGTT  |
| 39719817 F 0-44:T>A-44:T>A | TGCAGATTTTCAGTCCGACTCTTCTTGTGTGGTTTTTTCATTCTTTTATTTTT TAC               |
| 39721049 F 0-40:G>A-40:G>A | TGCAGCACATCAGGCCATACTTGCGGATCAATCCATGGGGGTTACCGCA GACTCGGCTGGAAAATAACA  |
| 39715719 F 0-33:C>T-33:C>T | TGCAGCATCTGGGGGCACTTCAGTTCTCAGAGACGCTCGACAGCCTAGC CCATGGAATTAGAGGTCGTC  |
| 39714745 F 0-23:G>T-23:G>T | TGCAGATAAGGAGAAACCAACTGTGATCTTCAATCACCAAGGAAAAGG CAAATGGAGCAAGGAATAAG   |
| 39714956 F 0-38:C>T-38:C>T | TGCAGATGACTAAGAGGGATCTTCAATAATCTATCTCACACCCTGGCGA GCAGTGGCACGTCCAAGTCC  |
| 39722855 F 0-14:G>C-14:G>C | TGCAGCTACCTCTGGCTTTCTCATATCTGCAAGACCAAGCAAAATAATCA ACAAATATTTGTTATTTT   |
| 39722080 F 0-39:T>C-39:T>C | TGCAGATGCATGTGCAAGGAATAGTCATTTTATTGAGGTTGGATTTCCAT ACAAGAGAAGATTTTCTGA  |
| 39718465 F 0-24:A>T-24:A>T | TGCAGTGAAAATCTAATACTAGTACCATAACCAATACGATATAGATC TTTACAGAACAATAATCTT     |
| 39716763 F 0-62:G>C-62:G>C | TGCAGGAACATAATATGTTTCATGGTGGCTTCGTCTGGCAAGACAACAT CAAAGCCCTGAAGAAAGAA   |



|                            |                                                                        |
|----------------------------|------------------------------------------------------------------------|
| 39721368 F 0-13:T>A-13:T>A | TGCAGAAGATGCATTTACTATAACAACCAAGAACTCACGACTGAAGCGTAGATAGACAACACAACAGCTG |
| 39715220 F 0-44:G>A-44:G>A | TGCAGCAAAAACGTGTATAGTTTATGTCTGAAAGATGTTTCAATGATAATGTCATATCACTGCAAAATT  |
| 46756843 F 0-38:G>A-38:G>A | TGCAGGTTCCGCCAGCGAGCAGCCGTGGTGGTCTCTACGCAGAATTTGTTGACCAGATCTCTCTGCCGG  |
| 39716813 F 0-54:A>G-54:A>G | TGCAGGAATCTCAAACCTCAGCAGGGACATTAGCAGCAATTGTGAGCACATTGGAACCTGGTTATTTTGT |
| 39724376 F 0-54:T>C-54:T>C | TGCAGTTGTCCGGCTTATGGGGCGTGCTGCTTACACATCACTCTAGAGTGTGCTTTGCAGACTCATCC   |
| 39727305 F 0-39:T>C-39:T>C | TGCAGAAAGTTTAGTATAAGAAGATATCGAGCATCATAATTCATGGCTCTTGACGTAAGCATCTGTAA   |
| 39714179 F 0-48:C>T-48:C>T | TGCAGACATTTATGTTATAAATCCCAGGTGATCTATTTTGAAGAACCGCTCATGTAAAAGCAGTAGT    |
| 39725412 F 0-47:C>T-47:C>T | TGCAGTTTGGTTTGTAGTCAGTGCCTAACAGTACAGATCTGAATGTCTTAC                    |
| 39721922 F 0-17:C>T-17:C>T | TGCAGAGTGGCTCCTTGCTAGTTACAGATTTTGAATAACAAAACATAAATCACCAAATCACTACTTTC   |
| 39727081 F 0-30:T>C-30:T>C | TGCAGCATTCAAATACTCAAATAAATTCATGGCTTTGTTTATTAC                          |
| 39720328 F 0-8:G>C-8:G>C   | TGCAGGAGGCTCCATCTTGGGCTCCTCCTCGTTCTTAC                                 |
| 39718408 F 0-47:A>C-47:A>C | TGCAGTGGATTTCTTGGAACTGTGGAAGGTACTGCCAAACTTATCAGAGAACTCTATGTATATCTTCTT  |
| 39727146 F 0-6:G>A-6:G>A   | TGCAGGGTTGGAAAAAGGCACTGGTTCAGTTAC                                      |
| 39721598 F 0-65:G>A-65:G>A | TGCAGACATTGTCAGTGCCAATACTGATAGTATGTCTGCCAAGTATTTCTGCAATTGAGATGCAAGTAG  |
| 39725202 F 0-27:T>A-27:T>A | TGCAGGTTGTAATCTCTTTCCGTTTCTTAGCAATAATTTATATAAGAAATTAC                  |
| 39715552 F 0-33:G>A-33:G>A | TGCAGCAGCCATCGGAGTCATCGGTGAGGTGGGAACTCGCATATGCATGGATAAAAGTCTGTGGTTT    |
| 39717476 F 0-65:A>G-65:A>G | TGCAGGTATGATGTCTGCATTTTTTGCCCCACAAAAGCTGAAATTTACAATAACATTTTGGTAAATGG   |
| 39719973 F 0-5:T>C-5:T>C   | TGCAGTAGTCTCCAACCAGGTAAAAATGTTTTTCTGCATCAAGAAAATCTTAC                  |
| 39719948 F 0-7:G>A-7:G>A   | TGCAGCAGCATTATAAATGAAACAACCTTTGATAAAGTTTAGGTCTAGTGCCTTAC               |
| 39714933 F 0-18:G>C-18:G>C | TGCAGATCTTCAACGCTTGCAGAATGTCCGACAAATGGAGCATTATCAACATTCCATGAAGTGCCAGAT  |
| 39728494 F 0-18:A>C-18:A>C | TGCAGTGATGTCGTTGTTATTGGTATTTTCGTTGCTTGTGTTTAC                          |
| 39719431 F 0-32:C>T-32:C>T | TGCAGAAGTGGACCATAGTCAAATTAGATTCACCTAATGGAATAAATTTAC                    |
| 39715064 F 0-12:G>A-12:G>A | TGCAGATGTTTTCGAAAATTCGGGTTGGAAAGCTAACTCCATATGGGATAGAACTCTCAGAAATATAGA  |
| 39721224 F 0-7:A>G-7:A>G   | TGCAGAAATATGAGATATATTGTTATTCCATTCAACTGAGACTATAAGCTGTTTTCATCTTTTTCATTA  |
| 39729510 F 0-9:A>G-9:A>G   | TGCAGTTCTAGTTGATTCATATATGAATTGCCAGATAATTTCTATCAAGAGAAGGATCATTAC        |
| 39725149 F 0-21:T>A-21:T>A | TGCAGGGTGCAGTTCGGAGGCTTGTGTATATATAGAGATTAC                             |
| 39727471 F 0-33:T>A-33:T>A | TGCAGATATCTTCTTCTCATCTGATCCTTTTACTGCTACCTCAAATATTTCTCCAGTTCTGCTAAGCT   |
| 46756740 F 0-52:A>T-52:A>T | TGCAGGTCATTGAGCCTTGTCAAGTGTGTCTTACGCCAACTTTACCTGAAATCAAAGAAATTCACA     |
| 39725167 F 0-13:C>A-13:C>A | TGCAGGTATAATGCTTATGTACAAACTTGTGTGATTAC                                 |

|                            |                                                                            |
|----------------------------|----------------------------------------------------------------------------|
| 39718451 F 0-45:C>T-45:C>T | TGCAGTGGTAGAAGACATATACAGACGAAGGCAGCCACTGCCATCCATG<br>GATGCTATCTATTTTCCTCA  |
| 39720445 F 0-15:C>T-15:C>T | TGCAGGGCCCAAATACCAGATATATTTCTAGGAAAAATGTTTGTAC                             |
| 39726516 F 0-11:A>T-11:A>T | TGCAGGTAGTTATGGACAATGGTATATTGCAAGTGACACTGTCCAAGCC<br>AGATGGAAATGTTACTGGGA  |
| 39717203 F 0-49:A>G-49:A>G | TGCAGGCTGCTTTATGTGGTCTCTTGGTTCTTATGCAATCAAGGGTTA<br>GCAAGGTTTATCCATGTCA    |
| 39728506 F 0-8:G>A-8:G>A   | TGCAGAAAGTAATTGTGAAAGTGATGAGAACATTATAAAACCACACTTG<br>ACTTTGAAGAAGATTTTTAC  |
| 39724959 F 0-10:A>G-10:A>G | TGCAGCCATTACTGGTACAAGAAGACCAATCTTTAC                                       |
| 39718894 F 0-20:G>C-20:G>C | TGCAGTTTCTTCTGCTTCCTGATCAATATAATCTTCACCTACAACCTTTG<br>GCTAAGTTGCAACTTCCT   |
| 46764323 F 0-32:T>A-32:T>A | TGCAGGACTCACCAAATATACATAGATCACATGGGAGCAAGCTGATTC<br>TTGTAATAAAGCTGCTGAT    |
| 39718262 F 0-67:A>T-67:A>T | TGCAGTGACAAGTCCAGATGTTACCACTTAGACCAAATAATAGACATG<br>ATAGATAAATGAGTTCCAAC   |
| 39728044 F 0-50:A>G-50:A>G | TGCAGGACGAGCAACTAATAATTACACCACAACACAATGCTATGAGCTG<br>AAAGGCTTAC            |
| 39726938 F 0-12:C>A-12:C>A | TGCAGAAACGTTCTCGCCAGCACCTGTCTTTCTAAAATCTTAC                                |
| 39728526 F 0-25:G>A-25:G>A | TGCAGACGTTTCAGATACATTGACTGTCTTCTACGAAGGTCCATAGAAAG<br>ATTCTGAAGCTCTGTAGCA  |
| 39714463 F 0-13:G>T-13:G>T | TGCAGAGATGGGGGTTCATACATTCTTTCCATGCAAGACTTCATGTCTAA<br>ATAAGTGCGTTTTTGATGT  |
| 39717346 F 0-17:G>A-17:G>A | TGCAGGGGCCAATCAATGTAGTATTCAAGAGCAACACCATCCCAGCCAT<br>CAAGAGACATATCTGAAGAC  |
| 39719483 F 0-11:G>A-11:G>A | TGCAGAATTGGGAAAAATGGGCAATTTTTAC                                            |
| 39718573 F 0-15:G>A-15:G>A | TGCAGTTATAATCACGTTGAAATCGCCATCAATGCCGATGGTCCCATGG<br>CCGACTCCAGAGCTTCTCT   |
| 39717211 F 0-47:T>A-47:T>A | TGCAGGCTGTTCAAGGTCAATGGGCAGCCTATATTTATTTCGTGGTGGTAA<br>TTGGATATTGTCTGATGGG |
| 39715658 F 0-10:A>C-10:A>C | TGCAGCATAACAAGTTCCCATTCCTAAACCCAAGATAGATGAGGTTTT<br>GGTAAAAGTGGAAGCAGTTA   |
| 39722845 F 0-33:C>T-33:C>T | TGCAGCTACAGTGGTGTTCACAATATGCATTACACTCTGCCTCCTGGT<br>CAATAAGCATCCTTCCCGA    |
| 39727360 F 0-58:T>C-58:T>C | TGCAGAAGAGGCATAAAAAGCCATGCTGTTCTCTAATTGTTTGACATTATT<br>TTGCTGCCTTTCTTGACA  |
| 39724105 F 0-64:A>T-64:A>T | TGCAGTGGACTTCTTCATCGGAATCAAATGCACAAGGACATTCAAGTGTT<br>TCAGCTGAAAAGATAGATG  |
| 39715678 F 0-67:G>A-67:G>A | TGCAGCATATTCATTTGTACATGTTTAGAACAAGATCCTAAATAATGATG<br>AAAATGGTGGGAGTACTGT  |
| 39713268 F 0-63:C>T-63:C>T | TGCAGAGACCTTCTGAGGTACGTTCTTATTTGGATTTGGGTAAATTTGA<br>AAACGATTACTGACCCTAT   |
| 39715385 F 0-21:C>T-21:C>T | TGCAGCAATGGATCCAAGAAACAAAATTGGTAGCTCAGGCTTGTTCAGG<br>GAAGCTAATCGAGTAATTGA  |
| 39720061 F 0-20:A>G-20:A>G | TGCAGCCTAAGCTAGCTAACAGCAGCTTAC                                             |
| 39720874 F 0-27:C>G-27:C>G | TGCAGTTGTTGCGGACTCTCAAGGTGTCAAGGTAATTAC                                    |
| 39720003 F 0-41:T>C-41:T>C | TGCAGCATTGGCAGAAAAATATGCCTGGAAGAAGTGACAGTTATAAGCT<br>CAAATTTTAC            |
| 39714181 F 0-13:C>T-13:C>T | TGCAGACATTTGTCGAGGTGGAACCTGATGAGCTAAGTAGGAGGACTAC<br>TGTAAGATCAGGCTCCAGCC  |
| 39717619 F 0-43:G>C-43:G>C | TGCAGGTTCCAAGATGCTCCTCTTCTCCTCAAACATATCCTACGATATGA<br>GAACAAATATCAAAAACCT  |

|                            |                                                                          |
|----------------------------|--------------------------------------------------------------------------|
| 39713333 F 0-30:A>G-30:A>G | TGCAGCCTTCTCACCTAATTCTGTGTCACCATGAATTCGGCTTGCACCAA GTAAAGCACCCCAAGTTGC   |
| 39717951 F 0-65:G>A-65:G>A | TGCAGTATGATTTCCCGAAGCAGGAGACCGTTATACAATTTGTCATTGAT GCCATTCAGGCTGAAGCTT   |
| 39719849 F 0-26:A>G-26:A>G | TGCAGCAAATAAGAAAAATCATTGAAAGAAGTGGCTAGTTAC                               |
| 39723635 F 0-33:G>T-33:G>T | TGCAGGTGGAATCAACTATTGAGTATATTTGTCGTCATGAAGGTCACGGT GCTATTCTTGTATTCTTA    |
| 39722185 F 0-45:T>C-45:T>C | TGCAGATTGGCATGGAAAACCTTGAGTCAAGTGGTTTCTCTAAGAATCTG AAAAGAAAAATGTAATTATA  |
| 39726612 F 0-54:T>A-54:T>A | TGCAGTAGCATTCAAAGGCTCTTCTTCTTTCATCAAGAGTTCCGAAATT GGAATAATCCGGAACGGAA    |
| 39728994 F 0-18:T>C-18:T>C | TGCAGATCTCATTGCCGGTTAGACCTGCTTCAAAGGCAGAGCAAATGAG AGAATGCTTGCATCTTTAC    |
| 46761047 F 0-14:T>G-14:T>G | TGCAGTCAATTAACCTTTTGACCAAAAAACATTAC                                      |
| 39715273 F 0-20:C>T-20:C>T | TGCAGCAAATTACTCACTCGCTCTGAGAGATTATGGACCTCAGCAGCAC GAGATCTTTTTGTAGAGGTT   |
| 39716532 F 0-49:A>T-49:A>T | TGCAGCTTATAATTTTGTGTCCATTGCAACTGATCTTTACCGAAGTTACA GCTGCTGAATGATCAACAA   |
| 39717022 F 0-30:G>C-30:G>C | TGCAGGATTCTCTTTTTCTTTTTTTGCTTTGCAAGGGCAGGAATACAATAT TGCGGATAAGTATAAATC   |
| 39720394 F 0-25:G>A-25:G>A | TGCAGGCATTGAGGAGCAAGCTGAGGGAGATGGGGATGTTAC                               |
| 39714672 F 0-59:T>C-59:T>C | TGCAGAGTCTCGTGCTTCAAGACAGCATTATCCGAAATTTGGTGAAGAT CCATGTAGATCGTCCATTT    |
| 39714642 F 0-51:T>C-51:T>C | TGCAGAGTACAGATTGTACGACCCGAAACACGAAACGGCAGAGACATCT AATAAGCTTTTTCACAACAAC  |
| 39722086 F 0-36:T>C-36:T>C | TGCAGATGCCCTTTCTGCCCTTGAAAATATGATCCTGAATATTTTGCAA GCTATGCTGTAGAGAAGTT    |
| 39721114 F 0-37:A>G-37:A>G | TGCAGAAAAATTTACCTTTTCAAATTAGCTTTCAGTGAATATCCACAGTA TCAGCTATTTGCTCTTAGT   |
| 39714137 F 0-37:G>A-37:G>A | TGCAGACAATTTACTCTGCTCGGAGGCAGTGGGTCCGGTGTATTTGCGG GACACTTTTTTTGCTGAAA    |
| 39718729 F 0-39:T>C-39:T>C | TGCAGTTGAGTGCTGTATTGTCAAGAACAACCTATTTTCTTGACCCTCTCT CTTTGTTTATTTGATTCT   |
| 39721928 F 0-8:C>A-8:C>A   | TGCAGATACAAACCAACAAAACACTACATTCAGTAATTGCCAAGAAACCCA TAACGCAAACACTACCAGCA |
| 39727759 F 0-8:T>A-8:T>A   | TGCAGGTCTTATGACTGCGAAAGTTGTTTGTCTCATTGAATCACTACTTG AATACAGGTATCTGTTTCG   |
| 39717650 F 0-58:T>G-58:T>G | TGCAGGTTGCTGACTCATGGGACGCGCTCGATGGATGGCTCGACGCAAT AAGATTAGTTTACACAATCT   |
| 39719356 F 0-35:C>T-35:C>T | TGCAGAACAGTCCATGGGGCGTGAAGCTTGAGGACCCAGATGTTAC                           |
| 39717626 F 0-58:A>G-58:A>G | TGCAGGTTCTCAAACAACATTCTAGAAAAATCTGTTGATTATCAAATCAT TTCTCCACAGGAGCTCGCA   |
| 39724997 F 0-25:G>A-25:G>A | TGCAGCTAGATTTCCCTTTTGTGTTTTAC                                            |
| 39724921 F 0-18:C>T-18:C>T | TGCAGCAGTTCCACATCACCTAGCTCTTCTGTTTAC                                     |
| 46754114 F 0-27:A>G-27:A>G | TGCAGACAAACTAATAGAATAGATAGTATTGCCATCATCTGATACAATA AACTCCATCAACACTAAGAA   |
| 39720330 F 0-15:G>A-15:G>A | TGCAGGAGGTCGACCGGTTTGATGATTTAC                                           |
| 39721584 F 0-46:A>C-46:A>C | TGCAGACAGTTATACCCCTTACATTTCCGGTATTTACTTTTATGTACTCG AATCGTCGCCGTGTAGTA    |
| 39718530 F 0-32:G>T-32:G>T | TGCAGTGTGTTGCTCAGGAAGAAAACAACATGCATTTGGTGGCTCAGG ATTTTCAGAGATTGGTGAGA    |

|                            |                                                                                                                                 |
|----------------------------|---------------------------------------------------------------------------------------------------------------------------------|
| 39715073 F 0-35:G>T-35:G>T | TGCAGATTAGA A C T T C T C A T G A T G A C C C C T C T G A A G T G G A G G A T C A A A G A T T C T C T A C T A G T G G C A A T C |
| 46764836 F 0-12:C>T-12:C>T | TGCAGTAA C G G T C C T A G A C G G C A A G C A G C T A C G A G A C A T C C A C C T C T C C G C C G T T C C G A T G C T G C      |
| 39717284 F 0-50:G>T-50:G>T | TGCAGGGATGCCATATCTTCCAATTCGATTCCAGCATTCCGTAGAGGTATGTCCTAGTGGGTTTCATAT                                                           |
| 39719502 F 0-5:A>G-5:A>G   | TGCAGACAGCTCAAATTCATCATGTTAC                                                                                                    |
| 39715388 F 0-62:T>C-62:T>C | TGCAGCAATGTATATAGGAGTATTTGATGGGTATCCAAGAGCGTTTAGAAAATTCCGACCTTTTTTGG                                                            |
| 39719923 F 0-5:C>T-5:C>T   | TGCAGCACCTTATTGTTGGCTGGACCGATGCATCGAGGCGTTTTAC                                                                                  |
| 39727148 F 0-30:A>G-30:A>G | TGCAGGCAACAAGGGCCCCAAAATTGTCTCACAAAGAAGTTCATCATCGGAATTAC                                                                        |
| 39714795 F 0-67:T>A-67:T>A | TGCAGATAGTAAAGTGCCTATTATCATGGTTGGTCTGGAAGTGGATTGGCTCCTTTCAGAGGTTTCTT                                                            |
| 39723613 F 0-10:G>A-10:G>A | TGCAGGTGAAGGATGCCATTTTCAGGACGCTCATTCCGGAATGGAATGTTTGATAATGCACACATCCGAT                                                          |
| 39725072 F 0-29:A>G-29:A>G | TGCAGGACCGGAGGTATTGCTTCTTTCTGAGCTAGCACCTGAACTTAC                                                                                |
| 39719404 F 0-39:G>T-39:G>T | TGCAGAAGCCTGATATGAAAGACATTCATCTATAATAATGGTTAC                                                                                   |
| 39717204 F 0-54:G>T-54:G>T | TGCAGGCTGGCGTCTTCATAGTTCCATGAACTGCATCTGTATGATGTGCTGCTGGCCATTTCTTGGGTG                                                           |
| 46755145 F 0-7:C>T-7:C>T   | TGCAGCACTGCAAAGCTGTGTGCCATTCGAGACCCATTCAGAAGCCCTGCCACACAAAAGTCATTAC                                                             |
| 39726181 F 0-60:G>A-60:G>A | TGCAGCCTTGGAGATGCCGTACGCTGGAAGCATTGTTGTCCATCCATTTGCTTCTAATCTGTCTTCTT                                                            |
| 39717752 F 0-50:G>C-50:G>C | TGCAGTAACTCAACATACCCTGTTTTTCTTTTATCATTTTCTAATAAAAGGAACATTATTCACTCTCCT                                                           |
| 39715029 F 0-66:T>G-66:T>G | TGCAGATGGGCTTCTAGCAGATATCATGAGTAAAAGTAAGTGAAGTGATGTCCTTACTTCATGTGCTAG                                                           |
| 39722463 F 0-55:A>G-55:A>G | TGCAGCAGGACCTGGTCTATCAGAAGAATGTGGAACACTTGACGCCTGTGATTGATTTTTCTTCAGTT                                                            |
| 39722155 F 0-52:C>T-52:C>T | TGCAGATTCATCAACCTCACGCCCCAGAAGTCGCCATCTCTCTCACCGGATCGTCCCTCGCCATTCA                                                             |
| 39722578 F 0-54:G>A-54:G>A | TGCAGCCAAAGAAGCCTCTGTTAGCAGACAAACCAGAAGGATGCGCTGCTTTGAGTATGTGATGCCTT                                                            |
| 39726814 F 0-39:C>A-39:C>A | TGCAGTTGACTATCTAACCTACGGCTCAGTGGATTTGCGCTTTGCTCCCTATGGACCCTTTTGAAGTT                                                            |
| 39716410 F 0-9:T>C-9:T>C   | TGCAGCTGATTTCTTGATCATTCCAAGTAGATTGCAACCCTGTGGTCTCATCCAGTTGCAAGCCATGCC                                                           |
| 39716523 F 0-12:A>G-12:A>G | TGCAGCTTACAGA A C T G A A A T G G A A C T A A A G T T G T C T G C T C T G C T G A C A T A A T T T A T G A T A C C A A A A A A   |
| 39720396 F 0-6:C>T-6:C>T   | TGCAGGCCAGCCTGATAAAGCTGTTAC                                                                                                     |
| 46754973 F 0-38:C>T-38:C>T | TGCAGCAAAATCAACTTGAGGGTCCGATTCCGGGTGAGCTTGAAACTGTTCTAGCCTTCTTGTCTTCA                                                            |
| 39718497 F 0-21:C>T-21:C>T | TGCAGTGTGCCTTGGTTTGTGCAACTAAATAGGCGAGAGGGTCGGTGTCTTCCGGTAAAGCATCAGGC                                                            |
| 39715254 F 0-34:C>A-34:C>A | TGCAGCAAAGAGGAGATTTCGCGGAGAACAGCCGCTCGAGAACGAGGATTTGTGAAGTAAAGACGAAGA                                                           |
| 39714564 F 0-21:T>G-21:T>G | TGCAGAGGAGCCAGGAGGAACTAGAGAAAAACGGCAGGAAAGGGAGCTGGCATTGGAAGAGGAGAGAG                                                            |
| 39717969 F 0-61:A>G-61:A>G | TGCAGTATTCCACATTTTGTGACAGCTGATGACCAGAGTCTAACGGTGGCTCATTACCCTATTCAAAC                                                            |
| 39716449 F 0-49:A>G-49:A>G | TGCAGCTGCTGTTCTCTCCTTGCCTTTTTCTGCACTGCCATTGTCTCAATCTCTCTTCATTGGCCCT                                                             |

|                            |                                                                              |
|----------------------------|------------------------------------------------------------------------------|
| 39714040 F 0-46:A>G-46:A>G | TGCAGAATGCTAGATGTGCAGCGGAGCAGACCCAGACTGTTACGAGAGA<br>GGCTCCTACAATCACTGTTC    |
| 39717371 F 0-58:G>A-58:G>A | TGCAGGGTAATTACAGAAGTTGGTGTGTATTCTATTCTATATATAGAGCC<br>AAAAGGAAGACAGGAATAA    |
| 39727306 F 0-54:T>A-54:T>A | TGCAGAAGCATTGTTGGGGAGCTAGATGAGGAACTTGATTCTAATTTGG<br>ACTTGTTCGAAATTGAGAGCT   |
| 39713893 F 0-28:T>G-28:T>G | TGCAGAAGGGGTAAAAATATGCTTTTGGTATTCTCTTATAATTTACTAAT<br>TTTGCAGAGGTTAGTGA      |
| 39726050 F 0-32:C>T-32:C>T | TGCAGCAGCATCTTCACTATTCTTGTCTTTCCGAGATTGACACCAAGAA<br>TTCCAGGACCAGCTTTACC     |
| 39724600 F 0-44:G>A-44:G>A | TGCAGAAAGTTTGTCTCAGCTATAGATGTGCAGACATGGATAGGGAGAT<br>CCCTGCTTAC              |
| 39729038 F 0-47:G>A-47:G>A | TGCAGTTGGCATTGGCGCTTCGGCTTTCCTCAGAGGCCACTTGTGCTGAT<br>GATCCTAATTTCTTACAGA    |
| 39724288 F 0-51:C>T-51:C>T | TGCAGTTCTCAGATTAGCAGTCAGTGGTGTCTCCAGTATAGTTGAATGGAG<br>TCGGAGGTCTGTCTGGAAA   |
| 46766917 F 0-12:G>T-12:G>T | TGCAGAAATGCAGATCTAGTAGACATTAC                                                |
| 39714962 F 0-33:G>A-33:G>A | TGCAGATGATAATGCTTCTACCTTCTAAGGAGTCAGCAGCATCTTTGT<br>CAAATAAATGCCAGTAAA       |
| 39729265 F 0-62:A>G-62:A>G | TGCAGGGATTATCTACTGAGTGTACGAGGATTGGGTTTGAAAAGTGTGG<br>AGTGTGTTTCGTCTATTACAG   |
| 39717233 F 0-53:G>T-53:G>T | TGCAGGCTTTGATGTTCGAGCAGATTTTAGATCCTGCAAAGCAGAGTTTT<br>CTTGCATTGCCCGTCTTTG    |
| 39717382 F 0-12:C>T-12:C>T | TGCAGGGTCATACAAATACATTGCCCTTCTCTCTTGAATGGGTTGGCT<br>ACAAGCGGCATCCTATAGT      |
| 39717611 F 0-35:T>A-35:T>A | TGCAGGTTTCAGGGTTTCAGAGGCTGGGCTTTCAGCTATAGCACACTCTGCA<br>AATAAAGAAGCTAGTTGATC |
| 39728325 F 0-33:T>C-33:T>C | TGCAGGATTGTGTACACATATTCTTGAAGGTCATAGTGACGCTATATCTT<br>CGGTCTGTATTGTGAATCC    |
| 39724337 F 0-60:A>G-60:A>G | TGCAGTTGCTCAAGCCGCCCTTGCTTACCAGCTCTACCAGAAGAAGTTCT<br>CAGGCCCAAGATGGGAGGC    |
| 39719565 F 0-22:G>A-22:G>A | TGCAGAGAAGAATAGCTTGTGGAGTTTCAGTCAAATTAGCCATCTTAC                             |
| 39728866 F 0-52:T>C-52:T>C | TGCAGCCACGAATGCAATTGAATAAGTCCAAGATTCAGATAAAACAGGC<br>CGATATTGATAATAATCATT    |
| 39717192 F 0-49:G>A-49:G>A | TGCAGGCTCGGTCACAGCGGTTGGGCGGAGTATTGGCGGTGGAACCCGG<br>GCTGGAACCTGGGCGCGGTTG   |
| 46756484 F 0-14:G>A-14:G>A | TGCAGGCTGCATCAGCCTATGTACTTTAGTGGAAAAATTATGGAGAAGA<br>CTTCTGTTCCAATTAGGAAA    |
| 39713586 F 0-23:A>T-23:A>T | TGCAGAAATAGAGGGTCAATCTGATTGTGATGATTCGTCTCCTATTGTCA<br>TAGTGAATGAGAATGATCT    |
| 39717983 F 0-9:G>T-9:G>T   | TGCAGTATTGGTGTAAGAAACAAGCTGTGTTGAAGTATCTGTAGTTCAAC<br>CGTGGGGCTTGTGGCATAT    |
| 39721982 F 0-64:A>G-64:A>G | TGCAGATATTCCGAACCTTAGGCACACCAAATGAAACGATTTGGCCTGG<br>ATTTTCCAAGCTTCCAGGAG    |
| 39717669 F 0-40:C>T-40:C>T | TGCAGGTTTCAGCCTCTTCAGAGATGTCAGTTTCCATAGGCACTATATAT<br>AATGAAAATTCTGCAATCC    |
| 39718618 F 0-30:A>T-30:A>T | TGCAGTTCACCTCAAGTGTCTAGTTTTTCAAGGGCAAAAATTTCTCTCTC<br>CGCAGCTCTTGGTTGCTTC    |
| 39716675 F 0-43:C>T-43:C>T | TGCAGCTTTGGAGGAGGAACTTGAATTGCAACGTAGGGAAATGCAGAGA<br>ATTATTTCAAGATAACCCGAT   |
| 39721433 F 0-24:T>G-24:T>G | TGCAGAAGTGCCTTGTCTGCATCTCCTTCGACATTATCCACCTTCTCACC<br>GCTAACTTTCTTCTGATA     |
| 39725415 F 0-30:T>C-30:T>C | TGCAGTTTGTGTTGAGATCAATGAATCAGCTTCAACAGAGTTTTTCTTTTT<br>CTTTAC                |
| 39723364 F 0-22:G>T-22:G>T | TGCAGGCGAATCTAGCGGCGGCGGAGTGGCGGTGGCGAGCGGCTGGGT<br>TGAAGAGGACGTGCATCGGA     |

|                            |                                                                            |
|----------------------------|----------------------------------------------------------------------------|
| 39719829 F 0-26:T>C-26:T>C | TGCAGATTTTTATTTTGTTCGTTTTGGCAGAACAAGATCCGAATCTGTTAC                        |
| 39722740 F 0-62:G>T-62:G>T | TGCAGCCTGCTCATAGAAGCAGTCTACTTTTAGTGGCACAGAAATTGTCC<br>TCAAATGCTTTTCGAGGCAA |
| 39727018 F 0-20:G>A-20:G>A | TGCAGATAACCAAACCTGGCTGTCATTGCTACTAAATTTAC                                  |
| 39715728 F 0-14:A>T-14:A>T | TGCAGCATGACAAAACAAAACCTGATCATAACCAACAAAACCAACCAA<br>AACTGAACTGACTGAAATGGC  |
| 39723133 F 0-48:C>T-48:C>T | TGCAGGAACAAGGTGCAATCTCAAATTGACTGTTATACAGGATAGGTTT<br>TAGATAGAGTCGTTATTAGA  |
| 39716811 F 0-7:G>A-7:G>A   | TGCAGGAGTCGAATTGGAAGGTACAACCTTACTCCCAGATGAAAAGGTGT<br>GACATAGTTCAAAATATAGA |
| 39718809 F 0-57:C>T-57:C>T | TGCAGTTGTCAGCATATGAATAGTGGACCTGACGACTTAGCCCTCTCTGT<br>TTCATGCCAAATCTTGTCT  |
| 39719804 F 0-9:A>G-9:A>G   | TGCAGATTGACAATGAATATACAGAGTTAC                                             |
| 39722026 F 0-56:T>A-56:T>A | TGCAGATCGCCGTTTTTTGATCCTTCCGTGCTTGTGTAAGATATTGAAG<br>TTTTCTTTGATTCTCAAAA   |
| 39727751 F 0-15:C>T-15:C>T | TGCAGGTATTATCCTCCATCTCTTTTGCTTTATGTTTGTTCATTATCA<br>GTTTTATATGTTGAAAG      |
| 39716810 F 0-12:G>C-12:G>C | TGCAGGAATCCTGCCTTGGTCCAACGTATCCAAACAAATGTTTATATAAA<br>ATATTGATTTTATATAAAA  |
| 39721075 F 0-16:A>C-16:A>C | TGCAGTAAATAGTATAATTGTGAAATGCTACACTAGGACTACTACGCTA<br>CATTATTCTGAGCATAGACC  |
| 39715162 F 0-50:G>A-50:G>A | TGCAGATTTACTGCGAACTCTGAGTTGTAAGTACCACTTATGTTTCTGAT<br>GTTGATGTCACTCAGCTC   |
| 39716624 F 0-6:T>G-6:T>G   | TGCAGCTTGGTACAAGTGTAGTCCCTCTTTGTAATGACTCTGTATGTGA<br>TATATGTGCTAATTGGATG   |
| 39726288 F 0-39:T>A-39:T>A | TGCAGCTGATCCCAAGTTACTTGTATCTAAAATCGTATCGCAACACAG<br>TTCCTGTGCCAAGGCATTG    |
| 39717680 F 0-37:T>A-37:T>A | TGCAGTTTTGTGGTTTTGATCTTCTACGATGTGAGGGTTCGCTCATATGTT<br>TGTGATGTAAACGGATGGA |
| 39717706 F 0-28:T>C-28:T>C | TGCAGTAAAAGATGATGAAGCATGACAATATTTGGGGAGCCTAAGCCTT<br>TTGAGCAAAAATACATGCTTT |
| 39714750 F 0-65:T>A-65:T>A | TGCAGATAATCAAGATAATATTTCAAAAAACAGCTAATTCCTAGTACA<br>ACAGCAACACCACTAATAAAA  |
| 39715606 F 0-51:C>A-51:C>A | TGCAGCAGGGCTTGAAGGCCTTCTAAAGAAGGTTGAGGAGATAATGAAA<br>GTCACACCCAATAGCTATTT  |
| 39727786 F 0-57:A>G-57:A>G | TGCAGTAACTTCTTCTCGTCAAAGTGCTGATGTGCGAACAGTCATCTCCA<br>ATTTGAAATCTGTTTTGAA  |
| 39714047 F 0-50:A>C-50:A>C | TGCAGAATGTAATATGGAAGTAAGGCTTTTTTTCACTTTTTCATAGTTGTA<br>ACTTTTGAAGTTTTACGCA |
| 39728023 F 0-38:A>T-38:A>T | TGCAGCCTACAGAAAAACATTCATAAGACAACCTGAATAAGGAACAATAG<br>ATTAC                |
| 39724254 F 0-56:A>T-56:A>T | TGCAGTTCATTGTCAGCTTGAAGAAACCTCCAGTGTTTTGTATCATCACG<br>GAGTACATGGCAGGGGGTT  |
| 39724576 F 0-18:G>A-18:G>A | TGCAGAAAAGAAATTATCGAACGAAGAATTAC                                           |
| 39714992 F 0-50:C>G-50:C>G | TGCAGATGCCATGTCAGAACCTCAGAAGATAAGTTCATAAATTTTCCACCC<br>CATAAAAAGATGGGAAAAA |
| 39720154 F 0-16:C>A-16:C>A | TGCAGCTCAGAAGCAACTATGGACGCTTAC                                             |
| 39713345 F 0-46:T>C-46:T>C | TGCAGCTTAGTTGGGAAAAAGAAAAACCTGAAGATCTCAATGATTGTGG<br>TATCTTATCTAGAGTCTGAA  |
| 39715317 F 0-15:A>G-15:A>G | TGCAGCAACTTCTCAGTGATGTTATTATGTCTGTTTCATCCTCAATGGCT<br>CGGCGGGAGCGAAGTTCT   |
| 39728224 F 0-12:C>T-12:C>T | TGCAGATGGGACCCGAGCGCTATTCTCGACTATACAGAACTTTGGCC<br>ATGAAAGTCCCATCGTTACA    |

|                            |                                                                         |
|----------------------------|-------------------------------------------------------------------------|
| 39715277 F 0-64:C>T-64:C>T | TGCAGCAACAAAAGATACTTGCATGGCAGCTTGCACGCCCTCAGGGACGTCCGAAGAATGCGTTCGATT   |
| 39720795 F 0-21:G>T-21:G>T | TGCAGTTACAGCCTGTTCAGATGTCAAGACCATTATTAC                                 |
| 39717055 F 0-6:C>T-6:C>T   | TGCAGGCAATCTTGCATCTGACCTTCCACTCTATATGGTACCATTTACAACCAGAGATCTTTTATTCA    |
| 39719336 F 0-8:T>C-8:T>C   | TGCAGAAATTACATATAGACTACTAAATGAACAAATTTAC                                |
| 39720625 F 0-22:T>C-22:T>C | TGCAGTATGCAAATGACAATGCTTTGCTTCTTGCCAAGGTATTTCAACCATTAC                  |
| 39728091 F 0-29:C>G-29:C>G | TGCAGTATTCAAGTTCTTATAAACGGTAGCTAACAAAAGAATTAC                           |
| 39716242 F 0-25:C>A-25:C>A | TGCAGCTAAGTTTCTTTTATCCTATCAAATAAAATACTAGAATAACATTATGAAAATTTGTATTATATA   |
| 39724383 F 0-18:A>G-18:A>G | TGCAGTTGTTGCGTAGACATCGTCGAGTAAATGTGAACCAGGGTTCCCTAGGTCATGAAGAGGTATTGA   |
| 39729494 F 0-48:T>C-48:T>C | TGCAGAGACATTACCCAAACATTTGGAAAATCAGAACACAATCTTCTCTGGAAGCAAGGATTTTACAGA   |
| 39721142 F 0-58:G>T-58:G>T | TGCAGAAAAGTTTTCATGCTACTATTCATTTTCTGACGCAATCCTGCAACCCTACTAGGAAATAAAATT   |
| 39714993 F 0-16:C>T-16:C>T | TGCAGATGCCTTATGCCGAAGCCTACGAATTGGTCCAATGGAACCAGTTGCCTCATCTAAAGGATAGTT   |
| 39715691 F 0-15:G>A-15:G>A | TGCAGCATCAGACAGGTAAGGAAGGTTGGATAGATCTAATTCTTGCAGTTCTATTTTAGATAAGCCATC   |
| 39718379 F 0-30:G>A-30:G>A | TGCAGTGGAAGAAGAGTAAGAGAAGGAAGGCTCCTCGTCTAAAGAGTATGCAATACATTATTCAGTTA    |
| 39718155 F 0-23:C>T-23:C>T | TGCAGTCTATCCTCATTCTTCATCTTTGTTGGACGCAGTGCATTTACTTTTGCCTTCATGCTTTAGAGT   |
| 39720504 F 0-30:A>G-30:A>G | TGCAGGTGAAATTGTAATGTAATCTTATCAACATTATTGTCTCCTTTTCATTAC                  |
| 39716447 F 0-54:C>T-54:C>T | TGCAGCTGCTGGGGCTTGTACAGTCGTATTGACGCAGGTGTAATAACTAACAACACTTTTACTTATA     |
| 39724202 F 0-32:C>T-32:C>T | TGCAGTTACGGAAAACTGAACGTGGTGAGATCGCTGCTAAATCTAGCA AATGAGGTCTAATGTGCAAG   |
| 39713706 F 0-43:A>G-43:A>G | TGCAGAACCATTTCGTGGCTTCTTGCAGGATATGATATCAGAAAAGGAGTCAACTAACTGTCCAGCCA    |
| 46775562 F 0-6:T>C-6:T>C   | TGCAGATTTCCCACTCTGCAACCATACAGAAACGTTTTTAC                               |
| 39718990 F 0-52:T>C-52:T>C | TGCAGTTTTTTTATTTCGAAGCATTGTGAATAATTTTATTAGAGGTTGCTATGTTTCGTCCTTGATCGATG |
| 39720481 F 0-11:T>C-11:T>C | TGCAGGTATCCTATCCGCCAATTTGTTTCACTTTTCTTCAGGAACCTTTT TAC                  |
| 39717543 F 0-27:C>T-27:C>T | TGCAGGTGCGTCCCATCTAAGAAATGTCTTTTACAGGATGGGACTAACTGACAAGGATATTGTGGCATT   |
| 39715661 F 0-12:C>G-12:C>G | TGCAGCATACTTCTGTTTACCATAAGTAATGCCAGAAAGTGTGAAGGTGATCAGGTTGCTCCGGACA     |
| 39720067 F 0-51:T>C-51:T>C | TGCAGCCTCAACTGCTGTTTATGTGTACTTGTACTCAGTATACTACTACTATGTTAC               |
| 39713732 F 0-34:T>G-34:T>G | TGCAGAACTCTCTTGGCCTCGTTCATGCGGCCTTTGCTGACAAGCCAACGAGGAGATTCAGGGAGAAAC   |
| 39717164 F 0-55:G>T-55:G>T | TGCAGGCGCTCTGAAGAAATTCGGTGCAGATGTTGAGTGTGCAGATAGCGGGAAAGCTGCCCTGAAGTT   |
| 39727220 F 0-8:C>T-8:C>T   | TGCAGTCACTTCCCTAAGAGAAGAAGTAAAAAACACATTAC                               |
| 39727694 F 0-66:T>A-66:T>A | TGCAGGATATCAACTTGATATCGTCATTCTAATTCATAAATTCATAAGATAATTATAATCTTCTCTCA    |
| 39715589 F 0-6:A>G-6:A>G   | TGCAGCAGCTTGTGCTGGCAGATATGGGATTCAGGCTTGGCAGGCATTC AAGGCAAGGCCACCAACGGC  |

|                            |                                                                         |
|----------------------------|-------------------------------------------------------------------------|
| 39723577 F 0-36:A>G-36:A>G | TGCAGGTATTCTACTATCTTAGTGAGCTTACCTTCAATTTATAAGATCAACATTTCACTACTTGTGGC    |
| 46753686 F 0-11:C>T-11:C>T | TGCAGAAAGTACGATTGGCTTCTGCTGCATACCTGCAACTCCCATGACTGCTGAAGAGTGCAGGTTTCT   |
| 39726462 F 0-65:T>C-65:T>C | TGCAGGGATGTATTCTGCATTACCTTATGCCCTTGCTCAGGTATGTTGATGGCTTACAAATTCATTTAC   |
| 39715734 F 0-38:T>C-38:T>C | TGCAGCATGCCATAATAACTCAAAGACACATGCCTGAATCCC GCGAGATCGAACCGTTGACTCCACTTC  |
| 39720775 F 0-27:A>C-27:A>C | TGCAGTGTCCATATCTGTAACACCGTCAACCGCCTTAC                                  |
| 39714507 F 0-25:A>G-25:A>G | TGCAGAGCCAGCGTTTGAGGTGTGGAAATTTGCTTATTTTTACACATTTTGTTTCATTCATGTGTTTTAG  |
| 39717609 F 0-17:C>T-17:C>T | TGCAGGTTTCAGGAAAACTCTGCCTAGCTGCTTCTGCCGCAGAACATGAAGATCTCCTCCAGGACAATA   |
| 39717902 F 0-47:T>A-47:T>A | TGCAGTAGCTCTTCAAATATTGTTTTCAAGTCCAGGAAGTGGTATAATTTCACTGTCACCTTAGGTCCG   |
| 39715726 F 0-6:A>G-6:A>G   | TGCAGCATGAAATGACTTAGACACCACATATAGAATCGTCCTTGGCAAA AATCAGTTCACCAGACTATT  |
| 39728073 F 0-23:A>T-23:A>T | TGCAGGTCGCTTACAACTTGACAACCTGACATACATCAAAAATAATTAC                       |
| 39716650 F 0-30:T>C-30:T>C | TGCAGCTTTCAATACAGGCTTGGGGCAGGTTTGAGAAGAAAATCTGTGTTATCATCGTCTTTACTTCT    |
| 39715468 F 0-58:C>A-58:C>A | TGCAGCACTTCTAAGGTCGCTTTTCTCGCTTTTCTTGTCTTCTTCACCTTCCGCCACAAAGACTCCC     |
| 39714025 F 0-39:G>C-39:G>C | TGCAGAATCTTCTTCAGTTGCCGGAAGCAATCGTATACCGAGGCCCATCTTCCGAGAAACATTTTCTTC   |
| 39716663 F 0-14:C>T-14:C>T | TGCAGCTTTCTCATCTGCCTTCTGCTGCTGTGACCTATCTCCAGTTGATGAGCAGCGGAAATCTGTAG    |
| 39715094 F 0-20:C>T-20:C>T | TGCAGATTCAATCTTCATGTGAGAAGAGAAAATTGAACAAATAATGAATCATTATAACCAAATCCAAAA   |
| 39728718 F 0-50:T>C-50:T>C | TGCAGATATATAGTTCCATTGGCATGAGTAAAGATTCATTCTTAGTGTCA TACAAATATCATGGTTACA  |
| 39718961 F 0-55:T>C-55:T>C | TGCAGTTTTCTTTTTCTATGACCTTTCTCCTATCAAGGTTGGTTTTTCTTACATGTTCAATATGTGATG   |
| 39719781 F 0-32:A>G-32:A>G | TGCAGATGTTCTAAATGAGAAGAATCGAAGAAAAATTGCGGGATGGGCCATCTTGTTAC             |
| 39727143 F 0-9:A>C-9:A>C   | TGCAGGAGAAGTCCAGTCTTTAGTTGAAATTTTCAGGTAGAAGAAAATTATGTTTAC               |
| 39713332 F 0-46:T>G-46:T>G | TGCAGCCTCGTTCAATCCCTTTGAACAATGGGAATACGGAGGCTTCTGGTGCGGCAGTAAAGCCAAAGA   |
| 39713906 F 0-51:G>A-51:G>A | TGCAGAAGGTCTAGAGGAAGCGTTTTTCATGTGCCTAAGCTTTCTCGTTTACAGCATCATATCTGCATGGG |
| 39723609 F 0-60:T>C-60:T>C | TGCAGGTCTTCTGTTTCCCTTACCACTTCCGTCCTTTCGGATTTCACTTTCCTTGATATTAGGCAATT    |
| 39722397 F 0-66:C>T-66:C>T | TGCAGCAGAATTAGCAGAAGAGGAAAACCGAGCTAGAGAATTGGAAGA GAAGAATTTGATTATCGACCG  |
| 39723260 F 0-67:T>G-67:T>G | TGCAGGATGCTCAGAAAGAATCTGAGCTTACTTCTGAAGCAACCGAGAGGGAACCTGAGTTAGAAGCTC   |
| 46767178 F 0-14:G>A-14:G>A | TGCAGCTTTCTTTTCGTGTTTGTCTTTAGGGGCTCTTAC                                 |
| 39717106 F 0-63:T>G-63:T>G | TGCAGGCATTTTCTATAGCACTGCTTGCCAAGGAGGTGGACAGGAGACTACTGCGTGAGCCTCTTTTGA   |
| 39713998 F 0-35:C>A-35:C>A | TGCAGAATCATCAGGCTGATCTAGCTCAGATTTAGCAACACCCATGCTTA TAATTTGAGATTCTCCTAT  |
| 39722780 F 0-9:C>T-9:C>T   | TGCAGCGATCTTCTGATTCTAGCTCTTCAATCTCAAACAGAAATTTAGATTTTCAACACCCAGGTTTC    |
| 39713863 F 0-54:G>T-54:G>T | TGCAGAAGGAACTGAAATCGTCAAACCATCGAGTTAGAGTTGCACAAGTATGGGAACGGAAACGGGAA    |



|                            |                                                                         |
|----------------------------|-------------------------------------------------------------------------|
| 39716961 F 0-7:T>A-7:T>A   | TGCAGGATAGGCAGAGCCAACGTAACCTGGCTGGAGGCATGCCATAGTTTCTATTGGCCATACCCTGGCC  |
| 39715158 F 0-45:A>T-45:A>T | TGCAGATTGTTGGAAGTGTGTTGAAGGAACAATTCTTAGTGTGACAAAAGTTACTGGGGTGGCGATG     |
| 39715381 F 0-51:T>C-51:T>C | TGCAGCAATGCTCTCACCAGGGAAAGATGGAAAACCTGTAGAGATTTCAGGTCCCATTGACAGCAACTA   |
| 39715818 F 0-66:G>A-66:G>A | TGCAGCCAACCAACCATCGACCAGCTCAGCAAACCTGTGAATCAGTCACTGTAAAGAACTGGGCCGCGTG  |
| 39716696 F 0-68:A>C-68:A>C | TGCAGCTTTTTATGGCCTCTCTTCTTCTTTCATGTGCCCCACATTCCCTAAAATGACTTTGAGAGAA     |
| 39715455 F 0-63:A>T-63:A>T | TGCAGCACTAAAGAACCAGCTTGAACCTCTGTGAGTACTCAAACCTCTATTGTTTTACAGCAAATTGAG   |
| 39716417 F 0-57:G>A-57:G>A | TGCAGCTGCAAGTGTGAGAGACAGGGGAAAGTGAGGGAATATTATGAGAAAATTGGGGAGATGGGTGGT   |
| 39719562 F 0-17:C>A-17:C>A | TGCAGAGAAATTCGCGGCGCTTTAC                                               |
| 39725062 F 0-17:T>C-17:T>C | TGCAGGAAGGAAAAGAGTGAAGAAGATTTGTTAC                                      |
| 39728582 F 0-9:T>C-9:T>C   | TGCAGCTGCTCTTGCTTCTGCTTCATTGGTCTTCAGAAGATCTGATCCCACCTACTCCAAACTCTTACA   |
| 39715495 F 0-39:T>C-39:T>C | TGCAGCAGACAATGGAAGTATGGTTTCCTGTGAAGCAACTTCATTTTGAAATAAAGATATATATACACA   |
| 39720092 F 0-9:A>C-9:A>C   | TGCAGCGAAAGGGAGAAATGTGTTCGGTGTTCGGTGCAGTGTTTAC                          |
| 39725312 F 0-43:C>T-43:C>T | TGCAGTGCAACTGATTCATTTCTGAAACCCAGACTGATCTTCGGGAGCATTAC                   |
| 39715201 F 0-63:C>T-63:C>T | TGCAGATTTTCAAAGACTTCAAGAATTCAAAGTTGGTGATTGGATCCGTGTGCGTAATACTGTCCCCAC   |
| 39724727 F 0-25:C>G-25:C>G | TGCAGAGACATCACAACCAATTGAACATCAGGAACTATGAGAAAAGCATTAC                    |
| 39723569 F 0-17:A>C-17:A>C | TGCAGGTATAAGAATATAATGGCAAGCAAGACTACAATTTGTTGATTTTATTCTATATGCATTGCAATC   |
| 39715384 F 0-10:G>C-10:G>C | TGCAGCAATGGATACTTCAGCAACTGTAATTGGATGGGCAATGGCAGAGCTTATTAGGCATCCACATGT   |
| 39717057 F 0-40:G>A-40:G>A | TGCAGGCACAACCTGGAGAAGATATTGTCTGCCAATGGACTGTCTGAAAA TGTGTTTGAAATTGCATCAA |
| 39716622 F 0-6:T>C-6:T>C   | TGCAGCTTGCCAAAATAGCCGATCAAGCCGTAGATTTTCGCTCTAAGCAAGTCTCTCCTAGAGTACCTGC  |
| 39715759 F 0-43:G>T-43:G>T | TGCAGCATTCAAAGGGGGAGCTGGTTCAAGGGATATTTATGAGGTTGTGAGAGAAATTGATGTTCTGTT   |
| 39714309 F 0-11:T>A-11:T>A | TGCAGACTTCGTTCCCTGATCAAACTACCCTTTAGATACGGTAGTCCGTAGGGGAATTGTTTCATACT    |
| 39716856 F 0-38:C>A-38:C>A | TGCAGGACGGCTAGAAAAATAGCTGGAATCTTTTTTTTTCTAGACACTTTACTGTTAGAGAACTGGATGA  |
| 39722991 F 0-58:T>C-58:T>C | TGCAGCTGTCTCAATTAGGCGAACCATCTCATTGTGTGATGACACGCAATTCATCCATGTGTTGTGTCTT  |
| 39717675 F 0-13:G>A-13:G>A | TGCAGGTTTGCAGGGGGACTGCTGTAATGCTTGTGTCTCCAGTTGATGGTACAGACGAGATTGCTAACC   |
| 39716203 F 0-8:C>T-8:C>T   | TGCAGCGTCAACCCACGGGAACCCACGCGTTTGACACCATAGCTACCGGAGCTTTCAGGGCGGGTTTA    |
| 39720315 F 0-18:G>A-18:G>A | TGCAGGAGAAGATGAAAAGAGGTCAACTATGGTTAC                                    |
| 39725165 F 0-36:T>C-36:T>C | TGCAGGTAGTTGTGGATATGATATGAAAAAGGTATATAAAATTCCAGTTTAC                    |
| 39716538 F 0-58:C>A-58:C>A | TGCAGCTTATGAACGCCGCCGCTCCCCGATATTCTGAACGCCACCGCC TGCTTCCCAGCGCCCCCG     |
| 39719937 F 0-14:C>G-14:C>G | TGCAGCAGAGTGAACAAAGCGATTAC                                              |

|                            |                                                                        |
|----------------------------|------------------------------------------------------------------------|
| 39721082 F 0-25:G>A-25:G>A | TGCAGTGGTGGCGGCTGCGGCGGTGGTGACGTGGATCACGATGGTGGTTCTGCTGGCGTTTCATTGGGAG |
| 39713743 F 0-59:G>A-59:G>A | TGCAGAACTTTACCACCATGAACGCACTAGTCGAATCGAGTCCCGATGTCGGCTCGTCGAGGAATAGG   |
| 39720095 F 0-11:G>A-11:G>A | TGCAGCGACCCGGGCAGCTAAAGAGGAAGAAGAGTCAAGACCTGATGTTTAC                   |
| 39724648 F 0-25:C>A-25:C>A | TGCAGAAGGAAGCTCTCACAGATGACATTCTGACCTTTCTTCCTTAC                        |
| 39725329 F 0-14:C>G-14:C>G | TGCAGTGGAAAGATCAGCTAAGTTTTAC                                           |
| 39725776 F 0-60:T>A-60:T>A | TGCAGAGGATTACCCAATACTTCTCGGTAGTTTGTAACAGCTTATGGTTTTCCTCCCTCATTATCTT    |
| 46765286 F 0-7:A>G-7:A>G   | TGCAGTTACACTAAAAATCATCGTACGGGTGCTAAGAATCGGCTTCTTATCTACTTATCTCACTTTG    |
| 39727414 F 0-54:C>T-54:C>T | TGCAGACTGAAACTATTATCCAATTGCTGATGAGCTCAGGTGGGAAAATTTCTACGGAATTGGATCCAT  |
| 39720227 F 0-35:T>A-35:T>A | TGCAGCTTCTCCTGGAGCTCTTGGTCAAACCATTCTGTATATATTTATCCTCCTATTTAC           |
| 39727045 F 0-24:C>G-24:C>G | TGCAGATTCTGCACTGATCGGAACTTCTGCCACGTTACCGTTTAC                          |
| 46765363 F 0-27:G>A-27:G>A | TGCAGTTCGGTTCATATGATTTTATATGCATTATGTTGTTTCTTGTCCAAAAGTTCTAATGTCACTTTG  |
| 39722688 F 0-50:G>C-50:G>C | TGCAGCCGCGGCGGCTGGTGGTAGTCTTGTGCGACATAGAATTAGAA TGAGTCTTTGAGTTGCAGAA   |
| 39713259 F 0-45:C>T-45:C>T | TGCAGAAGATCACATTCAAGGAGACCCAATGGACGAGTGTCACTCCGATCCACAGATCTCAGAGACAAA  |
| 39723457 F 0-51:T>C-51:T>C | TGCAGGGAGTGCTTGTTCAGTAAAAACCCAGTCCTTATATAGAACAGCTGATATCTCCATGGCATATTT  |
| 39713827 F 0-41:G>A-41:G>A | TGCAGAAGCAATTGCTGGGTTACTATCTTCTGCAAGTCTCTGCAAAACCAACAAACAAGCATCAGAGAC  |
| 39713456 F 0-12:A>T-12:A>T | TGCAGAAAATATAGCAGTGGAGGCATTAGCTGCATTTCAAAGTGCCTTGA AACACCACATGCCTTGCAC |
| 39728010 F 0-21:G>A-21:G>A | TGCAGCAGATGAAACCCAGAAGTAGACTATACAATTGAGGCAGAAAAA TTAGATATTTAC          |
| 39729454 F 0-42:A>T-42:A>T | TGCAGAATTAGGTACTGTCTTACAACCTCCATAGATATGCTGACCACTGT TATGTTTATCATTAC     |
| 39727973 F 0-43:A>G-43:A>G | TGCAGAAATTGTGACCTGAACTTGCTGTGCTGTATGCTTTTGAAACCCAA AAATTAC             |
| 39716773 F 0-33:T>C-33:T>C | TGCAGGAAGAACTGATACTTGGAGACATCTTTATGCAGGATTCACGGTCTGGCTTTCTCAAACCTGAGGC |
| 39717283 F 0-50:T>C-50:T>C | TGCAGGGATCTCATTGTCTCTGCCACACCTCTTCCATTGACTTCATTTTT AGTTCATACTCTGACCAA  |
| 46763530 F 0-24:G>A-24:G>A | TGCAGCAGCGGCAAAGCAAGCGAAGAATTCCAAAAAAGAACTCCAAC ATTGTCGGCTACTAATCAGCG  |
| 39717036 F 0-58:C>A-58:C>A | TGCAGGCAAAAAATCTAACCTTCTGGGCTTCGAACTTCCCAAAGCAAG GAGAACAACCTATATTTTTA  |
| 39724979 F 0-11:C>T-11:C>T | TGCAGCCTCATCTCTCCATTCCAATTGCTTAC                                       |
| 39725864 F 0-38:G>T-38:G>T | TGCAGATCTGATGCTTGGACTGCAAGTTCAATTCCACAGAGAAAAAAGC CAAGCCATTCAGAACATCAA |
| 39723737 F 0-62:A>C-62:A>C | TGCAGTAAATATTGTACATTGCTCTTGAAATCCACATCTGAGGTTGATCC AGGATTGGTAAGAATGAAC |
| 39719448 F 0-33:C>T-33:C>T | TGCAGAATATCGCCCGAGTCGATTGCTGATTACCTCTGTACTTAC                          |
| 39717201 F 0-62:C>T-62:C>T | TGCAGGCTGCGCCATAGAGGTCCTGACTGGAGTGGTTTGCATTGTTTTGA AACTGTTATCTCGCTCAC  |
| 46753523 F 0-41:C>A-41:C>A | TGCAGAGGCTGTTTGGCGGCCGAGAAAGTGAGGGAATCCGGCGGAAAA TTCAGGCTGAGGCTGAGCTGG |

|                            |                                                                         |
|----------------------------|-------------------------------------------------------------------------|
| 39728250 F 0-35:A>G-35:A>G | TGCAGCAGGGGAATGTGCGTGGCGTGTCCGAGCCCAAAGGGGCTTCTGGGGTGGAGCGAGAGCTGTGCG   |
| 39717248 F 0-27:A>G-27:A>G | TGCAGGGAACTCAAATTAGTGACTTCAATATCAGCAACCAGAAAACAAAGAATATAGGATACATCAA     |
| 39716969 F 0-16:G>C-16:G>C | TGCAGGATCAGAGTACGATAACGATGCTGACTTATCATCTTCGAATATGATTAGTTTCGAATTATCCA    |
| 39723159 F 0-57:T>C-57:T>C | TGCAGGAATGCGTAAACACTGTGCTACATGCCAAGCATTCAATTTGGAAAAGAGCATGTTTCCCCGAAAC  |
| 39716109 F 0-17:T>C-17:T>C | TGCAGCGACCGGTACTGTATTTTGTGGCCGTTTATAATCAGACGGACCGTGTGAAGGCCATGGTGGCG    |
| 39724435 F 0-43:C>G-43:C>G | TGCAGTTTGAATGTGATTGAAGTTTCCTTTTGATGGATTGACGTTGAAACCCTAAAACGGGTTTCGAA    |
| 39715898 F 0-60:T>A-60:T>A | TGCAGCCATGGAAAAAATTTCTGGTTGGAGGAAAGATGAAGTTATAGGAAAAATGCTAGCTGGGGAGAT   |
| 39721937 F 0-55:C>G-55:C>G | TGCAGATAACCCAAAAGTCATTCAATAAATCTTAGTAAAAAATTCTCCCCTATTCGATTCAATGACTT    |
| 39714971 F 0-46:G>T-46:G>T | TGCAGATGATCTTCTTGCATCTGTTCTAAAGGTTTGATTCATTCATGCATTATGTTTCTTTTCTGCAC    |
| 39722261 F 0-65:G>A-65:G>A | TGCAGCAACAACAATTTTGGCTGCTGTTTCTGCTGTTTATGTTAGCAAAGGGCGCTGAGGCTGAGGCTG   |
| 46757706 F 0-43:C>G-43:C>G | TGCAGTTTATTCTCATTTCTGTGATTGTTGATCGAGCCGATTCCAAGGGCGTCCCAATTCGACGATTC    |
| 39722655 F 0-18:T>G-18:T>G | TGCAGCCCCGAATCACTCATATCTTTGGAGAGACCATCAATATTTCAATCC AAGTTATTATAGGCTTACA |
| 39725234 F 0-17:A>T-17:A>T | TGCAGTACATAATTACAATTACACGGTTAC                                          |
| 46754334 F 0-35:A>G-35:A>G | TGCAGAGAGGTACTCTGTTTACAACCAACCAGATAATAATGTAAAAGCTAGTAGTTCTAAATCAAAG     |
| 39724797 F 0-32:G>C-32:G>C | TGCAGATATCAACAACATCATAAGAGGTACACGATAGGAAGCACTCTAA AAATTTAC              |
| 46757530 F 0-36:C>T-36:C>T | TGCAGTTCCAAACAAAGAATCCATCTATGAAGTGAACGGCAGTCCAATTACAAAGCACAAAGGGATCTTT  |
| 39720505 F 0-11:A>C-11:A>C | TGCAGGTGAAGAACAGATTGCGGCATTAC                                           |
| 39725369 F 0-11:G>A-11:G>A | TGCAGTTCCCCGAGTTGGATGTTAC                                               |
| 46764972 F 0-51:C>T-51:C>T | TGCAGTCAAAGCTTAGACCACTTGATCCAGTGCGTGAGTAAGATGGTATGACTCGAAAGATATTGATGT   |
| 39713849 F 0-10:C>G-10:C>G | TGCAGAAGCTCCAATGACGTTTGGCTGAAAAGCATGGCTGGCAATACGAGGTTTCACTGAAATTTTGTTA  |
| 39716201 F 0-47:C>T-47:C>T | TGCAGCGTCCAACGTCTTCTCCTGTCACCACATTCTTCTTTTCTTACTCTAAGGTTCTACTCTACATT    |
| 39725292 F 0-12:C>T-12:C>T | TGCAGTCTTCAACCAACTTGCTTTGTGATGATTGTTAC                                  |
| 39715875 F 0-38:T>A-38:T>A | TGCAGCCAGGGACATACCTATAACCATGCTCATTACGGTTTGCAAAGAGAAGATGGTCTCTACGGATCCA  |
| 46761021 F 0-31:G>T-31:G>T | TGCAGTAATGAAAAGGTTATTTACTTTTTTTGTTTTTAC                                 |
| 46776428 F 0-52:C>A-52:C>A | TGCAGAAAGTTATAGTGAAAGTTGTACTTTTTCCATAAGACTTCACCTTCACCATAATATGCACAAGC    |
| 39723852 F 0-66:A>C-66:A>C | TGCAGTATATATATTTAGTTCGTGTTTCTTGCATTCCTTCTAGTATTTTACCTCCCGAGACTTTATACC   |
| 39724364 F 0-55:C>T-55:C>T | TGCAGTTGGTTGTGATTCTTGTGGGGTAATTCCTTATATTTCCATCATTCCTCCCGTACTGCTTTCGA    |
| 39725315 F 0-14:A>G-14:A>G | TGCAGTGCCGATGAAAGAGTCAATTAC                                             |
| 39726083 F 0-61:T>G-61:T>G | TGCAGCATCATCTTCTCCTTCTCCACCTCCATGTTTTGCAACCAGAACCTGTTGAAAACAATAAAAAGT   |

|                            |                                                                         |
|----------------------------|-------------------------------------------------------------------------|
| 39718246 F 0-18:A>T-18:A>T | TGCAGTGAACCTTATGGGTAGCCGAAAAGCCTTACTATAGTTATAACAAC AACGCCTGCGTCGGGGGCGA |
| 39717299 F 0-55:G>T-55:G>T | TGCAGGGCATCATATTGATGGCCGCTACAAACTGCCAGATATTCTTGAT CCAGCGTTGACAAGGCCCC   |
| 39720148 F 0-11:T>C-11:T>C | TGCAGCTCAAATCATAAATAATACCATAATTTGTTTTTTAC                               |
| 39718512 F 0-35:G>A-35:G>A | TGCAGTGTGAAGAGGATATGGTCGATGGCTTCCCGTACGAAGTACCTG AGGAATACAAAAACATGCC    |
| 39727917 F 0-55:C>T-55:C>T | TGCAGTTTGCCGTTGAGCATCGAGGGTCGTATAGTGATTTCGCTTGGATCT GCTGTCTGTCCCTTTTATT |
| 39721378 F 0-9:A>G-9:A>G   | TGCAGAAGCAGGCACAAATGACTGCGACTGTAATGAAAGATTCAAGCC GGCCATGTTCAAAGTTTCTT   |
| 46756353 F 0-36:C>G-36:C>G | TGCAGGCAACCAGAACATGTTTGCACATGACACTATCTCAGGGTAAGCC AGAGCCCATGATCCAGTATG  |
| 46763304 F 0-44:G>T-44:G>T | TGCAGATTGCTGAAGAACGATATTTGAGGTCATGTGGTGTCTCTGCTTTG ACCTCACAGCTACCTAAAT  |
| 39726053 F 0-17:C>T-17:C>T | TGCAGCAGCCGGGCATTCTCAATTGATCTTTCTCCACTAACTTTTGTTTTC CCAAATCTCCATGGTTCT  |
| 39718757 F 0-53:A>T-53:A>T | TGCAGTTGCGCTGCAATCAACAGAGATGGAAACCTTTCTTTGTCAGGCT GCAATGCATTAGGCCTTCC   |
| 39715414 F 0-27:G>A-27:G>A | TGCAGCACAAGTTGCCACAACCACAGCGAAGGTCAGGACAGAAATTGCA GCAACAGAAGCCATGAATTA  |
| 39724641 F 0-20:A>G-20:A>G | TGCAGAAGAGAAAACAAAATCAGATGTCGAAATTAC                                    |
| 46765261 F 0-68:G>T-68:G>T | TGCAGTGTGTGGCTTCTCACCCGAAACAAGGCTGCCATTTATGAAAGG TAAAATCTCGGTAAGTTTCG   |
| 39720768 F 0-14:T>G-14:T>G | TGCAGTGTAACCTGACGACTGAAATTAC                                            |
| 39725714 F 0-7:G>A-7:G>A   | TGCAGAGGCACACTTCTTGAAGTACTCCACAATGAGCCGCACAATAGAA GCAGCATGAGGTAACAATTG  |
| 46756865 F 0-37:T>C-37:T>C | TGCAGGTTGCCCTGCTTCTCCAGCCCTCTACAGCCAATTCCAAATGGTAT CATAGTACGGGTGATGTGC  |
| 39719495 F 0-55:A>G-55:A>G | TGCAGACAAGACCAATGAAGCTATGCAGTGTAGTTTTCTGAAATAGTA GGATACATTAC            |
| 39713726 F 0-47:G>A-47:G>A | TGCAGAACTACATTGAACACAGGTATGCATACCAGATATTATTGGTCGT AAATACATACACTCGGCAGA  |
| 39715444 F 0-45:T>C-45:T>C | TGCAGCACCCCTGTAATATTCTGAAATTCACAGGGAGGTAAAGCCTCAA GACATTGAAAACGGGCACTT  |
| 46776530 F 0-61:A>T-61:A>T | TGCAGAGAAAAGACTTTCAAGTTCTGACATGTCAATCTCTGGTGCCCTAC AACAAAAAAAATTACAGA   |
| 39726465 F 0-54:T>C-54:T>C | TGCAGGGATTTGAAACTACCGAGAATGTGTCTGTTTCATAGTCTTGGCTT GGATTGTTCCAAATGAATT  |
| 39725332 F 0-39:T>G-39:T>G | TGCAGTGGAGATGTATGTACAGCTAACTGTTTCATATTTTTCCCATTTTAG TTTATTAC            |
| 39725074 F 0-18:A>G-18:A>G | TGCAGGACTTCCCCTCCTAATGAAGTTTCTTCTTTAC                                   |
| 39726006 F 0-57:C>T-57:C>T | TGCAGCAATTTGCCAGATGGAGACGCCAATTGATTCTAAAACAGTCTGT GAAAATAACAACCATAAATC  |
| 46776531 F 0-62:T>A-62:T>A | TGCAGAGAAAAGACTTTCAAGTTCTGACATGTCAATCTCTGGTGCCCTAC AACAAAAAAAATTAC      |
| 39715488 F 0-25:G>T-25:G>T | TGCAGCAGAATACACATCTTTTCTGTGTTTGAATAATAATCCCCGATA GCCTTCCACTGCCCTACAA    |
| 39715947 F 0-30:C>T-30:C>T | TGCAGCCCGTTTCTCTCTGATGACAAATACTCGAGGCAGAGAGTTCTTC TCAAGAAGCGATTTGGCTT   |
| 39722231 F 0-66:A>G-66:A>G | TGCAGCAAAATACCAAGAACAAGAAGATAGTATTTCAACAATATTCCAT TGGCAACAATAAAAAAAGG   |
| 39717445 F 0-40:T>G-40:T>G | TGCAGGTACAGCCTATGTTTATCATGGTACAGTCGGTGGCTCTCGTTTAC TTCATCTGAGGTTATTTTT  |

|                            |                                                                         |
|----------------------------|-------------------------------------------------------------------------|
| 39727739 F 0-46:G>A-46:G>A | TGCAGGGTGAAGTTGAAATTGTCTGTCAGTGTGTTAGGCTTAGTTTGGGAGCTAAGGCTTGAGGAAATC   |
| 39723282 F 0-16:C>T-16:C>T | TGCAGGCAAATGGTTTCTGCTGTTTACGTTTCAATGGGTTCTACCAATTTGGGCATTGTCACCTCCTGT   |
| 39722323 F 0-7:A>G-7:A>G   | TGCAGCAATTGGAACATAGAGTTTTAGTCAAACCTTAGAGAATGAAGAAATTACTGAAATCTAATATGT   |
| 39722716 F 0-60:C>G-60:C>G | TGCAGCCTCAATGTACACTCTTCTAATCAACCAAATTGTGTTGTCAAGTTCAACTTCGGCCCCGATTT    |
| 39726146 F 0-47:C>T-47:C>T | TGCAGCCGATGATCGTTCAAGTGCAAACCAGACCGATAAAACCACCCCCGATGATTCCAATTCAGATGG   |
| 46765044 F 0-54:T>C-54:T>C | TGCAGTCGGGCCGGCACGTGCCACCACATTCTTCTGTTTGAAATTGTTGGTTTTTGGAAATTGGTTT     |
| 39724371 F 0-22:T>G-22:T>G | TGCAGTTGTATATACTTACTATTACTTTGTCATAGGTTGGTGATCCAGAGCAACTTCCAGCCACTGTAA   |
| 39718765 F 0-12:C>T-12:C>T | TGCAGTTGCTGTCACCATTGGTCCCAGTTTGGAGCCTCTGTCTCCGCGGTAATTTTGCAGGATTCCTCCC  |
| 39728758 F 0-67:C>T-67:C>T | TGCAGGCTGGGTATGTAGGGAGATGAAGAAGTGACTCGAATTATCTTGGTCTCTTTCTAGTTCACTTCA   |
| 39714492 F 0-7:T>C-7:T>C   | TGCAGAGTAGATGTGTCTGGTATTTTGGCCACAGCATCAATGATTCCTCGGACAATTTTTGCTGTTTTT   |
| 39717480 F 0-28:T>A-28:T>A | TGCAGGTATTCTTGTCTTGTGCCGATCTTCGGAATTATTTTCGTTCAATTTTGATAATGTACCAAAAT    |
| 46755806 F 0-15:T>G-15:T>G | TGCAGCTCAGAGTGCTGATGTTATCATGAGAATGATGGCTAGGAACTCCATGTCAGAAAAACTTGCTGA   |
| 39723815 F 0-55:A>C-55:A>C | TGCAGTAGCAGTCCCATCTGGTATAGCTTGAATCCGATCCGGCAATGCAAGCACCAAATCATTTCGAT    |
| 39725582 F 0-57:G>A-57:G>A | TGCAGAAGATAAGAGCCGGTGAGATCAAGGTGGTGACCGGAATAAAAAAATTCCGGCGAGGTGCAGTGG   |
| 39726073 F 0-18:C>A-18:C>A | TGCAGCATAAGAACATCCCAGAGTAAAGCTAGTTGCTAGTTCATAATTCTTCATGTGTATGTCTAACTT   |
| 39715938 F 0-66:A>G-66:A>G | TGCAGCCCCGACATTTCGTGACTTGACGAGTGTATCGAACAACCCTCTTGTCTCCAAACACAACCTGAAAA |
| 39721306 F 0-15:A>G-15:A>G | TGCAGAAGTCTCTAAAGACTTGGTGTGATTGGTATGCTTAGGAATGAGATTGACATTGGCCCTCACAG    |
| 46757512 F 0-36:T>C-36:T>C | TGCAGTTCACCCAAAAACCCCATACCAAAACCAACTTTATACATTTTCAAATAAATCATCTGAATCTTT   |
| 39714998 F 0-55:A>G-55:A>G | TGCAGATGCTATTGAATAACACGACACTACAGGCATTATATTTATTCGTTGTTTTAGTCGGCTACAAAA   |
| 39725018 F 0-34:T>C-34:T>C | TGCAGCTGCCTCTTGCTTGCCTTCCAAGATCTCCTTGCTTCCCAATCAATCTTAC                 |
| 39714746 F 0-18:A>G-18:A>G | TGCAGATAAGGATAATAGACCTTGCAAACTAACAGGCAACGACAATCCAGACGAGAATGTAAGTGGCA    |
| 39724041 F 0-63:A>C-63:A>C | TGCAGTGACAATGAACAATTTTCAGATGTACCGCCATATCAATGCACCAAGGATGGACTCTAGGATGGTC  |
| 39723592 F 0-60:C>G-60:C>G | TGCAGGTCATTGAGCTCTAGTACAAATATGGTAGATTTGACTGACAAACTTCCATATCACCTGTTGTAA   |
| 39726977 F 0-6:G>C-6:G>C   | TGCAGAGAAGTAGAACAACATTTGTTAC                                            |
| 39715781 F 0-12:C>T-12:C>T | TGCAGCATTGTTCTTGTCTATGTGTATCTTAGTGCAGAAATTTTCTCTGCAAGCTATTGGGTTTGT      |
| 39719580 F 0-14:C>T-14:C>T | TGCAGAGACGTATCCCCCTTCGAGTGGTAAGTTTAC                                    |
| 39717240 F 0-52:C>G-52:C>G | TGCAGGCTTTTCTTTCAATACTTTGTGGCATTATGATCTAGAAGCGCCAGTCTTTGGGTCCCTTGCAA    |
| 39715450 F 0-7:C>G-7:C>G   | TGCAGCACGCACATACTTTGGTGTGGAGTGACCCATGTAATAAAAGCCGACATATTCAGCATGAAGG     |
| 46771788 F 0-18:G>A-18:G>A | TGCAGAGGTAATGATACAGATGCAATTCAAAACTACTGAAATTGGAACACTCGTCTACATTCAAAGTA    |

|                            |                                                                             |
|----------------------------|-----------------------------------------------------------------------------|
| 39728384 F 0-11:G>A-11:G>A | TGCAGTCTCTTGTCTGTTCTGTCAATAGCCCGAACCATCTCTTTAGATAC<br>TCGCATTCCATCTCTGTT    |
| 39721133 F 0-16:G>A-16:G>A | TGCAGAAAACGTGCCCCGATTTTGTCTGTTGTTTCTTCGACCAATGGTTCT<br>ATGCAGATCGCACACCGCA  |
| 39714211 F 0-28:G>T-28:G>T | TGCAGACCTCCATTTACAGAGGTTTTCGCGACGGCATTTCATGAAGGAAGC<br>GGCTGCGCTGAACTTCACGC |
| 46768538 F 0-46:G>A-46:G>A | TGCAGAGATCACGGTGCCATGTAGGAACATTTTTGTATGTCAATCTGGCA<br>GTAACATCAAACATGATGA   |
| 46764609 F 0-59:C>T-59:C>T | TGCAGGGTTCGAGGGTTGTGTATTGTAATGTGCAAAGGGCTGGGAGTAGA<br>GTGAATTCATCATGCCCTGC  |
| 39717386 F 0-35:A>T-35:A>T | TGCAGGGTCCATATGTTAGTAATATTTTATTGGTGACTGAACAGGGTGAC<br>TTGGAATGAATCGTTTGCC   |
| 39718514 F 0-20:T>A-20:T>A | TGCAGTGTGATAACTAGAAATTTCTGCTCTGGTTGTTGGAGCTTGAAAG<br>CCACATTGCCATGGTGGTT    |
| 39722143 F 0-65:G>A-65:G>A | TGCAGATTATAAAGCAAAACAATAGATTTTGGGAGCTCTCTTATTCGAG<br>AGTGTGAAATGTCAAGGTAC   |
| 46754505 F 0-54:A>T-54:A>T | TGCAGAGTGAGAAATTAATACTTCATATAATGGTTACAATTTATCAC<br>AGGGAATAAGGAAGCTTTT      |
| 39723998 F 0-60:T>C-60:T>C | TGCAGTCTATATTCTCCATGCTCTTTCTGCAACAACCCCTTTTCTTCTAG<br>CCCCATTACTCCAACAGA    |
| 39717193 F 0-54:G>A-54:G>A | TGCAGGCTCTAATCTGTATTTCTGGATAGCAAGCATTCCGATTACTGTGA<br>GTGCGCTCTCTCTCTCT     |
| 39718314 F 0-5:T>C-5:T>C   | TGCAGTGATGGATAATAAGCCTCAAAGTTGCTTGCCAACGAAAATTTTC<br>AAGTGCTCCTTTCAAGATAC   |
| 39714561 F 0-19:C>T-19:C>T | TGCAGAGGAGAGAGAAACGCCGCTGGATTTTCAGAAAGCCAACCAATCA<br>CCATCAACAACCACGCCCA    |
| 39715873 F 0-12:C>T-12:C>T | TGCAGCCAGCTTCGGCGCCTCTGCCACGGCAAAGATTAGTGTGATGCTT<br>CTCTTGCTGGACCATC       |
| 39715955 F 0-56:T>A-56:T>A | TGCAGCCCTCTAGCAATTACGCTAGAAAGCCAAGGTGAGAGTTTACTTG<br>GTAGACGTATAACTGCTTGC   |
| 39726791 F 0-29:T>C-29:T>C | TGCAGTCCAGTCAATGCAAATCCTGAATTTGTAGCAGCTACTAGATTTCG<br>CCCAATCTTCTTCACATGG   |
| 39713825 F 0-41:A>C-41:A>C | TGCAGAAGCAACTCGCGAGTACCGAAAGGGGGCTTTTACCAGTGATCC<br>AATCTTTCTCAAGAACCA      |
| 39723377 F 0-62:G>A-62:G>A | TGCAGGCGGTGGGCCAGCTCCGCCGCTGAGCTCTGAGAATGGAATTCT<br>CAGACTCGACGGCGGCGTAG    |
| 39723501 F 0-24:C>T-24:C>T | TGCAGGGGTCCCCTTCTCTTGCATCGCGGAGAGCAGTCGTTTGGCTACGA<br>GACCCTTGCTGACGCCCTG   |
| 46756200 F 0-48:G>T-48:G>T | TGCAGGACGGATCCTTAGATCTCTATGCCTGTGATGATGAGGGAAAGTG<br>TATGCGGCTTTTCAATTTCTA  |
| 39725015 F 0-20:A>G-20:A>G | TGCAGCTGCAAGAATCTGAGACGATTTTCTCGAGCCCCGCCACCTCTTA<br>C                      |
| 46769895 F 0-36:T>C-36:T>C | TGCAGTGTGCTCATTTTTTGTGCAGAGATATATGCATAGTGTTCGAGTAC<br>TCATAAACTTTTCTTCCC    |
| 39725064 F 0-9:C>T-9:C>T   | TGCAGGAATCGGAGCCTGCCTACTATGGAGATCCATTAC                                     |
| 39714470 F 0-62:T>C-62:T>C | TGCAGAGATTGAGTGCCCACTCTATAATTCAAATTTGACCCATCGTTTTT<br>ACTCTCTCTCTCTGTAC     |
| 39714991 F 0-9:C>G-9:C>G   | TGCAGATGCCAATTGAATCTTGGGCTTGGCAGTGGAAATCTGATTGCTG<br>TTCCAATTCCAAAAGAGCA    |
| 39719481 F 0-7:T>C-7:T>C   | TGCAGAATTCTGAGGCGCTCATTGATTCTCTCTTCTCTTCTGCATTGGT<br>TAC                    |
| 39722523 F 0-48:C>T-48:C>T | TGCAGCATCATTAGGACCTCTTCTAGCTTGGGGATTAGTGGCTTGAGCCA<br>TCTGTTGGTTCCATTTAC    |
| 39716426 F 0-7:T>G-7:T>G   | TGCAGCTTCATTTTAGTTTCTTCAGATAGAACTTTTGTAACTACTCTATT<br>CTCCAAATTAC           |
| 39718126 F 0-34:G>A-34:G>A | TGCAGTCGAGCTTGATGCTCCCGAAGACCCCGAAGGGGCCATCATCATC<br>TTACCATCTCCATCTCCGA    |

|                            |                                                                           |
|----------------------------|---------------------------------------------------------------------------|
| 39717295 F 0-5:T>G-5:T>G   | TGCAGTGCACAATCACCAGAGAATCCTCGCCAAGAACTTCAAATTGATAGGCAGTAGTTGGGGCTATA      |
| 39725304 F 0-9:T>C-9:T>C   | TGCAGTGAGTTTATTGTATATTTTTCTAAAAAAGATTAGTCTCTATTAC                         |
| 39720684 F 0-7:G>A-7:G>A   | TGCAGTCGCTTGACGGCCTTACCCCGTCTCTCTTATATTAC                                 |
| 39729483 F 0-18:C>G-18:C>G | TGCAGGCCCTTCAACGTCCACTCTCATATGATGGTACCCCAATCTTTACTATCGAAGTACGTTAC         |
| 39719452 F 0-42:T>G-42:T>G | TGCAGAATCAACCAAAAGAGAAGTCCATTTTCAGCACAAAACCTGGACGCTTAC                    |
| 39719352 F 0-5:T>A-5:T>A   | TGCAGTACACAAAATTCAAAGAAACCACCTATTAC                                       |
| 39720872 F 0-46:A>T-46:A>T | TGCAGTTGTTTCGACAGGTATGGTACTTTGAGCATAAGAAATGAAATATGTCTTTAC                 |
| 39729487 F 0-57:C>T-57:C>T | TGCAGTTCTCGACAACACTACAGTGAAATTTTGAAATCTTGTAATGCTCTGGACTACCACGACTTAC       |
| 39713960 F 0-6:A>C-6:A>C   | TGCAGAATAAAGCTGGCAAGCGAAAGATGGTAACTCATTTCCTTGACCCTCTAGCAAGAACCACAGA       |
| 39715118 F 0-51:G>A-51:G>A | TGCAGATTCTGTATATAGAGCATGCTTTGAAAAGGTTATCATTCAAATGAGAAGTACTACAAGAGGTA      |
| 39728383 F 0-17:C>T-17:C>T | TGCAGTTTCTAAATGTTCCATATTTATTTTTGAAGCCTCAAGGTTTTCTGAAAATAAAAGTAAGATAT      |
| 39722854 F 0-61:T>A-61:T>A | TGCAGCTACCGTCTAAACAAAATGCGCATTTCAGAACCAAAATCTCAGTATGCCTCTGTCTCTCTCC       |
| 39728448 F 0-26:C>T-26:C>T | TGCAGAGAACCCGTTATCGGCAACAACCTCCCTCTAAGAATAAAAGCTTAC                       |
| 39726593 F 0-30:C>T-30:C>T | TGCAGTACCTGAAGGGGTGGGCAAAGAAGCCTATGCCTCAGTTCAACTAAGTTACAAGTATGTAGAAGG     |
| 39721699 F 0-29:T>A-29:T>A | TGCAGAGAAATCTCTCTGTTCTGACACTATAGCTTCTTCAACAGTACTGGGAAAGCATCAAAGAGACAA     |
| 39713392 F 0-20:T>A-20:T>A | TGCAGAAAAAGAACATTTATTGTTGTGATGCATGATGTGGAAATTGTCTCTGGCAATGAATTTTAGTG      |
| 39718885 F 0-36:T>C-36:T>C | TGCAGTTTCTCAGGTGCGTTTCGATGGTTTCAGATGGTGCTGATATGATTGACATTGGTGCTCAGTTCGAC   |
| 39717688 F 0-55:C>T-55:C>T | TGCAGGTTTTTATCCACAGGCTTGTCAATGAGGGTATGTAAAATTTTTGAATGCGTTAGAAGGGGCA       |
| 39718393 F 0-28:G>C-28:G>C | TGCAGTGGAGCCAAAATCTAGCGAATCTGACAGATCGACTGGTCCGATTCCAACGCAACCAAAAGGGGT     |
| 39716341 F 0-8:C>T-8:C>T   | TGCAGTCTCCTCCGACTATTTTTCTGCCATCCGCTTGATTCTGCCTAGCCTCGATCGAGAGCGCGGCACC    |
| 39717581 F 0-28:T>C-28:T>C | TGCAGGTGTGGCTTTATGATGTTGGATTTGGAAGTTTTGTTTATCAAGTTGAAAAGGTTTGTGATAATT     |
| 39728228 F 0-35:G>A-35:G>A | TGCAGATTCACTCCTACATCTTCGTCGTACTIONCAAGGCCAAGTTCTTCTGCAAGAATACAAAGAATTTA   |
| 39717429 F 0-59:T>A-59:T>A | TGCAGGTAATTTTGTAAAGTGTAACTTGTCTAGGGTAAGTAACTTCTACAATAAATTGGAGCATT         |
| 39717276 F 0-35:G>C-35:G>C | TGCAGGGAGCGGGCCTTGTCTTCCAGATATCAGTGCGGTCGATGAAATCACAGCCATAGCATTGAC        |
| 39726234 F 0-49:A>G-49:A>G | TGCAGTACCCGAGAATATGCACCACTGGTTGAAGAGTTGTGGAATGATACTGCTATTCAGGCTACCTA      |
| 39713768 F 0-45:C>G-45:C>G | TGCAGAAGAAGATTGAGAAACATAGTAAATATTGATGATGCTCATCAGGCTTCTCAATAAGTAAGAAGA     |
| 39727920 F 0-52:A>T-52:A>T | TGCAGTTTGTCAATCTTGATTTGCTTGAAGTCAAGGTACTIONTACAAATTACAATAATTTCCGTTGGTTGGA |
| 39721958 F 0-13:T>G-13:T>G | TGCAGATACTGTCTGGAGAATATATGCAGTTCACCTGATATGCTAATCTCTGTCTTGGCTGGTTTGTCA     |
| 46757615 F 0-22:T>A-22:T>A | TGCAGTTGATAAGCTCGTTTCGCTTGGGCTTTGATAGAACAAAGAGGTATCTATGTATGATCTAGATGTTA   |

|                            |                                                                        |
|----------------------------|------------------------------------------------------------------------|
| 39725522 F 0-48:C>T-48:C>T | TGCAGAAACTGAACCAACTTCCAATTTGTATCTTACTGACTGGTAATCCGTAATGCAGTTGTTACTGGAG |
| 46755056 F 0-30:G>T-30:G>T | TGCAGCAAGGGACAATTTGGAGTTCTTGGAGAAATGGTTTGTTCAGATCCACATTACAGAAACAGAAG   |
| 46755574 F 0-24:C>T-24:C>T | TGCAGCCGTGGTAACAGATTGAGACGGTCTCCAACATTTCTCAGCTCCCAGCAGATATCCTAAGCCC    |
| 39721271 F 0-39:T>A-39:T>A | TGCAGAACCAAAAAAATGTATCCAGAGAATCCAAAACACTATTAGCAGCCTAACAAAATTAGCATGCCT  |
| 46754390 F 0-39:T>C-39:T>C | TGCAGAGCCATGGATTCATAACACCACTATCTGGGAAGATGAAGAACTGACCTCAAATGTTACTGTGGA  |
| 46762309 F 0-23:G>A-23:G>A | TGCAGAAAAAGCTGGTGCTAGAGGATTTCAATATAGTGGATGCAGCAGGTGGCGTTGGTAAAGCAGTCA  |
| 46765077 F 0-19:A>G-19:A>G | TGCAGTCTGTAATTACCTCATAAATCATCTCCTTCATACCTTTTCCTCATGAGGATGGTTGTTGTTTAG  |
| 39713273 F 0-47:T>A-47:T>A | TGCAGATGTTAGGAAACCACCGTGGTTATTGTCTTGAATACATGCATTAGAAAAATAGTGGAAAGCAA   |
| 39723161 F 0-13:T>G-13:T>G | TGCAGGAATGGATTCAATCTGCTCCTGATGTAAAATTGCATCTACCAGCTCCGAACATTTTCATCCCCA  |
| 39725065 F 0-12:A>G-12:A>G | TGCAGGAATGTTAGTTTAGTCATCTTGTACACAATTAC                                 |
| 39729043 F 0-60:A>G-60:A>G | TGCAGTTTCTGTTTGTCCAAACAAATAAAAATTGCACCATCAAACATTTTCAAATGCTTTAGAATCAGT  |
| 39729517 F 0-19:T>C-19:T>C | TGCAGATCAGAACATTGAATGCAATTAC                                           |
| 39718751 F 0-33:A>C-33:A>C | TGCAGTTGCATGGTCATATCTTTCAGCTAAGGCACGGTAAGCTCGGTAGATTCTCAACTAGTTTCAT    |
| 39727204 F 0-42:A>T-42:A>T | TGCAGTAGTAAACAAATATTGTGAATGTTTTGCATTTTGCTCAATCAGTTCTGAATATTAC          |
| 46755817 F 0-20:C>T-20:C>T | TGCAGCTCCAAGAGAAGTGGCTGGTAAAACATGAGGGTCGGCAAAAAGCTCCTCCCCTTCGAGTTGTGT  |
| 39721343 F 0-32:C>G-32:C>G | TGCAGAAGACAGTGACCATGCCGAGAGTTTACAACATAATGTTTCGTAGACTTGGTCAAGCAAATTACCA |
| 39727451 F 0-20:T>C-20:T>C | TGCAGAGGATGCTGATAGTGTGAATCTGAAGGAGGTACAAGAAAAAAGAAGGGGCCTTCTATGTGTG    |
| 39725013 F 0-12:C>T-12:C>T | TGCAGCTGATTTCCATACATATCAATAATGTGGTCTCATTGGCAAATCATGTAAGTTAC            |
| 39721920 F 0-31:T>C-31:T>C | TGCAGAGTGCCTTCATCAACCAAGATAGACATATGTATCATGAGGAAAC TGATAAGCCAGCTCATGCC  |
| 39717868 F 0-55:G>T-55:G>T | TGCAGTAGACACCACAAGAGA ACTATCCCATTCATCTCATTTTGGACAATCATGTGCATCATCAAATC  |
| 39721118 F 0-46:C>T-46:C>T | TGCAGAAAACAAAAGAGCATGTGTTGGCTTCCAAAATTATAAACAGCGCCACTTACTTTTGCTCCTCT   |
| 46760835 F 0-23:A>C-23:A>C | TGCAGCAAGTATAAACACTATTCATGTCATTACCTTCCTTTTCGCTCTTCTATTAC               |
| 39720047 F 0-8:C>T-8:C>T   | TGCAGCCCCTTCTGCTTTCTGGATTTACTTTTTTACTTTTAC                             |
| 46774452 F 0-30:A>G-30:A>G | TGCAGAGGATGCTGATAGTGTGAATCTGAAGGAGCTACAAGAAAAAAGAAGGGGCCTTCTATGTGTG    |
| 39724671 F 0-5:A>G-5:A>G   | TGCAGAATGCTGGCTTTTTTATTAGAGGAAAGAGAGATAGATTGAGATTAC                    |
| 46755216 F 0-57:G>T-57:G>T | TGCAGCAGCCCTGATGATCAAACCGACATATCATTGCCTTGAAATAAAA TGCAATGCGTTCTATCGGGA |
| 39720617 F 0-23:C>A-23:C>A | TGCAGTATACAGATGTGTACAGCCACAAAAGAAGCGATACGTTAC                          |
| 39721657 F 0-53:C>G-53:C>G | TGCAGACTCAGTTGCTTGGCACCGGCTAGAGCTGCAATTCCTGAATCTGTGATCGAGCATTTTGAGACA  |
| 39717049 F 0-7:A>T-7:A>T   | TGCAGGCAAGCCCTCAGATCCGAAAATTTCCCTTTGTTGTTT TAGGA AATAAAGTTGATGTTGATG   |



|                            |                                                                         |
|----------------------------|-------------------------------------------------------------------------|
| 39725456 F 0-14:C>T-14:C>T | TGCAGTGGACAGAACACAGAGCATGGAATGTCAAACATACACACTCTATTTGTTCTGTCCTTTACTGCA   |
| 39718486 F 0-49:T>C-49:T>C | TGCAGTGTATTGATCCACATACGCGTGAGTATGTTGAAAGACTCAGAGATGAGCCAATGTTTATGGTTC   |
| 39717691 F 0-13:G>A-13:G>A | TGCAGGTTTTTTGAGCAAAAATCAAAGTGGAGAAGTTGTAGACTTGCAGTGTATTTTGTATTGTCCTTCT  |
| 39725956 F 0-63:C>T-63:C>T | TGCAGCAAAAATCAGCAATATACAAATCCGTCGTGGGTGATCCTAAATTCTTCAAATTTTAGCGGGCA    |
| 46756457 F 0-12:C>G-12:C>G | TGCAGGCGGCGGCGCCCAAGGCGAACTTGGTGGTGCGCAGGATGGGTCGGGAATTTTAGGACGGTTC     |
| 39715644 F 0-42:T>A-42:T>A | TGCAGCATAAACATGATAAACATGTATAATTACAACGTATATTGCAACACATCAATCAAAAATCCAAATT  |
| 39719598 F 0-55:A>T-55:A>T | TGCAGAGATTGCAGATAGTAGAAAGGCATATAAGTAGATGCGGGGATGCCGTCGAGTTAC            |
| 39721042 F 0-56:C>G-56:C>G | TGCAGAAGTCTCCGGCGGCTGAATCTGTTCGCACAACATCCTCGACGACAAGTTGAACTTGTTCGGGGTTG |
| 39715392 F 0-25:A>G-25:A>G | TGCAGCAATTCACAAGTCAATTTGAAGTTTCAAACCTCTTTCTTTGTGGAACTGCAACTCCTCTAGA     |
| 39714906 F 0-11:G>A-11:G>A | TGCAGATCGGTGGCCGGAACGGTGACGAGCGAGGGGCAGGGGCCTTGGGTGATGAAGACGTAGCTGGTG   |
| 39725200 F 0-43:T>A-43:T>A | TGCAGGTTGATCTATTTACAAGATGGATAAAAATATCATTTTACTCTTAC                      |
| 39718243 F 0-54:G>A-54:G>A | TGCAGTGAACATCGTTGCCACAGTGAATACATCAGTCGGGTATTGTTCCACCGAGGAAGAAATGGAACGA  |
| 39724272 F 0-40:T>C-40:T>C | TGCAGTTCGAAATTTGGTATTCTTCGATTATATTTTCATATGCCTGGTGTTTTCCTGATAGGAGCTTC    |
| 39716135 F 0-57:G>T-57:G>T | TGCAGCGCAAGAAGGAACAGTGTACTAAGCCCTGTCAAAGAACGCCACACCAAACAGGAATGCTGAAG    |
| 39717016 F 0-68:A>T-68:A>T | TGCAGGATTCCAATCATAAAGCTTGAACGATATTCGGCCTGTTGGACACTATAACAAAGAGATTTGGAA   |
| 39728087 F 0-33:A>T-33:A>T | TGCAGTAGAATGCTTAGGAAAATAAGTATCTATACGCATTTTAC                            |
| 39723627 F 0-27:T>C-27:T>C | TGCAGGTGCATAACACTTTTATTATGTTTACAAAGTGAATGAATGAAAATAATTTACTCATTACACACA   |
| 39714401 F 0-5:A>G-5:A>G   | TGCAGAGAGAAAAAATAGCGAAGGCTGAGAGCATAAGAATGGCTAAATCTCGCTTCCTCATATTGTTCT   |
| 39723778 F 0-35:C>T-35:C>T | TGCAGTACAACCTTCTTCTTCTTCTTCTTCTTAGTCGGATCAAAGGGGGCAATCTGCACAGAATAAAC    |
| 39714899 F 0-13:T>G-13:T>G | TGCAGATCGACGATGAACACCATCATTGAAAGAGGCATTATCTAGTGCCATTTTGTCTTCTTTTCGATAG  |
| 39718032 F 0-30:A>G-30:A>G | TGCAGTCACCGCTGGCTTCAAATCATCGTCACCAATTGATCGAGTCACCTGTCCAAGCTCAAAGAGGC    |
| 39716989 F 0-43:T>C-43:T>C | TGCAGGATGAATCGGAGTTAGGCTCCGATTGGAAGTGGAGACTGGAGTTAGGGGTTTGGAGGGCTTGA    |
| 46756753 F 0-58:G>C-58:G>C | TGCAGGTCTCACAAAGCGACCTTGCTGTCAGGGTCTGAGCTAGGCAGGCGTCGAGCACGGCATCAGAGA   |
| 39715952 F 0-33:T>G-33:T>G | TGCAGCCCTCATGCGTGCATTCAATTGTCTTTGTTGGACCTTCACTTTCATGCTTCTGTCGTAGATGTT   |
| 39715582 F 0-57:G>T-57:G>T | TGCAGCAGCTGGATTACTTGAGAAATTGAGTGTTGAAGAAAAGAAAGCTGATGAAGGGAAAGCTGGGGA   |
| 39728792 F 0-61:G>T-61:G>T | TGCAGTTGGTTCATATAATCATTGGAACAAGTTCATGGGCTGTCCACTGTGGCTCCACAGTGTGGGA     |
| 46754269 F 0-52:T>C-52:T>C | TGCAGAGAAAGATTGCTTTGCCCTGCAAGGCTGTAGAGGAAAAGGGTCTATATATGCAAATTATGCC     |
| 39723326 F 0-26:T>A-26:T>A | TGCAGGCATGCTTTGCCACACTTCTTTTGTGCTGAGATCTTTATCTTTCTTTACGTTGGCATGGAT      |
| 39723688 F 0-22:T>C-22:T>C | TGCAGGTTGTGATGTTGGCCCTATTTTCATTTTGGCATTGTCCACAGTGTTTGGCAAGTCTCCGAG      |

|                            |                                                                         |
|----------------------------|-------------------------------------------------------------------------|
| 39727272 F 0-21:C>T-21:C>T | TGCAGTTGTCAACGATGATGACGAAGATGACGACGACGAAGTGCTCGAGCTTAC                  |
| 39718430 F 0-29:A>G-29:A>G | TGCAGTGGCTTCTCACTCACTGATTTAGGACACCCTAGGGTAACTTCAACATAGCAGTTTTGCCCTTC    |
| 39726746 F 0-23:T>C-23:T>C | TGCAGTGGCTATCATCTTGAGATTCTTGTTGCCAGTCTTTGCAAATGAAAATGCATAAACCAATGGAGG   |
| 39725474 F 0-48:C>A-48:C>A | TGCAGTAACTAGCAGCACAAAAGCTAAAGGCAAAAATGGAGACTGTCCGC CAAAAACGGCAAGCTGGGG  |
| 39715753 F 0-5:G>C-5:G>C   | TGCAGGATTAGTTTTACACAGAGGGTTTCAAATTCCAATTACCATCTCATCTTCAATCACTAACTTTT    |
| 39722226 F 0-15:A>T-15:A>T | TGCAGCAAAACCTCCATGATGAGCCTCCTTTTACTTACACCCCAATCCCTAAATTTCTAAGAGGAATCT   |
| 46756041 F 0-5:C>T-5:C>T   | TGCAGCTTGGTGAGTTTTCTTCCGAGTTACCAGAACGACATGTCGTCGTCGGTGTCGTCGGAGGAGGAG   |
| 39724635 F 0-18:T>G-18:T>G | TGCAGAAGAACTTCTACTGCTTGTGATGACAATCCCGATAGGTTGGAA TTAC                   |
| 39721884 F 0-66:T>A-66:T>A | TGCAGAGGTACTAATGCAAACATCGGCCAATCTTGGATTGTTCAACTCATTCCATTTTGCCTGAATTC    |
| 39714069 F 0-20:T>A-20:T>A | TGCAGAATTATATACATATATAAAGAAATCAGTTTTCTACAATGCTAACA GCAACATTCATCTGGTTGC  |
| 46776397 F 0-30:C>T-30:C>T | TGCAGCGCCGCCTAAGTGTTTCGATTGAGTTCGAATCACTTAC                             |
| 39726875 F 0-44:G>C-44:G>C | TGCAGTTTTCTATTTTATTCTTGCATATTTTTGTGGTAACTCCAGCTCCG TAAAAGTGATATAGCATG   |
| 39715140 F 0-45:T>A-45:T>A | TGCAGATTGCTCCGAACAGATTCTGTATGAAGCGTCTTTCAAGGATTTTGGAGATAACAGTGTCAATA    |
| 39721273 F 0-25:T>C-25:T>C | TGCAGAACCAAATCCTCGACTCGGCTGAGTCGTCGAGTTCTGGAGGTA TCAAACCGCTAAGACCACAC   |
| 39715080 F 0-67:C>A-67:C>A | TGCAGATTATATCACAAATAAACAGCTCAGAGTGAAGCACTAAATATT TATTCAGATACCTTGGGGCA   |
| 39724895 F 0-19:T>G-19:T>G | TGCAGCACTTGCTCGACTCTTACTTTAC                                            |
| 39722701 F 0-7:G>T-7:G>T   | TGCAGCCGTCATTCGTCACCGTGTGCGGCACACAAATTGTATTGAATAAG CCGATTTCTTTTCTTTGAA  |
| 39728663 F 0-5:T>C-5:T>C   | TGCAGTCAAATTACTCCTTATTTTTTTAGGATCCTCATCCATATTATTAC                      |
| 39726930 F 0-16:C>A-16:C>A | TGCAGAAAACCTTGCATCAAAATTATCTTAC                                         |
| 39721138 F 0-53:G>T-53:G>T | TGCAGAAAAGAGACACTTCAATCAGCATATCATTTTCAGAAGTTTTATGCT CGAGAAAGAAATAAAGGGA |
| 39720270 F 0-12:G>A-12:G>A | TGCAGGAAACGAGTCTAAGAGATTAC                                              |
| 39727527 F 0-57:A>T-57:A>T | TGCAGCAATATGGTTTGCACTTTTCATCTCCTTGAATTTGACCTAAAAGA ACAAAGCATTCACTTTTT   |
| 39724157 F 0-26:C>T-26:C>T | TGCAGTGTCCACCGTTTGGCTCTCCGCTGTGGCGCAGCTGCTATTGATCT GATCGGCAGTGACTTCCAA  |
| 39727819 F 0-52:T>G-52:T>G | TGCAGTCTGAAGATTCCTTTCAAACAGATGATTATGAACTTGTTATTGTT GATATTTCAAGAGCTGCCCA |
| 39723477 F 0-12:G>A-12:G>A | TGCAGGGCTGGAGTATTTGCACAATCTTGCAAGCCACCTATAATTCACA GAGATTTGAAGACTTCAA    |
| 39714088 F 0-21:A>G-21:A>G | TGCAGAATTGGTGTCTTTTCAGAAAGGGAAAACCTGTACCAAGAGATCAT AACTTTCTGTCATTCAATTC |
| 39720189 F 0-19:G>A-19:G>A | TGCAGCTGAGTCAAATGAAGTGGCTCTTCCCTTAC                                     |
| 46756767 F 0-26:T>C-26:T>C | TGCAGGTGAACCGGGAGACCGGGCGGTTGGAGCTGGTTTGTAAACAATGC CGGCTTCTGTTTGTGAATG  |
| 39713565 F 0-8:G>T-8:G>T   | TGCAGAAAGGTGTTTTTTCGAATTGCAATTGCAACTATGCTTCTGAAAAA TCTATCGTCACACGTACTC  |

|                            |                                                                            |
|----------------------------|----------------------------------------------------------------------------|
| 39715077 F 0-42:C>G-42:C>G | TGCAGATTAGTTCGTCTACGGTATATCCTTTCTTGATGTACGCAGTGACT<br>TCGTCCGGGGTCGCTTACT  |
| 39729487 F 0-45:T>C-45:T>C | TGCAGTTCTCGACAACACTACAGTGAAATTTTGAAATCTTGTAATGCTCTGG<br>ACTACCACGACTTAC    |
| 39717037 F 0-41:G>A-41:G>A | TGCAGGCAAACATCACTCTTTGAGATGCTACATCCATGTGGGATCTTTAC<br>AAAGTCCAAACTAAGATCA  |
| 39722143 F 0-25:A>C-25:A>C | TGCAGATTATAAAGCAAAACAATAGATTTTGGGAGCTCTCTTATTTCGAG<br>AGTGTGAAATGTCAAGGTAC |
| 39723735 F 0-45:A>C-45:A>C | TGCAGTAAAGTAAATGAGAAAAAACTATTTAGTAGTGCCTCAAGAGAA<br>CATGGATTTTCATAAAAGGG   |
| 39727176 F 0-9:G>T-9:G>T   | TGCAGGTCTGGCTAGGACATAAAATGACTTTAC                                          |
| 39721654 F 0-29:A>G-29:A>G | TGCAGACTATTTCCACGTTCACTTGAAAGATAATGAAGAAATATAGATA<br>CAGATTGAGCCTCACTTTGG  |
| 46753791 F 0-19:A>G-19:A>G | TGCAGAACAGCGGCAGCCATTTGGGTACTTTCCAATGGGTTTCGATCCG<br>GGTCCACTTTCCGGTGACCG  |
| 39718959 F 0-22:C>G-22:C>G | TGCAGTTTTCTTTACTTATCTCCGTGCGATTTTCAAAAATATTTTTAGCCA<br>TGCGGAGCAGATTTCTCA  |
| 39721750 F 0-41:C>T-41:C>T | TGCAGAGAGTTAGATATGATCGAGTCTTCCCTCCTTTGATGCACTTTTGC<br>CTTCAAAAATTTGAAGATT  |
| 39727490 F 0-18:A>C-18:A>C | TGCAGATGCTGACAGCAGATAAACAGAACACGTAAGTGGTTATACAA<br>TAATTTCTAGAGTTGCTACA    |
| 39714127 F 0-48:A>C-48:A>C | TGCAGACAAGTATCCGAGCCACGTTTCATCCGAAGCTTCCCGATTACGAA<br>GAAATCGCAGACAAATTCAT |
| 46755528 F 0-43:A>T-43:A>T | TGCAGCCCCGCTTAAGAAACGAAGGTTAGTTGAAAATGCCAAAAGGAAA<br>ACGGGAGAAGAAATTCATC   |
| 39716127 F 0-48:C>G-48:C>G | TGCAGCGATCTTTAGATCTTCTCTATGAGGCTTGTGGCCGGATTGTCA<br>ATCCGATTTAC            |
| 39714961 F 0-18:T>C-18:T>C | TGCAGATGAGTATTCTTTCCCTCATATCTTCTGTATAAACTTTTCTTTGT<br>ATCGATTAGAAAGGAAAA   |
| 39724594 F 0-46:T>A-46:T>A | TGCAGAAAGAGTATTAGATGATTGGCTTCACTTGTCAATGGGGCAATGC<br>TGATTAC               |
| 39728625 F 0-34:G>C-34:G>C | TGCAGTTCAACAGTAGAATAAAAGAAATGCTTATGAAATAATTCTTTTTC<br>TTTTGAAATGAGCAAAGTA  |
| 39725070 F 0-14:A>G-14:A>G | TGCAGGACCAAAGAACCCGTTAC                                                    |
| 46755683 F 0-14:C>A-14:C>A | TGCAGCGCAGACATCGCCGCCCTCGCAGCGGCAGTCGGCCGGAGGAAG<br>TAACGACTCGATGGTTTCGG   |
| 39729519 F 0-14:C>T-14:C>T | TGCAGATCAGAAAACCAAACACCATTAC                                               |
| 39722376 F 0-7:C>T-7:C>T   | TGCAGCACTACAAGAACTGAGAGTACCATCGACAGCAAAGAGTTGCTT<br>ACAATTATCAGTGCCTGAAA   |
| 39723730 F 0-35:G>A-35:G>A | TGCAGTAAAGAAAATTCACGAGCACTATCAAAGGCGAGCTTTCTTTCTA<br>GGCTTCAGTCAGTCTCCGGC  |
| 39716232 F 0-65:T>A-65:T>A | TGCAGCTAAATTTACACAATATGTTTAGGGGTTGATGGAGAGGTAATTT<br>TTAGGTTTGTGAACTCGT    |
| 39722399 F 0-21:C>G-21:C>G | TGCAGCAGACATAAGCCCCATCAGAAGAAAAAATGAACTCATGCTTCGA<br>TGCATTTTACGGTCTTTGA   |
| 39722777 F 0-9:G>A-9:G>A   | TGCAGCGATGTTATCTTGCAGCTCCTTACCTTTTTGTCTTCTCCTCGAC<br>CAAATCTGCATGTCACG     |
| 39718424 F 0-45:A>T-45:A>T | TGCAGTGGCTCTCCAACATATGGTTGGTTCAATTTGGACTTGTGTTATGCA<br>CGTAATTGTTGAGTTCAAA |
| 39722126 F 0-20:C>T-20:C>T | TGCAGATGTGCCTGAGATTGCTGAACTGGTCTTCGAGTTGAGGTGGATC<br>CAAAAACCTCGACAGGCTAA  |
| 39723157 F 0-7:A>G-7:A>G   | TGCAGGAATGAACTTGTGGGTCATCATATTCATCTTGCTAATTGCCATTG<br>CTGCATATTTTCATCAAGAA |
| 39723477 F 0-6:G>A-6:G>A   | TGCAGGGCTGGAATATTTGCACAATCTTGCAAGCCACCTATAATTCACA<br>GAGATTTGAAGACTTCAAA   |

|                            |                                                                        |
|----------------------------|------------------------------------------------------------------------|
| 39718674 F 0-63:A>G-63:A>G | TGCAGTTCTCCTGGTTTGTGGAGTTCTCATGGGAATTGAGTTGGTACCAGCTAAATTGGCTTCATGTTT  |
| 39716821 F 0-51:T>G-51:T>G | TGCAGGAATGGCTCTCCAATAATTGCCATATAGTTTACCATTCTAAACTTTTATATGTTTTGTGACAT   |
| 46754021 F 0-36:C>A-36:C>A | TGCAGAATATGTAATGATCAGTACCAAAAAGTTGGCTTCAGTAATATTTATTGATAATTTCTATAGT    |
| 39726766 F 0-27:C>G-27:C>G | TGCAGTGTGGACATGCCTGAAAGAGACCATTGAGAATTTGGTGTCAATTCTGGGAGTATCCAGCCAGT   |
| 39717497 F 0-57:T>C-57:T>C | TGCAGGTCATTTTCTTTGAAATACTTTATTTATTGATAATGACAGTCCATGTATTGTTCAATTGCGATG  |
| 39727338 F 0-32:C>T-32:C>T | TGCAGAAACGCTAGTCTTAGACGAGCTGTCTGCCTCTCACTTGCATACATCCAACACCCAATTTCTATA  |
| 39713592 F 0-20:A>G-20:A>G | TGCAGAAATCAAATTGTAATACTGTTGTGTTTCCAAATATTGACATGTAAGATGATTTTTTTCCATTA   |
| 39713705 F 0-61:C>G-61:C>G | TGCAGAACCCAACCTCTTCTTCCCCATTTACTCCGCTGCTTCAACTTCCTCGACATCAACACCACAGTT  |
| 39716591 F 0-14:C>G-14:C>G | TGCAGCTTCTCGACCACGACCTTGATGCCGTTCTTTTTCTTCATGGTTCTAGATTTAGCCATATGACCA  |
| 39714237 F 0-7:G>C-7:G>C   | TGCAGACGATGCGTCTTCTAGATCACCCAAACGTCGTGTCCCTGAAGCACGTTTTCTTCAACGACTG    |
| 39715579 F 0-9:T>G-9:T>G   | TGCAGCAGCTGCTCCACCAGCCAACATTGGCCCCATGCCGTGGTGTCCGTGTCCATGGCCTGTAACGAA  |
| 39714514 F 0-59:C>T-59:C>T | TGCAGAGCCTAGATTTATTGAGCAGCAGTATCCTTCTCAATTCTGAAGTTTCAGAGAAACCGGTGACTT  |
| 39726049 F 0-67:G>A-67:G>A | TGCAGCAGCATCATTACGGGACTTGTATGTACAAGGAATGTTACGAACTTCATCTCTCAACACACGAA   |
| 39725542 F 0-5:A>T-5:A>T   | TGCAGAAATCAACAGACGGTGGACCACCCACAAGTTCACTTTGTCCGATGCGTACTATTGCTACTTAC   |
| 39725690 F 0-41:A>G-41:A>G | TGCAGAGAAATTGCCAGAGAACTGTCCACGTGAAGCACTTCACTTTTTTGAGGCCTCCCCACCCAAAA   |
| 39727301 F 0-38:T>A-38:T>A | TGCAGTCATTCTCCTCTCAATCCAAGAATTCATATATTGCATGTCTAGGATAGTTTCTCATTATCCTT   |
| 39728541 F 0-28:A>G-28:A>G | TGCAGATCATCTCCAAAACAGAAAGCACAAAGTAAGCATACTCCTTCAACCATCTAAATCCAAGTCGAG  |
| 39725751 F 0-45:C>T-45:C>T | TGCAGAGCCGAAGCTTCGAGCCGGGTTGATACCGGCGCCGGTGACCGGATGGTGGCCAAATTCACCAC   |
| 39715675 F 0-22:A>T-22:A>T | TGCAGCATATTATGAATTTGTCACAGATTCAAAGATTCACTCGTTTGTTGAAATTTTTGATATGCAATG  |
| 39726161 F 0-18:C>A-18:C>A | TGCAGCCTAAAATATTCACCATTCCGTATCATCAGTCAGCGAACCATACAGTAAGTTTCTACATGTGAA  |
| 39723709 F 0-24:G>A-24:G>A | TGCAGGTTTTTTTTGGATTGTCCAGTGAAAACAAATAGAGGATACCTTTTGGTATGGCTTTGGTTGCTT  |
| 39720109 F 0-6:G>T-6:G>T   | TGCAGCGGTGGCGGCGGCGACCGCGATGGCGTGGTTTCTGTGCGCGGCCGTTAC                 |
| 46757525 F 0-42:T>A-42:T>A | TGCAGTTCATGAAAGACTTCTTCGGACAAGTGAAGACTTTGTTTGGCCTGTAGATTCAACCTTCCATGG  |
| 39722176 F 0-21:C>T-21:C>T | TGCAGATTGAACGCATATCATCTCGATATCAGCCGTCCCTTGTTTTATATAGTCTTGGGAACAACTTTT  |
| 39719505 F 0-18:G>T-18:G>T | TGCAGACAGTCAATTCATGTTGGAAGGCTGACTTAC                                   |
| 39726161 F 0-11:A>T-11:A>T | TGCAGCCTAAAATATTCACCATTCCGTATCATCAGTCAGCGAACCATACAGTAAGTTTCTACATGTGAA  |
| 39723157 F 0-43:G>T-43:G>T | TGCAGGAATGAACTTGTGGGTCATCATATTCATCTTGCTAATTGCCATTGCTGCATATTTTCATCAAGAA |
| 39715382 F 0-18:T>C-18:T>C | TGCAGCAATGGACATCGATCACTATTCCTTTTCTGCTGTGCTCAGATCATGCTCAGATTTGGCTACCTT  |
| 46754535 F 0-50:T>C-50:T>C | TGCAGAGTTTAGATACCACATATTCTCCAAAGAATTGCCTCTTGTAAGTTTCTTTTTCTATGTCTCA    |

|                            |                                                                           |
|----------------------------|---------------------------------------------------------------------------|
| 39716636 F 0-67:T>C-67:T>C | TGCAGCTTGTTTCCTTTCCAACCTCTTTTATTCTCTGAGATTTAGATTTCAAATGGATAAACCAATTCTT    |
| 39714269 F 0-58:A>G-58:A>G | TGCAGACTATGGTACAGCGTCTACAGGGGATGGAGCAGCGACAGCAGCAGCAGATGATGTCATTTCCTTGCAA |
| 39724160 F 0-15:A>G-15:A>G | TGCAGTGTTCGTTGAGAGGAGAGTAGCTCCAGCTTTCTGATATCTGTCAATCGAGAGATCAATCTGTCTAG   |
| 39714983 F 0-26:A>T-26:A>T | TGCAGATGCAACAACATAATTAGAACACTGATGCAAGAACGCAAACAA GATTGACCAAAATAGAGCCAA    |
| 39723998 F 0-48:T>C-48:T>C | TGCAGTCTATATTCTCCATGCTCTTTCTGCAACAACCCCTTTTCTTCTAGCCCCATTACTCCAACAGA      |
| 39727916 F 0-45:A>G-45:A>G | TGCAGTTTGAAGGTCGAACTTTGGGGTATAAAGGATGGTCTCCCCATAATCATTCTCAAGCTTTTTATA     |
| 39721623 F 0-49:A>G-49:A>G | TGCAGACCTGTCACCTGGTCCAAAGTTGTACCATCTAGAAATTGCATTGAGTCACTATAAGAACTGGTC     |
| 39716284 F 0-19:T>C-19:T>C | TGCAGCTATATGATTTGATTGAGCTGAAAGTGCAAGGAGATGGTAACTGCCAGGTTAGTTCTTCTTACT     |
| 39716049 F 0-14:T>A-14:T>A | TGCAGCCTCTCTGCTCAGGCCCTTTGTAGCTTGCAGAGATGGTTGGATAAAAGTGGATGCCAATGAGTG     |
| 39724043 F 0-50:G>A-50:G>A | TGCAGTGACAGACAAATCAACATCTCTTCTCCACATGGAGAATTGGGCA GGTTC AATTACAAAGTAAAT   |
| 39715084 F 0-34:A>T-34:A>T | TGCAGATTATTGACATCTCTCGAAACAACCTTTACAGGGAATATATCTGGGAGAAGCCTAGCAACATGGA    |
| 39719944 F 0-25:T>C-25:T>C | TGCAGCAGATTTTTTCCC GGATAAATTCTAGTTACCCTACATTAC                            |
| 39714081 F 0-26:C>A-26:C>A | TGCAGAATTCTGATGGGATTCAGTGTCTTAGTGATGGTATGATCACACCCGTTTCAACAATCTATCT       |
| 39721119 F 0-32:A>G-32:A>G | TGCAGAAAACAACACTAGTCCATGCAAAAAGATACAAGAAGGGTCGACATACCTTTGTTATCGTCTCTTTG   |
| 39724695 F 0-17:C>T-17:C>T | TGCAGACAGACTTGTATCGTAACTTGGCTTGAATGTGTTCTTCTCAAGCTATACTCTTAC              |
| 46768976 F 0-9:G>A-9:G>A   | TGCAGCATCGACTCTCTCATTATCATCATCAGATTCACTTGC ACTTGCATCTGTAGCCAAATAGAGAAG    |
| 39724664 F 0-38:G>A-38:G>A | TGCAGAATATTTTTATTATTCTCATTATGAGAACAACAGGTTTAC                             |
| 39714194 F 0-7:T>C-7:T>C   | TGCAGACTATTTTCTCCCATGCAAAGTTATGTATTATTATACATGAATAAACTGTAGGAGTTTCTTGTA     |
| 39723190 F 0-33:A>G-33:A>G | TGCAGGACTTGGAGGTTTGGGCAGTGGACCAGAACTTTGTGTATGGTCA TTACTTTCCCTTAGGTAAG     |
| 39728908 F 0-42:A>C-42:A>C | TGCAGAGATTGAGAAGTCTACCCAAATTGATAGGGACTTCACATAATTTTAC                      |
| 39724021 F 0-23:T>C-23:T>C | TGCAGTCTTTCTTTGTCAACACATGAAGCTAAACGGAGGGCTTTACACCA TGCTTCTTCTCCAGGAA      |
| 39725622 F 0-64:A>T-64:A>T | TGCAGAATCCGAGAGCTTTCTTCCCTAGCTTTGCTGATTCATGTTGAAGATGGCAGCCATTGAAGTCC      |
| 46762338 F 0-45:T>C-45:T>C | TGCAGAAAATATATGACATTCATATGGCAAACCTTTGTTCTTGTFTTAGAAGTTGTTACCCACCTGGTTC    |
| 39726094 F 0-9:T>A-9:T>A   | TGCAGCATTTCTCAGCTCAAGTCCTTGCATCAGCTACACCCCATAGAATCTCTAGCATTTC AAATTAC     |
| 39721554 F 0-38:G>A-38:G>A | TGCAGACAACGACACTGAAGATGGTAGAGTATTTTCTGTGAGAGTTCC CAATGTAGGCTTGAAATTTC     |
| 39721315 F 0-16:A>C-16:A>C | TGCAGAACTTTAACACAATCTGTGAAGCTGACGACTCTTCTCAACCTGT TATGTACGTACCTAGTGCA     |
| 39728071 F 0-18:C>T-18:C>T | TGCAGGTAGAGATGCAAACATCATAACGGATCATTCTGGGAATTAC                            |
| 39729518 F 0-13:C>A-13:C>A | TGCAGATCAGAACTCGAACAACATTAC                                               |
| 39717950 F 0-21:C>T-21:C>T | TGCAGTATGATGTACAGTGACCGGAGGCAGTATATGATGGCCAATAACGGCCAATGCTTTGTCCGTTTA     |

|                            |                                                                                                                      |
|----------------------------|----------------------------------------------------------------------------------------------------------------------|
| 39726531 F 0-38:C>G-38:C>G | TGCAGGTCTGCTCTTTTCACCGTTATATTTAGGTGTTTCCATTTAGAGGCTACTACTCCAGGTGTTTGA                                                |
| 39726206 F 0-22:C>T-22:C>T | TGCAGCGGAGAGGTTGAGATTGCCGTACTTGAGTGCTTATCTGAACTCGCTCGGTGCTAATTTCCGGCA                                                |
| 39723484 F 0-21:T>A-21:T>A | TGCAGGGGAATCTCCACTACTGCTTCCCCTAATATCCTCCCTTTACCACATCATGGGGGTTTACAGGA                                                 |
| 39714074 F 0-38:A>G-38:A>G | TGCAGAATTCATGACCGCGGGAGCTGGATTGAAGAACAATGGGTCATTGACATTTATTGGGTTGGGTGT                                                |
| 39717235 F 0-29:G>T-29:G>T | TGCAGGCTTTGGCGGCCGAGTTCAATATCGCTGAGACGTGTTATTTGATTGCGATGAACGACGAAGACG                                                |
| 39726728 F 0-6:G>A-6:G>A   | TGCAGTGCATAGTTTTCAAGTTGTTTCATACAGGCCCGGAGCCAATGCTAGAGAAAATAATCTGTGAACA                                               |
| 39722311 F 0-23:C>T-23:C>T | TGCAGCAATCTTGCATTTGAAGACATCGAGATAAGATCTGCAAATTCTGATAGAATCACTCTAGCCTCA                                                |
| 39718161 F 0-18:G>T-18:G>T | TGCAGTCTCACCTCTTCCGGCGGATAATACTAACAAGCAAGCAAAGAAGGACAATACAAACCATCCACG                                                |
| 39721040 F 0-20:A>G-20:A>G | TGCAGAAGGCTTCCTTCTGGATGTGTTGTTCAAGATATGCCCAATGGGATATCCAAGGTAAAAACATAA                                                |
| 46756765 F 0-40:A>G-40:A>G | TGCAGGTGAAACACAACCTCATGCCTCTCCGAAACGCCTCCAAAGGAGACAACAGGATTCTTCTTAGGGA                                               |
| 39725092 F 0-17:G>A-17:G>A | TGCAGGATTCGAGATTGGGGGATACAGGATGAGGATGAGTCGAAGTTACTGCAGAAGGCCAGAATGTCACCGAGAGCATGGTCTCATTCTCGGCTCCTTCGACTCCCGTCTCTCCG |
| 39713799 F 0-43:C>T-43:C>T | TGCAGTTTCCGAAGCTAATCTCAAGCGAGCTTCCAAGAAAGAGAATCGCGATTGGTTTTTTCATGGAG                                                 |
| 39724415 F 0-17:A>T-17:A>T | TGCAGTTCAGATCATTTTTGGAGCCATTTTTGTGGAAAAAGTATAGTTCA TCAAAGGTGTCAGAATATA                                               |
| 39718633 F 0-65:T>G-65:T>G | TGCAGAAGATCTATCCACAATCGAAGGAATTGCGACAGTGTGCTTCTA CATTCTTCATTCCCCTCA                                                  |
| 39721365 F 0-12:A>G-12:A>G | TGCAGTACCGATTGCTTTACAAAAGGTATGTTGCTTGTGCTAATTAGTAGACTCTGTTATACTTCTCCG                                                |
| 39723786 F 0-44:T>C-44:T>C | TGCAGTCATCCATTGCAAGTCACCAGCTCCAATTGTTCCCTTTATGTCCTTTGAAATCTTCATGTGTCAT                                               |
| 39723925 F 0-31:A>G-31:A>G | TGCAGGATGTAATTCTCTTATTTCACTTCTTTTCTATTCCTGATAAGCAATAATATTAGCAGCAGCTC                                                 |
| 39723266 F 0-24:A>G-24:A>G | TGCAGAACATGCACCAGAAACGTTGTGTAGGATGGATTCTCTTGTTCATTGGGAAATACTGCAAACCTT                                                |
| 39716167 F 0-68:A>T-68:A>T | TGCAGCGGCAGCAGCAGTAGGAACAACACCTGTGGATATTCCCGGTTTTGACAAATGCAGCAGCTGTA                                                 |
| 39721657 F 0-20:A>G-20:A>G | TGCAGACTCAGTTGCTTGGCACCGGCTAGAGCTGCAATTCCTGAATCTGTGATCGAGCATTTTGAGACA                                                |
| 39714974 F 0-63:A>G-63:A>G | TGCAGATGATGGGAAGAGATGGGATGCAGAACCGGACCATCTGAGAGAGGAAGTAAAAGAGTTAGGTAG                                                |
| 39721910 F 0-44:A>T-44:A>T | TGCAGAGTCTAGACAGCTACACGTGTACAGGTTTTTACTGGAGAAAAAAGATGAGATAAAAAGCCTGTT                                                |
| 39721215 F 0-14:A>G-14:A>G | TGCAGAAAGTAAGCAACCTCGAGGATCGGTGGCTTCAAAGGAGATGCATAGGCAGCTTCTCCATGTAAG                                                |
| 39727848 F 0-51:T>C-51:T>C | TGCAGTGATTGGCATTGATCATGAGGTCACAACTATTTCAATACTAATTTTCACATTACTTCATATT                                                  |
| 46776598 F 0-8:T>A-8:T>A   | TGCAGATCTAGGAGAAAAAAAATTCTTCTAGTGGAGATAATTTGGAATCTACAACGCCAGGTGCTTTT                                                 |
| 46760832 F 0-37:A>C-37:A>C | TGCAGCAAATCTTAAAGAAACCTAACATTCTTGTTGAGTATATCTTACTGCAGAGACGGTGGTGAACATTTGCTTGGATTGAGTGTGGCAGCGAGTTCTATGGATAGAAGTTT    |
| 39721733 F 0-45:A>T-45:A>T | TGCAGAAGAATGAGAAGGCTCGGACTGCATTGTATTACTTGCTTCTTTTTTCATTCTACTACCTATG                                                  |
| 39713776 F 0-21:G>A-21:G>A |                                                                                                                      |

|                            |                                                                            |
|----------------------------|----------------------------------------------------------------------------|
| 39720223 F 0-43:G>C-43:G>C | TGCAGCTTCCCCAGGCGCTGTGCAACCTACTAAGAAATCCTACGGAGATCTTAC                     |
| 39720865 F 0-21:G>A-21:G>A | TGCAGTTGGGTGTGAAACACAGGTTAC                                                |
| 39723697 F 0-66:T>A-66:T>A | TGCAGGTTTTCGCCATTTCATCCCTCTCTCTCACCTTCTCTTTCTTCTGTT<br>CATCGTTTCGGCTATAT   |
| 46762726 F 0-21:G>T-21:G>T | TGCAGACATTGTGGCAAAAAAGAGAGCTTCAACTAACACATAATTTAC<br>TTTCCTAGTAATGTCAGCCA   |
| 39722001 F 0-19:T>C-19:T>C | TGCAGATCATAAAGCTCAGTAGTCATAAAGTTTGGTGCTGTTCTTTCAAT<br>TTCTTTTGGTGTGGCCTTA  |
| 46776599 F 0-27:G>T-27:G>T | TGCAGATCTAGGAGAAAAATAATTCTGCTAGTGGAGATAATTTGAAAT<br>CTACAACGCCAGGTGCTTTT   |
| 39725462 F 0-7:C>T-7:C>T   | TGCAGAACAGAGAGGCCGTGTCGACGACGATGTTCCCGACGACGACTAT<br>GGAGCCATCGATGAAGTAAT  |
| 39725751 F 0-24:G>A-24:G>A | TGCAGAGCCGAAGCTTCGAGCCGGGTTGATACCGGCGCCGGTGACCGGA<br>ATGGTGGCCAAATTCACCAC  |
| 39722695 F 0-31:G>A-31:G>A | TGCAGCCGGCGGGAAGGCCGGAGATGACGTGGATCTCCCTTAGGGTTCC<br>GACGTTGCCGTCGCCGACGA  |
| 39724388 F 0-64:T>G-64:T>G | TGCAGTTTAACTTATTCATACAAATGGATAAACCCAGAAACATGAAGTA<br>TTGTGCTATGTTGTTTTTT   |
| 39725516 F 0-23:T>A-23:T>A | TGCAGAAACATTACAAAAATGAGTATGTGAACTTTTCGCAACTTCATCTC<br>CGTCCTCTAAGAAAACCAT  |
| 46753609 F 0-8:A>T-8:A>T   | TGCAGAAAATTTTCGGAGAAGATGACTCAGAAGGCGAACCTATTCAAAG<br>GGCAACAGAAGAGGAAAACC  |
| 39718292 F 0-36:C>T-36:C>T | TGCAGTGAGTGATTCCAAGCTCTCATTTTTCCGGATCGCTTCTCTATGC<br>GAGTGGCCAAAACATCATC   |
| 46764483 F 0-8:C>T-8:C>T   | TGCAGGCGCGGCAAGAGGCTGTGGTTGGCAGCACTTGGCTACTTACATA<br>AGCCTCCCGACGTTCTATAT  |
| 39718593 F 0-14:A>G-14:A>G | TGCAGTTATTGGAGACATTGTATTACAAGTCTTGTTTACTTGAAGTTTTTA<br>GCTATCACTTTCAATGAA  |
| 39722812 F 0-26:G>A-26:G>A | TGCAGCGGCGGAGAGAGGAGGACCGGCGGCGAGATTCAGTTGAGGAG<br>CGGTGTTTTACAGCGAGATTG   |
| 39715211 F 0-65:C>A-65:C>A | TGCAGATTTTGGCGGGTTTTAGAGTAGGAAGCGATGAAGGAAAGTATCG<br>AGCCGAGTGCAGGGACAGT   |
| 39726728 F 0-8:G>A-8:G>A   | TGCAGTGCAGTATTTTCAAGTTGTTTCATACAGGCCCGGAGCCAATGCTAG<br>AGAAAATAATCTGTGAACA |
| 39717946 F 0-22:G>A-22:G>A | TGCAGTATCTTAGAGACTACCAGACTTTTGCTGGCACAGCTCCAAGACGT<br>CATCAGAAAAGGTTAGAGT  |
| 39728670 F 0-28:G>C-28:G>C | TGCAGGAGTCCCTCCAGTCAAGTGGCTGAATAAGAAGATTGATTAC                             |
| 39725897 F 0-35:G>A-35:G>A | TGCAGATGTGCGGCAATGGAAGTGAGATAAAGAAAGAGAAGATAGATT<br>TTCATTTTTCTTAC         |
| 39715635 F 0-23:T>C-23:T>C | TGCAGCAGTGGGGAGATCATGAATTACATGAGTGTTGATATCCAAGAA<br>TCACAGACTTCACTTGTTTC   |
| 39728901 F 0-8:C>G-8:C>G   | TGCAGTTTTCGATTTGTTGCTAGCAAATCCCTTTCTTCAACAATTTACTGAC<br>CCATATTTATGATTTTTG |
| 39724357 F 0-25:T>A-25:T>A | TGCAGTTGGCTGCACAAGGGGTCATTGGTAAAAGGGTTGATGAGATGGA<br>GTCAGGCTTTATGATGGCCT  |
| 39722593 F 0-15:G>A-15:G>A | TGCAGTCAAGGTTTGGTTCTAGCTAGCAATGTTTATGATCTAGGGCAACAA<br>TGGCATGCTCCATGGTGGC |
| 39725739 F 0-68:A>C-68:A>C | TGCAGAGATTTCTTTCTTGTATGCTAGGTTGTATCAGAATCAGAATTCCC<br>CCAGGGATCCTATCTTGTA  |
| 39714590 F 0-63:G>T-63:G>T | TGCAGAGGGACAATGATCTTGAGTTGAGGGAGTAATCAGTTGTACAAAA<br>AGCAAATGGTGAGGGCTGTA  |
| 39722399 F 0-39:C>G-39:C>G | TGCAGCAGACATAAGCCCCATCAGAAGAAAAAATGAATCATGCTTCGA<br>TGCATTTTTACGGTCTTTGA   |
| 39715249 F 0-44:T>C-44:T>C | TGCAGCAAATTCAGAGTGATGCGTTGAGGGAAGCTATTTTCATCTATCTT<br>CAGTGATAGCAGCGAAAAG  |

|                            |                                                                            |
|----------------------------|----------------------------------------------------------------------------|
| 46767014 F 0-32:A>G-32:A>G | TGCAGATAGTGTAATATCAGTACAAAAAATCATCGTTAC                                    |
| 39724835 F 0-12:C>T-12:C>T | TGCAGATTAAGGCGTGTTTCTCGGCAAATGGGTTTTTAC                                    |
| 39726930 F 0-25:C>T-25:C>T | TGCAGAAAACCTGCATCAAATTATCTTAC                                              |
| 46755473 F 0-18:G>A-18:G>A | TGCAGCCATGAAAGCTCTGGGTCTTGCTCACTTGAAAAGAATTTAGTCAA<br>GCCTTGATGGAGCCTAGCT  |
| 39716067 F 0-37:T>A-37:T>A | TGCAGCCTGTTTCTTTTCTAACTTGTAATTTTGGATCCCTTGCTGTCAT<br>TGTTTACTAAATTCATGT    |
| 39723114 F 0-57:C>A-57:C>A | TGCAGGAAAACCTCGAGGAAGATTGTTGATGAGAAAGTTTCTTGTTGAGG<br>GCTGAATGCTGGGGCTTTGT |
| 46756987 F 0-40:C>T-40:C>T | TGCAGTACGATGCATCCCAAATCAATCTCATCTGCCCTGCTGTAGTCCC<br>TATGATATCTATTACGAGA   |
| 39713493 F 0-32:A>G-32:A>G | TGCAGAAACATATGGGTACTGGATCCGTTGGGAGAGTTGGATAAAAAGA<br>AACATAGGAATTCAGTGTAG  |
| 39716831 F 0-56:A>T-56:A>T | TGCAGGACAAAACGGACAAACCTTCCATGAAATTAGCATAAAAATAGAC<br>AAGGGAAAGGGAGTCTCAA   |
| 39727089 F 0-5:T>C-5:T>C   | TGCAGTCGTTGTAAGAAACCTAAGAGAACAGTTAGCATTTTTTCTTCAGC<br>TATTATTTTAC          |
| 46763290 F 0-21:G>T-21:G>T | TGCAGATTCTTGCTCAGTTTCGCTTCAACACGCCGATGTCGGAAAATTG<br>CGGCTCCGGTGACCGGCCG   |
| 39727123 F 0-10:G>C-10:G>C | TGCAGCTGCTGAAGGAGGCATATTATTCATATGCTTTTCAACTTGTTTCT<br>TTTAC                |
| 39725342 F 0-18:A>G-18:A>G | TGCAGTGTCCGGTAGCATCAATTGTTAC                                               |
| 39715555 F 0-67:T>G-67:T>G | TGCAGCAGCCGCTAAGGTAGCCATGGATTTCAGATTTTCTTCCCTACAGAG<br>AGACTGAGAGAGAGATC   |
| 46757642 F 0-59:T>G-59:T>G | TGCAGTTGCTGCTGCTGTCCAAATCCTAATTTCAAAGAAGGTAAAGTTAG<br>AGCAAATATGATAGAAAT   |
| 39716443 F 0-16:T>A-16:T>A | TGCAGCTGCTCTGCCTTCAGGTCATGTTTCTGTTGCTGGTTCTACACAGGT<br>TCAAGCACAACCTACCAAG |
| 39725622 F 0-65:G>A-65:G>A | TGCAGAATCCGAGAGCTTCTTCCCTAGCTTTGCTGATTCCATGTTGAAG<br>ATGGCAGCCATTGAAGTCC   |
| 39714677 F 0-36:A>T-36:A>T | TGCAGAGTGCATGTAAGATATAGCTCCTGCAACTTCAGAAGCGATTTG<br>AGACGAGTTTCCCATGGAAG   |
| 39717107 F 0-8:A>G-8:A>G   | TGCAGGCCAAAACCTATAATTTTTACCAGCGCATAACACATACATAAG<br>TGTCTTTTCAAGATAACTAT   |
| 39715175 F 0-7:T>A-7:T>A   | TGCAGATTTCAAAACCTCAAACGATTGAAAAGAATCACCTTGGTGTGA<br>TACCATTTGTAATAATCAGG   |
| 39725720 F 0-38:C>T-38:C>T | TGCAGAGAGAGCAAGTGATCGATCAACGTGTTTCTTCCCTCTTCCCTGTT<br>GCTCCGATGTTTCGTCGATC |
| 39717099 F 0-30:C>T-30:C>T | TGCAGGCATGTACATGGAATCACCACCAACGGTGCTCCACAATCAGCT<br>AGTTGTGCTCGAATCTGCAT   |
| 39726043 F 0-32:A>T-32:A>T | TGCAGCAGATCAAGAACTGCGCTCGACGACTACACCAAAGATGGAAGC<br>GTGGATCTCAAAGGCAACCC   |
| 39721134 F 0-65:T>G-65:T>G | TGCAGAAAGCTAGGAAGCAGAGGAGCATTGAAGACGGCCATGAAAAGG<br>TAAAGGTGCAGCTAATTTTC   |
| 39722189 F 0-37:G>A-37:G>A | TGCAGATTGTACCCAGCTGCAATCTGGAAAGAACGTGATGATAGCAGC<br>ACATGGAAATTCATTGAGGT   |
| 46763722 F 0-8:G>T-8:G>T   | TGCAGCCAGAATTGATATTCTGGATATGGAGATAGAGGAAGGGAAGGA<br>GCTTGCACCGAGACGAGCCAG  |
| 39723598 F 0-45:C>T-45:C>T | TGCAGGTCCTGCTCCAATGATAACAACATCATATTCTATAGACTCCCGTT<br>CCGCCTCACTACTGAATCT  |
| 39721846 F 0-39:A>G-39:A>G | TGCAGAGGAGAATGCAAAGCAAGAAAAAGGAGCTGAGCAACCATCCGG<br>CTCACAGGATGCAACTATGTC  |
| 39725462 F 0-15:C>T-15:C>T | TGCAGAACAGAGAGGCCGTGTCGACGACGATGTTCCCGACGACGACTAT<br>GGAGCCATCGATGAAGTAAT  |



|                            |                                                                             |
|----------------------------|-----------------------------------------------------------------------------|
| 39728541 F 0-11:T>C-11:T>C | TGCAGATCATCTCCAAAACAGAAAGCACAAAGTAAGCATAACCTCCTTCAA<br>CCATCTAAATCCAAGTCGAG |
| 39717744 F 0-29:G>A-29:G>A | TGCAGTAACCATCGGCGTCTATAATTTCCGACATGTCGAACAACGTCGGT<br>GCTCGACACCGGTAATCCG   |
| 39721740 F 0-33:C>T-33:C>T | TGCAGAGAGAATGTTTCAAGATTTAGTTTCGTTGCCTTATTCATGCAAGCAA<br>AAAAGAAAGAATCATCATT |
| 39722511 F 0-10:A>T-10:A>T | TGCAGCATCAAAAATGCAAGTTTATGTCAAAAAAACACAGACCATATT<br>GCATCAAGAAATAGAAAAAG    |
| 46764552 F 0-14:G>C-14:G>C | TGCAGGGCAATGGTGAGGGGAAGAGGCTGAAGGTGGCAGCTTGTTGCA<br>AGCATTACACAGCCTATGATC   |
| 39724575 F 0-27:A>C-27:A>C | TGCAGAAAACCTACCATATCAATGACAACCTTCACTTCTTTAC                                 |
| 39719966 F 0-38:T>A-38:T>A | TGCAGCAGGGGTTCGGATATTCACACCAAACATCAATCTTCTGACATATTC<br>TTAC                 |
| 39722798 F 0-52:T>C-52:T>C | TGCAGCGCTGTTGATTGATTGGGTCTGAATCACTATAAGCTCGAATACCC<br>ACTGCCAAGGATCGTTCT    |
| 39726935 F 0-13:A>G-13:A>G | TGCAGATAATTGAAAATAAACTTTTACACGTGTTGCAATATTTAC                               |
| 46753848 F 0-21:A>G-21:A>G | TGCAGAAGAAACGCTAAAATCACTTATTGCAAATGGTGAAGCTTGCAGG<br>TAAGCTTTGAAAAACGATG    |
| 39722375 F 0-53:G>T-53:G>T | TGCAGCATTCAACAAGAACTGAGAGTACCATCGACAGCAAAGAGTTGCTT<br>ACAAGTATCAGTGCCTGAAA  |
| 39714216 F 0-31:C>G-31:C>G | TGCAGACCTCTCATTACATGTATGAAGTTGCAAAATTCCTTTTGGAGAG<br>CACATATTTGAAACATGGA    |
| 46768934 F 0-35:T>C-35:T>C | TGCAGCAGCCAATGAAATGGCCACTTTTCTGTTTCTCTAGAACGGAAAAT<br>TCTGTCACAAGTGGAAGGT   |
| 39721343 F 0-39:T>C-39:T>C | TGCAGAAGACAGTGACCATGCCGAGAGTTTACAACATAATGTTTCGTAGA<br>CTTGGTCAAGCAAATTACCA  |
| 39719698 F 0-23:T>C-23:T>C | TGCAGATATAGAAATAATCAAAATATCTCTTCAAAGTACAAAGTTAC                             |
| 39722020 F 0-68:G>C-68:G>C | TGCAGATCCTAAATGACTAGCCAATTTCAAATAGTTTGGAAACCAGAA<br>CATAACAAATGGATAAGGG     |
| 39724377 F 0-64:T>A-64:T>A | TGCAGTTGTGCTCACTTCTTGCATACCCTGATATCAAAGTAGTCCATGCC<br>ACCACATCCCGCGCTGGAA   |
| 39727834 F 0-36:G>C-36:G>C | TGCAGTCTGTGGCTGGCGTTGGCAGCCAAACCAGCAGAGCACCGAGAGA<br>TTCTGTGGAAGCAAATTGAA   |
| 39718939 F 0-57:G>A-57:G>A | TGCAGTTTTACATTCAAAAACCTTTAGCAAAAGAAAAGCTTCCCTGACCAC<br>AAACTAAGAAGAAAAAAG   |
| 39726300 F 0-52:C>T-52:C>T | TGCAGCTGCTTTTGGCATGGCCAAGGCTATACAAAGATGAACTAAACCC<br>CCCCATGTCAATCTCTAATC   |
| 39718404 F 0-30:A>G-30:A>G | TGCAGTGGATGTGCAGTAGCATCAAGATTTACAACAACCTGACATTGCAA<br>AGGAAGACAATGTTACAAG   |
| 39715456 F 0-48:C>T-48:C>T | TGCAGCACTAATTCTCCCAATTTGATGCAGAGAATTGGCAAGGGCCGAC<br>TTACCAACATTTGGAATTCC   |
| 39714752 F 0-27:G>T-27:G>T | TGCAGATAATCATGGAAGAGTTCAAGTGATTTTCATCTCGCAACCATCCG<br>AAACCGGAGTGAATTTGAA   |
| 39720421 F 0-23:T>C-23:T>C | TGCAGGCTGCAATTTTATAATTATTGGAGTTGCTGTTTAC                                    |
| 39722176 F 0-63:A>G-63:A>G | TGCAGATTGAACGCATATCATCTCGATATCAGCCGTCCCTTGTTTATAT<br>AGTCTTGGGAACAACCTTT    |
| 39725039 F 0-57:C>A-57:C>A | TGCAGCTTGTTTTTCTTGGACTTGTGTGCTTCACTCTCCCATATCCTCC<br>TTCTCTCGAGATCGGAAG     |
| 39727511 F 0-13:A>T-13:A>T | TGCAGCAGAATGCAGATCGGAGAGAAAAGGCAAAACCAAATAACTTC<br>TCACAAGCATGTTCTACCAT     |
| 39723401 F 0-50:G>A-50:G>A | TGCAGGCTGAGGACAATCACCAGGACAATGAGCAGCAAAATGATGATG<br>CCGATAATCGTCCATTTCCGG   |
| 39725365 F 0-24:A>T-24:A>T | TGCAGTTCATCAACTGTATATATAAACTGAATAATTCAAGCATCATTAC                           |

|                            |                                                                                                                        |
|----------------------------|------------------------------------------------------------------------------------------------------------------------|
| 39715610 F 0-12:T>C-12:T>C | TGCAGCAGGTGGTTGGGAACCTAGGATGACTGATTGATAGAAGATACCTTTATTGCCTATTGGTTCATC                                                  |
| 39725703 F 0-31:G>T-31:G>T | TGCAGAGAAGATGGTTATTTCCACAATTTTTGCATCTTGCTTTACTTTTCTTGAATACTAAAATGTAAG                                                  |
| 46768554 F 0-27:C>T-27:C>T | TGCAGAGCAGCTAAGATCATCAATCTTCGACGAGATCACTAAACTGTCCCTGAATCGTCGCTTTGTGG                                                   |
| 46772371 F 0-60:A>G-60:A>G | TGCAGTGAGCTCATTTCAGCTCAGTGTTGGTGCAGCCGGAACCTCGAATAAACTGTCAGACTTCCAAA                                                   |
| 39713930 F 0-55:G>T-55:G>T | TGCAGAAGTCAGTGACCTCATGAGTGTCTGGACTCTCAACCAAGAAACTGTCTACGACATTCTCCTTGG                                                  |
| 46756177 F 0-16:T>C-16:T>C | TGCAGGAATGTTTTGTTTGCATTCATGTGCGTTCATACATCTCTTTTGTGAAATACTGAAGTTGTTT                                                    |
| 39721708 F 0-24:C>T-24:C>T | TGCAGAGAAGATCTCCTATAATTGCTTGATTCTGTTATGGATGTATTAGTTGTGGAGTTGGCCATGATG                                                  |
| 39725943 F 0-56:A>G-56:A>G | TGCAGATTTTATTTTCGATTTCTCTGCAACATATGTTGGGGTTGGAATGATTTGTCCATACATCATCAAC                                                 |
| 39721987 F 0-13:T>A-13:T>A | TGCAGATATTTGCTTCTGATAGCTTTCTTGAGTTGACAGAATATACACGTGAAGAAATTTTGGGCCGAA                                                  |
| 39722440 F 0-49:C>T-49:C>T | TGCAGCAGCCATTGAGACAGCAAAAGCTGACATTTGAAGAAAATGGTAACTCGAAATGGGGGAATCCCAA                                                 |
| 39725365 F 0-20:T>G-20:T>G | TGCAGTTCATCAACTGTATATATAAACTGAATAATTCAAGCATCATTACTGCAGTTCACAAACAAGCATATGATATACAGAATCCTTTGTTATAATTCAATCATCTTGTAATTCAAAT |
| 39725687 F 0-36:G>A-36:G>A | TGCAGACTTTAACCCCATGATGTAGAGCTGAATGCTGGGATGCTGGTACTGGGAGTCCATCGCAACA                                                    |
| 39723697 F 0-41:C>A-41:C>A | TGCAGTTTTGCGCCATTTCATCCCTCTCTCTCACCTTCTCTTTTCTCTGTTTCTCATCGTTTCGGCTATAT                                                |
| 39728787 F 0-30:T>C-30:T>C | TGCAGTTCCTCATGACTTACGAGGGGCTGCTCTCCATTCTGGCTAGTGGAATTTCTTCTCTATTACA                                                    |
| 39718827 F 0-14:C>T-14:C>T | TGCAGTTGTTGGTGC GGATGATCTTGACTTGGGGGAACAAATTCACACACTTGTTATGAAATCAGGTTT                                                 |
| 39721273 F 0-19:C>G-19:C>G | TGCAGAACCAAATCCTCGACTCGGCTGAGTCGTCCGAGTTCTGGAGGTTCAAACCGCTAAGACCACAC                                                   |
| 39727212 F 0-22:C>A-22:C>A | TGCAGTATCCGATGCAGGAGAACTGGAGTTC AATTCTTGAGGGGACAAA AACC AATTAC                                                         |
| 39715603 F 0-5:C>T-5:C>T   | TGCAGCAGGCTCTGGAAC TGC GGATGAGCCAGCCAGATATCGGGACGATGTATCGGCTTCGGTTTTTCG                                                |
| 46754303 F 0-7:A>G-7:A>G   | TGCAGAGACACAATCTCTCACCTTGGTATCAAAGAATGCAGCTTCACCATTTGTGGATTAGCAATCAG                                                   |
| 39719766 F 0-5:A>T-5:A>T   | TGCAGATGCCAGTCGTAGGGAATGTATTCTCTGTCCATTTTTTTTAC                                                                        |
| 46768450 F 0-13:C>T-13:C>T | TGCAGACCGGACCCACGTGAACCGGCCGCCCATCCCAAAGTCAACCTTCTCTAACCCAGCCTTGACC                                                    |
| 39718212 F 0-35:C>A-35:C>A | TGCAGTCTTCTGCCTTTTTGTCTTTGTTTGGGACCCAATTCGTGTCTCAATCATATACTATTTTGTCTT                                                  |
| 39721466 F 0-62:C>T-62:C>T | TGCAGAATATCTGGTAATTCAATAGACAGCTTTCACATTGTATCACTATAATTTTCTATCTTCGACATT                                                  |
| 39725248 F 0-23:A>G-23:A>G | TGCAGTAGTATGCACTAAACATTATATGCGACTTTTCTTTAC                                                                             |
| 46758077 F 0-16:G>A-16:G>A | TGCAGAAATTAAGCGCGAAGATGCTCTGTTTCGGCGATATTTTAGGGATTTGATTGCTGTTGCCGTTGG                                                  |
| 39723708 F 0-59:C>T-59:C>T | TGCAGTTTTTTTTTGGATTGTCCAGTGA AAAACA AATAGAGGTTACCTTTTGGTATGGCTCTGGTTGCTT                                               |
| 46774011 F 0-45:C>A-45:C>A | TGCAGTTAAGCTATGCTCCAAGCCCTTGCTTTATGGAAAAAATCCA ACTTCTACTGGGCAATCACA                                                    |
| 39720312 F 0-11:G>A-11:G>A | TGCAGGACTTCGTATGCTTGATTAC                                                                                              |

|                            |                                                                            |
|----------------------------|----------------------------------------------------------------------------|
| 39724850 F 0-32:A>G-32:A>G | TGCAGATTGTTTCAACATAGTTGCAGTTTCAAAAAGTGCTGAACTTAC                           |
| 39728414 F 0-22:T>C-22:T>C | TGCAGTTTCCCCATCTGATCTTTGGTTTTAGTTTCACTATTTGAATCGAAT<br>ATATCCTCTATTTCCTGTT |
| 46765580 F 0-53:C>T-53:C>T | TGCAGCAGTTTGCAGACTCTTCTCATTGAGGGGCGGTTTCATGGGGAGTG<br>AGCTCGTGCAGAGAAGTCCC |
| 39714241 F 0-6:C>T-6:C>T   | TGCAGACGCAATAGCTCCGATGAGGGTGGTCTGGAGGGCACTTTTGAAG<br>GGCTTATTACCTGTGAAGTA  |
| 39723055 F 0-32:G>A-32:G>A | TGCAGCTTGGTCTTCTAGCTTCCAAGGATGGGACAGATTGTGAGGGTA<br>ACTGATAGCTCTGGGGGAGCC  |
| 39725505 F 0-48:G>C-48:G>C | TGCAGAAAATAAGCAACATATGGATATGGATTACTCCAAAGAACGTGAG<br>GGGTTTCATGAGTAATGACT  |
| 46771683 F 0-13:G>C-13:G>C | TGCAGAAGTTGTGGATCATAAATGCAGTGACATTGTGTATCAGTATTATT<br>TTCTGATGCATCAAATGAA  |
| 39727979 F 0-24:T>C-24:T>C | TGCAGAAGGGATGGCCAGTTTGTAGTGTCTGAGAAAAGTAGTTTAC                             |
| 39715313 F 0-57:T>C-57:T>C | TGCAGCAACTGCTCAGCCCAATACAGGAAACTGGGTCTACTGGCCTTCC<br>CCTGCCGGTGCCGGGGCCTC  |
| 39726534 F 0-40:G>T-40:G>T | TGCAGGTGAGGCTACAGCATGTTTTATAGGGAGTCATTTGGTATGCAATA<br>TCTAATATCGTTGACTTCA  |
| 46768934 F 0-5:C>T-5:C>T   | TGCAGCAGCCAATGAAATGGCCACTTTTCTGTTTCTCTAGAACGGAAAAT<br>TCTGTCAAGTGAAGGT     |
| 39728933 F 0-22:T>G-22:T>G | TGCAGCAAATGTAAGTTCTTATTGCCTCTTATACTCAAATCAGATACC<br>CATTTGATCGATTAC        |
| 39714010 F 0-17:C>T-17:C>T | TGCAGAATCGCCACGAACGAAGGTTATTGTCCTCGCTCGTTCTTGGGCAC<br>TAGCTGCAATCCATGGTGG  |
| 39718724 F 0-36:A>T-36:A>T | TGCAGTTGAGACCTACGCAAAAAGGCATTTCTTCCATAACGCAAAGAAAG<br>GAGAATAGCAAGAAGTGTAG |
| 39721311 F 0-35:A>T-35:A>T | TGCAGAACTTGATGAGAGTAATGCCACAGCATCTGAGCGTACTGAAATT<br>TCAGCAGAAAATGATATGCA  |
| 39722442 F 0-42:A>T-42:A>T | TGCAGCAGCCCAGATACCTATCCAAAGATACCAGAGTCTTCAAATTCATT<br>CTGCTGCAAAAAAGTTAGA  |
| 46764813 F 0-49:C>T-49:C>T | TGCAGTAAAATTTCTGGCGAATACAGAGTAGAGCTACGGTACTGGAGTA<br>CGTTGTTTCTGGAAGGCTCG  |
| 39726039 F 0-18:T>C-18:T>C | TGCAGCAGAGCAGGCTCCTCCAGGAGTGGAACAACGGGAGTGAGAGT<br>AGAGAGATGAGAGCAGAGAAA   |
| 39721466 F 0-36:A>G-36:A>G | TGCAGAATATCTGGTAATTCATAGACAGCTTTCACATTGTATCACTATA<br>ATTTTCTATCTTTGACATT   |
| 39717172 F 0-54:C>T-54:C>T | TGCAGGCGTATTTCTCCC GCCGGCCAATGGGGTCTACCGGACTGACTTT<br>CCGGCGAGGCCGCTGTCCC  |
| 39716325 F 0-41:A>G-41:A>G | TGCAGTCTATCTTGTCCAGCTTCTGGAAGCATGGCAGAATCATAAGCAA<br>CAATATTTCCATAAAAAGATT |
| 39714066 F 0-35:A>G-35:A>G | TGCAGAATTACTTCAGGAGCCATCCAATATGGAGTACCCTTCATAGATTT<br>TGCACCTGAAATTGTAGCC  |
| 46757450 F 0-37:A>G-37:A>G | TGCAGTTAAGTTGCCTGACGAGGATGGCGATGCACGTACCGCAAGAAGC<br>TTTCGAAGATGATGACAACT  |
| 39715551 F 0-67:T>C-67:T>C | TGCAGCAGCATTGTCGTAACCAATTTTCTGGAGACAATATGCAGGGACA<br>TATTATCAAACAAAGTACTA  |
| 39717168 F 0-53:A>G-53:A>G | TGCAGGCGGCGGCGGATTGCCGAGATTTGAACGGAATTAGGCGGTGAT<br>GGCGACGACGACGAGGATA    |
| 39726934 F 0-6:A>T-6:A>T   | TGCAGAAAATTGAGAATAAAACTTTTACACGTGTTGCAATATTTAC                             |
| 39725342 F 0-10:G>A-10:G>A | TGCAGTGTCCGGTAGCATCGATTGTTAC                                               |
| 39726721 F 0-35:T>A-35:T>A | TGCAGTGATTCTAATGATGTGCACTTCTCTATATTCATTTATGACATAG<br>GAATTTGGGGCCTCTTATG   |
| 46758741 F 0-25:T>G-25:T>G | TGCAGATTAATGATATGTCAGCCCCTGTACAGCCTTGAGTAAGAGAAGC<br>CAACTTCCTCGTACTGACAT  |

|                            |                                                                         |
|----------------------------|-------------------------------------------------------------------------|
| 39724594 F 0-27:T>C-27:T>C | TGCAGAAAGAGTATTAGATGATTGGCTTCACTTGTC AATGGGGCAAAGC TGATTAC              |
| 39715161 F 0-30:C>T-30:C>T | TGCAGATTTACTCCTGGCGAGTCACAATAGCAAATGCCACCAGCAATGG CTTCTTCGGCTCCCATTTGCC |
| 39726805 F 0-46:C>T-46:C>T | TGCAGTTCCTTTCTTGGTGACTATCGCCCGCTTATTCAGGATCCTTCCGGCA ATGTAGTTGACCAGGTAG |
| 39723490 F 0-46:A>G-46:A>G | TGCAGGGGATTATGTTCTTGATGATTGAAGTGCCAATCATTAGACCATGT ACTTGCTTCAACTCCTTCA  |
| 39728610 F 0-42:G>A-42:G>A | TGCAGTATTTGCTCATATAGTAATATTCCAAAAAAGGTGGTGTATAGTT TGAACGACACAAAAAAAT    |
| 39716875 F 0-28:C>G-28:C>G | TGCAGGAGAAACCATATGTATTTAGCCACATTCTATTTTTTTCTTATGAA AAAGAAAATAGAAAAGTAT  |
| 39727429 F 0-32:C>A-32:C>A | TGCAGAGACGACGGCTGAATCTAATGATCAA ACTAAAGAATCAGGTTTC ATATTCGGATGTTGATTTTT |
| 39716750 F 0-42:T>A-42:T>A | TGCAGGAACAATAGAACAAAAATTTTGCTTATTCCATGAAAAATTTGTGTT AGTTATTTCTCAACTATAG |
| 39717618 F 0-58:C>T-58:C>T | TGCAGGTTCCAAGATGCTCCTATCCTCCTCAAACATATCCTACAAATATC ATAAACCTCTAGCTCAAAC  |
| 39713964 F 0-24:A>G-24:A>G | TGCAGAATAACTTTACAATTATTTATGCCACATAAGAATAAATATATAAA CAAAAAGCAGTTTTGAATT  |
| 39724021 F 0-20:A>G-20:A>G | TGCAGTCTTTCTTTGTCAACACATGAAGCTAAACGGAGGGCTTTACACCA TGCTTCCTTCTCCAGGAA   |
| 39725065 F 0-31:C>A-31:C>A | TGCAGGAATGTTGGTTTAGTCATCTTGTACACAATTAC                                  |
| 39720550 F 0-22:C>A-22:C>A | TGCAGGTTTGAATAGTTACAATCGTTTCTCTGCTAATTAC                                |
| 39717636 F 0-39:T>A-39:T>A | TGCAGGTTCTTGAGTAAGTTGGCAAAAATAAGGACTCTTATGAGAGAT TCTGGTGTGGCAAAAGCTCC   |
| 39728411 F 0-17:T>C-17:T>C | TGCAGTTGAATTTACAATAGTCATTTTGATTTTGCTTACAGAAAAAGGAC AAAATGATACGAAGAATTT  |
| 39726721 F 0-66:A>C-66:A>C | TGCAGTGATTCTAATGATGTGCACTTCTCTATATTCAATTATGACATAG GAATTTGGGGCCTCTTATG   |
| 39715803 F 0-24:T>A-24:T>A | TGCAGCCAAAACCCTCCAACCTCTTGCAACTTCAGAGCCTATTTTCCCC AATCCAACAATCCCAATTC   |
| 39723214 F 0-55:A>G-55:A>G | TGCAGGAGGAGCAATTACACCCAGCCCTCCATCAAACGCAAGCCCCGACG ATAACAATGCCAGCTACAAC |
| 39713611 F 0-20:C>T-20:C>T | TGCAGAAATGATTTTGGAGACTACGCGGAGCTTTGCTTTGAGGAGTTTGG AGATAGAGTGAAGTATTGG  |
| 39723116 F 0-36:T>C-36:T>C | TGCAGGAAAGAAAATCAGCACATCAGAGGATAAAACTGTCCATCTCATA AGTAGTTTTCTGCAAAGAAG  |
| 39717931 F 0-29:G>C-29:G>C | TGCAGTATATTCCAAGTTTAGTCCAGATTGATCAGCAAGATATTTTAGGT GCCGAATAGTTTTTTGAGA  |
| 39713407 F 0-57:T>G-57:T>G | TGCAGAAAAATGATTTTGGTTGGCCATGTGGGTTGGTCTGAATATTGTTG GAAGAGGTGAAGTTGTTA   |
| 46756053 F 0-22:G>T-22:G>T | TGCAGCTTTAATTGCTTGAGAAGTCCTATCCTCACCTTGGCAAAAATAAG GGGATTTTTTCTGCACG    |
| 39724635 F 0-36:C>T-36:C>T | TGCAGAAGAACTTCTACTGCTTGTGATGACAATCCCGATAGGTTGGAA TTAC                   |
| 39721884 F 0-15:G>T-15:G>T | TGCAGAGGTACTAATGCAAACATCGGCCAATCTTGGATTGTTCAACTCAT TCCATTTGCCTGAATATC   |
| 46755222 F 0-32:G>C-32:G>C | TGCAGCAGCGGACGCGTAGTTGACTCCATGGAGAGACTGTGCTCCGGAA ACTTGAGAGAAGGCAGGGAC  |
| 39722676 F 0-20:G>C-20:G>C | TGCAGCCGAGGAGGCTGCATGGTGGAGGTTTTTCGTCGAGCTGATCAGT TGAAGTGCCTTGGCGACTTC  |
| 39719280 F 0-28:T>A-28:T>A | TGCAGAAAATGAATAATCTCTCTTTCCCTAAACCCATAAAAATAATCGACA CAAGAGATTAC         |
| 39722150 F 0-13:G>A-13:G>A | TGCAGATTCAAATGCTCAAGAAATCAAAGAAGCCTACAGAAAGTTGCAG AAGAAGTACCATCCGGACAT  |

|                            |                                                                             |
|----------------------------|-----------------------------------------------------------------------------|
| 39722183 F 0-18:C>T-18:C>T | TGCAGATTGGATACATGTCGATACATACATCACATATGTATGTATGGATC<br>GCATCTGACTAAAGAGAGA   |
| 39717966 F 0-28:T>A-28:T>A | TGCAGTATTCAAATTTTATTTACCTTCTTACAAATCTTCCGAATTTCTAG<br>TCGAATTTTAC           |
| 46755385 F 0-23:T>C-23:T>C | TGCAGCATTGGTTTCTTTTTCCCTTTATTTTCATCTAAGTAGTCCTCTCGAGC<br>ATTTCCAGCCAGCATCAA |
| 39717776 F 0-8:A>G-8:A>G   | TGCAGTAAAGAGAAAAATGTCAAATTTGGTTCTTGCTTGCTGCAAGGTTT<br>ACATTTCTGAAAGCAGAAA   |
| 39722593 F 0-5:T>C-5:T>C   | TGCAGTCAAGGTTTGGTTCTAGCTAGCAATGTTTGATCTAGGGCAACAA<br>TGGCATGCTCCATGGTGGC    |
| 39714955 F 0-41:T>C-41:T>C | TGCAGATGACCTCGAACAAAGTCCTCTGATGCGTCGTCTTCTGGTCCCTG<br>ATTTGTTGAAACTCGGACC   |
| 39721706 F 0-30:T>C-30:T>C | TGCAGAGAAGACAGTATCAGGTGCAGATGCTGAGTATGAAAAGTTTCATG<br>GCAGATATGAAATGATTCTA  |
| 39719112 F 0-49:T>A-49:T>A | TGCAGCAGAAGTTAATATTTTCATCAAGAAGCTCCATCATATGACTAGTTT<br>TCTAAAGTCTCCAAACATT  |
| 39723249 F 0-68:C>T-68:C>T | TGCAGGATCCGACATGAAAGGCGGTAAATCGAAGTCGGAGTCGAAGAA<br>AGCAGACGCGAAGTAAGTTTC   |
| 39721088 F 0-7:G>C-7:G>C   | TGCAGTGGTAACATAACAGTAAACAGATGCCTCCTGAAGGGGCATGGAG<br>ACAAGAATGAAAGCTAAAAA   |
| 39722676 F 0-63:G>A-63:G>A | TGCAGCCCAGGAGGCTGCATCGTGGAGGTTTTTCGTCGAGCTGATCAGTT<br>GAAGTGCCTTGCCGACTTC   |
| 46756925 F 0-6:A>G-6:A>G   | TGCAGTAACAAATACTCTTGCTCCTTGGTATTTAGCTATCTGAATGGCAA<br>AAGTACCAATTCCACTTGA   |
| 39727818 F 0-64:C>T-64:C>T | TGCAGTCCATTGCAGTGTGAGTCATTTGTGTATCGTTTACTTTTCCAAC<br>TACAGAACTGAACCGAAA     |
| 39726738 F 0-48:T>A-48:T>A | TGCAGTGGAAAAACAAAGCGTTTGAGAAAGCTTTAGCAGTGTTTGATGAT<br>GACACACCTGAGCGATGGCA  |
| 39718559 F 0-48:A>G-48:A>G | TGCAGTTAGACACGTGAAGCCATCTGAAACTGAGCCTTATCAAGAATTA<br>TCATCTAGGTTTCAAAGGCT   |
| 39727626 F 0-57:C>A-57:C>A | TGCAGCTAGCAGTTCATCAACGATGAGCCACGAAGAAAGCAGCTCCAAC<br>AACAAACAACAAAAACAACAG  |
| 39726026 F 0-16:A>T-16:A>T | TGCAGCACTTACAGCTGAGTAATTTTTTTCATATGTAAGAAACCCACCATC<br>ATTCTTAGCCTTCCCATCA  |
| 39721050 F 0-59:A>G-59:A>G | TGCAGCACTCGCTCCACCGTCTGCTCCGCCGGATGTGGGCCCCCGGATA<br>CGCCGGTCCACCCAACGGC    |
| 39722421 F 0-5:T>C-5:T>C   | TGCAGTTGCAACTGAAGAGAAAAAGCAGAGGAAAGCAAGGAGGAGCA<br>GCAGTAGAGAATCAGGAGAGG    |
| 39722183 F 0-28:A>G-28:A>G | TGCAGATTGGATACATGTCGATACATACATCACATATGTATGTATGGATC<br>GCATCTGACTAAAGAGAGA   |
| 39728912 F 0-22:G>T-22:G>T | TGCAGGTGGCGGTGAAAGAGTGGATAGAGGCGCATTGGACGCCATTAG<br>AGAGATTAC               |
| 39716573 F 0-24:C>T-24:C>T | TGCAGCTTCCCTGCAAGTTACTAAACCCCATCATGAACTATATAGGGAGT<br>AATCTATCAGCCGGTAAAA   |
| 39721737 F 0-51:A>G-51:A>G | TGCAGAGACTTCAGCTTCAACAAAATTACCGGACCAATACTTGGTCGCTT<br>TAGGGAGTTGACAAAATTG   |
| 46768532 F 0-43:A>G-43:A>G | TGCAGAGAGGGGAAGTGCAGTGAAGAGCGAAATGAAAAAGGATATT<br>ATATAAATGGAATTTGTTGGC     |
| 39716799 F 0-58:G>A-58:G>A | TGCAGGAATAAGAAAATGTGAATATAGTTTCAAAGAGATCGTTATTAT<br>CACCTGGGTGGATCTCAGGA    |
| 46764263 F 0-56:G>A-56:G>A | TGCAGGAAGTGAATATTGATGAAATTATATTACTGCCTTTATAATATAA<br>AAAAGGGAAAAAAAATTGT    |
| 39727685 F 0-57:A>G-57:A>G | TGCAGGAGAAGTTGTCTCGCTCGAGCACGCGAACCAGGAAGCAGAATC<br>TAGGTTGAAGATTGCGCTTG    |
| 39721104 F 0-17:T>C-17:T>C | TGCAGAAAAAGAACAGATACTGAACTTATGGAGAATCACAAGGTAAT<br>AAACCAAAAGTTGGGTCAATC    |
| 39723032 F 0-50:A>G-50:A>G | TGCAGCTTCGTCTTCTTCTTCGATCTTAGGAGCCAAGTAGTATCTGATAT<br>AACCCATATCTTCAATTCT   |

|                            |                                                                         |
|----------------------------|-------------------------------------------------------------------------|
| 39727729 F 0-7:G>C-7:G>C   | TGCAGGGGGAAAAATCTCCATTATTAGCCATAGAAACAATTGGGAAACTTGATGTCTCTTCATTGAAAT   |
| 39719827 F 0-19:A>T-19:A>T | TGCAGATTTTGGATTAGAAAATTATCCCATGGAAAGGCCAAGCCATGAA GTTTCATTAC            |
| 39719530 F 0-11:C>A-11:C>A | TGCAGACGATGCGCTGGAAGAAGACACCATTAC                                       |
| 46771773 F 0-39:T>C-39:T>C | TGCAGAGGAAAAGGAAGCAAGAGAGCACAAGGTTTTACATGAAAGCAG TGATATGAAGACAGAGTTAGA  |
| 39720105 F 0-7:G>T-7:G>T   | TGCAGCGGGAGGTTTTGAATTTTTTAGTTTAC                                        |
| 46755030 F 0-30:C>T-30:C>T | TGCAGCAACGACTTGAACATTATGGACTCGCTTATCCAAACTCTTCTATG TAGAGTTAGGCAGATCTAA  |
| 39725551 F 0-29:T>C-29:T>C | TGCAGAAATTGACCCAAAAGTTTTGTGGTGTGTTGTTTCATTTGACCCTT TGAATAATCTCCAAATT    |
| 46772913 F 0-32:A>T-32:A>T | TGCAGATTTTTGATAAAAAGAAAAAAGATCATAATATATATTTATTAC                        |
| 39724679 F 0-15:T>C-15:T>C | TGCAGAATTTACGATTGAATTTGCTCGTTAC                                         |
| 39721074 F 0-46:T>A-46:T>A | TGCAGGTGTACCCAAGGAATCTGTCAAAGACAGTGTCCATGCAGTATAA AGTTGGTAAAACGGAAAGTG  |
| 46755133 F 0-68:A>C-68:A>C | TGCAGCACGACACAAGTTTATACTATGTGCATAACCAAGAGTTCTATGA ACGATGAATTCAGTAAAAA   |
| 39727341 F 0-68:C>T-68:C>T | TGCAGAAAGCTCCAACAATGGCGAGAGAGAAGAAGAGAGTCTTATAGA GAAGCTGACGTCATAAAGCGC  |
| 46767191 F 0-17:G>A-17:G>A | TGCAGGAGAAAATTGTCGGGTGTTATCGGTTAC                                       |
| 39725450 F 0-6:C>T-6:C>T   | TGCAGACAAGTGATGGTTATGCGTGGAAATGTTGCTTTTGAGGAGGGAT TAGTCTCATTACAGGAGGTTT |
| 39721526 F 0-29:A>T-29:A>T | TGCAGAATTGAAGAGAAAAGTGAGAGGAAATTGCAAAATGGCGAAGAC CCAGATAAGTAAATTGCGGTT  |
| 39723517 F 0-33:G>A-33:G>A | TGCAGGGTCAGTAGCTTGAATCTCATAGTGGATGCCATCGAGCTCGTGCC GAAAGTTGTCTTTAGATGT  |
| 39726448 F 0-47:G>A-47:G>A | TGCAGGCTCGCATTGCAGCCGCCGTGATATCTTGGCTGTGGCAAAGGG AATCCACTCGTTAC         |
| 39723438 F 0-68:T>C-68:T>C | TGCAGGGAATCAAACCACAAAGCACCAAGAAAACCTCAAAGGCAGTGA TGGAGCTCAATCAACCCACCT  |
| 39723615 F 0-38:A>G-38:A>G | TGCAGGTGACAATATCCCAGATGAATGAAAAGGATTACACATCGCATTCT GTTTCATGATTTTCATGTTG |
| 46763247 F 0-37:G>A-37:G>A | TGCAGATGTTTCAACAACGACGACCTCGCGAATTTAGGGTTTCTATGAAT AATGTCCTCTGTTCTCAGCC |
| 39721818 F 0-67:A>T-67:A>T | TGCAGAGCTCTCAGCAGAGATACAGAGAAAGAGCGGGAGAAGCTGAGC TTTGGACAGAGAGAGAGAGAG  |
| 39724733 F 0-19:G>T-19:G>T | TGCAGAGAGGCCGGCACCAAGGGGCCAGATTGGTTGTAATTAC                             |
| 39726040 F 0-15:A>G-15:A>G | TGCAGCAGAGCGCCAAAATAACAATAACAATGTTGACAAGGAGATGAC ACTATTGAAATTTGTGGATCT  |
| 39722706 F 0-6:T>C-6:T>C   | TGCAGCTGTGTTTGAAGAGGTGACTCTGTTGATGGACTTATCAATGCAA GGCCAACCTTCTAGTAACC   |
| 39717323 F 0-29:C>T-29:C>T | TGCAGGGCTTATGGCATAATATAGTCCGGCAACCTGAGCACTATAAGCT GCAAGACAAGAAAAGTTTAG  |
| 39722985 F 0-34:G>C-34:G>C | TGCAGCTGGTGAGCTCCGGCGGCCATATTGTGGCGTCGAGGACTCTCTAC GGCGGCACTCATGCGTTGC  |
| 39716753 F 0-15:A>G-15:A>G | TGCAGGAACAGTTGGAAGACAAGACGAAGATAGTGTTCGGATGACGAC GAGCAACGACACGGCGGTGC   |
| 39719801 F 0-5:A>G-5:A>G   | TGCAGATTCTTCAGAGCCACCGATTAC                                             |
| 39725286 F 0-18:C>G-18:C>G | TGCAGTCTCCCAGGTCTTCACAAATCAACCGCTTCTCTTTTAC                             |

|                            |                                                                             |
|----------------------------|-----------------------------------------------------------------------------|
| 39727507 F 0-7:T>C-7:T>C   | TGCAGATTTGTTTTGGGCAATGTAGTTCGAATGGGGCTACCAAATAAA<br>CCAACCAATCAGTAATCTTA    |
| 39729148 F 0-30:C>A-30:C>A | TGCAGCAGCTGATTCACGTCTTCAGCAGATCAAAAACCTCCATTTCGCTCCA<br>TGTAAGTAATGAATTACAG |
| 39729485 F 0-49:T>C-49:T>C | TGCAGGTCAGAAGTACAAAAGCTGAACTTTTTAGAGCTTGTGTTATTTAT<br>CTGTATCTGATTAC        |
| 39721918 F 0-53:A>C-53:A>C | TGCAGAGTGAGGTCATTGCCTCTGCTTCTTTGGTGTGGAGTGATGATGAT<br>GGTATGCACGAAGTGAGAA   |
| 39727056 F 0-6:A>T-6:A>T   | TGCAGCAAACACGTATATTCAGGTTTGTCTTTTAGCTTTTTTAC                                |
| 39724431 F 0-60:T>C-60:T>C | TGCAGTTTCTTATTTTTGATTGAATAATTGATTCTTGAACATGGGCAAAT<br>GAGAGTCAAATTGGAACT    |
| 39719314 F 0-20:C>T-20:C>T | TGCAGAAAAGCAATAAAAAACGAGTTAC                                                |
| 46760929 F 0-24:C>T-24:C>T | TGCAGCTTCTTTGCTGATCGTTGACAAAAGTTTTGCAGCAGTGTTAATTA<br>C                     |
| 39719603 F 0-27:C>T-27:C>T | TGCAGAGCAGTTTGAACACAAGAATGACAGCAGGGTTAC                                     |
| 39719525 F 0-15:G>A-15:G>A | TGCAGACCTACTACAGCCACCTAAACTTAC                                              |
| 39717421 F 0-45:G>T-45:G>T | TGCAGGTA AAAATCGCCGGTCGCCATTGAATTTCCGCCAAATCATCGTCCT<br>CACCTTCTAAATCCCAAC  |
| 39715732 F 0-35:G>T-35:G>T | TGCAGCATGCAAATACAGCCGGCAGAACTTCTCCAGAATTCCATTACTAT<br>TATATCCTTGATCACCTGA   |
| 39727400 F 0-62:C>A-62:C>A | TGCAGACCAGGCACCCCTCGAGTTTCACATTATTATATATATCATATG<br>CTCCAAGATGAACGACTT      |
| 46754847 F 0-10:A>G-10:A>G | TGCAGATTATATACACCTGGAGGTGCGATGTCCCACTAAGTGACAGCAGG<br>ATTTCTGCCACAAATAATG   |
| 39720050 F 0-43:A>G-43:A>G | TGCAGCCCTATGAACTAACCTGCCTGATCTGGCTGGATTGCGCATAACAG<br>GTCCTTTTAC            |
| 39725600 F 0-59:A>G-59:A>G | TGCAGAAGGAGGACTGTTCCGGTAGCGTACATCTTCGTCGACGTCGAGT<br>TTATTCTACTAATGTATGGC   |
| 46757447 F 0-66:G>A-66:G>A | TGCAGTTAACTTTTCTTTCTGGATGGTCTGCATATATATGTTCTGAAT<br>TGTTCAATGTTGACTGGT      |
| 46755617 F 0-30:A>T-30:A>T | TGCAGCCTGCTTCTATAACGCAAACGAGTCAGAAATCACAACCCAACTC<br>CAAATCACAGCTCCAATGAA   |
| 39714280 F 0-34:T>G-34:T>G | TGCAGACTCCTCAAAGGACAATAATAAAAAGGATTGATGGTTGTTTGT<br>GCGTAACTAAAGGGGAAGAA    |
| 39721702 F 0-37:T>G-37:T>G | TGCAGAGAACATGGGAGCGAGCAAAAATGGCTACTACTTTGGATTGTGT<br>TGTTAAGCATATGTGCTTTG   |
| 39723641 F 0-29:C>G-29:C>G | TGCAGGTGGTGTGGAAAATCAATCCATAGCTTAGCCTTCTTTGTCTGTCA<br>TGTTGTTGCTGCTGAGGAA   |
| 39714164 F 0-45:A>G-45:A>G | TGCAGACAGTTCAAGATGTTATCAGACCTCAGGTAGCTACACCAAACA<br>TCGGACTAATTGTATGGCAT    |
| 39718623 F 0-61:T>G-61:T>G | TGCAGTTCAGTTGTGGGTGGATGAGAAGCAATACTACAACCTATGGCACC<br>AATACTTGTGCTTCTGGTAA  |
| 39715299 F 0-55:C>A-55:C>A | TGCAGCAACCGGTAATTCTATCTTCTCTCTGATATATTGTTGCCAATGA<br>TCTGACACTGTTTCGTTTTT   |
| 39719742 F 0-22:A>G-22:A>G | TGCAGATGAACCCACCTCTCAAACCTGACTGGCTCACTATTAC                                 |
| 39722951 F 0-67:C>T-67:C>T | TGCAGCTGCAAATATTTTCATTAGCTAGTGACAACCTTTGGTAGCCATTG<br>CTCAAGCTGTCAACAACCA   |
| 39717705 F 0-25:T>A-25:T>A | TGCAGTAAAACCTGAAAAAATAAATAGTAATGAACAGGCAAATTTTCA<br>TGCCAAACAACCTCAAGTAT    |
| 39718341 F 0-28:C>G-28:C>G | TGCAGTGCATCTCCGGTGATGCGCCAAACCATAGACTTTGAGGCGGCGG<br>CTGCGAGATGCAAGGCGCCG   |
| 46755871 F 0-67:T>A-67:T>A | TGCAGCTGAAAACATCACATTTGGTTTCCATCAAGGTTCAAACAATAATA<br>TTTTATTTTATTTTTTTA    |

|                            |                                                                        |
|----------------------------|------------------------------------------------------------------------|
| 39718664 F 0-49:T>C-49:T>C | TGCAGTTCTAAAATCATCTGCATGCTGCAATTTTCATAAAATTTTGCCTCTTCTTTAGCTGAATAAGA   |
| 39713496 F 0-19:T>A-19:T>A | TGCAGAAACATGAGAGGGGTGAGTTTTTGGGATCAAACATATATGGGGTGTGGTTCTGATCTGTTGG    |
| 46761060 F 0-29:G>A-29:G>A | TGCAGTCTATCATATAAAATAGTTGTGCATGCATATAAGCTGGTAAATTAC                    |
| 39718400 F 0-57:G>A-57:G>A | TGCAGTGGATATTGAGGAGATCTACTTTGATTTTAGAAAACAACGGTTATTTATTCTGAAGGAGAAGGA  |
| 39720112 F 0-24:G>T-24:G>T | TGCAGCGTACAACCCAGTAAACTAGTGATCATTGATTAC                                |
| 39727227 F 0-5:T>C-5:T>C   | TGCAGTGAAACGGTTCGTTTTATATTTAC                                          |
| 39718770 F 0-54:C>T-54:C>T | TGCAGTTGCTTGAACTTTCTGACCGACCTGGATTCTGGTATTTTTCGATCCAAACGCACCGTTTCCGAC  |
| 39715679 F 0-26:G>A-26:G>A | TGCAGCATATTGCATATAATCCTCACGATGTATATATTTTCTTTTGCCCCCTTTTGACTTCCAAGTTG   |
| 39714385 F 0-42:A>G-42:A>G | TGCAGAGACACATAAAGCCTGTAGAAAGTAGTAGCTAGCATCAAATTACAAATGGAAGCCCTATTATTT  |
| 39723139 F 0-19:T>C-19:T>C | TGCAGGAACTCCAATACCATCAGGATGCTGACCTCCAATTGCATAACTTTACATATGTTCAAGTTCAA   |
| 39717862 F 0-26:C>T-26:C>T | TGCAGTAGAACCATGCCCCGTTCCCTCTACCACGAGGAACAAGACGCCAAACCTTCGCCGAATGGGTA   |
| 39714579 F 0-66:G>A-66:G>A | TGCAGAGGCGCGTTCCTCATATCCAGCATGAAGCTGCAAGAAAGACAGAGTTCCATCACATCCTACGAA  |
| 39714027 F 0-26:G>A-26:G>A | TGCAGAATGAAAGTGCAAAAGATTGCGAATGACTTCAAACAATGACAGAGCAAGTCCAGCTCGAGAAA   |
| 39727227 F 0-21:A>G-21:A>G | TGCAGTGAAACGGTTCGTTTTATATTTAC                                          |
| 39715874 F 0-26:G>A-26:G>A | TGCAGCCAGGAAGTTTGAAAAGGAAGGAATTTTAGAGGAAATTCTTGAGCGTGCAAAAAGTAATCA     |
| 39716236 F 0-36:T>A-36:T>A | TGCAGCTAACTTAGATATATGGGATCATGGAGCTAATAGATCATAGGAATCTGTAACCATGGCCCTGAA  |
| 39717523 F 0-55:A>G-55:A>G | TGCAGGTGACAATATACACTTAGGTCATTTGGGTATATGTGTGTGTAAGGTGACAATATTAC         |
| 39719956 F 0-11:T>A-11:T>A | TGCAGCAGCCTTGTCATTATTCGGAGGTGGAGCGTTTTAC                               |
| 39713881 F 0-35:T>C-35:T>C | TGCAGAAGGCCAATTTTCACTGATGATTGGAGTGGTAGAAAATTCCCTTATCCATTTGGACAAGAGTGG  |
| 39725848 F 0-51:T>G-51:T>G | TGCAGATCCCTCTGGACATGAACTTCCCCTTGACAGAGAAGAGGCACAGGATAGTTTGGAAATTACTGC  |
| 39716534 F 0-11:A>C-11:A>C | TGCAGCTTATCAGCCGATTTCAGACTCTTATGGGTTACAGACCATAAGAAATTTGCACCTTCTTAGGG   |
| 39726804 F 0-13:C>T-13:C>T | TGCAGTTCTTCCCTCCGGTCTCCCACTTGGAACCAAACCCACCTCCATCATTCCACCCGTAGGATCGCCA |
| 39724064 F 0-15:T>C-15:T>C | TGCAGTGATTTCCCCTATGTGATTTGGTTGTCTGGTTGGTGAATGAATCATTTCATAATCAATTATGA   |
| 39721788 F 0-33:C>A-33:C>A | TGCAGAGCAGAGTCGCAAGAGAATCCTGGAGAGCACATGGCGCTTCCATCCAACCGGACCAGATCGGCG  |
| 39718369 F 0-62:T>C-62:T>C | TGCAGTGCTCCACAGAAAGCAGAGCAGCCAGAATCCTTGAAGAAGAAGAAGAAGAAGAAGAGTAACATT  |
| 39717247 F 0-15:G>A-15:G>A | TGCAGGGAACCAATAGTGTACTGAGTCAAGCTTTTGATTCTTTTTGAATTCAGGTTCTTGATTGG      |
| 39725882 F 0-30:G>A-30:G>A | TGCAGATGGGGTATATTCCTCTGTTTTATGCACTATTTTTTGTCTTCCAATAAAAACATATTTATT     |
| 39721309 F 0-16:C>T-16:C>T | TGCAGAACTGTTCACTCTGGTTGAACAGTAAAGTTCAAGGAGAAATATCACATAAATCAGATGTGCCG   |
| 39719367 F 0-19:T>C-19:T>C | TGCAGAACCTTTTTTCATCCTTTGTTTAC                                          |



|                            |                                                                            |
|----------------------------|----------------------------------------------------------------------------|
| 39726804 F 0-44:C>T-44:C>T | TGCAGTTCTTCCTCCGGTCTCCCACTTGGAACCAAACCCACCTCCATCAT<br>TCCACCCGTAGGATCGCCA  |
| 39720006 F 0-24:T>C-24:T>C | TGCAGCATTTATCCTTTGATTGGTTTTTCATCTAAATGGGAAGTCTTAC                          |
| 39725985 F 0-12:C>T-12:C>T | TGCAGCAACTCTCTTTTATTTCATCTCTTTTGTACTTGTAATGATAAAT<br>CTTCACAAGATTCCCTCC    |
| 39721105 F 0-21:T>C-21:T>C | TGCAGAAAAAGCAGTCAAAGCTGCATATTGAGTTTACTTATCAATTCTTT<br>TTCATGGTTGATCACTTGT  |
| 39713899 F 0-38:T>C-38:T>C | TGCAGAAGGTAAGTGTGTTTGTGGTATGGGGGATAAGTTGGATTCCCA<br>ACACCAACTAAATTTGGAAC   |
| 39719582 F 0-29:T>C-29:T>C | TGCAGAGACTGTTGATGAAATGCTCAAGGTGTTTAC                                       |
| 39720620 F 0-18:T>A-18:T>A | TGCAGTATACTCCTTCCATAAAACTTAC                                               |
| 39716714 F 0-24:A>G-24:A>G | TGCAGGAAAAATATCTTCGTTATCAAAAATGGAAATAAAGGAACTTACAT<br>CAAGCAATTTACCTTGAACA |
| 39722103 F 0-68:G>T-68:G>T | TGCAGATGGAAGTTCAGAAGCGACTGCATGAACAATTAGAGGCACGTTT<br>TAGTTATTCTCCCTTTTTTG  |
| 46760996 F 0-18:T>C-18:T>C | TGCAGGTAGACTTAAAATTGCCTCGTTAC                                              |
| 39726557 F 0-48:G>A-48:G>A | TGCAGGTTGGCTTGCTACAGGCTTACAGGTAAGCTGGAAGCACTAACG<br>AAAGTCCGAGGCCCTTCTG    |
| 39719258 F 0-7:A>T-7:A>T   | TGCAGAAAAAAGCAATAGTTATTGAAACTCATTAC                                        |
| 39714888 F 0-24:A>G-24:A>G | TGCAGATCCCTTCTTTTTTTTGATACAACAGGGTAAGTTAGAAGGAAGTT<br>TGGTCTACAATATGGTGAC  |
| 39713968 F 0-42:A>T-42:A>T | TGCAGAATACATCTCTGCTCTGTTGACATAAAACCTTAGATGAACAATGT<br>ATAGGATGTTGCTGACTGA  |
| 39728528 F 0-14:T>C-14:T>C | TGCAGACTATATATCCAAACTCCAATGCTCCTTCTGCACCATTTTCCTT<br>CTAACTCCATTTTTGTGT    |
| 39714727 F 0-17:C>G-17:C>G | TGCAGATAAAAGGAAATCTAACAATGCAACTCCGAAACAAGTTGCTGAC<br>AAATATGTAATGGAGTCTGC  |
| 39724565 F 0-29:C>T-29:C>T | TGCAGAAAAACGAGGTGGAATTAGTGCACCTTAC                                         |
| 39725002 F 0-16:C>T-16:C>T | TGCAGCTATTTTCTTTCTATTCTCTAAATATTTTCTAACTTGTTTATTAC                         |
| 39716476 F 0-61:T>G-61:T>G | TGCAGCTGGGGTTGAATATCACCAACCCCAATAAATTTACATAAAAAA<br>AATTACCAACTTTATGTACC   |
| 39725330 F 0-7:G>A-7:G>A   | TGCAGTGGAAATTGCATGCTTCAAGTTTGTACATTGATTTAC                                 |
| 39720463 F 0-16:G>A-16:G>A | TGCAGGGTTCAAGTAGGTGAATTCGTTAC                                              |
| 39718012 F 0-29:T>C-29:T>C | TGCAGTCAACCTTGCAATGCCAACCTCTTTGAAGTCATAGGTTACCCTTC<br>AACTTCTGTAATTACTCT   |
| 39718357 F 0-27:A>G-27:A>G | TGCAGTGCCTTTGCATACTGGCAAGCAAATTTGAATGGCTTCTGTAAGTT<br>ATATGCCTTTTTTGCGAAA  |
| 39714367 F 0-34:T>A-34:T>A | TGCAGAGAATAGGAAACAAAAGATTTCGAAGAATTTGCGGTGATTGTATG<br>TAACTACTTCCATGACAAAA |
| 39725126 F 0-44:A>G-44:A>G | TGCAGGGAAAAGGAAGAAGAGCATTGGAAGGGCAAATTTGGACCAAATT<br>AC                    |
| 39721022 F 0-64:G>A-64:G>A | TGCAGTAAGGGGCGAAGCATCCATTTTAGCGAACGAAGGGGAGCAGTCT<br>TGCACTAACGGCGACGACAA  |
| 39713637 F 0-53:G>A-53:G>A | TGCAGAAATTTATCCAAATATTGAGATCTCAGAATTAGAATCAGATCAA<br>GGAGGTGGTATGCTGATTTA  |
| 39715756 F 0-38:A>G-38:A>G | TGCAGCATTATCGATAAGGAAGAAGAGAGAAAGAGAGAACTCACCTCCT<br>TGAAGATTTCACTGTAAGAA  |
| 39719523 F 0-10:C>A-10:C>A | TGCAGACCTACACCCTAAAATCAAATCAACCAATTTTAC                                    |

|                            |                                                                         |
|----------------------------|-------------------------------------------------------------------------|
| 39721499 F 0-42:C>T-42:C>T | TGCAGAATGATTATCAAGTGTCACAACTGAATTGAGGAACACCAATAGCAAATGCTGATGATACAAAC    |
| 39719711 F 0-19:A>C-19:A>C | TGCAGATCAAGAGACCAAGAGAAATTGAAGAAATTTTAC                                 |
| 39719726 F 0-21:A>T-21:A>T | TGCAGATCCAAAACCTTACGCAACCCGGCTCACAGTACACATGGAAGTCTTAC                   |
| 39728232 F 0-9:G>T-9:G>T   | TGCAGATTTCGATTCTGGGCATGAATGTGCAACCTAAAGACTCGCAAGTTT TTTCTCTACTTCCCACC   |
| 39717178 F 0-52:A>C-52:A>C | TGCAGGCTAAGAGCATCTGTGTCCCATCTTCTCTCGGCATTTCACTACCAATAGGATCACCATTTACAG   |
| 39718324 F 0-22:T>C-22:T>C | TGCAGTGATTGTGTATGAGTCCTGAGGCCATTCTTCAAATATGTTTCTGTTCTTTGTTCTGAACATAATGC |
| 39721771 F 0-5:A>C-5:A>C   | TGCAGAGATTTAGTTATGAGTGAATAATGAGAGTTCCATCCAGTGATTGTTCTTCCATTGATTCAAAAT   |
| 46754353 F 0-34:T>C-34:T>C | TGCAGAGATGCGCAAAGCTGAAATCTAAGGAAGCTGTGAATCTGATTGA GAATCATAGTTGTGCATTGA  |
| 39714333 F 0-41:G>T-41:G>T | TGCAGAGAAAAGAACAATACAATATCACATATGTGTAAGCAAGAGATTATGAAAAATAGGGAAAACCTTCC |
| 39716974 F 0-39:G>A-39:G>A | TGCAGGATCATGTTGGATACCTCCACCAAATAGTATTTCGTTGCCATACA CAACAATTCCTGTGTGCCT  |
| 39717942 F 0-66:T>C-66:T>C | TGCAGTATCTCAACTACGACAGGACATGATTGGGTCTGTAATATTTGCCTTGAGTAAAAGAAGATGTAA   |
| 39723701 F 0-40:T>C-40:T>C | TGCAGGTTTTACCATCGATGGTGGGATGGTTATGTAGGTTGATTATGGA TAAAATTTGCACGACTAAG   |
| 39724634 F 0-16:T>G-16:T>G | TGCAGAAGAAAAATAATGAGAAAAAGTTATGCTTTGCACCAGAAAATGA ATTAC                 |
| 39726586 F 0-10:C>T-10:C>T | TGCAGTACAACCTGTGCTAAATGTCAACGAGGGGTCAAACACTATAAATAATATGCTAAGTTGGTGGGA   |
| 39715662 F 0-48:A>G-48:A>G | TGCAGCATAGAAGATGGAAAATTTGGGGCAATTTTGAAGCAATGCTCTA GTCCTTTCAAATAATTAGAC  |
| 39728828 F 0-9:C>T-9:C>T   | TGCAGAAACCAAGTACAAAATTCCTCTGATATAGACACCAACCGGAAGAAAAAATCTAAGATTTACAG    |
| 39719555 F 0-22:T>G-22:T>G | TGCAGACTTTGCAGTTTTGAAGTATCAATCTATGATATTAC                               |
| 39715078 F 0-29:C>T-29:C>T | TGCAGATTATAAACATTCTGACAATAAAACACTCTAAAACCATGGGCTTT ATTGTTGGACTAATTTTCC  |
| 39715855 F 0-32:G>A-32:G>A | TGCAGCCACTAGGGTTTGTA AAAAGTGTAGTGGCTTATATGGTGATGGA CGATCTCACTGTGAACCCCA |
| 39719867 F 0-30:C>A-30:C>A | TGCAGCAACTAGTGAACATAAACATAGAAAACCATCAAATTAC                             |
| 39718706 F 0-59:T>A-59:T>A | TGCAGTTGAAATCAGCCAATCACCAAAATTCTATTTCCACTCCAAACAGCAATACGATCTAGTAACAAT   |
| 39725103 F 0-14:A>G-14:A>G | TGCAGGCATCAAAGAAAACAAAATGAATTAC                                         |
| 39715219 F 0-14:A>G-14:A>G | TGCAGCAAAAAAGGAGTCCCAACCATTGACAAGGAAAAAAAATAGCAATAAAAGGCTGCTTCCGACAA    |
| 39719800 F 0-36:A>G-36:A>G | TGCAGATTCTGGATGAATCAATTCACAAGATAAAACATGAAGATTAC                         |
| 39725143 F 0-21:G>A-21:G>A | TGCAGGGGCTGCTAGTGGCACGATTAC                                             |
| 39723485 F 0-56:A>C-56:A>C | TGCAGGGGAATTTGGCTTTGGTGACTGCTTTGTTTGTGTTTAGTTTTGACTGCGTTAGAAACATCCATG   |
| 39710729 F 0-65:T>A-65:T>A | TGCAGTTGAATGTAATCTAACTTTGACATTGAAATCTTTTTGCTCTTGACAAATATGTTTCTCTTTCT    |
| 39722082 F 0-51:T>G-51:T>G | TGCAGATGCCAATGGTGGCAGTCAAGTCTGTTATGTAACCTCAACTCCACCTAGAAACACAACATCTTA   |
| 39716729 F 0-51:A>G-51:A>G | TGCAGGAAAGATCCTCAAGCCAAAAGAAGCTGCTACCAACACCAGTTCTGGAAGAAACATGGTTGCAGA   |

|                            |                                                                         |
|----------------------------|-------------------------------------------------------------------------|
| 39721619 F 0-68:T>C-68:T>C | TGCAGACCTATCCCATGCAAAGAACCTCACATGGCTAGAATGATTGACG TTCCTATTCCATGGATTTTT  |
| 39718475 F 0-17:G>A-17:G>A | TGCAGTGTACAACCACTGCTACCTGGTTTTTGCTACTTGGTTTTGCAACA AGTGGACCACTTTACTAAA  |
| 39714403 F 0-5:A>G-5:A>G   | TGCAGAGAGAAACCGCAAGTCTCTGTTGAATTGGATGCTGCCACTCTGG CCTGTCCC GCATGTGATTTG |
| 39720366 F 0-28:G>T-28:G>T | TGCAGGATTGAAATTTGAAATAATAAACGAGTGTTCCTTAC                               |
| 39721523 F 0-66:T>G-66:T>G | TGCAGAATTCAGTTGGTTGGTCTGTCTGTTACTTCAAGTTCTTGTTCCTTG ATGAATTGGAGCTGTTGC  |
| 39729336 F 0-12:T>A-12:T>A | TGCAGGGCCTTGTAAGGCAACACCTCTGAAAAGCTGAAAATCAAACCTCC TAACGGCTCTTTAC       |
| 39719887 F 0-30:A>C-30:A>C | TGCAGCAATAAATGCTCCCATTTGTGCACAAAATATACCAAGAGGGAGC CCAAATTAC             |
| 39723076 F 0-26:T>C-26:T>C | TGCAGCTTTCTTTCTGACTTCAGCTGTGGCACGAGCAGCTCTCTCATCTA CACCTTACCACGAGGAAG   |
| 39720304 F 0-35:C>T-35:C>T | TGCAGGACCAAATCATAGTTTTTCATAATATGAAGACATGCAATTAC                         |
| 39727080 F 0-18:A>C-18:A>C | TGCAGCATGATCATCCTAAAAACAAAAGGCTTTAC                                     |
| 39722005 F 0-46:G>A-46:G>A | TGCAGATCATAGACAAAAGAAGAAAGATTATGAAGACAGGTGGGGAGA AAAAAGGATCCTTTGAAAACC  |
| 39724650 F 0-30:T>C-30:T>C | TGCAGAAGGGAAAGCTTTGCTTCAACCTTTTATATTGCCTTCCCTTGAAT TAC                  |
| 39728199 F 0-67:C>A-67:C>A | TGCAGAGGAGAACTACAGAGTAGAAAATGGGCCAGCAAAGAGACGAA CGTGTGGGAAAAGAAGGCC     |
| 39715107 F 0-37:G>A-37:G>A | TGCAGATTCGACCAAAGGTGGGCGTAGCGGCACACTAGCGTTTGATGCC ATTCGGGATAGCTTGCGGAA  |
| 39720104 F 0-5:T>C-5:T>C   | TGCAGTGGCGAATCTAAGGTGGGTTTTTGAATGATGAGAGTTAC                            |
| 39714465 F 0-47:C>G-47:C>G | TGCAGAGATGTTGGCATAGGCCATTGATGGCAACATTTATGAGCACACG TAGGAAATTTGAACTAGAG   |
| 39724820 F 0-45:A>G-45:A>G | TGCAGATGAAAGAAAAAAGAAAAACTTTGAAGCCCAAAGGGAAATATT AC                     |
| 39722327 F 0-56:C>G-56:C>G | TGCAGCAATTGTTGGATGTGTGAATGCCATTCAATTTAGAATTAGCTCTC GTCTAACTGCTAATGCTTC  |
| 39724751 F 0-41:C>A-41:C>A | TGCAGAGGAAAAGACCCAGTACCTTATTTGAATATACGCATCAAATAT TAC                    |
| 39718914 F 0-8:G>C-8:G>C   | TGCAGTTTGCCCATGGATGAAGCAACAACATTTGTTTGTGTTACTCATC CATCTCTTGGATTACTTTT   |
| 39726764 F 0-57:C>T-57:C>T | TGCAGTGTTCCTTTGGTGTGCATGCGTTTGGTGAAGGGAAGGAGAAGGAC AGATCTAACGCTTTTGCAGC |
| 39729260 F 0-8:G>C-8:G>C   | TGCAGCTCGCCAGTCTGCACAAGGTCTCTTTTATGTTCAGTATTCGGTG GCGTAAAGTGCTATTACAG   |
| 39722569 F 0-38:A>G-38:A>G | TGCAGCATTTGACAACAATGGTAAGGGACAAGCTAATAAGAAATCCACT TCTCCTGGTTCTTCTGTAGT  |
| 39725305 F 0-21:G>A-21:G>A | TGCAGTGATCCTAATGGTAATGAAACCATTGAAAAGTTATGACAATATG AATTAC                |
| 39718688 F 0-66:C>G-66:C>G | TGCAGTCTTCCGCCATTTCTATGTCTCTCTGCAAAAAGCTAGAAACAGA CTCTCACCATCTTTTACGA   |
| 39718232 F 0-61:C>A-61:C>A | TGCAGTGAACCTCTAGATGGGAAAAAAGAAATTATTGCACAAAGAAAGA ATTAGAAATCGACTGTTGTA  |
| 39725214 F 0-7:C>A-7:C>A   | TGCAGTACAAGCAACCAACAACATGTTAC                                           |
| 39719553 F 0-5:T>A-5:T>A   | TGCAGTCTTGTGGTACATTCAAACCTTTGTTTATTAC                                   |
| 39725144 F 0-35:T>A-35:T>A | TGCAGGGGGAAGGACCCTGATGCCGAGGCACACATTCCATGGTGGTAGG TGTTTTTAC             |

|                            |                                                                         |
|----------------------------|-------------------------------------------------------------------------|
| 39720178 F 0-7:T>C-7:T>C   | TGCAGCTTTCTGTGAAAAATTCTCATTTCAAATAAGCAAATTAC                            |
| 39715509 F 0-43:T>C-43:T>C | TGCAGCAGAGTTCTTGCTCTGTTGATCATATGGAGTATCAAGGTAGAGTTTAGGCCCCCGTTTGATAAC   |
| 39727814 F 0-66:A>C-66:A>C | TGCAGTCAGCAGTTCCTATCAATCCAAGAGATTTTCTTTTTGCCACACTGTTGGGTCACCCATTTAGA    |
| 39719996 F 0-29:C>G-29:C>G | TGCAGCATGTATATGTCTAAAGAACGTTGCTCATTTTTCATTAC                            |
| 39727438 F 0-10:C>A-10:C>A | TGCAGAGATACTATAGATCATCAATCTACTTTTATATTCAAGACCCTTATGTGCGATTTACTTTTTCTT   |
| 39727216 F 0-31:C>G-31:C>G | TGCAGTATTTCCAGCTCCAAATAGCCTCAGGCCAGGTACTTTAC                            |
| 39727733 F 0-9:T>A-9:T>A   | TGCAGGGGATAGTAAGTTACGCAAAGAGCTATCGTGGAGTCACATAAAATATATACAGAAAGTAAACC    |
| 39720137 F 0-7:A>G-7:A>G   | TGCAGCTAGTTTATGATATCAGGATATTATCAACATTAC                                 |
| 39728180 F 0-6:T>C-6:T>C   | TGCAGATGGTGTTTGCTGTTAGTGGAATGCCCGACTATGGATGCTGTAA TTCAGTCTTGATTAGTTGT   |
| 39721493 F 0-37:A>C-37:A>C | TGCAGAATGAAAGCAACAATCGCCACCACAAAAACGTAAAGTTCATGTGTGCTGATGTAACCTCTCCAG   |
| 39724154 F 0-46:C>T-46:C>T | TGCAGTGTACCATCGACCATTTGTGGCTCACCACCGCCGTCACACCGGACTAGTGTGTTGGGTTCTGT    |
| 39719507 F 0-35:C>A-35:C>A | TGCAGACATAATGTGAACAAACCCACGATATAAAGCGAGTATTAC                           |
| 39717394 F 0-5:G>A-5:G>A   | TGCAGGGTGAGTACTAATTCTAGATTTAGCCTGTGTGGTGCTTGAAACTTTTCCTAACTGCTACTGAC    |
| 39726936 F 0-32:T>C-32:T>C | TGCAGAAACAACACCAGTAACTCATGCAAATAAACCAAATTTATTTAC                        |
| 39725331 F 0-25:G>T-25:G>T | TGCAGTGGACCATGGTTGGATATTTGCTTTTACTATTTTACCCTTTTTTAC                     |
| 39715214 F 0-52:T>G-52:T>G | TGCAGATTTTGTGTTTGAAGTGCCAGGTTGTTTCTGTTTTTTTCTTACATATTTCTAAAGTGCATTTTG   |
| 39715005 F 0-26:A>G-26:A>G | TGCAGATGCTTCGTGCGAGGGGAAAGAAGTGCGACTATCAGCCAATATTATATGAAGTCATAATTAGG    |
| 39717973 F 0-63:A>G-63:A>G | TGCAGTATTCTGCTTGAATTTTCATTTTTTCTGCTTTCTTGGTCACATCAATATGATGCACAACCTAT    |
| 39714874 F 0-10:A>T-10:A>T | TGCAGATCATACTCCCAGTTTCGTTCTCGTCAACAAGGAACCAGAGCCTGATCCTGAAGATCCATCAAA   |
| 39715784 F 0-6:A>G-6:A>G   | TGCAGCATTTTCACTGGAGAAGTTTCCAGAGCATATCGCTCTCTGGTACTGAGTAGATACGGCATTATTA  |
| 39721586 F 0-60:G>A-60:G>A | TGCAGACATAGTTTTGATTGCTTACATTTTATAATAAGCTACATGTCATTATTTCTTTTCGATCTTTTC   |
| 39722528 F 0-15:T>A-15:T>A | TGCAGCATCCCTCCTTGCGGTTTTGCACTTATTTTCCAGTCTCTCGTTGTTAGTGGTATTCTTCCAATA   |
| 39717695 F 0-66:C>A-66:C>A | TGCAGTAAAAAAAACAAATTGCTACAGTAATACTAGTTTTTTTACCTCCTCTATTTTTTCATCTAACCAT  |
| 39715674 F 0-46:C>T-46:C>T | TGCAGCATATGTGAAGAGTTGGTTATAAACTTCTAAAATATTTCCACACATAGATACAATTTCTTTCAC   |
| 39722568 F 0-19:G>A-19:G>A | TGCAGCATTTGAAAAGAATGATTGAACGTGATAGTACATAATAATTGAAATTACATGACAAGTTGGAAGT  |
| 39721473 F 0-53:G>T-53:G>T | TGCAGAATATTTCTTTTCTTTGAATCTCTTTTACCTCAAATAGGATCTTTTGGATATTTCTATATTTA    |
| 39726489 F 0-35:A>G-35:A>G | TGCAGGGTATTTATAGCGGTGAAGAGTGAAGACGCAGTGAAGACGAGCGATGAGGAGGCAGCTTCCCAC   |
| 39721673 F 0-41:T>G-41:T>G | TGCAGACTTCCAAATGCTTCAAGTTTTTGGCTATTCTTAATATTATCAATTCAGCAATGCAGGCATTTCAT |
| 39715981 F 0-11:G>T-11:G>T | TGCAGCCGCACGCCACGGAAAACCTCTGTCTCCTTCGATCGTCTTCCCGTTACCAAATCCGCACCGTAA   |

|                            |                                                                            |
|----------------------------|----------------------------------------------------------------------------|
| 39715042 F 0-46:A>T-46:A>T | TGCAGATGTAGAATTTGAATTGTCTACCTGTACTTCTCTTTTCGTGGACAT<br>CATTATGATACACTGAATA |
| 39714239 F 0-44:G>C-44:G>C | TGCAGACGATGTTATTTTTATCTGCAAATAACAACACCAAATTAGTTGAG<br>TTAGCTTCTCACATAATTT  |
| 39716132 F 0-19:A>G-19:A>G | TGCAGCGATTATCGACGACAACGAGACGGCGGGCGGGCGGGCGGGC<br>CAAGGCGGTGCTCTGTGTTTC    |
| 39714302 F 0-11:T>C-11:T>C | TGCAGACTGTGTAACACCTGTAGGTTTCCCCTTTTGATGGACCTGATGAA<br>GCGATTTTTTGAATCCCT   |
| 39729506 F 0-16:A>G-16:A>G | TGCAGGTTGACGACGCAACGACATACTCATACCACGAAATTACGTAGTT<br>TTCTTACATCGGTTTACAGA  |
| 39717837 F 0-10:A>G-10:A>G | TGCAGTACCTATACTCATGGATTCTTCAACCCACACTAAAGCTACTTCAG<br>TGGAAACACCTACAAATTC  |
| 39726631 F 0-24:C>T-24:C>T | TGCAGTATGTTGTTGGATCAGCTCCTCTTTGGAAGGACCATCAATAGTGA<br>TGATTTTCCCAAAGATTGA  |
| 39722087 F 0-5:C>A-5:C>A   | TGCAGCTGCCTACGCTGTACGCTTCTTTTGATATTTTTTGTGACCTTGTAC<br>ACACATCCCCCAATTGGA  |
| 39714242 F 0-21:A>C-21:A>C | TGCAGACGCAATGGATGGGGCAACAACGAATCCAACAATCTCATTCA<br>TTACCAACACGAGGATAAAT    |
| 39720274 F 0-36:G>C-36:G>C | TGCAGGAAAGTATATGATCAATGCATGACCAAAGAAGAACAATACCTGC<br>CATTAC                |
| 39714174 F 0-10:A>T-10:A>T | TGCAGACATGAGAACATTATAACATTATGTTCTTTTATGGTAGGTGACTT<br>TACTCGGTTTCGTTTGTGG  |
| 39714396 F 0-17:G>A-17:G>A | TGCAGAGACGGCGGGCAGGAGGCAGAGGAATGCGCAGAGAGGAAGCAT<br>TTTTGGATTGTGGGAATGGGA  |
| 39720248 F 0-45:A>G-45:A>G | TGCAGCTTTCTGGGTACTTGCAGTGGCTGGAGGAGAGAGAGGATGATCA<br>TAAAGAAGATCGGAAGATC   |
| 39722187 F 0-13:C>A-13:C>A | TGCAGATTGGTTGCAGGAATCAGCTCCAGAATTCTGGGTGTTGGAAGCT<br>CTGTGAGGACGATGAAATCG  |
| 46753849 F 0-39:C>G-39:C>G | TGCAGAAGAAACGTAACACCGACCCCTCACCTTCCCTTTCTGATGGGTTC<br>CAAAGTCATGCATTTTTTT  |
| 39716318 F 0-38:A>G-38:A>G | TGCAGCTCAGATTAGGCCTTTGATTTACTGTGTTTATTATGGCTTCTTTGA<br>ATTTCAAATGTTGAAAAA  |
| 39725021 F 0-18:T>A-18:T>A | TGCAGCTGCTTCTTCTTGTGTGTCTAACCAAAAAAAAAACCAAAAAGTGAT<br>TAC                 |
| 39725890 F 0-68:A>T-68:A>T | TGCAGATGCCATTCGCACAATTCTTGGAAATTTTCGGTGGGTTTTGTTTCTG<br>TTTCTGTTTCTGTTTCTA |
| 39723415 F 0-15:T>C-15:T>C | TGCAGGTTTGGAGGATGAGGGAGTGGAAATTTTGAAGAAGTGTGAGGAC<br>AAATTGGGAATTACTCGTCG  |
| 39717095 F 0-23:T>C-23:T>C | TGCAGGCATAGAGGATATGAATATGCTGGTATATGGTCCCTAAACTTTAT<br>CTTGTTACTGTTGTTTGT   |
| 39724155 F 0-61:T>A-61:T>A | TGCAGTGTATATGGAGAGAAAAATAAATGCTAACTGCTAAACTCAAAC<br>CTGAGGCATCACTCATTTTT   |
| 39721537 F 0-62:G>A-62:G>A | TGCAGAATTTCTTGGACTTTAGCTTTGCATGCTTCACATTGAACACTTGC<br>ATTGAGAACACAGCTCTGC  |
| 39718045 F 0-5:T>C-5:T>C   | TGCAGTCAGATCCTTCAAACAATATATATAAATATATATGTATATTCACC<br>TGTCCATGTACTTTACAGA  |
| 39713712 F 0-33:A>C-33:A>C | TGCAGAACCTATCTCATCCTCTTTTTGCTAAGGAAATTCAAGGTTTGTGG<br>CTGATCTTCAATTTGGAC   |
| 39714613 F 0-34:G>A-34:G>A | TGCAGAGGTATATACTATATAGTCCTGTGATCATGAATATTTAGATCTAA<br>CCGTATGATGTGAGGTGTT  |
| 39723458 F 0-49:C>A-49:C>A | TGCAGGGATATTTCTCTCAATTGGACCTGGCGATCAGAATGATACCAACC<br>ATCAGAAGCAATAGCACAG  |
| 39716905 F 0-7:G>T-7:G>T   | TGCAGGAGCCATCACTATATTCATGGTTGCTTCTTTATCTGTATGGATTA<br>CGTTTTATGATCGAATAAT  |
| 39726777 F 0-31:T>G-31:T>G | TGCAGTTATTCTATTGTTCCACCTCAGTTTATTCTTGAAGAACATTTGAAG<br>GTCCCAAACAACCTAA    |
| 39723863 F 0-5:T>C-5:T>C   | TGCAGTATCCTCAACAAACGCGCGGTGATTGTCACCTCTCCTCCCTATGC<br>GTGTGGGATTTGCTTTTT   |

|                            |                                                                          |
|----------------------------|--------------------------------------------------------------------------|
| 39716850 F 0-10:T>C-10:T>C | TGCAGGACGATCAGCTCCTAGTTCATTTGAAACTCGCGTGCTTATGAAATGAAGTAAGGACAGAAATCT    |
| 39715902 F 0-45:T>G-45:T>G | TGCAGCCATGGCTTTGTTTGCTTATTGCCACTTTTCTTCATTTTCCTTTGAAAAACTCAGTACAAA       |
| 39725918 F 0-53:G>A-53:G>A | TGCAGATTGAAAAGCACTTCAACGACTTTGATCTCCCCCATGCTATATAGAGATTATCTCTCTCTCT      |
| 39716485 F 0-41:G>T-41:G>T | TGCAGCTGGTGGTTTGTGTTGCTGTTGCTGGTTC AATATTGTTGCTTCGT TCACTGAGATTATTGGCT   |
| 39719599 F 0-9:A>G-9:A>G   | TGCAGAGCAAAGGGTGTA AAGAGAGTTTTAC                                         |
| 39725228 F 0-40:G>A-40:G>A | TGCAGTAATAAACTGGATGTATAACTTCAGCAAAA ACTTGGGAGCTTAT CGAGGGTTTTAC          |
| 39715360 F 0-10:A>C-10:A>C | TGCAGCAATAAGTTGCTCTATGACATTTAGATATAGGTT CGAAAACCGTT AGATACATATTCAAAATAT  |
| 39718044 F 0-59:A>G-59:A>G | TGCAGTCAGATAAAGCCTAATTAGATGCAGAAACATAGGCTAGCCAGTTTGATATTTACAAGTATAAAA    |
| 39726536 F 0-49:T>C-49:T>C | TGCAGGTGAGTGTCTTGATCCAAAAAATACCCTTGA ACTATAGGGAA TGACATATTCTAGTGATTTT    |
| 39715239 F 0-59:T>C-59:T>C | TGCAGCAAACACTTGTCTTTT TAGTGCTCATTGTGCTTGAATTAGATTACT TGTCTTAGTTTGTAGTTC  |
| 39717866 F 0-31:T>A-31:T>A | TGCAGTAGAATAAGTAGCCATTTTAGTCATATTGCAGCATCAATATGAA GCAAAGTATATAGGTAATAA   |
| 39722247 F 0-34:G>T-34:G>T | TGCAGCAAAGTGAAATTTATTTTATCATAAAAAAGA ACCTAAAAGACAT GGAGAAACCAAAGACATCTT  |
| 39717452 F 0-61:A>C-61:A>C | TGCAGGTACTGATTTTTGCACAAGATCCAGGAAGTGAGGTATTTCCTCAT CCTGTGGGTTTAGTCTGAA   |
| 39721236 F 0-26:C>T-26:C>T | TGCAGAAATGAAAAACAAGGAGACCGCCGCTGATGCCGATCGTCCATGG CAGTCTTACAACACTGTCTA   |
| 39725959 F 0-6:A>G-6:A>G   | TGCAGCAAAGTCAAATATGTTGCATACAAGTACAGTTGAAGAATGGA AAGTGTAACAGTTGCATAAA     |
| 39717271 F 0-59:A>G-59:A>G | TGCAGGGAGACCTACATTTTACTCATTCTATTACCTTTTAGCTCAA AATTT TGTTCCAAATTCCTTTT   |
| 39728166 F 0-29:C>T-29:C>T | TGCAGAATCCAATGACGAAAAA ACTTTGACGCTCTCATAAGTGAAATCA GGGAGTTTGTAATAGTCTTG  |
| 39715418 F 0-34:G>A-34:G>A | TGCAGCACAATTA CTATAAAGGGAAAAAGGAAAAGGCCTTAGCTTTTTT CTTTCATTTTCATCACATCTC |
| 39729557 F 0-13:G>A-13:G>A | TGCAGTTCAAAATGAATCTGTTCCCATGCTTGCCACCTTTTGAGGACAA GAGAGGTCCCTTTAC        |
| 39725009 F 0-7:G>C-7:G>C   | TGCAGCTGTTAGCTGTACAAAAGAAAAGTGTAGGAAAAGTAAATTTAC                         |
| 39727282 F 0-34:T>C-34:T>C | TGCAGTTTGATATTCAACGAGCGAGTTTTTGGTTTCTGGATTGCTTTTCT TTAC                  |
| 46764503 F 0-14:G>A-14:G>A | TGCAGGCTCAAATAGCACTATTCCAAACTCTCCCAACGATGGTCACCTGT AACTGGTGCACAAAACAAC   |
| 39713644 F 0-19:A>T-19:A>T | TGCAGAACAAAAAAGAGAAAAAGAGCCCTAATAAAATATATGTTCTTT ACTTGGTGGATTGTTTTTAT    |
| 39716592 F 0-61:T>A-61:T>A | TGCAGCTTCTCTACCTATTCCCAACTCTGCTAGAGGCAGTGACATTCTTA CGTGGCTGCCTTCTCAAAA   |
| 39727151 F 0-46:C>G-46:C>G | TGCAGGCAGATAAAGATAAACTTTGGATCACTTACAAGGTAATGCACCT CTCAGTTTTAC            |
| 39716574 F 0-57:G>C-57:G>C | TGCAGTTCCTGTCAATAGATACACGAAGGTTCTGGGGCACACCAGCCTT TTGGCAAGGCAATGTCTCT    |
| 39726968 F 0-6:A>C-6:A>C   | TGCAGAATCTAATGGCAGCAAGGACTTCATTTCCCTCAAGATTGAGATT AC                     |
| 39717030 F 0-68:C>G-68:C>G | TGCAGATTTCAAATTC AAGGTATATATATTATGCTTTCTTACTAAGAAA CACAAATACTTTAGTTTGC   |
| 39721403 F 0-61:A>C-61:A>C | TGCAGAAGGCATCAATTTGTATCTGAGCTAAACAAGACACGTGCCACTA TGTCGAAACTCAAGTCAAAA   |

|                            |                                                                         |
|----------------------------|-------------------------------------------------------------------------|
| 39720476 F 0-13:C>T-13:C>T | TGCAGGTACTIONCACCTTTTCATGGATTAC                                         |
| 39724742 F 0-5:A>G-5:A>G   | TGCAGAGCAAAAACCATAACTACATCTTTCCAAAAGGAGAATTTAC                          |
| 39729119 F 0-27:C>T-27:C>T | TGCAGAATGAATCGGTAACACCTCATTCCCTCTAATTATTTCCCTGCTTGCTTTTAC               |
| 39724618 F 0-9:T>A-9:T>A   | TGCAGAACATTGAACTTTAGAACGACCTATGAGATTTTTTAC                              |
| 39728967 F 0-20:G>T-20:G>T | TGCAGGAACAAAATGGTGGTGCTTCGGTTCCACTTCATGAGAATCAATCCAAATTCACATTTAC        |
| 39718735 F 0-35:G>A-35:G>A | TGCAGTTGATGCCAACTTTTTCTTTTATTATTATTGTTGTTGTTTTGTAAACTTCTTTTAC           |
| 39723761 F 0-42:T>C-42:T>C | TGCAGTAATATCTGCAATGGCAGCAAAATAAATTGATATGATTAGAAAAGCTAGATATTTTTGCCCTCTT  |
| 39725885 F 0-63:C>A-63:C>A | TGCAGATGATATCTCTACCTTATAATATTTCCGAGACATGGGCACTATTACAAAACCTTCCAACACTTC   |
| 39724060 F 0-68:C>T-68:C>T | TGCAGTGATGCTATAACTGTTCTAGATCTAAGAATTCTAGCTTATCCCTTATCACCCCATTTGTTATTAC  |
| 39717151 F 0-54:G>T-54:G>T | TGCAGGCCTTCGAAAGCTTTCTTTTCTCCTTCTCTCTGTGAGTTGCTGCTTGCTCTTAGACGTAAT      |
| 39716666 F 0-14:C>A-14:C>A | TGCAGCTTTGAATCCTCTAGATTTTCATTGTTTCAGACACTAATGATTTTACTCATAGCTCGACTCCACC  |
| 39716737 F 0-24:C>G-24:C>G | TGCAGGAAATACATAAACCGTCAGCATAAAGAATTACAAATGTTACTAAAGCTTTGTAGACAGATCAA    |
| 39718519 F 0-37:C>A-37:C>A | TGCAGTGTGAGATTTTCATCTCTGTGTCATCTTCTCAAATTTGAAGCTATTTTCACGGTGCAGGAAT     |
| 39723252 F 0-21:T>G-21:T>G | TGCAGGATCTGAAAGTTTCAGAAATTTATAGACAGACAAAATTGGGGAGGCTCTTAGGAAGAGATAGCTAC |
| 39724359 F 0-23:T>C-23:T>C | TGCAGTTGGGATGGAGTGGGCTGTGATCCTACCAATGGTCATGTTCTCAAGCTTGATCTTCGAAACTAT   |
| 39725859 F 0-22:T>C-22:T>C | TGCAGATCTATGATCCTATGTATCGGCACATTTACGGTCAACAAACAATGTACCAGTACAACAATCTC    |
| 39724151 F 0-19:A>T-19:A>T | TGCAGTGTATCTCAATCAAATTTTCAGAGATTCTGTTGCACGCTCGCTAAAATATGTCATTTCTATTTCTT |
| 39717471 F 0-53:A>T-53:A>T | TGCAGGTATATTTGTCATTGAGCATATAGTATATCTTGCCACAGTTTTTACCATATAGGCTCTAACTCTT  |
| 39715933 F 0-21:G>A-21:G>A | TGCAGCCCATCGGCCCAATTTGGTGGCCCAAATATTGAAACCTCCGAAATTTCCGTAAGTAAGATTTTA   |
| 39724113 F 0-66:T>C-66:T>C | TGCAGTGCCAAATGAAAGCAACACTTACGAAATTTGGTGGAGTGAACCTCCATCAGGTCATTCTTGTTTGA |
| 46756900 F 0-16:A>T-16:A>T | TGCAGGTTTTTCTTACAATTTCTCCGTTAGTTTCAATCCATTATTGCGTGTTTTTATAATCTCACCCC    |
| 39718181 F 0-6:C>G-6:C>G   | TGCAGTCTGCAAAATCCTATTTCTCAATTGTTCCAATTTTGCTTGAAACAGAAAACACATAAACATAA    |
| 39715617 F 0-28:A>G-28:A>G | TGCAGCAGTAGATAAAACCTTATTAGCAAGGAATGTATGAGATGAAACCTTATTGAAACTCTTTTTTTT   |
| 39715481 F 0-11:A>C-11:A>C | TGCAGCAGAACACAAAACCTTTCAAAACTAAACTAAACAAAAATAAAATAAAATAAAACCCAGAAACAGC  |
| 39716038 F 0-9:T>C-9:T>C   | TGCAGCCTCTACACTGCATTCAACGTAACCTTCTCTCTCCATCTCTATACACCTCCTTTTTTCTGAT     |
| 39728490 F 0-19:A>C-19:A>C | TGCAGTCTAATAACCCAGTAAAAAATAATCATGAAAATCTAAAAAAGAACACTTTAC               |
| 39720144 F 0-12:C>T-12:C>T | TGCAGCTATGGGCTTTTTCTAGTTTTTAC                                           |
| 39719493 F 0-47:C>A-47:C>A | TGCAGACAAAGATCATACTAAGCATATGGAGAGCATCACACTCAAACCGAAGGTTAC               |
| 39715475 F 0-61:G>A-61:G>A | TGCAGCAGAAAAGGCATGAGTTTGACCTCGATTTTACCAAACAAGAGACAGGGAAAGACGTACTCGA     |

|                            |                                                                            |
|----------------------------|----------------------------------------------------------------------------|
| 39719393 F 0-19:A>T-19:A>T | TGCAGAAGATTGAGTATTGATCAAAATTATTAC                                          |
| 39718581 F 0-33:C>T-33:C>T | TGCAGTTATATATTACCGGTGGAAGAAGCTTGGCTTTCAAATCTATATGT<br>TGTATATCCAAGGAGCCTT  |
| 39724461 F 0-48:T>G-48:T>G | TGCAGTTTTTCATTATTGATTTGCTTGAAATGTATATGCATTGAGAAAATA<br>ATCTCTCACCTAACTTTTA |
| 39718496 F 0-49:T>G-49:T>G | TGCAGTGTGATATATGTTATAGTCAAGTTTTTCTGTTATCAATTCAAATTC<br>TTAGTGGATATTGAGAGA  |
| 39719308 F 0-15:T>G-15:T>G | TGCAGAAAGACAGAGTAACAGGCAGTAACATTACCTTTCAATTGATTAC                          |
| 39726857 F 0-12:A>G-12:A>G | TGCAGTTTCACTATGAACACGATACACAAACATGACAGAACCACTGACA<br>TAGTGACACATCATTCTCTA  |
| 39714445 F 0-58:C>G-58:C>G | TGCAGAGATATATATGGAGAGGCAGCTGATAACAAGAAAGATTCTAAAT<br>ATATAACGTCTTAC        |
| 39715445 F 0-56:T>C-56:T>C | TGCAGCACCTCTTAGGGAGACAACATCACAACAACCTAAATTTACTCA<br>ATTTCTTTGGATTTTAGAG    |
| 39724907 F 0-10:G>A-10:G>A | TGCAGCAGCAGCTGGGTTTTGGCCATGGAGTTCAGATCAAAATTCCCATT<br>TTCATTAC             |
| 39725795 F 0-36:C>G-36:C>G | TGCAGAGTCTTGATCTTGGTAGTGGAGTTGGTCTGCGGGAGGTTTCTGT<br>TCATTGTATTTGTTGCTTG   |
| 39722548 F 0-61:C>G-61:C>G | TGCAGCATGCAGACAAAATAAAGTGTAAGAACGAAGAACTTCCCAG<br>GGCTAATGAATACTATTATC     |
| 39724681 F 0-13:G>A-13:G>A | TGCAGAATTTTCATGAAGCCATCCCAATAGTAGAAAGTTCACATGTTAC                          |
| 39725231 F 0-22:T>C-22:T>C | TGCAGTACAACACAATCAGACGTCAAAGACAAGGACAAGACCAGAAAA<br>ATTAC                  |
| 39713616 F 0-25:T>C-25:T>C | TGCAGAAATGGGGAATTGAATTTGATGCAGGGGCCCTGAGTCTACGCTA<br>AAGATTTTCCCTGACATGAT  |
| 39728151 F 0-7:G>T-7:G>T   | TGCAGAAGAATGTTGGTTCAATTCTTGAAAAGCAAGCAAATTTCTTCCAT<br>CTCCAAGCCCATCAACAGA  |
| 39720861 F 0-34:C>T-34:C>T | TGCAGTTGGAGATTTTGTATCAACCAATGAATAACCGACGTTTATATAGA<br>GACTTTAC             |
| 39729149 F 0-21:T>C-21:T>C | TGCAGCAGTGAAATGTAATTTTTAGCAATCTGTGGAAGCATTTATAAGCT<br>TCATAACAATTGTTACAGA  |
| 39718742 F 0-37:G>A-37:G>A | TGCAGTTGCAAAATCAAAATGATATATATGGGCAACAGCAAAGAAGGA<br>AAAAATTCAAAAACATTACAT  |
| 39717250 F 0-20:T>G-20:T>G | TGCAGGGAAGAAAAGAAAAATGCAGGTTTTATCGAAGGGACACATTATA<br>GAGCAGTTTGCAAGCTATTT  |
| 39718166 F 0-8:T>C-8:T>C   | TGCAGTCTTATTATCCTTCGAACACATGACACACCAAGATGGAGATAGA<br>GAGCAATGAGGCATCCTTCG  |
| 39723035 F 0-32:T>C-32:T>C | TGCAGCTTCTGCAAGAATGAAAAAGTAGTTGATTACCAACAATGTCCCC<br>GAATCTAACACCAAATAAAA  |
| 39728452 F 0-42:T>C-42:T>C | TGCAGATACCCTTCATATTAGTTTTACGAATATCGGGTAGATTATATTAC                         |
| 39714490 F 0-41:A>T-41:A>T | TGCAGAGCAGAATATTTTGGCTAAAATGGTGCAAGTGTAACACGATGCG<br>AGGCAAACAACCAATTCATG  |
| 39725627 F 0-10:T>C-10:T>C | TGCAGAATGCTTTCTCACCTCTGAAAACGAATCAAACCCATAAGAACA<br>ACTGTGTTTACTGTTACGA    |
| 39724036 F 0-43:C>T-43:C>T | TGCAGTGAATAAAAAGGTGATTGATGAGGTTTCCATGTCACCTCAGCAA<br>AGCAAGCATCTGTTTTGCGA  |
| 39714011 F 0-10:C>T-10:C>T | TGCAGAATCGCTATTCAAAGAAGGAATCGGCTCTAATTACTCTCGCATT<br>CTCTAGATCTAACTATCAC   |
| 39726824 F 0-9:C>A-9:C>A   | TGCAGTTGGCACGCTTATTCCAATGCTTGAAGGCCTCGGTTGAGCAATA<br>GAGAAAGATGGTTTGCTGG   |
| 39724094 F 0-30:A>T-30:A>T | TGCAGTGCTGATCAGTGATCACTGATCTGCATTCTGAGAAAGCTAGATTT<br>CCAGCTCACATGGACGAAT  |
| 39724920 F 0-18:C>A-18:C>A | TGCAGCAGTTCATTGTGTCAATTTTAC                                                |



|                            |                                                                           |
|----------------------------|---------------------------------------------------------------------------|
| 39725465 F 0-26:A>T-26:A>T | TGCAGAGGGAACATGAATCAGAATGTATGTCTAGTAGAGTCAAACAGAA<br>GAAAATTACTAGGTGATAGA |
| 39724413 F 0-21:T>C-21:T>C | TGCAGTTTCCCCATTCTCTGCTGCACTTCTCCTTTTTGGCTTTACCTCCATT<br>ATCAAGATCAACTCTGC |
| 39725145 F 0-24:G>A-24:G>A | TGCAGGGGGCAAAAATACACAAAAGGGTTTTAC                                         |
| 39724291 F 0-22:C>A-22:C>A | TGCAGTTCTGCTTGTCTTTGTCTGACGTTGGGGGAAAGGTAAAAATGA<br>TAATCATCTCCACTCTCA    |
| 39727711 F 0-54:T>A-54:T>A | TGCAGGCCTGTATTTAGAATATGCAATGAATGAGTTTCAAAGTTTTCG<br>ACCCTTGTAACCTCAGTAAG  |
| 39714371 F 0-20:A>G-20:A>G | TGCAGAGAATCCCACATATCATCATTACATTCTCAATGCCCTAAAACAG<br>AGCCCTTGTTTTATATGAG  |
| 39714958 F 0-50:T>G-50:T>G | TGCAGATGACTTCTGAGGTGATGCGACATCTGTTCCAGAAAACCTGTCA<br>TTCAGAAAATTGTAGTCTC  |
| 39716685 F 0-18:A>C-18:A>C | TGCAGCTTTTCCCATCTCAAAGAGATGGAAGGATAATGGAAGAAAGAAT<br>AATAAGCAATTAGTAAAAGG |
| 39725089 F 0-45:T>C-45:T>C | TGCAGGATGAATTGTTCAATCTTATTGTAAATTTGTGGCAACATTTCTTT<br>AC                  |
| 39714676 F 0-52:G>A-52:G>A | TGCAGAGTGAGTTCAATTTAGAGTCAGCTTCTTTGCTTTTTCCACATAATT<br>TGAATAAAAACCAAAA   |
| 39713465 F 0-13:A>T-13:A>T | TGCAGAAAATGGAATGCGCCTTTGCAGAGAAGGCAAGTTGAATTGAACA<br>GAGGAGAGGAGAGGTGAGAG |
| 39722072 F 0-64:T>A-64:T>A | TGCAGATGATCTTGCAGCACCGAGGAGTCAGGCGATGGTGCAGTACCCA<br>TAATGGCAACTGCTATAACA |
| 39715576 F 0-66:G>A-66:G>A | TGCAGCAGCTGCCACAAAGCTCTCCAGCTGAGACATCATAACCAACCCG<br>ATAACGGCAGCAACAGCGCA |
| 39717722 F 0-13:C>T-13:C>T | TGCAGTAAAGTGTCCAGCAGGTCAACAATTATGCAAGCATAAAGCTATA<br>ACATTCATAACTTATAAATT |
| 39713439 F 0-25:C>G-25:C>G | TGCAGAAAAGGAGACCTAACAACAACAAGAAGAAGCATCTGCATTTCTT<br>CTAATCTTCATTGCTGAAGA |
| 39722395 F 0-13:G>A-13:G>A | TGCAGCAGAATCTGTAGTCAATTGTGCTTTTTTATTTGAATCATTCAAAT<br>GCTACAATCTAGATTTGAG |
| 39713828 F 0-27:A>G-27:A>G | TGCAGAAGCAATTTGGCTGCCTTCAAGATCCCAAAGAAGGTCTTCTCAC<br>AGATTCATTGCCCAAGACT  |
| 39727350 F 0-65:T>A-65:T>A | TGCAGAACAGACATTTGCAGAATCTTATTTTATGTTATTTGTTTATTATT<br>TACTTTTCTTTTTTTACA  |
| 39722738 F 0-25:G>T-25:G>T | TGCAGCCTGCAACTCTCTCTAGTAAGGCCTCACATCTCTACTATTTTCAT<br>ATTTTATATTCTCATCATA |
| 39720081 F 0-46:C>T-46:C>T | TGCAGCCTTCTTTCAAGGGAAAAATGTATTTGTATTATTGTATGTTCTTT<br>GAAATTTAC           |
| 39718030 F 0-7:G>A-7:G>A   | TGCAGTCGCCATTGTTATAGTTTCAATTCTTGAATTCTATGGTGGAGAG<br>GTTGCCTTGGACGAAAAAG  |
| 39715324 F 0-44:A>T-44:A>T | TGCAGCAAGACCGAGCAGCCGGTCATTTGTTCCGATTGCCTGAAATCTG<br>ACTCCGGAAGCCAGACCGCC |
| 39727513 F 0-14:T>A-14:T>A | TGCAGCAAATTGACTACTTTCAAGTTTGTAGACCAAACACAAATTTGAT<br>ATTTGAGAAGTTTTACACA  |
| 39717952 F 0-56:G>A-56:G>A | TGCAGTATGGAGAGACCCATTGCATATGGCAGCAAAGAATGGGTGCAA<br>TGATACAGCGTCGGCACTAC  |
| 39717355 F 0-49:G>A-49:G>A | TGCAGGGGTAAAGAGATTCTAATAAAACTTGTGGCACAAGCAATCTCTA<br>GTTGTACAATGTATTGTTTC |
| 39723231 F 0-63:C>G-63:C>G | TGCAGGAGTTCATGTAGAGTCTGATGCCATCTAGTAGTGAAGCTTTTGA<br>CGTTCAAAGATCACGATTT  |
| 39727642 F 0-16:A>T-16:A>T | TGCAGCTGTTGGAGGGATGATCAAATAGGATGGAACCAACTCTTTTCA<br>ATTTTCAACCACCTTTTTGT  |
| 39715234 F 0-54:C>G-54:C>G | TGCAGCAAATCAAAGCACAATCAAACCGAAGAACAACAACAACAAAC<br>TCAAACAATAATCCAATCGG   |
| 39725423 F 0-21:C>G-21:C>G | TGCAGTTTTGCTTGCCTTTGTCTTGCACCTTGGTGAAAGGTCAAATTA<br>CTGATTAC              |

|                            |                                                                            |
|----------------------------|----------------------------------------------------------------------------|
| 39714808 F 0-10:T>C-10:T>C | TGCAGATATATCTTTATTCTTCAATGAATGTAAATTCAAGAAATAATGAA<br>AAGCATTTAGCCAGTTGTT  |
| 39717869 F 0-31:G>A-31:G>A | TGCAGTAGACCATCCCAGATGGTGCCTACAGGGAGTTGCATTCAGTTTCC<br>TTGCCTTGAGCATAAGTTA  |
| 39718386 F 0-8:A>T-8:A>T   | TGCAGTGGACACGGGAGGTGTCTTTCTAATGGACTTTGTGAATGTGGAA<br>ATGGTTACACTGGCATCGAT  |
| 39720209 F 0-50:A>G-50:A>G | TGCAGCTGTGAATGATAATTAGTTGTGTTTTTTTTGTGTGTAGGAAGTCAG<br>AATTTTGTAC          |
| 39728720 F 0-11:G>A-11:G>A | TGCAGATGGTAGATATAGTAAGAAAAACACTGGTGGGTTGACTAAACTC<br>TTTAGTTTTATTTTCTTACA  |
| 39714960 F 0-36:A>G-36:A>G | TGCAGATGAGGTTTTCTTTTTTACATTTCAAATTCAAAGTTGAATGTTTT<br>GCATAACATGGAGTTGGA   |
| 39717330 F 0-67:C>A-67:C>A | TGCAGGGGAGAAGTCCAAGAAAGAACGGTTGGCTGTTCTAAATATAACA<br>ACTTATTGTATCCTAAGTCA  |
| 39718377 F 0-43:G>T-43:G>T | TGCAGTGCTTGCAGTAGATGGGATATGAATATGGATGCATATAGATTGG<br>CACCAGAGCTTGCCGAGGTG  |
| 39725193 F 0-32:C>T-32:C>T | TGCAGGTGTGTGAGAATTGGCGTTTTGTGAATCCTTTAGCTCTGAGATTTT<br>GGTTAC              |
| 39726984 F 0-32:C>A-32:C>A | TGCAGACTAGAAAGATTTTCTGACGATGAAATCATTAC                                     |
| 39727153 F 0-7:C>T-7:C>T   | TGCAGGCCGAGAGAGGGACCAATTCTTGAACCTTTCTTTTACCTTATTAT<br>CAGTGTAC             |
| 39713325 F 0-59:T>C-59:T>C | TGCAGCAACCGCAAATGTTTCAGAAATACTCGGGATTCTGTTGTGAGTA<br>GTAGTACGTGTGCATATACC  |
| 39723391 F 0-32:G>A-32:G>A | TGCAGGCTCAGATGGACCAACTATCTTAGGCCGGGCATCAAGAGGGGTA<br>ATTTCACTTACCATGAAGAG  |
| 39714605 F 0-21:A>G-21:A>G | TGCAGAGGGTATGGGCTGCGTACAAAAAGAAGATGCTTGGGTCTAATCC<br>AAGTAAGCCCTAATTCCATT  |
| 39724633 F 0-31:G>A-31:G>A | TGCAGAACTTATGATATGAATGAAAAAAGATGTATTAC                                     |
| 39725300 F 0-25:T>G-25:T>G | TGCAGTGACTTTGCAAATATACTTGTTTTTGACTATGAACATTAC                              |
| 39728293 F 0-36:G>A-36:G>A | TGCAGCTGCCATAATATCTCTATGATGTTCTCCGATGACAGTTAGTCTAT<br>TGGCCTTCGAGATTTTTAC  |
| 39726600 F 0-56:G>A-56:G>A | TGCAGTACTTCTACTTTCGTTTGCTTCTGTACAACTCCATCGCCCTCGAT<br>CCACCGAAAAACACGGTC   |
| 39713293 F 0-50:C>A-50:C>A | TGCAGTACAGCACTCCCTCAAAGGAGCAATAGTTGCTAAGCTGCAAAAG<br>ACAAAAAAGATACAAATCCA  |
| 39715821 F 0-10:A>T-10:A>T | TGCAGCCAAGAATTGTACAGTTTTTTTTACCGTCTCCATTAGAAAACCTCC<br>TGATCCAAAAATCAGACTT |
| 39717352 F 0-9:T>A-9:T>A   | TGCAGGGGGTGGGTTTACCTGCCTATATGTCAAAAAGTTTTTGTATTGC<br>ATCTTTATCCCACATTTCC   |
| 39727482 F 0-5:T>A-5:T>A   | TGCAGTTCTAGGAGAAAAAAATCTTCTAGTGGAGATAATTTGGAATC<br>TACAACACCCGGTGCTTTTC    |
| 39721759 F 0-15:G>A-15:G>A | TGCAGAGATATGTTGGCATCTACTTGTCTATTTGAACGACTGCTTGAAC<br>TTCCATCTCCATTTTGTTC   |
| 39722108 F 0-37:C>T-37:C>T | TGCAGATGGCAGATATTTGACTATATTGGACTAATATCGTTAGGATGTCA<br>TCTGCCTATAACTAAAAAT  |
| 39718130 F 0-28:A>C-28:A>C | TGCAGTCGATGTTTTATTGATTATTTACTATGTTATTGGTGAATCAACA<br>TGGTATGGTATTTTCAAC    |
| 39718966 F 0-44:T>G-44:T>G | TGCAGTTTTGATTGAATTGATTGGTGAACCCATTTTTGAAGGGTTTCGA<br>CATTGTTGTGGAGGCTCGA   |
| 39724566 F 0-18:C>A-18:C>A | TGCAGAAAACTAAAGCACAACTACCCATGTTAC                                          |
| 39716358 F 0-45:A>G-45:A>G | TGCAGCTCGTGGATAGCTCGTGGATGGGTTCTATTCATTCCAATCATTGT<br>AGATCGGGATTGTCCGAAC  |
| 39715750 F 0-58:C>T-58:C>T | TGCAGCATTACTGTCTTGAGTAGCACATTTCTTTTTATTTGATTTAGCAA<br>TTTGAACCAGATGGTTCC   |

|                            |                                                                        |
|----------------------------|------------------------------------------------------------------------|
| 39720066 F 0-13:A>G-13:A>G | TGCAGCCTATAAAAATCTCAATCATATTAC                                         |
| 39724236 F 0-9:A>T-9:A>T   | TGCAGTTCAAGGGAAAATGTAGGAATCAATACGTTCGGTTTCGGTATTTTTCTCGTTCTTATAGCGGTTT |
| 39728736 F 0-5:C>T-5:C>T   | TGCAGCGGTCTTTGTCTCTGTCTTCTCTTATCCCCCCTTATACTTTTCTGTTGATGTGGATGTTACA    |
| 39714844 F 0-33:T>C-33:T>C | TGCAGATATTTGGGCTCTTGGCTGCGTGGTATCTGAGATGTTGACTGGAA CCCAGGTTTTTCTAGATAC |
| 39716542 F 0-8:A>C-8:A>C   | TGCAGCTTATTGTTTTTCATTAGGGATTTTGTGTTGTTCAAGAAGATATAGTGAAAGAAAAAGACCCTA  |
| 39723777 F 0-17:T>C-17:T>C | TGCAGTACAAATAACAATATAGCTAGTTCGTATTGATTTGTAATCCCTTATCGGATGTTTTTCAATAT   |
| 39714151 F 0-6:C>A-6:C>A   | TGCAGACAGAAGGGATTTGTGATCAGGTGAAGAAAGAATATCAGATGCATCATAATATATTGATTGAT   |
| 39725087 F 0-28:C>T-28:C>T | TGCAGGATCACTTTCCTGATGCTTCTTTCATGGTGTGTTTAC                             |
| 39717385 F 0-36:A>G-36:A>G | TGCAGGGTCCAGTGCTTCAGCCTGCGCCCGAGTCCTAGTGGGAACAAAGTCTTCAAATCGTACGGCCAA  |
| 39713533 F 0-47:C>T-47:C>T | TGCAGAAAAGAGGCCTGGAGATGCCGGGGGTTTCGACGCCGGGTGGAACACGGCGAAGTTTTTCCGATGA |
| 39722939 F 0-5:C>T-5:C>T   | TGCAGCTGAATTTTGTAAAGCTGCTTCTAGGAAGGGGCTGGTTGAGCTGTTTTAGAAACTGTTTTTTT   |
| 39725909 F 0-9:A>G-9:A>G   | TGCAGATTCAGTTTCCAAGAATCAGTTTCTTGATACTAAAGCTCCAATGTGCAAAACTAAGGGCAAA    |
| 39716193 F 0-12:A>G-12:A>G | TGCAGCGGTGGAAGCCAACGAGGTCAAACCTCCAGCCGGTGTGATCGGATTTGAAAGCGGTTGGTTCT   |
| 39722353 F 0-27:T>C-27:T>C | TGCAGCACCATGCGACCCAAATTTCTCTCCTTTTGAACAAATCGTTTTCA AATCACAACCTCTAGAACC |
| 39718963 F 0-56:C>G-56:C>G | TGCAGTTTTGAATCTTCTCTTTGCTGAGGAGCTTCAGCATTGTCTCTGTGAAGCTCAGAGTTTCTGTT   |
| 39726943 F 0-49:A>G-49:A>G | TGCAGAAATCTTGACGATCTTCATTCTGATAGAATATCCAAACTACTCACTACTTAC              |
| 39716973 F 0-25:T>A-25:T>A | TGCAGGATCATCTTGGCCAGTGAGTCAAGCAAAGCTTGCACGTGGTACAAGCCCGCCGTCAGCTCATG   |
| 39720161 F 0-20:T>A-20:T>A | TGCAGCTCATTTTTCTTGTGTTTGCATGAAGATAATTTAC                               |
| 39720207 F 0-18:C>T-18:C>T | TGCAGCTGTCAAGGATTGCAAGGATTTTTTAC                                       |
| 39727275 F 0-33:A>T-33:A>T | TGCAGTTTACAAGTTCGTAAACTTGAAGAAAAAATTTTCGATATCAGCCGATGATGTATTAC         |
| 39724628 F 0-6:A>G-6:A>G   | TGCAGAACCCGGCTACGTGTACCATTGTCACGTAAGTAGCAAGTTAC                        |
| 39723094 F 0-29:T>C-29:T>C | TGCAGCTTTTTCTGTACGAAATCGAAATCGGTTTATGCTCGTTTGGTACGTTTTTCGTTTTGTTTTT    |
| 39714583 F 0-20:C>A-20:C>A | TGCAGAGGCTCTAGTAACGTCTTTCCTCTTTTATTCTAGCAATGACGTATAATCACTGACGGAAATAGT  |
| 39714792 F 0-60:T>A-60:T>A | TGCAGATAGGAAACCTCCGGGTGTAGGGCGTGAAGAGGAAGAGGGCGTGAGGATGGTCCTGGTGAAG    |
| 39713983 F 0-36:A>G-36:A>G | TGCAGAATATCTTACATGAACTACCAATGCTAATGCAATTTTTGTGTGAA CAAATAGAGCCATTTAGAG |
| 39715067 F 0-21:G>T-21:G>T | TGCAGATGTTTTGATCAGATTGCATCAACTACAAAGAATATCAATTTTCA AATTTTTATTCAACTAACT |
| 39718600 F 0-20:C>A-20:C>A | TGCAGTTCAAAAATAAAGTCTCTGGTGAAGAAATAAATCACAAACTA TCTCGTTTAGCACAGGAAT    |
| 39722349 F 0-20:G>A-20:G>A | TGCAGCACCAGATCCATCAGGAACCAACAATTCATATAATGGCTCAAC TGTTCCGCATAATTTCAATC  |
| 39716619 F 0-63:A>G-63:A>G | TGCAGCTTGAAATTGTAATTGGCCACCAATTCAGAATGGAATTTCCAT AATCTGGCCAACAATCAAT   |

|                            |                                                                         |
|----------------------------|-------------------------------------------------------------------------|
| 39722950 F 0-27:C>A-27:C>A | TGCAGCTGATTTCCATACATATTCAATCATGTGGTCTCATTGGCAAATCATGTAAGTAAGGAAAAAGAT   |
| 39717596 F 0-52:C>T-52:C>T | TGCAGGTTAGGTCCCATCCTGCTATTATCCATTCAATTTGAAATACTGAGTTCGAAAAAGAAAGTAGCC   |
| 39723751 F 0-36:A>G-36:A>G | TGCAGTAAGCAAGAATGTACGTTCTGCATCAATAACAGGGGGTTATTTCTATCGATCTAAGACCGATCC   |
| 39718960 F 0-64:T>C-64:T>C | TGCAGTTTTCTTTATTGGCTTCTAAACATGGTGGTGGTTTTAGGCTTGGCACTGACACCGCCAGTGTTA   |
| 39729214 F 0-62:T>A-62:T>A | TGCAGTAGCTAAAGTTTTGGTTGTATGTTAGCCACAAATATTTTCAAGTTATAAACCTTATTTAC       |
| 39713531 F 0-15:A>G-15:A>G | TGCAGAAAAGAGAGAGAGAGAGAAGGGTACGTATGCAAATTGTTTTGAAAACAAGAAGAGAGAAAAG     |
| 39719385 F 0-15:C>T-15:C>T | TGCAGAAGAGAAAATACGATGAGTGTTCATTTACGTACACGTTAC                           |
| 39721128 F 0-24:T>C-24:T>C | TGCAGAAAACATCTGGCATCACAGTTAGTCTTTTTCTTTTTCCCTTATCAAATTTCTTTTTGATTTGA    |
| 39721802 F 0-17:A>C-17:A>C | TGCAGAGCCGAAATCGAAACTTCCCTCTCCTCTCCGTCTCTCTTCATCAAATTCAACGGAAGATTTGAA   |
| 39719962 F 0-53:G>A-53:G>A | TGCAGCAGCTTGTTTTTCGAATCCAGGGCCCCCTAAATCTGTAGTAGGCTTTCGTTAC              |
| 39721971 F 0-29:T>C-29:T>C | TGCAGATAGTTTTGGCCATCAAACTGTATGATAAATTCCAACAGGAACATACATACAGGGACGTAAAA    |
| 39715870 F 0-13:C>T-13:C>T | TGCAGCCAGCAGGCTACCTTCCAACCTCGTTCCAACACTTTGAAAGGTCCCAAAATAAATTAGGGCAAGC  |
| 39719433 F 0-11:A>T-11:A>T | TGCAGAAGTTCAGCCTGCTTTACTCGAGTTTCTTGTTAC                                 |
| 39714373 F 0-21:C>T-21:C>T | TGCAGAGAATCGAGAGAGATTCTGTGGGAGAAAGAAAAATGAAGGAAAACGACTTGGAAGAATTGGG     |
| 39714940 F 0-27:G>A-27:G>A | TGCAGATGAAAATGGAATTTCCCTGTGGACTTGACCCCTGATCTGTTATGTCGACCGTGGAAGGTGC     |
| 39717704 F 0-55:G>A-55:G>A | TGCAGTAAAACGGCTCACCTAGGAGAGACATGTTTCAGTATTCTTCTGATTGTCAGGGCAAATTATTTTCG |
| 39725205 F 0-16:A>G-16:A>G | TGCAGTTTTCAAAGAACAATCCCACTGTTCTAACATCAATGCGAAGCTAGATTAC                 |
| 39725212 F 0-29:C>T-29:C>T | TGCAGTAAAAAATTATGCACATAATACCCATTTTCATCTAATGTAAGTTAC                     |
| 39715190 F 0-19:T>C-19:T>C | TGCAGATTTGACAGGACTCTATAGGAGAAAACCTCCTCGACCTGAATTCTGACATAATAAAAAAATTAC   |
| 39719922 F 0-49:T>G-49:T>G | TGCAGCACCTGTATCAAAAAGAACAAGGATGAAGAAAAACAATTCAGTATATTAC                 |
| 39725239 F 0-33:A>T-33:A>T | TGCAGTACCAATAACAGGTCATTTTCATAAATGTACAAGTATTGAAATCGTTAC                  |
| 39717829 F 0-8:A>T-8:A>T   | TGCAGTACATTTATTAGTGCAATAGGATAAAGATCTTTATATACTGTGTTCTTCCATTCCATCTACT     |
| 39728591 F 0-9:T>C-9:T>C   | TGCAGGATATCTTTCTGAGTTGGATCAATCACCATCAGCTTCAATTTTGGAGTCAATGCAACCTTTTAT   |
| 39721154 F 0-7:A>G-7:A>G   | TGCAGAAAATTTTGTATGCCACTCATTGCCAATTAGACGATTTGTTCTATGTCATTTGCAAATAGCAAT   |
| 39714815 F 0-55:C>T-55:C>T | TGCAGATATCATAAATGGCCTCATTGTCAAGGAGCACAGCGACATCAGTGTGTTCCAAGAGGGGAGTGGG  |
| 39718348 F 0-6:G>A-6:G>A   | TGCAGTGCCATTGCAAGTGATTTTGGGGGAGCACCATTTGGGTAAGCATTTTTACTCATATCATTTTC    |
| 39717411 F 0-15:G>A-15:G>A | TGCAGGGTTTGAGAAGCTCTTTTTTGCATCCCTAAAGTATATCAACTGAAAACAAAAAACCATATATGAA  |
| 39717972 F 0-62:C>T-62:C>T | TGCAGTATTCGGATTCGGGTGAGGCTAAGGCTCACGTTCTACACTTCCCTACGAAAGAACACCGGTGGA   |
| 39729035 F 0-56:G>A-56:G>A | TGCAGTGCCCTTAGAGAAGGGTAGGGTGACCTTGAAATGTCCCTTACATATATTGTTGCCTTACAGA     |

|                            |                                                                         |
|----------------------------|-------------------------------------------------------------------------|
| 39718715 F 0-67:A>G-67:A>G | TGCAGTTGAATAAGTATGATTACGAGTTGGAAAACATTGTTTTTGATAAGAAACCACGCTTTCATTGAG   |
| 39716025 F 0-67:T>A-67:T>A | TGCAGCCTACGTCATGATATAAGAAACGTGATCATAATTTATTATACGATATAATAGTTAGTAGATATA   |
| 39726937 F 0-27:A>G-27:A>G | TGCAGAAACCCAATGGAGAAGAAGGAGAGAAAGGGAGAGGAGAGAGGATTTATGTTAC              |
| 39714731 F 0-59:T>C-59:T>C | TGCAGATAAATGGCTCGGAACAGACGTAATCTCAATCCTTGGTTCCTCGCTTCTCTACTAAGGGACAG    |
| 39713594 F 0-60:G>A-60:G>A | TGCAGAAATCACAAAGGTAGCTTTTAGAGATGGTTAGCAGTAACATATA T TACTTAGCTAGTAAGTAGC |
| 39726752 F 0-29:T>C-29:T>C | TGCAGTGGTACTTTTTAGGTTATTTCTGCTGGACCCATTCATGTAATTGTG TTCATGAAAGCTGAATTG  |
| 39729125 F 0-41:G>T-41:G>T | TGCAGGGACGGTGGCCTGGTGGAAATCCACTCCACTTCCTCAGAAGATCA TTTTTCTTTAC          |
| 39722693 F 0-10:A>G-10:A>G | TGCAGCCGGAAGAGTCGAGGCGGCGGCAGAGAGGGGAGGAGCAGGGGATTTGGGCAAAGGATTTAGATT   |
| 39724571 F 0-21:A>T-21:A>T | TGCAGAAAAATATAATCAGTTATTTGAAGTTTGAACCTCAACAAAATTAT ACCTTAC              |
| 39722739 F 0-33:T>C-33:T>C | TGCAGCCTGCACCGTTGTTCTATTGAAAGAAAATGCATCATTCTAATGCT TTCGTGCCTCTCTCTGTTT  |
| 39724604 F 0-33:A>C-33:A>C | TGCAGAAATCAAGATAACTCGCTTAGTGAGGGCAGAAACTTAC                             |
| 39713604 F 0-33:T>G-33:T>G | TGCAGAAATCTGACTGATTCTCATATGGCTCATTCAATTATTCATGTCAGT GTTCACGGTTGTCGGTTAC |
| 39721909 F 0-37:G>A-37:G>A | TGCAGAGTCTACCTGCAAGCCACCCATTGCCGTTGCCGCTTTTTACGCAC AGAACAGAAGCCATAGCTT  |
| 39726061 F 0-33:G>A-33:G>A | TGCAGCAGCTGCTAGAGTTGGAAAACACTTGTGGGCGATTGTTTCAGAAA TGTTTGTACATCTTTTGCT  |
| 39719872 F 0-16:C>A-16:C>A | TGCAGCAAGACAGGTACGACTTCTGTTCTGTTCTGATACCATATTAC                         |
| 39716029 F 0-16:G>C-16:G>C | TGCAGCCTCAAAGGATGAACTCGATAGGAGAAAGCTTCGAAGGGGCT AATGCCACTAGACCAAACAA    |
| 39721970 F 0-66:C>T-66:C>T | TGCAGATAGTGAGTTTCTTTGAGTCATACTCAAAGTCAAATTAGCAGATT AGGTGTGAAAAATACTCGA  |
| 39724777 F 0-9:C>A-9:C>A   | TGCAGATAACCCAAAAAAGATCAAGGTTTAC                                         |
| 39714038 F 0-67:C>A-67:C>A | TGCAGAATGCAGTTGCCATTCCCATTCAAACCGCATTCCCTACAAGCTATA ACTTCTAGCTTCCCTCCC  |
| 39713600 F 0-20:T>C-20:T>C | TGCAGAAATCCACAGTTATCTCCTCAACAAAATAAGATATGTCACAGTT GTACAGAAGTAATGTTTCTT  |
| 39725219 F 0-6:G>A-6:G>A   | TGCAGTGAATAGATTTTTCTTGGAAATTGATTAGAGTTTGTGTTGATTAC                      |
| 39718221 F 0-54:T>G-54:T>G | TGCAGTCTTTGAGAATGGCCCTGAAAAATAAAAGGTAATATTTCAATTGA TCAATTTCTTTTTTTGTTT  |
| 39718169 F 0-30:A>G-30:A>G | TGCAGTCTCCGTTCTCCATATGAGTTCATGAATCTCTGGTTTATATATAG AATTGTTTGCAGATGGATG  |
| 39718723 F 0-10:A>G-10:A>G | TGCAGTTGAGAATTTGTCCAGCATAACTTAGTGGTTTGTCCCGTAAGAAT AGTACATGCAAGCTGGTCC  |
| 39717186 F 0-15:C>A-15:C>A | TGCAGGCTATTATGCCCTAACTATACAAAAGAGAACAAGATGGAGTTTCA AATCATCTGTTCTTACATA  |
| 39717733 F 0-45:G>C-45:G>C | TGCAGTAAATTGAATTGATTTGAATGTGAATGTCTCTATTGAGTGGAACG TTTACTTTTCAGTTTTTTTT |
| 39723461 F 0-19:G>T-19:G>T | TGCAGGGATGGTGATTTTTGTGTAACCTCCATTTCTTCTTCATACAAAA TCAAAGGCAGCGAGAAAAC   |
| 39716586 F 0-62:G>T-62:G>T | TGCAGCTTCGTCCAGGTAAATTGATCCATTGATAGCCTTGCTTATTGCTG AATTTTCTGGGGTTTTTT   |
| 39718661 F 0-29:G>A-29:G>A | TGCAGTTCGTGATCGTTGCTGAATACCATGTACATATTTCTTTATTTCTA AACTCGTCTGAACTAACC   |

|                            |                                                                             |
|----------------------------|-----------------------------------------------------------------------------|
| 39713385 F 0-37:G>A-37:G>A | TGCAGAAAAAACTTCAAAAAGAAAACCTCAAATTTCTCGAAAGAAGTTTT<br>TCAGCTAAGAGAAAAGAAAAA |
| 39713910 F 0-28:C>G-28:C>G | TGCAGAAGGTTGTTGTTGTTGTTGCCGCCGCCACCGCCGCCGTTGTTTGA<br>CTGATGGGTCATCGCCGAT   |
| 39714443 F 0-28:A>T-28:A>T | TGCAGAGATAGGTAAGAAAATAAGTACCATTATGAATTTTGATCCACAG<br>CATTATAGTTTGTGGTTCT    |
| 39715641 F 0-50:T>C-50:T>C | TGCAGCAGTTGGGTGAGAGCGCTGATTCAGGATAACGTCTTTGAGGATA<br>ATGTCTTTGAACGATGTTG    |
| 39713699 F 0-43:T>C-43:T>C | TGCAGAACCACTATTTGGACCAGCAGATCAGTAAGTGTTTTCTTAGACAT<br>TTCCTTTATGTTTCGTTGTA  |
| 39716277 F 0-48:C>A-48:C>A | TGCAGCTAGGATTGAGCGGCCAGACAAAGACAACAAAGAGTAATAGTA<br>CTAATAAAGAGAGTTGGAGTA   |
| 39717988 F 0-56:G>T-56:G>T | TGCAGTATTTTCCTTCATCCTACCTTTTCCTGTCCCAGACATTGTAGATTCCG<br>ACTTTGCCAGGGGTTGCT |
| 39715498 F 0-8:A>G-8:A>G   | TGCAGCAGAGAAAAGTCAATTCAGAGAGACACGATTCCAAAAGCTTGAAC<br>GACATTTAGTTACTTGTGCC  |
| 39715664 F 0-19:G>T-19:G>T | TGCAGCATAGCAGGCACTTGTAGGTAGCAGCTCTAAAATTTCTTTCAGTA<br>AATCATAACTTGATAGGCA   |
| 39722901 F 0-20:C>T-20:C>T | TGCAGCTCCACTACTAGGCTCGAAAGGGTGTGCGAGGTTGCACACCGGGA<br>GAACCATTGAAGTGAATTA   |
| 39723767 F 0-25:G>A-25:G>A | TGCAGTAATGTTCTAAATCTGAAACGACAATCATTGCTAGTTTATATATC<br>AGCTGACACTTATCTGACC   |
| 39713976 F 0-23:T>C-23:T>C | TGCAGAATATACTATTTGGCATCTGTATTTGAAAATCACTCCCAAACCCA<br>TGACAAAACCACCATAGAC   |
| 39715441 F 0-8:T>C-8:T>C   | TGCAGCACTCATGGATGTTTGCATTTCCAGCCTCCATTCATGATTTCCA<br>GCGATTTGCAATGTGAGA     |
| 39720813 F 0-8:T>G-8:T>G   | TGCAGTTATGCGGCTAGCTTTCAATTTTCACATTTAC                                       |
| 39718501 F 0-45:G>A-45:G>A | TGCAGTGTGGTGGACTCACCTTTGGAACAACCTCATGACTTACCGGGATGT<br>TTCAATAGGTACTACTGCCT |
| 39723547 F 0-58:A>C-58:A>C | TGCAGGTAAGTCTTTTGGTCAAGTACGCTAAAATTGTAGACATGTTACAT<br>TTTTTTTTATAGCTTCCAA   |
| 39715165 F 0-56:C>T-56:C>T | TGCAGATTTAGCAAAGATTACTCCCAAGATTTTCTCTCTGCAACAAAGC<br>TTCTATCCAAGGAAGCCAT    |
| 39718253 F 0-57:A>G-57:A>G | TGCAGTGAAGTCTATAGTTTCTTTGTACTTTTTTCCCCTTTTTTTAGACTG<br>AAAATTATTATTGTCTTT   |
| 39714835 F 0-5:A>T-5:A>T   | TGCAGATATTCATGCATTTTCAGCAGCCTAATCTTTGTCATCACAAGATC<br>TACAAAATTTCAATGAAGA   |
| 39724562 F 0-14:G>A-14:G>A | TGCAGAAAAAAGAAGAAAGATCCCACAAATTCTTAC                                        |
| 39717116 F 0-19:A>T-19:A>T | TGCAGGCCAGGACGGTAGTACTCGAAATTCACGACGTCGTCGTGGTTTCG<br>AATAGTGGGACTGAATCAA   |
| 39726698 F 0-54:T>C-54:T>C | TGCAGTGAAAAAATGGTAAAACAACATTTTTTTGTTTTTTGTTTTGTGTTT<br>TTTTTGGTTGAAATGCAC   |
| 39714228 F 0-7:T>C-7:T>C   | TGCAGACTTTTCGGTATTTGCAGACTCCTCCAACCTTGGCTTTCATCATAA<br>ACATAACAACACTCAATAA  |
| 39715402 F 0-49:G>C-49:G>C | TGCAGCAATTTTTCGGAAAAGTGCCTGCAAAGGGAAGGGTTGGCCATTA<br>GAAAGACCGTAAAAGAATAC   |
| 39724625 F 0-42:T>C-42:T>C | TGCAGAACCCAACCTGGATGGAGGACTGACATTTGACACATTTAGGTCA<br>CGACTTAC               |
| 46754244 F 0-22:T>A-22:T>A | TGCAGACTGAGCAATCCATATATCTCTCTCTGTAGCTTCTCTTCTTCAA<br>AGATAAACCCAAAAAAA      |
| 39715532 F 0-36:A>G-36:A>G | TGCAGCAGCAACCGATGTCATTGCCTGAGACTCTTCAGCAGTCCATATAT<br>TTTTCAGAAGCTCATCCAT   |
| 39717315 F 0-24:A>G-24:A>G | TGCAGGGCGGCGCTGCCGATTTCCAAGAGAGTGAAGGATTTGATCGGAC<br>GGCTGACATTGCAAGAGAAG   |
| 39724881 F 0-33:C>A-33:C>A | TGCAGCAAGTCTTGCTCGTGTGAAGACTGCTTGCTACGTTTCGTTACCAC<br>TTTTAC                |

|                            |                                                                             |
|----------------------------|-----------------------------------------------------------------------------|
| 39729152 F 0-12:T>A-12:T>A | TGCAGCTTGAGCTGCTGGGTGAATATCCCTTGCTATTGAATCTGCTCCAGTTATCTCATCTATAGAAGA       |
| 39721411 F 0-56:C>T-56:C>T | TGCAGAAGGTAAGCTGCTATAATACACTGTTATATTGTTATTGTAAAGGA<br>GAAAATCAGAAAACAAGTA   |
| 39719436 F 0-34:G>C-34:G>C | TGCAGAAGTTGGGAATTCATCTAATTCTGCTTGGGATTTGAGTCTTTGAC<br>GCAATCTTAC            |
| 39718927 F 0-64:G>A-64:G>A | TGCAGTTTGTCACTACCATGCATATGATTACAATTATTTGAAGCAAACAT<br>CTAAATTTATGACGGTGGG   |
| 39716505 F 0-6:T>A-6:T>A   | TGCAGCTGTGCTGGCTGTGTGGGTTCCGTGTCCATGGATGTCTCGTGCGG<br>ATAACCAATCGTTGGCTAG   |
| 39721166 F 0-64:C>T-64:C>T | TGCAGAAACAGGAACATATAGATGGATGGCTCCAGAGGTGCTTTTTCTTT<br>TTCTTTTTCTTTTTCTTTT   |
| 39725641 F 0-10:T>C-10:T>C | TGCAGAATTGTGTATGCTTTTGTTCATTTTTGTTTTGGTTTAGGGAAAGGG<br>AATTAGAGGATACAGTTA   |
| 39720297 F 0-37:T>G-37:T>G | TGCAGGAATTCTCGAACCTGGAGGCATCACTATCAGTACTCCCGTTTGT<br>ATTTGTTAC              |
| 39716516 F 0-23:G>A-23:G>A | TGCAGCTGTTGGTTGTGATTCCGGCGAGGGAGCAGTGTAGGCGCGGGCT<br>AGTGCAATTTGGGTTGGTTT   |
| 39718194 F 0-41:A>C-41:A>C | TGCAGTCTGTGACTTTGAGTGATACATCTTCTTTGGTGGTGTATGAAATCA<br>TAAATCTGTCTTCTGCA    |
| 39718222 F 0-68:T>C-68:T>C | TGCAGTCTTTGCTTCAGAAAAAAAAAATCCCACTTTTTTTGTGCAATGAT<br>AGGATGGATACCTACGTCT   |
| 39723795 F 0-13:G>T-13:G>T | TGCAGTACGTGAGGTCTCTCGTAAAAACACATTATTTGGAATTACTTGAA<br>CAAACCATGCACCACAAGC   |
| 39725100 F 0-22:A>G-22:A>G | TGCAGGCACGACAACGTGTAACAAAAAACACTTAC                                         |
| 39713571 F 0-8:G>C-8:G>C   | TGCAGAAAGTGGAAGAACAACAGCGCCACAAACCCTAAGCCGATGT<br>GAAGGACAGAGAGGAGGGGAC     |
| 39723091 F 0-37:C>T-37:C>T | TGCAGCTTTTGCAGAGGAAGCTCAGCTAATGCCATCACATGGCAGGGAG<br>ATGCAAAAAACTTTGGCAAA   |
| 39725674 F 0-10:G>A-10:G>A | TGCAGACGCTGCCAATTATTCGAGCTTGTTTCATCACCAACTTTGTGTCTG<br>AAATGTCCTCACAAACAAA  |
| 39720023 F 0-9:T>A-9:T>A   | TGCAGCCACTCGTGGTGGATTTATTAC                                                 |
| 39724730 F 0-10:A>G-10:A>G | TGCAGAGAGAAAAACCGATGGAGAGAAGGCAATGGATTCACGGAAAT<br>ATTTACCTTAC              |
| 39721087 F 0-58:C>A-58:C>A | TGCAGGTGAGGACTGGATATTGCAGTTTTTAGATAGTGCTGGTATTTTTT<br>ACCCTCTACGATACGTCTA   |
| 39717402 F 0-15:C>T-15:C>T | TGCAGGGTTGAGGTGCCGAATCGATGTTGGAGTTGTCAATGAAGAAAAT<br>GGACAGGATCATTACTTCG    |
| 39720252 F 0-5:C>T-5:C>T   | TGCAGCTTTGGTAATCAGACGACAGATTTGGATATATGAATATATGAG<br>TTTAC                   |
| 39721951 F 0-64:G>A-64:G>A | TGCAGATACACTCCCAGCATGCAGATACATCCCCATCAGAAGGCCCAAG<br>TCGAGGCCGAAGATGGCGTT   |
| 39724875 F 0-28:T>C-28:T>C | TGCAGCAACGAAATGGCCAATCAGAAATTATCTGCAATCTTCTCGCTAA<br>GATAATTGTTAC           |
| 39715992 F 0-48:T>C-48:T>C | TGCAGCCGCCTGAACTAATTCAAAAGTTTTTCGCCAGCATTTCCTCAAATTT<br>TACCACTATAAGAACAGCG |
| 39726941 F 0-29:T>C-29:T>C | TGCAGAAATAGCTTTTTCATTAGAGGATACTTGTTTCATTTTAC                                |
| 39713257 F 0-51:G>C-51:G>C | TGCAGAAACGGATCGAACGACAGAAGAAAACAGAGTCAGTTCTCATTCT<br>CTGAAGACAATAACAAAGGG   |
| 39717205 F 0-19:C>T-19:C>T | TGCAGGCTGGTATAGAGCCCGCTTTTGTCTGTTTTTCGATTGTCTCTGAA<br>GAGGAGATGGAGAGGCGCA   |
| 39714706 F 0-44:C>T-44:C>T | TGCAGAGTTGCAGCCATTATGGGCTGCAAATTCACGTTGATAGCGCGT<br>GAAATCTGACTTTTTTTTTT    |
| 39724928 F 0-17:G>C-17:G>C | TGCAGCATATTTGCCCCGATTCGGTACTTATACAAGAAACCAAGAAGAC<br>CTCCTTTAC              |

|                            |                                                                        |
|----------------------------|------------------------------------------------------------------------|
| 39714787 F 0-54:T>C-54:T>C | TGCAGATAGACTAGACCTGCACTGACTGCGTTTTGGACATGAATCCGAAAGGTATGAATGCCTGATTGT  |
| 39713938 F 0-40:C>T-40:C>T | TGCAGAAGTCTTAGACATATTAGGCCATCATGTATCAAACCATAGAACAAAAAAGGGAAACTCGTAA    |
| 39716264 F 0-33:C>T-33:C>T | TGCAGCTACTGAATCTTTGGCACCATCAGCTACCGTAGTTGTGCAACACGGTTTTTTCTCCAAGGAAGA  |
| 39716456 F 0-46:G>A-46:G>A | TGCAGCTGCTTTACTTCGTTATTTTTCTATATTCATGCATGTGATGGCACACTTTTGACCCCATGATT   |
| 39720744 F 0-23:A>G-23:A>G | TGCAGTGGAAAAGTATCGGAGGCAGAGGAAATGTTAC                                  |
| 39727454 F 0-20:A>G-20:A>G | TGCAGAGGTATGTACACATGATCTTATACCCCTTTTGTAATTCATACATCAACGAAATTGTTTCTTAT   |
| 39719508 F 0-6:C>T-6:C>T   | TGCAGACATACAAAGACACCAAGCTCTTATATAAGATATGCGTACCTTAC                     |
| 39722934 F 0-35:G>C-35:G>C | TGCAGCTGAACTCCAAGCCGACGATCACTAGCAATGGCAAAGCAATTCTTCCCCACCATCGCAACTACG  |
| 39723929 F 0-29:T>C-29:T>C | TGCAGTCATGGAATGTCAACATAACATACTGTGGATGATTCTTCGACAGAAAGATCGAGATAATACAAA  |
| 39717670 F 0-16:T>C-16:T>C | TGCAGGTTTCATTTTCTTTTCGCCCTCTGCTAGAATAAAATGTTTCTGAATTTATTGTTGGCAGGCAGC  |
| 39713378 F 0-66:C>G-66:C>G | TGCAGAACTGCTGATCGAGTTTCTCAAGATTCAAACTCAAAAACTGGAAGACGAGACTTGAATGTCCA   |
| 39718509 F 0-39:A>G-39:A>G | TGCAGTGTTTCGCTGCTGCAAGAAGAGAAAAACAACAAATCAATAAA                        |
| 39726521 F 0-15:G>T-15:G>T | TGCAGGTCAAAAATAGGACCTCCAGTTTTCAATATCCTTTGTTCAAAGAATGCACTGTTGGGAGAAA    |
| 39716298 F 0-26:G>C-26:G>C | TGCAGCTATTGTAGCAAAATGAGCTTCGTAGTTGGTTTTTCCAAGATATAATGGTTTGTAGGAATAGTT  |
| 39716344 F 0-30:A>T-30:A>T | TGCAGCTCCTGAAAACAAAAGTGAATCAGCACCTGCTGCGGTGTCGAAA                      |
| 39717712 F 0-42:T>C-42:T>C | ACTGATGGAGAGGTTGCTGTGTTTCTACGAAAAGATTT                                 |
| 39728688 F 0-62:G>C-62:G>C | TGCAGCGAGCATATCCTAAAAACATTTCAAATCAGAACAATCACCAGTGAGATTTTTATATGTTACAG   |
| 39713471 F 0-35:G>A-35:G>A | TGCAGAAAATTCTAAAGTGTTCATGAGCATCATAGTAATTTGTAGGAAAGAGATTTTTCTTCAAATTC   |
| 39724813 F 0-27:A>G-27:A>G | TGCAGATCCTGTACTGCCATGGTTGTGAATTGTGTTAC                                 |
| 39722497 F 0-60:A>C-60:A>C | TGCAGCATAAGTTTGACCATTCTCTTTGAATTTTCAAATGCTCTCTTCAC                     |
| 39719476 F 0-24:G>T-24:G>T | CACAGTATGAGCTCCCAC                                                     |
| 39716884 F 0-55:G>T-55:G>T | TGCAGAATTATCTATTGGGTGTGTGCTGTTAC                                       |
| 39725578 F 0-15:C>T-15:C>T | TGCAGGAGACGGTAGCAACTGTAAGCCATGGCATATGCAAATGGTACC                       |
| 39726442 F 0-41:G>A-41:G>A | TGAAAAGGCCAGTGCCCTC                                                    |
| 39716904 F 0-24:T>C-24:T>C | TGCAGAAGACTGCGACAACCTCTCTAATTGGTGTAAAGTTCAAGCGCGTGTATCCGTATAAATGGAATA  |
| 39720462 F 0-41:T>G-41:T>G | TGCAGGCGGCTGATAGAGGAGGTGAAGGTGGAGATGAGAAAGATGACCGGCGGAATAGGGTTTGGTACT  |
| 39722573 F 0-58:A>G-58:A>G | TGCAGGAGCATTGTTGGGGCAAATTATTCAAATCTGTTTTTGGTATTAGTAAACCTCAAGTTTATGCT   |
| 39722981 F 0-8:G>C-8:G>C   | TGCAGGGTGGTGATTAGAATCTTTGACCTTTTGGTCAAGAATATATACTTAC                   |
| 39721416 F 0-10:T>C-10:T>C | TGCAGCATTTTCAAACGATAATTTTCATTTAGATCTGTCTATTTTTGTTTGGACAATATTTGGCTGCA   |
|                            | TGCAGCTGGCTGACATAGCCATTGGTTACTTTGGAAATATAACTCCACAA                     |
|                            | GAAGAATATTCACATCAA                                                     |
|                            | TGCAGAAGGTTCAATGCTCTTTCGGTTTCTATTTTGCATACACGTGCTTCGTATTTTTCGTTCTGATCTG |



|                            |                                                                            |
|----------------------------|----------------------------------------------------------------------------|
| 39721993 F 0-44:T>A-44:T>A | TGCAGATCAAGAGGTCACCGGTTCGAACCCGGTTGGGCCCTCTTTTTTCA<br>TCTTTTTTTTAC         |
| 39727728 F 0-54:T>G-54:T>G | TGCAGGGCATCCCCAAGATAAATCAAACACATCTAATCAAAACAGAGAA<br>GCGTCTCCTTTCAAGAAGTT  |
| 39716384 F 0-6:T>A-6:T>A   | TGCAGCTCTTGGCTCGAACGACAGGCCATTTGACTTCCCTACGCCATAC<br>CGTATTGAACCCACCTGCG   |
| 39724350 F 0-31:C>T-31:C>T | TGCAGTTGGACGACACAATAATTTCTTCACTCAGTGCAGTTATTGGATGA<br>AATCATTTTTGTAGGTTTG  |
| 39715775 F 0-66:T>G-66:T>G | TGCAGCATTGCAATATAACCTTACTCTAGGCAGGAAGGACCTAAGCAAG<br>CGCTCTCAACTCGAAATTTT  |
| 39723392 F 0-58:C>T-58:C>T | TGCAGGCTCCAACATGCTCCAGTATCCTCATACATTTGCTGTCCACGTA<br>TCATCAGACGCAGATGTGC   |
| 39714110 F 0-64:C>T-64:C>T | TGCAGAATTTTGTAACTTTTTTGGTACAAAATTTATTTTGTGTATGAAA<br>ATTCAGATTTCTACTCTA    |
| 39722139 F 0-66:T>C-66:T>C | TGCAGATTAGAATGTTTCTTTCTCATATCATATCTAAAAATACTGTT<br>GGACTGCCATAGCGGCTCT     |
| 39726481 F 0-34:C>T-34:C>T | TGCAGGGGTCATGCAGCAAACCTTTGCAACAGAATCCCAGTTGAACAGAG<br>ACTGATCAGATTACCACAAA |
| 39713670 F 0-53:A>G-53:A>G | TGCAGAACAGCACGCTTTGGTTATCTCGGGTTCAGCCATACATACATACA<br>TAAATTATCATTATGTTTG  |
| 39717436 F 0-41:A>G-41:A>G | TGCAGGTAATACAATTCACGCTAGGATATTCACAAATAGGGAAAAAATA<br>GTGATAAAAGAAGGAACATA  |
| 39720281 F 0-19:A>T-19:A>T | TGCAGGAACCAAAATTCCAAATCCATGAATCACTATCATTGTGTTAC                            |
| 39721538 F 0-25:A>T-25:A>T | TGCAGAATTTTAGTTTACAGTACAACTTTTCACGAGCACGTGTTAGGAT<br>TTGGGCAGTCTAGATGACA   |
| 39718459 F 0-37:A>T-37:A>T | TGCAGTGGTTATACTTTTCAAAAAAGATATGGATCTTATATAAGGCAATA<br>ACATTCTATCATGTTTACA  |
| 39722048 F 0-67:G>A-67:G>A | TGCAGATGAAAGTATACTCATTATTATGTTTCAGAGTGAATAGATGGAG<br>AAATAAGCGGTAAAAGGAGG  |
| 39721555 F 0-5:A>G-5:A>G   | TGCAGACAACTAAGATGAACTTCAAGGCTATAAAGATCCTTCCAGAAGA<br>CTTCCAAGAGATACTCCTAG  |
| 39715486 F 0-34:A>G-34:A>G | TGCAGCAGAAGTTTAGAATCAATAACAAAACCCCACTTGTA AAAAATGA<br>TAAAAAGACATTTCTATGTA |
| 39715927 F 0-17:C>T-17:C>T | TGCAGCCACATTCGAGCACACACACCAGAGGAAAGATACATTCTGCAA<br>TCGAATTAGTTTTTGTGCA    |
| 39720868 F 0-12:A>T-12:A>T | TGCAGTTGTGACATACAGTAAATTTATACTTCATAATTGGTTAGATTGGT<br>TGAATTCTTAC          |
| 39721823 F 0-26:A>G-26:A>G | TGCAGAGCTGTTCTGCCTCACCGAGGAATGCATTTTTAGTTGATTTATTA<br>CTTTGAACAGTTCGTTGAA  |
| 39724925 F 0-46:C>T-46:C>T | TGCAGCATAAGCCTTCTTCGGTAAGATGAGATGAGGGGTACACCATCGA<br>TTTAC                 |
| 46760754 F 0-25:T>A-25:T>A | TGCAGACTACGTAAGCTGATTGCTTTTCTTTTTTTTTTTTAC                                 |
| 39718867 F 0-51:G>A-51:G>A | TGCAGTTTCATGCAAAATGGCAACAAATATAAAAAGGTACAATCAAGAAT<br>GAGTCTTGTGCAAGTTGGGG |
| 39718906 F 0-56:T>A-56:T>A | TGCAGTTTGATTTCAATACAATCGATGCTGCTACTGACAATTTCTCAGAG<br>GAAAACCTGGTTGGGTGAAG |
| 39722467 F 0-14:G>T-14:G>T | TGCAGCAGGCGAGCGAATACCTTAGCCCACTGTATAGCTCGATTAGGAG<br>CTCATTCCCTTGCGATTTTG  |
| 39716402 F 0-47:A>G-47:A>G | TGCAGCTGAGGTACTGGTGCTGAAATTCCTAGCAAGTTGTA CTCTTGATT<br>GATATCTAAATTTATGGT  |
| 39717568 F 0-37:C>T-37:C>T | TGCAGGTGGTTCGATAGGATTTTGGTAGGTTGGGCGACAGCTTAGAGAG<br>AGAGGAATGATGTGAGAATT  |
| 39715116 F 0-60:G>T-60:G>T | TGCAGATTCTCGTAAGTCTCTGTCTCTATTCTTTTGTATTTAGGGTTGTTT<br>ATTTGAATTGTGTGGTGT  |
| 39714467 F 0-51:C>A-51:C>A | TGCAGAGATTCCATAGCGATGATCTCATTATAACTACACAAACCATCAC<br>CCCAAATAATATATTCAA    |

|                            |                                                                            |
|----------------------------|----------------------------------------------------------------------------|
| 39718708 F 0-13:C>A-13:C>A | TGCAGTTGAACCGCGCCGGTGGCTGGGCGACGGCTACGGCGGCGATGGC<br>GGAGAAAACGAGGACTCTGA  |
| 39721531 F 0-13:T>C-13:T>C | TGCAGAATTTAGATGAAATCGAATTTGGGTTTATTCAGCGAAGGAAGAC<br>TTCGGCTTGCAGTTGCATCA  |
| 39727191 F 0-22:A>G-22:A>G | TGCAGTAAATAGCCAAATTGGAAGCAGTAAGATGTGATTACAAATTCAA<br>CAGGAATTAC            |
| 39717727 F 0-26:G>A-26:G>A | TGCAGTAAATCTTCTTCCCTCCCTTCTGCTTTGAATCCCATTCCAGACTTGA<br>AGTAGAAAAAAGTTTACA |
| 39712843 F 0-32:C>G-32:C>G | TGCAGCCGTGCTCGTGGATTGTGTTTGTGTATCTTCCAATTCCTTGGAAAT<br>GGTGTAATGTATTGGCATG |
| 39715740 F 0-35:G>A-35:G>A | TGCAGCATGGATCCTCCAACCTTCACTATTTGATGTTTTTCTCCAACAA<br>AATACTCAACCATATATT    |
| 39726692 F 0-40:C>T-40:C>T | TGCAGTCTGTATCTGCTCCTTGAGGTTACGAATTTTCATCCCCATATTGTTT<br>TTGTATTTGTTATGCTCT |
| 39718081 F 0-27:C>G-27:C>G | TGCAGTCCACACCATTCCACTTGCTTGCTTTTCTGTTACCTCATATATATG<br>TGTTTTGGTATTATACTC  |
| 39713298 F 0-35:G>A-35:G>A | TGCAGTGTATGCGAGCAGAAGAGCCTGGAAGAAATGGGCAAAGATCGG<br>GTTTCGAAATTCGAGGCGAATA |
| 39723075 F 0-32:T>C-32:T>C | TGCAGCTTTCTTCGAACCCTTCCACCGCCACTGCCTTCATCGACAAACT<br>TCTGATTTCCATGTACCTC   |
| 39718756 F 0-42:A>G-42:A>G | TGCAGTTGCGACTATATGAATGCACAAAAAAGTAAACATATAATCAGT<br>TTGAAAGGCAGAAAAACACAG  |
| 39715950 F 0-67:A>G-67:A>G | TGCAGCCCTCAAACTTCACGCCGTTGTCTGGTTCGAGATCGACGCCGCC<br>GCAAGCCTTCTCCAGCAAG   |
| 39724424 F 0-44:C>A-44:C>A | TGCAGTTTCTCGACAAATCTTACTCAAATCATTCTCTGAAGTCATTTTC<br>TGGACGTTTTATCTTTTG    |
| 39713837 F 0-17:T>A-17:T>A | TGCAGAAGCCAATAAACTAAAGACGAGACTTGACTCTAAGCAGTGATGT<br>GCTTCACAAAAGGAAAATGA  |
| 39717958 F 0-65:G>A-65:G>A | TGCAGTATGTTGCTTAGTGAACCTATTTTTAGTTCGAAACTGTTCCAGAT<br>GTCTTTCCTTCCATTGGTTG |
| 39717561 F 0-37:C>A-37:C>A | TGCAGGTGGGTAACCTGGCAACCAAGTTCCTGTCGTAACGAAAAGGCAAA<br>GCCATCATGTAATATTAGGC |
| 39728026 F 0-45:T>A-45:T>A | TGCAGCCTGCAAGAATAAATAATCAGTTGTTGATAACAGTAATATTACC<br>AAATTTTAC             |
| 39715948 F 0-9:G>A-9:G>A   | TGCAGCCCTGCCGCCTAGTCCACCAACAATTCTAGCAAAGAGTTGCTGCT<br>TGGAGATCAGGGTTGGATC  |
| 39717266 F 0-22:T>A-22:T>A | TGCAGGGACATTCAATTGCCAATCAGAAAACCACATATAAGCCACAGTT<br>TTTATTCTTTGAGCCGAAAT  |
| 39718834 F 0-48:G>C-48:G>C | TGCAGTTTACTTTCTTGGTTTCCAAACAGTAATGATCCAACACACAACGT<br>TCTAATCATCTCTCTCTCT  |
| 39719864 F 0-33:T>A-33:T>A | TGCAGCAACGGATCAAACAACCTTATATATATATTTTTTTTATTTAC                            |
| 39713346 F 0-49:C>T-49:C>T | TGCAGCTTTTCTCGAGGAGTTTGGGTTGCTCAATCGAGAGTCGTTTGCTC<br>GATGGTCAAGGAGTTCCTT  |
| 39715202 F 0-24:G>C-24:G>C | TGCAGATTTTCAATTTTGTACTTAGTATTCTCCATGTTACGAATTTCAATA<br>TTGCATCACACACTAATT  |
| 39726045 F 0-13:G>T-13:G>T | TGCAGCAGCAGCAGCATCTTCATTCTTTCCTCTATCCCAATTGTCACCAC<br>AAAATCAAACTTCTCAAT   |
| 46753863 F 0-58:A>T-58:A>T | TGCAGAAGAAGCCATACGTATAAATAAACTTTTCAATCATCTTTAGTCCA<br>GTTGGAGTAAGGTGGACAT  |
| 39717229 F 0-64:C>T-64:C>T | TGCAGGCTTGCACCAACAGCGGCAGAGGCTACTGTTGTAAGTTGGGTA<br>AGTTCAATAATTATTCGTTA   |
| 39720224 F 0-31:T>C-31:T>C | TGCAGCTTCCGTCACCTTGACTCCACCATCATTGTATGGGTCGTTAC                            |
| 39718923 F 0-39:T>C-39:T>C | TGCAGTTTGGTTTTTATCTCTTTCATTTTTTACTTCTTCTTCTTCTCATCA<br>TCATCATCATCATCTCT   |
| 39715657 F 0-5:C>G-5:C>G   | TGCAGCATAATGATCTACATGACAAAAGCTTATTCATTTACATCAAATAA<br>TGAAGCTTGGTTGACAAGC  |

|                            |                                                                         |
|----------------------------|-------------------------------------------------------------------------|
| 39716288 F 0-21:C>T-21:C>T | TGCAGCTATCTGCTTTCTAATCGTTATTCCCAAATCTAATAATTGAAGGATCTCTTTTCGATCATGCAA   |
| 39717599 F 0-8:T>A-8:T>A   | TGCAGGTTTTTCATGGCATCATATTTCTTTGTACCTTATATCAATTCAAATGTTAAAAGCAATTTTTGGTC |
| 39713630 F 0-27:G>T-27:G>T | TGCAGAAATTGATGAAGTTGAAACCCAGAAAGAATCTCTTCTCACTTAGTATGATATGATTGTTTGTTA   |
| 39719317 F 0-25:A>T-25:A>T | TGCAGAAAGGCAACAAAATAATAATAATTATTATTAC                                   |
| 39722013 F 0-59:G>A-59:G>A | TGCAGATCCACACCAAAAAAAGGGTATTACACTACTTTGTTATTTCTGAGAAACGAATTTTACT        |
| 39725026 F 0-24:T>A-24:T>A | TGCAGCTGTTGGTGAGGCTGCATCTGGTATTATATTTTCTCTTATGTTTAC                     |
| 39717369 F 0-29:G>A-29:G>A | TGCAGGGTAATGTGGGAAAAATTTCCAATGGTATAGAGTATGAAAAATTTCCATACTACCTACCTCA     |
| 39715616 F 0-65:G>A-65:G>A | TGCAGCAGTACCAGGAAGTTCCCTTCTGCACGAGCGATTTTTTCTAATAGAAAATAAAAGAAAAATGTTA  |
| 39715251 F 0-30:G>C-30:G>C | TGCAGCAAAGAAATTAGCAACACAAATTTGGTCGTAGCGAATTCATGGTAAGGTATCATGAGAGTGTTCC  |
| 39723369 F 0-63:A>C-63:A>C | TGCAGGCGCCTGAGGTCATGGCCTATATAATCAGCAACTCGAGATAACAGTGTCTAATTCAAAGTTAC    |
| 39729562 F 0-32:T>G-32:T>G | TGCAGAAGAATTCGAGCGCCAGATCTCTTCGGTCTTGTTCAACATCATCTGGGTACTCATTAC         |
| 39716736 F 0-14:A>G-14:A>G | TGCAGGAAATAATGACAACAGTACTAGAAGTGTATAATTGTTGTGGTGTCCATCGTTTTAGCCATCAT    |
| 39717660 F 0-45:T>A-45:T>A | TGCAGGTTGTTTTCCCTCTGAAGATAGTCTGCTACCATTTTCTACTTGTTGTAGCTTGCAAATCTAGTG   |
| 39716433 F 0-28:G>C-28:G>C | TGCAGTGCCTATTCACTATCCTCCTACGAGTCTACGACCGTGACAGTTGGGCTCCTCCCATGTTGTTCC   |
| 39728857 F 0-63:A>C-63:A>C | TGCAGCAACTACAAACAAGCCAAAACATAATACTTCAGAACCCAATAAAATAACAAAAAACTTAC       |
| 39728697 F 0-58:C>T-58:C>T | TGCAGAAAAGCGGCAGCTGAACCACAAACGCCAATTTTGCATCGAAAACATTTTTTTTTTTTTTTTTTTT  |
| 39713481 F 0-48:T>C-48:T>C | TGCAGAAACAACATGTACCTGGCCTCAAGGAGAAGTGGAAAGTCAACTTCACAATAAAGAAAATATTC    |
| 39714726 F 0-52:A>C-52:A>C | TGCAGATAAAAGACAGCTAATATGTCATGGTTTGAAAAGAAATTGAGTCCATATTTGAATAGACCTAA    |
| 39717166 F 0-64:T>C-64:T>C | TGCAGGCGGACTCCATGGTACAGGCATCAGACCAAAAACAGGAAACGCTTATACAACCTGTAGAGTAAGT  |
| 39717277 F 0-24:G>A-24:G>A | TGCAGGGAGCTTGAGGCCCTTGAGGAGTGAAAGAAGAACGCAAGGTGGGGCCTTGAAGAACAGGCAGAG   |
| 39713570 F 0-46:C>G-46:C>G | TGCAGAAAGTCAAATTTTGGCAAGACAGGAAAAAAGTGCAATTTGGCTCCTGTATAAACTGAAGGGGTGT  |
| 39716690 F 0-48:G>A-48:G>A | TGCAGCTTTTGGATATAATCCATTTGAAAATTATTTCGACGTGTCGTTTGCATGTGATATCGAAATCT    |
| 39717593 F 0-67:A>G-67:A>G | TGCAGGTTAGAAGGAGAAATATATATATTAGAATGATGTACAATTTGGAATGACATGTGGATTTCTTGAA  |
| 39721942 F 0-43:T>C-43:T>C | TGCAGATAATACCGTTGAGCATCAAGATCAAGCACTTCGGTTTTTTTTCTTTGAATGAAGATTGAGGAC   |
| 39714984 F 0-47:T>C-47:T>C | TGCAGATGCAAGTTCTGCAATGAGGCTAGAAACCTGCAATCATAAATTGTCGGCCCCAGTTTAC        |
| 39724162 F 0-61:A>G-61:A>G | TGCAGTGTCTATCTATTTTCAGGAAACACATCCTTCAAGCCAATCTATCTAATTTTGAAAATAACCAAAA  |
| 39728125 F 0-64:T>A-64:T>A | TGCAGAAAACAATGGTGTGAAGAACATATGAGAAGAACAATCTTAGAAGTTATATTCACCAACTTACAG   |
| 39720135 F 0-27:T>C-27:T>C | TGCAGCTAGTGCGAGAACC GCCACACATACCGTTAC                                   |
| 39720644 F 0-41:G>A-41:G>A | TGCAGTCAACTCCGGTGGGATTTTGATTGAGCTCGCCGGTGGATTTCTCCGGCGGGTTTAC           |

|                            |                                                                         |
|----------------------------|-------------------------------------------------------------------------|
| 39715145 F 0-37:G>T-37:G>T | TGCAGATTGGTGGTTTTTTGTTTGTGGGAGTGGCAAATGGGTCAAATTTGGTTGATTTTCGTATTGATTTT |
| 39728136 F 0-45:C>T-45:C>T | TGCAGAAATTTTTTCAATGCCACTCTCTTTGATCGATCCCCTGAGCCACTAGTATTCCAAGAAATAATC   |
| 39716654 F 0-20:C>T-20:C>T | TGCAGCTTTTCATCTTCACCACCGTCTCTTCTTCTTCTCTCCCCCTTTTCATTTCCCTCAATCCTTCAA   |
| 39713717 F 0-67:C>A-67:C>A | TGCAGAACGACAATGTCCCACAATTTAGAAAGTCAAACCCATGAAAGTGGTGGTTGCTGATTGCCTCT    |
| 39721103 F 0-64:A>G-64:A>G | TGCAGAAAAAGAAATGGGTGTGTCTGTGATTTTTATAGAGAGGAGAGAGAAAGAAGAGAGAGAAAGAAG   |
| 39724638 F 0-23:T>C-23:T>C | TGCAGAAGACCTGGCCCTTGCAATGTTAC                                           |
| 39716557 F 0-25:T>A-25:T>A | TGCAGCTTCCAAAATTATATAATAATATGGCCTTTTGGGTCCATGCAAGA TGGTTTTGTGTTTTATTTT  |
| 39727500 F 0-47:C>T-47:C>T | TGCAGATTATAAGAGCAAATTGTGCATCATAAATCTACTATCCAGAGCTC AAAACCATAGCAAGGAAAC  |
| 39715460 F 0-44:G>C-44:G>C | TGCAGCACTCAGATAAAAAGTAATTCCAACATTTATACAAGACAAGATAA CCGTTCTATTCAAAGATAAA |
| 39716778 F 0-52:C>T-52:C>T | TGCAGGAAGAGGAAATTGACAAGTCTAACCAGAACTGAAGAATGCTCT TTTCTGGTTAGACTTGCAA    |
| 39718076 F 0-65:A>G-65:A>G | TGCAGTCCAACAAAATTGCAATTTCTTACTCTGTTCTCCTGCTGATTA TTTCATATCAACACTAATT    |
| 39718187 F 0-51:C>G-51:C>G | TGCAGTCTGCACTCACAAATGCCATATCCATATAATAAACCTTTTTTCTTT CTTACATTACACGTGGGT  |
| 39718260 F 0-47:T>C-47:T>C | TGCAGTGAATCGACGTTACGTTGTTTCGGTTTCGTACCCTTATTTTCTATC GAGGCAGCCACAACAGCA  |
| 39721676 F 0-11:G>A-11:G>A | TGCAGACTTCTGGCCTTCGGAGACGTGGGGCAGAGAGGCAAAAGCAAA GCTCTGTATGGAAATATGAAG  |
| 39727501 F 0-64:G>A-64:G>A | TGCAGGTTATAAGAGCAAATTGTGCATCATCAATCTACTATCCAGAACTC AAAACCATAGCAAGGAAAC  |
| 39721125 F 0-63:C>A-63:C>A | TGCAGAAAACAGATTTTCATAGCGTCTCTGACAATCCGAATAAAGGATTT GTCATACCAGTAGGCAGAAA |
| 39714059 F 0-62:G>T-62:G>T | TGCAGAATGTTTTTTTATCCCAAATGTACATATAATTTGTGAGCTGCCT ATTACAAGATCAGAATTTT   |
| 39715768 F 0-25:T>C-25:T>C | TGCAGCATTCTCTAAATAACCAGCTTCAGTTTGTATAAACAGGGTGCGA ATCTGGTGAAATGGGATTG   |
| 39720822 F 0-20:G>T-20:G>T | TGCAGTTC AACAGCCGCCATGTTTAC                                             |
| 39717914 F 0-34:T>C-34:T>C | TGCAGTAGTCACCCGCAAGGTAGCTTTCCGGCGTTGATTCAGCGACTGTG CGTGAGTACCGCGTGTAC   |
| 39725000 F 0-12:A>G-12:A>G | TGCAGCTATGGAAGCTTTAGATTTTTGGTAGAACAAATCCATGGACATGCA CTTAC               |
| 39725357 F 0-39:G>A-39:G>A | TGCAGTTATGAAATCAGAGTAAAAAACTATAGTTTATAGTTCCAAAAA GGATAATATTAC           |
| 39716762 F 0-53:G>C-53:G>C | TGCAGGAACTAAGGCACATTCCGAACAAGCTGAGAAGATGAATGATATA CACAGAAATGAGACGACCAA  |
| 39726790 F 0-50:T>A-50:T>A | TGCAGTTCCAAATTCCAATATAACTATACGAAGTAATTCCAATAAAAAAT ATACTTTTACGTGTAATTAT |
| 39713679 F 0-12:T>C-12:T>C | TGCAGAACATGATGTTTGAAGGATGTGAAAGTTTGGGACTTTCATTTGC CAGTCTCTGGCAAGGCAGT   |
| 39718335 F 0-15:T>A-15:T>A | TGCAGTGCAGAGAATTATGCGACTACACATTTAGTATCAATCCATGTGA ATAGTGAATAGAATGAATA   |
| 39722359 F 0-51:A>G-51:A>G | TGCAGCACCTCCCGCTGCCGGAGATAGACCGACGACCCACCGCCGGCC CGAAATCTCCGCCGTGCAG    |
| 39717890 F 0-13:A>G-13:A>G | TGCAGTAGCAGTAACAGTAGCAGTAGCAGCAGCAGCCAGCCATAAAT GCAGACCAAGCAACCAAGC     |
| 39729113 F 0-56:G>A-56:G>A | TGCAGTTGATTATAATCCATTAGTAGTTGCCATCATTGTCTGATAATTGG AAATGAGATTGGGTTACAG  |

|                            |                                                                        |
|----------------------------|------------------------------------------------------------------------|
| 39718283 F 0-65:G>A-65:G>A | TGCAGTGAGCGTCAGTAATCATGCAGTAGATGATGTGATTACTAGATTCCCTATTCTCAAATGCCGAGA  |
| 39716437 F 0-42:G>T-42:G>T | TGCAGCTGCCTTGTGTTTGCCTTTGGGCTAAAGCCATAGTTGCCTTTTCTGGGTCTATCTCCTCGCAG   |
| 39723649 F 0-59:A>T-59:A>T | TGCAGGTGTTATCAACCAGTACTATCAAAAAGTAATTCAATCCATTTGCTTCAGTATTTATGCTCAATA  |
| 39716921 F 0-61:A>G-61:A>G | TGCAGGAGGATTGAATCCGGATTTCACTTGGTACCTGTTTATCACATTTATTTCTAATTTGAGCGTCCT  |
| 39716644 F 0-33:C>T-33:C>T | TGCAGCTTTACTTTCTTTTCTTTATGGAAATTTTCGAGTGCAAGTCTGCACTGACATTTTCTTTTTATAG |
| 39718085 F 0-49:T>A-49:T>A | TGCAGTCCATAGGGATCTGTGTATTTTGAGAAAGACCACGTCTTTTACTTTCCCTAAATCCCCACCACC  |
| 39718658 F 0-7:T>C-7:T>C   | TGCAGTTTGTAATAGAACTAGAAGAGCTAGAATAGTATTCAAACAAAAAAGGTAAGAAGTACAATAA    |
| 39716246 F 0-17:T>C-17:T>C | TGCAGCTAATTCCTTCCTTGGTTTCGGTACCACGGGAGATCTTGCTACTCGTAAGAGGGAGCTAGCGGC  |
| 39718247 F 0-39:T>G-39:T>G | TGCAGTGAAGAACAGAACAATGAATCGCCATGGAAGAGGTACGGAAGACGAAGTTTGGAGTAGAACTAT  |
| 39717469 F 0-59:C>T-59:C>T | TGCAGGTATATATACTTCAATCCTATGATGGCAAATACATATGTACTTGTCCCTTACATCTTACTTACC  |
| 39721557 F 0-30:A>T-30:A>T | TGCAGACAAGCAACAAAAACCCAAGTTGCAAACATGAAAAAACTTGAATCAACTAACGGAGGATGAT    |
| 39714358 F 0-30:T>A-30:T>A | TGCAGAGAAGCATGGCACCTGCGCAGCTCCTGTAATCATAGGCGAATATGATTACTTCACCACAACCCT  |
| 39724659 F 0-23:A>T-23:A>T | TGCAGAATAATTGCGTTATTGATATGAGAAGGTAAGGCCAATGCCTCTATGGCTTAC              |
| 39718602 F 0-41:G>C-41:G>C | TGCAGTTCAAAGAATCTCAAGAAAAGGATGACAGTTTTTCTGCTTGTGCTCAAAAAGGGTTATGCAGGTA |
| 39726350 F 0-65:T>C-65:T>C | TGCAGCTTTTTTTGGGGTTCAGATGAGATTCTTGAACCTTCCATTTCTTATAGCGGTACTGATTTTAC   |
| 39716008 F 0-36:T>G-36:T>G | TGCAGCCGGTGTGGTGACTCTTGTGGCATAATGTTTTCTCACAGGCGAATCGCTCTATTTTGTGGAAG   |
| 39717915 F 0-47:G>A-47:G>A | TGCAGTAGTCAGATATGCCTCATTTTCATCAAGGGAAGACCTGTTGAGCATGAAACGTTATTTATTGGG  |
| 39718211 F 0-26:C>T-26:C>T | TGCAGTCTTCTCCCTTCTCTTTTTTCCCTTTTCAGAAAAGAAAATAACGTCTGTTTTCGGTTAC       |
| 39721787 F 0-57:T>G-57:T>G | TGCAGAGCAGAGAAGAACCCTGTAAGTTTTATGTCTCTGATAGAACTCTCTATTGATCGTTTTTGTG    |
| 39713361 F 0-44:C>T-44:C>T | TGCAGTACTTTCTATCATCTTTTTCATCTTTATTGAGATTTGTAGCTCGACTTGGGACTCTATTCTTCAA |
| 39714035 F 0-66:G>A-66:G>A | TGCAGAATGATGGTCAAATAAACAAATCACTATCACACTTTTGAAGGTTGGTGTTTTTATATAACAGGT  |
| 39717814 F 0-63:C>A-63:C>A | TGCAGTACAACATATGATGGATAGAAAACAAGATCAGACAAAGATATGGCGCACCATAAGGAACAAGAA  |
| 39714569 F 0-51:T>G-51:T>G | TGCAGAGGATAATAACAAGTGAAAATGGTTTTTCTTATTGAAAAGGTTGCATAAAAAGTGCTTTTGAAGA |
| 39717844 F 0-65:T>C-65:T>C | TGCAGTACGACCTCTGTGTAAGGTGTGGGGCTGGGTGCTGTAGTGTTGGATATTAGTGGAAGCATAGT   |
| 46755915 F 0-66:A>C-66:A>C | TGCAGCTGCATTGCCAATTTAGCAAATACCAAATAGGAATTTATAAATTAATATTGAGGAAAATTCATT  |
| 39713738 F 0-34:C>G-34:C>G | TGCAGAACTTCGACATCGGCTTACGAGGGCCATCTCGGCGGCGGCGGC                       |
| 39715126 F 0-50:G>C-50:G>C | GGTGGCAGCCATGGAAGAGG                                                   |
| 39715126 F 0-50:G>C-50:G>C | TGCAGATTGAATACCAAATGGGCTGTGATCTTGCTATTCTAATCTTGCTGATGCACTGGTCAGCTCAT   |
| 39713435 F 0-58:T>A-58:T>A | TGCAGAAAAGGAAAACCCAGATTCTACGGGTGTGATTATAGGAATTCAGAAATCGGCCTCGGTTACGGA  |
| 39717729 F 0-15:T>G-15:T>G | TGCAGTAAATGTGAGTGCCTCACTCTTCTCACTATCTTATTCCTCATGAGCATAACATGCTCCACATA   |

|                            |                                                                             |
|----------------------------|-----------------------------------------------------------------------------|
| 39725261 F 0-43:G>C-43:G>C | TGCAGTCAAATGCTCTACCACTGAGCTATGGACCCATTGTTGGGCTATTGTTAC                      |
| 39714082 F 0-13:T>C-13:T>C | TGCAGAATTCTTTTTCTGAACATTTTTGCTAAGTTATGCTACTGCCAATCA<br>TTTCTTACTGTTTACGGT   |
| 39715484 F 0-22:C>T-22:C>T | TGCAGCAGAAGAACAAGATAGTCTCATCAACAATATGAACATGGGTAAC<br>AATCCTTTCCTTCATAGAAT   |
| 39717488 F 0-57:G>C-57:G>C | TGCAGGTCACATGTTTTGGGCTTTTGGGCTTGAATCCCAATCCAATAAA<br>TGGCCCAGCCCAGCCCAGC    |
| 39718235 F 0-26:G>T-26:G>T | TGCAGTGAAAGTCTTTGATTCTAAAGAATAGAAATCAAAAATTGTATTT<br>GTATTGATTCCATTTAGAA    |
| 39720146 F 0-20:G>A-20:G>A | TGCAGCTATTTTATCACCTAGAATCTATGAATTATATATTAGTTCCCAATT<br>AC                   |
| 39721684 F 0-32:C>T-32:C>T | TGCAGACTTTTGTGTTTGGTGGAGTTTCCCTTCCATTCTATAGGACAACAGT<br>ACTTGATAACTTTTAGAA  |
| 39718140 F 0-59:G>A-59:G>A | TGCAGTCGGTTTGTGTTGAAATGTGCCGAAGGAAGATCTACAGTCATTTGA<br>AAGGATTCTGTTCCCTCATA |
| 39720020 F 0-39:A>G-39:A>G | TGCAGCCACGTTGAATAAATTTTTCTCCAAGTAAAGATAAAGGAAAGGAA<br>GCATTCATTTAC          |
| 39719335 F 0-37:C>T-37:C>T | TGCAGAAATGTTGAAAAATATATATTATAGTTTCTAGCCCAATTAC                              |
| 39721093 F 0-20:A>G-20:A>G | TGCAGAAAAAATATAAATGAAAAACATGGTGGTATTTCCATTAGTTCT<br>AAAAAATAATTAC           |
| 39721458 F 0-48:A>G-48:A>G | TGCAGAATAGCACCAACTGAGTGTCAAATTCCAAAGAGATTTTATTGTA<br>GTCCAACTCTAAAGAAAATA   |
| 39722355 F 0-34:T>G-34:T>G | TGCAGCACCCCATTTGGGGACTTTTCTCAGTAACCTGGCAGACCAAACAA<br>CGACAGTGTTATTGTGGTA   |
| 39717005 F 0-11:G>C-11:G>C | TGCAGGATGTGGCATGAAAATCTGGAATTCTTTGAATTATATATTTTGAA<br>TGATTAGCATTTCCAGCCT   |
| 39716749 F 0-8:T>C-8:T>C   | TGCAGGAATAAATGGCTAAGACTTTTCTCTTCTATCAGGCACGCACAGCA<br>ACCATTGGGGACTTTTGGAA  |
| 39727187 F 0-22:T>A-22:T>A | TGCAGTTTTTCTCCGGTGTCTCCCGTCCGTCGTCGGCACCGGCGACAGGT<br>CTTTTAC               |
| 46753970 F 0-52:G>A-52:G>A | TGCAGAAGTATATTTCTCTGATCTTTTTTCTCCCTTCTGGGTCAAATGTC<br>TGTATCCTTACCCATGTA    |
| 39715240 F 0-66:A>G-66:A>G | TGCAGCAAACAGAAACAAGTATTATTGAGAGATTTTCATGTCAAGAACT<br>AGAACATGTAACCACTCAAG   |
| 39715245 F 0-22:T>G-22:T>G | TGCAGCAAACACTACGGCCATGGATTGGCTTTCTTTCTAGCTCCAGCTGGGT<br>TTCAAATCCCTCCCAACTC |
| 39718028 F 0-51:T>C-51:T>C | TGCAGTCACATAATGGAGTTACTGTTGTCATAATAGATCAATATTTTTTA<br>TTACAAAATATCATTTCAT   |
| 39728420 F 0-44:A>C-44:A>C | TGCAGTTTTGACTTCTTTGAAGATTTCCCTATTAGTTCGCCTCCTATTCTCT<br>TTCCTTGCTTCATCCTTG  |
| 39717149 F 0-57:G>T-57:G>T | TGCAGGCCTTCCAAAATGAACCATTTTTCTGAGAGTATTTGAAGAGAGA<br>GAGAGAGAGAAAAAGAAATC   |
| 39716175 F 0-9:T>G-9:T>G   | TGCAGCGGCTCGTCCACGAGCACGATGGCCCTGCGCGATTTCTTCTCCG<br>GCGAAAAAAGATAGATCTG    |
| 39718272 F 0-47:T>C-47:T>C | TGCAGTGACTAACTTGTTGACATTTACTTCAGCAATCCTTCCTTCTTTGAT<br>AACTTTACAATTGAATT    |
| 39725399 F 0-7:T>G-7:T>G   | TGCAGTTTTTGATCCTGTCCCTGTCAGACTCATGGTTAC                                     |
| 39727248 F 0-41:A>G-41:A>G | TGCAGTGTCAACTGTGAACCATCCATAGGGACCATCAACCTATGTCAGA<br>TTAC                   |
| 39728076 F 0-16:A>G-16:A>G | TGCAGGTTCCCTCGCTTAGTCCGGATGCATTCTGATGAGATGGAGGTTGAC<br>TTCTTTAC             |
| 39714389 F 0-65:T>C-65:T>C | TGCAGAGACATGGAATATGGAAAGGATTCTATCGTTTTCTTTTGCTAAA<br>GCTGTGAATCAGTGTTATC    |
| 39715912 F 0-11:G>C-11:G>C | TGCAGCCATTGGAAAGTGCGATCCGGTGCAACCTGAATGCTCGAATCCT<br>TGGGAGAATTTTCGTACGCC   |

|                            |                                                                         |
|----------------------------|-------------------------------------------------------------------------|
| 39716338 F 0-49:C>A-49:C>A | TGCAGCTCCCTGCTTTGATTTGTCCCGGTGTAACATTGGTGATATCTCCCC TTGTGCTACTTATTCAAG  |
| 39723705 F 0-47:C>T-47:C>T | TGCAGGTTTTGGGCCGGCCCAACTTCTAACCTAAATGAGGCCATTGCAT ACGGCTTATTTCCATTTTT   |
| 39725030 F 0-18:G>A-18:G>A | TGCAGCTTCCCTGTTGTGTCGCAAGGCCAGGCTGTGCAGCCTCAAATTAC                      |
| 46756926 F 0-27:T>A-27:T>A | TGCAGTAACAATATAAAACAAAGACTTTGAAAAAAAAAAAAATAGACTTT TAGAAAAGTAGTTAC      |
| 39721326 F 0-6:G>A-6:G>A   | TGCAGAGGAAATGGCATTGTTTGTGTATGTGGTTTTTACCTAGAGAGA CTGCACTGACGAATATTGT    |
| 39721439 F 0-48:T>C-48:T>C | TGCAGAAGTTCTATGGACAATGTACTGACAATGCTTCTTCGAGACTGGTT CAAATAAACAAAGAGGAACC |
| 39714138 F 0-20:G>A-20:G>A | TGCAGACACAAAATTTACCCGACAATCAATTCAGATTGACACAAACTGC CAAACTAATAGAAAGGGCTA  |
| 39718052 F 0-64:A>T-64:A>T | TGCAGTCAGTAGAAGAGATCTAAATTAGAGGCCTTCAACTTCAACTGAC ACCAACCAAAAAAGCAACAA  |
| 39716680 F 0-25:C>G-25:C>G | TGCAGCTTTGTGTACCACAAAATAGCCAACAAAAAGACTAGCCATGTTA CAACACTTACGGTTCTAAAT  |
| 39719419 F 0-28:G>C-28:G>C | TGCAGAAGGCCTTGATACGGTAAGGAAAGAAATATATAGCCGTTAC                          |
| 39716346 F 0-44:A>C-44:A>C | TGCAGCTCCTGCAACTTCAAGATCTATATCATAATGGACATCGCAAGGA GTAAAATTTAGCTCACACGA  |
| 39727021 F 0-9:C>T-9:C>T   | TGCAGATACCCTGTAAAGAACAAACGTTCTTATCCCCATTTTTTTTAC                        |
| 39719636 F 0-16:C>A-16:C>A | TGCAGAGGTAAGTTATCTTTTCTCTGTGTTAC                                        |
| 39714171 F 0-48:T>G-48:T>G | TGCAGACATCACTTTATTGAATCAACCCATAGAATAAAATAATATACAT AATTTCAAGTGACAAAGAAA  |
| 39714721 F 0-68:G>T-68:G>T | TGCAGAGTTTTGTTTCCCCTCCTTGATCTCATCATAGTTGAACAAGACAT GGTCTTTGGTGTAATATTG  |
| 39722125 F 0-24:C>G-24:C>G | TGCAGATGTCTTCAAACCCACCCACCAACCCACCCCACTCGCTCTCTGGC AAAGGACAAATAAGTAATT  |
| 39722310 F 0-53:T>A-53:T>A | TGCAGCAATCGCCATAATCTCGAACGCTTGACGCCCTGCACGGACCGTA TACGTACGACACGATCAGTC  |
| 39715227 F 0-57:C>T-57:C>T | TGCAGCAAACTACAACGGTATTCCATAAATCAATGGCCGTCCAGTTTA GATTATAGCGATACCATAACA  |
| 39718020 F 0-30:C>T-30:C>T | TGCAGTCAATCAAATAAGTGGTAGATATTCGATCTACTACATCTGTTTT TTTTTCCGCTCTATTTTTG   |
| 39717745 F 0-60:A>G-60:A>G | TGCAGTAACCGGCTTCTCACCTGTTTCCAAAAATTCAAGCCATTCAATAC GATTATTGGAAGTTGGTAA  |
| 39719535 F 0-10:A>G-10:A>G | TGCAGACTAGAATTTGTATGTAATTCTATTTTCATGTGACAAGTACTAGATTAT TAC              |
| 39721536 F 0-36:G>T-36:G>T | TGCAGAATTTCTGTCCAAATCAACAGAAATGAAAAGGGCAATTACCCA GAGCTAAAATCTGATTTTTT   |
| 39716373 F 0-48:C>T-48:C>T | TGCAGCTCTGCAAATTGGGATCGAAGGCGTCCAATGAATAGAACCATTG GGAGCCGCCATTGTTGGGCA  |
| 46757482 F 0-63:T>A-63:T>A | TGCAGTTATACTTTGGATTTTTGATACACTTCCAGCCATTTTTTTTCAA ATTCGTGGCTAGTCGAAA    |
| 39713842 F 0-52:A>C-52:A>C | TGCAGAAGCCTTTTGGACTTTGAGAGGTAGGCCTGCATCATCTCAATCTC AAAGTAACGAAGAGAATCA  |
| 39715103 F 0-65:T>G-65:T>G | TGCAGATTCCTCTTTACGACGTCGATTTCCGGCTCCGGCCGCCGCTCTG GGTCACTTTTCCGGCTCTC   |
| 39716015 F 0-9:G>T-9:G>T   | TGCAGCCGTGTGTTGACTAATCAGACATATCCCTCCTGTTTTCTCCACTTT TCCAGCATAGGGCCTCTC  |
| 39726095 F 0-24:T>A-24:T>A | TGCAGCATTTGATTCTGAAGCTTGACGGTTTCAGAACTTCGCCATCTG GATAACTAGTACGAGTTTG    |
| 39713771 F 0-56:T>C-56:T>C | TGCAGAAGAAGGAGAAAATGGCGGATTCTCGAGCAGCGAACAACGAAA AGGAGAGGTGGCGTTCCGGTCA |

|                            |                                                                                                                        |
|----------------------------|------------------------------------------------------------------------------------------------------------------------|
| 39714637 F 0-47:T>G-47:T>G | TGCAGAGTAACAGGCTCGACTTAGCACTCGACTTTCTGGTTTTGATGTATGTGTGATTTGATTTCTAAT                                                  |
| 39714607 F 0-28:G>A-28:G>A | TGCAGAGGGTGGCTAACTTCCTCACTTTGTCTAGTACTTGGCTGCAACCGAAGTTCAGAGGTGCGGCAC                                                  |
| 39718540 F 0-50:G>T-50:G>T | TGCAGTTACAAGATGACGGGTGGTTGATGGGTGTTGAAGAAGAAGAAGTAGGAGCTAGGGAGAGAGAAA                                                  |
| 39722938 F 0-51:G>A-51:G>A | TGCAGCTGAATTTGCCTTTTTCTTTTGAATCCCATACGCAGCTTTTGATGCGCTGGTGGTTTTCTTTT                                                   |
| 39717234 F 0-28:A>G-28:A>G | TGCAGGCTTTGCTACGAGACTGATGGGAATGAAGGTCCTTGTCTTGACGAAGCTGATCATTATTAGA                                                    |
| 39718055 F 0-34:A>C-34:A>C | TGCAGTCATATATCAATTTTATGTTTGCACCTCCATATCATCATCTCATTGCTCCGAATACTAAACAGG                                                  |
| 39717124 F 0-49:A>T-49:A>T | TGCAGGCCATTTATCTTTTCTCAGAGGTTGCGCCGAGCAAATAACAAAATCTTCTGTTTTTCTTGG                                                     |
| 39715338 F 0-45:A>G-45:A>G | TGCAGCAAGCCAGCAACTTGGGTCGTTCCGTTTCAATCGAGTGCAAAAAGAAAGTGAAGGCGAAAACAGAA                                                |
| 39728376 F 0-30:C>T-30:C>T | TGCAGTCAATCAAATAAGTGGTAGATATTCGATCTACTACATCTGTTTTTTTTTCCGCTCTATTTTT                                                    |
| 39721732 F 0-11:C>T-11:C>T | TGCAGAGACGGCAGAAGAAGAATTAGCACAATTCTTCCAGATCCTTTGTCCGTCATGGGAGAAGAAAG                                                   |
| 39722956 F 0-59:A>T-59:A>T | TGCAGCTGCATGTACGGAATAACGGTTTATGTCCACGTCATCAATAAATAACCATAAGTATTTTTTTTT                                                  |
| 39717152 F 0-47:C>G-47:C>G | TGCAGGCCTTGAATCCGACGAGACGAAGCCATCTCGTTGTGCACATGCTTCATCTTGTCGAGCTTCTTG                                                  |
| 39716207 F 0-8:T>C-8:T>C   | TGCAGCGTTGCCGCGTCGTCCAGTTTCGTTCGAACCCGAGCGCTGCCGCCGCGTCTTCTCTTTCTCCT                                                   |
| 39718329 F 0-36:G>T-36:G>T | TGCAGTGCAAAGAGCATATATATCTAGTTGACAAGAGGGTAGTGCGTATCAATACCATTTGGAAACAAA                                                  |
| 39727561 F 0-43:A>G-43:A>G | TGCAGCAGGCGTTGATTCTTGAAACTTGAAGAACCTGGAGTACTAAGGAATTATGATGGAGGGGAAC                                                    |
| 46754652 F 0-51:C>T-51:C>T | TGCAGATCATTGTGAATGACTTGATTGGAGAGAACGAGGAGGTTTGAGGATCCATATAGGGACGTTTTA                                                  |
| 39716398 F 0-5:T>C-5:T>C   | TGCAGTTGAGATCCGGAATAAGGTCGAGGACAGAGGATCATGGTCATCAAGGGCGCTCTGGAAAGCGCG                                                  |
| 39723920 F 0-13:G>C-13:G>C | TGCAGTCAGCACTGCATCTGCATAAACCATTTGAAAAAACAACAATCATGACATACACTTAGAATTC                                                    |
| 39720238 F 0-12:G>A-12:G>A | TGCAGCTTGCTTGTAACCTTGAAATTTTCAGTTGCTGAGATTTTGGCACAGTACTTTAC                                                            |
| 39723011 F 0-48:T>C-48:T>C | TGCAGCTTCAATATTTTCATTGGTTATTTTATTTGGGACAATCCCTTTTTGGTGTCCAATCAAATAACCA                                                 |
| 39718141 F 0-30:G>A-30:G>A | TGCAGTCGTATGAGGCCAGTTTGATTGGAAGAGTTCAGAATGAGAAGATGAGGAGTTCAAGCAAAAATAG                                                 |
| 39717450 F 0-57:C>A-57:C>A | TGCAGGTACGACATATTCGACGTTCTTCACTTCCAAGTGTTCATTAGACTGATGTTCCGTTGGTTAGT                                                   |
| 39714744 F 0-27:A>T-27:A>T | TGCAGATAAGCTAAAGTTTTGATCTCTAGGATGGCTGTTCAAGTACGGTTCCTTTGAAATAGAAAATCG                                                  |
| 39716263 F 0-30:A>G-30:A>G | TGCAGCTACTCGGTCCTTGCTAGAGACAAAACCTTCAATGCAATAATTCATGCTGAAGGGGTAACAT                                                    |
| 39717758 F 0-11:T>C-11:T>C | TGCAGTAACTTTTGCCATGGATTTATGATTTCAATGTTGATAGGTAAGTATTCCAATAAGTCCA                                                       |
| 39725057 F 0-5:G>T-5:G>T   | TGCAGGAACGAGAAGTGCGAAATAGTTTTCTCTTCGATGGCTTGTGTTACTGCAGCAGAGAGAACTGAATGAGGCATGTATTCAGCTGCGGACTGTAATCTTATTGTATTTGTCATAT |
| 39726037 F 0-14:C>T-14:C>T | TGCAGCAGGGCATTTTAGACTAAAATATAAAGCAGAGAATGCCATTGCTATTTGGCTAATTGCAACCGC                                                  |
| 39715605 F 0-41:C>G-41:C>G | TGCAGTTTTCTTCTATCGATAGCATTGGAAATGAAAAAAAAAATTCTTGAATGACTTATAAAGTACACG                                                  |



|                            |                                                                             |
|----------------------------|-----------------------------------------------------------------------------|
| 39715108 F 0-8:T>C-8:T>C   | TGCAGATTTGTGAACTTAGGGTCTATCTAAATGGTGAAGGGTCCACTA<br>TGATTTAGTTGGAGCAATT     |
| 39727514 F 0-7:A>G-7:A>G   | TGCAGCAACCACAAAAGGAGGAGTTGACCTTGAGGCACTTTTCTGATGA<br>TGTTGTCACAGGTCATCAAG   |
| 39718113 F 0-5:T>C-5:T>C   | TGCAGTCCTCTCTCTAGTTGAGAAATCTGAAAATGATAACCTCTGAGGC<br>TCTAAATTCAAGTGCAATC    |
| 39715085 F 0-15:G>A-15:G>A | TGCAGATTATTTAGTGGCAGCATGTGGTGATGGCTTTATCTCAGTGCTGC<br>CGGTGCTCGATACACCCCG   |
| 39715867 F 0-41:T>A-41:T>A | TGCAGCCAGAGTGAAATATAAACCATCCACAGCATTCCATTACATGAT<br>CTAAAAAAGAAAACCTACCCA   |
| 39720134 F 0-13:T>A-13:T>A | TGCAGCTAGGCTGTCAACTTTCAGTCCAGACGCTTACTTGGGCAAGTTT<br>ACTTAC                 |
| 39727445 F 0-52:A>T-52:A>T | TGCAGAGCCAATTGTTTTGCTGTCTCAATAGCTTCTTCACTGGATATCTG<br>CAACAATCACTGACACTAT   |
| 39725832 F 0-43:C>T-43:C>T | TGCAGATCAAAACGACGTAGTATTTCTGTCTCCCCTAGTCCAAACTCTGCT<br>GCTTCTCTGGGAATCACCT  |
| 39713339 F 0-50:C>T-50:C>T | TGCAGCTCGAGCAACATTCTTGAGAAATGACTTGGCGGCGTGGGCAGAC<br>CCATCGTGATTGATTGAAGA   |
| 39717437 F 0-54:T>C-54:T>C | TGCAGGTAATCACCATTTGAGAAGTGGGATTGGATAATCGAATTCCAAA<br>TAAATTCGTCCTAATTATGA   |
| 39715164 F 0-25:A>C-25:A>C | TGCAGATTTAGAATCGAACTTTGAGAAACCGTTGTTTCAAGAGTGCCAT<br>AATAATTTTCGATTATTGCA   |
| 39717989 F 0-28:T>C-28:T>C | TGCAGTATTTGATTCTCCTAGATATCACTGGAAGTGTATCATTCTAATTT<br>CGTGCTGGATTGAGCATA    |
| 39714008 F 0-15:T>A-15:T>A | TGCAGAATCCTTGTGTTTGGGAATAAGTTGTGTAAAATCTGCACACAGTG<br>TTTCTTCTTCTCTCTGCTT   |
| 39724780 F 0-7:A>G-7:A>G   | TGCAGATAAATTCTTGTCTCCCATGAGAGGGTTTATGTTTATCGTTAC                            |
| 39717861 F 0-14:C>A-14:C>A | TGCAGTAGAAATTGCTTGGATGAACCACTACAATGTGCTTACGTTAGTAA<br>TGTCCTTATTTTTATATT    |
| 39714733 F 0-25:T>G-25:T>G | TGCAGATAAATTTAGAAAACCACAATCAGAGACTTGCTTAGCCCAACTC<br>ACATTTCACTGTGAACTATC   |
| 39724227 F 0-26:T>C-26:T>C | TGCAGTTATCTGAATACTCAGGTTTCGTTTCTCCCCTTCTTCTCTATGCT<br>ATCTAAATTAC           |
| 39713556 F 0-34:C>T-34:C>T | TGCAGAAAGGATCCAAGGGCAACATAGACCATTGCAAATTCAAACCAAT<br>ATTTTGTTTTTTTTAGACAA   |
| 39714921 F 0-51:A>G-51:A>G | TGCAGATCTCTCTCAAGCTCTAACCAAATGTTTTTTCTCCCCCTCTCCAA<br>ACTTGAGGTCAAAGATGA    |
| 39717900 F 0-29:C>T-29:C>T | TGCAGTAGCTCCAGGTTCTGCCAAGGCACCCAAAAAAGATATTTGCAC<br>CAAGTAGCCAAATTTGTTAG    |
| 39716844 F 0-60:C>T-60:C>T | TGCAGGACATGTTTTTACCATCTCAGTGGCTCCTCCCTGTTTAGTAAGAG<br>ATACTTCAATCTGGGAGAA   |
| 39726792 F 0-15:A>C-15:A>C | TGCAGTCCCCTGTCATTTATAGCTCGAAAGGATCAACAGAATATTCAA<br>CAACTGTGCTTAC           |
| 39713355 F 0-14:A>G-14:A>G | TGCAGGGGTTTCGTCACGGCTCATTGGATCTGGGTGTTTGGGGGTTGCGGA<br>TTTGTGGTGGTTGCATGGA  |
| 39717674 F 0-60:G>A-60:G>A | TGCAGGTTTGATATCTAAATTGAAAACGAAGAGGTTTCATGATTCAATTCA<br>TCAAAAAGAAAGCCTGGAAG |
| 39725872 F 0-14:C>G-14:C>G | TGCAGATGAAAGAACAACCAAAATTACTCTATCCATTTCCAGTATGTG<br>AAACTAACTTGCATTGAATA    |
| 39713584 F 0-60:A>G-60:A>G | TGCAGAAATAATAGAAAAAGAAACGGAAGAAAAGAAAGAAAGATTTTAG<br>TAAAAACGATGAAGAATAAAT  |
| 39718790 F 0-32:C>A-32:C>A | TGCAGTTGGCTGCTAGATAGAGAAAGGGAAAGCAAAAAGAAAAGAA<br>AAGAAAAAATTAC             |
| 39714062 F 0-54:T>G-54:T>G | TGCAGAATTACAAATTTCTAAAGCTTACCTCGTTATAATGAGCAGAAAT<br>TTCTCATGAAGAGATACA     |
| 39717222 F 0-23:T>C-23:T>C | TGCAGGCTTCTAGATATCTTTTGTTTTTTCCCACAGACGATGCCAACTGTT<br>ATGCCAAAATTCGGACAG   |

|                            |                                                                              |
|----------------------------|------------------------------------------------------------------------------|
| 39718470 F 0-25:C>T-25:C>T | TGCAGTGTAATATTATGGGCAAAGCGGGTTGGACCGGTTTCGATTTCTTT<br>CACTCCTATGTAAATACCG    |
| 39717690 F 0-19:T>C-19:T>C | TGCAGGTTTTTCTTTCTTCTCCTCCAATAATGTGGTGTAAATAGTGTTTTTG<br>CTCTTGCCTTTAGCTTGT   |
| 39715687 F 0-58:T>A-58:T>A | TGCAGCATCACAGATAGAAGAAAATACAACAGGTAAACTGTTGATGAAA<br>TATAACAACCTGCTTCTAGGA   |
| 39716124 F 0-47:G>A-47:G>A | TGCAGCGATCATCTAAACATGTCCATTCCAACCTCAATACTTTTTGTGCA<br>GGCCACAACATGCAACTCG    |
| 39717525 F 0-9:T>G-9:T>G   | TGCAGGTGATGGTTCGATCAACAACACGATTTCACTGTGGGTATCGTTCAA<br>TCGGCTGGTGGCTGTTTCG   |
| 39718870 F 0-17:G>A-17:G>A | TGCAGTTTCCAGCCGACAGCCCTGCAACAAAATCCACCAGCTCAAACCTG<br>AGAAAGGGAAGAAGAGAAAAG  |
| 39718703 F 0-51:A>G-51:A>G | TGCAGTTGAAAAGAGTTTGTTTTTGCTTGCTATCTTGTTTACTATATGCTT<br>ATTTTCTCATTACTCCTT    |
| 39729597 F 0-57:G>A-57:G>A | TGCAGCTGTTGAAAGGGCCCAACAAAAGGTCCCATCGCAAGAACTTTA<br>GGACGGTCGTAGTTAC         |
| 39723153 F 0-6:G>A-6:G>A   | TGCAGGGATACTTCTCAATTCAAAGGAGAACCCTGAACTATTTTTGGTAAA<br>GTATTTTCATAAGTGAGGTAA |
| 39713546 F 0-51:A>G-51:A>G | TGCAGAAAAGCAATGAACTTGTTTGATCAATCTAGTACTGACCCATATG<br>GTAGAGGATGGAGGAAAGAG    |
| 39725225 F 0-22:G>A-22:G>A | TGCAGTAACAGTTAGAGATGAAGCCTTCTTTAC                                            |
| 39723126 F 0-60:A>G-60:A>G | TGCAGGAAATGTAAATTGATTCAAGTTGTACAATATTATCTAAGAAAGG<br>ATGGGAGAACAAGAAGGTAG    |
| 39718332 F 0-34:G>A-34:G>A | TGCAGTGCACAAGTCGAATCAAAGCTATATTTGGTATGGTTGGAAATC<br>TTATTCAATATCCTACAAC      |
| 39713728 F 0-51:A>G-51:A>G | TGCAGAACTAGTCTGCAAGTTAGACTGGGAGGCAAAAACCTATGGCTTTA<br>GAATCTGAAGAATTGCTGAA   |
| 39713820 F 0-39:A>C-39:A>C | TGCAGAAGATGATAACTCAAACCACGCAACTAAACAATAGAGGTAGA<br>CAAGATTGGAGAAAAATGAAC     |
| 39714537 F 0-6:G>A-6:G>A   | TGCAGAGCTTCGTGATCGGTTTTCTGACATTCGCTTTGTTTCGTTTGTCTAC<br>CATAAAGTAATTTCACTT   |
| 39720442 F 0-33:A>G-33:A>G | TGCAGGGCAAATGCATCACTGATGCAGCCTTTGATTCTCTTAC                                  |
| 39723235 F 0-10:G>C-10:G>C | TGCAGGATAAGTTGTTATCGATTGCCATCTCTGCCCTACAACCTGCATA<br>TGCTCTCTCCAATTGATAA     |
| 39727162 F 0-15:C>T-15:C>T | TGCAGGGATTGATTACGAGTGCCAGAAAATTGTAAGAAGTTTTTTATTTT<br>CTTAC                  |
| 39717625 F 0-14:T>G-14:T>G | TGCAGGTTCTACCATTTGATTCTGCTATCAAAAGAAAAATAAAATTGAG<br>AAAGCTAGAAAATAACTCG     |
| 39715510 F 0-47:A>G-47:A>G | TGCAGCAGATAAGATCAGACTCCTATTTACTGAATGGGATAGGAAACAT<br>ATTTGTCTATATAGACACAC    |
| 39721835 F 0-35:A>C-35:A>C | TGCAGAGGAAGGAATTGTGCAGAGGCCACATTCTTATCCACGTGTCGAG<br>TAAGGAAATATCCAGAATG     |
| 39713306 F 0-10:G>A-10:G>A | TGCAGTGAGGGCGTGAGTGAGGGGCGGAATTCAGAAGGGTGATCAAGG<br>TGGGAGGCGGAGCGCCCGG      |
| 39713647 F 0-50:G>A-50:G>A | TGCAGAACAAAGCAAGAGAGGGAATGCCATAAATGATAATAGATATGA<br>AGGAACAGTTTCATATGGCTA    |
| 39713709 F 0-29:C>G-29:C>G | TGCAGAACCGATGAGATAATATAGAGAGACAACATTGCATTGCATATGA<br>CAGAAACGCATCCAATAAAG    |
| 39713610 F 0-22:A>T-22:A>T | TGCAGAAATGAATTATTGGCGAAGGAGAAACTCAAATGCTAAATAAATA<br>TCTTTTTCTGTTTCTGTGGG    |
| 39717529 F 0-45:A>C-45:A>C | TGCAGGTGATCTTTTTATCTTACTTAGGGTGATCCTTATTCTTTTATATTC<br>AAACTTTGTAAAATGTAC    |
| 39721587 F 0-36:G>A-36:G>A | TGCAGACATCAACTGCTCCATCTAAATTGCAGAGAAGCGTCAGAAAGGA<br>AAATCCAGTTGATTTTGAGG    |
| 39716623 F 0-64:G>A-64:G>A | TGCAGCTTGGGTCAACCACTTCTGAAAAGACAAGGAGAGTTTGAAGAT<br>GAAAAAGAGAAAGCCGCAGA     |

|                            |                                                                             |
|----------------------------|-----------------------------------------------------------------------------|
| 39713957 F 0-53:A>G-53:A>G | TGCAGAAGTTTGCTTGAGAAGCATTAGTATATAGCTCGAAACTTCGAAA<br>GAAGAGTTCTCGAATCTCGA   |
| 39716747 F 0-20:G>A-20:G>A | TGCAGGAACAAAATGCGGCCGAATGAAGGACAAGGAAAATCTTTACAA<br>TTGCCCAAATGGTCTAAATT    |
| 39718478 F 0-61:A>C-61:A>C | TGCAGTGTACATGCACCAAGTTATAACTAGAGAAGGCAAGTAGAACT<br>CTCCAGAAAACCAAAAAAAG     |
| 39722720 F 0-24:A>C-24:A>C | TGCAGCCTCGACAAATCTTTTCTAAAGCTTCTGTTGCTTTGGCTGACTTT<br>ATTTGCTTTTCTACCTTG    |
| 39724323 F 0-44:A>G-44:A>G | TGCAGTTGCAACACAAAAGAGGGAAAATCTCTGGATTTCGATCCTAAGTG<br>TTCACCCACCCATGCAAAAT  |
| 39721180 F 0-20:T>C-20:T>C | TGCAGAAACGCCTCCACCCTGTGTATCATATTACCTACAGGCTCGTCCA<br>GCTACAAAAACGCCTCCAC    |
| 39722591 F 0-31:C>G-31:C>G | TGCAGCCAAGATTGACTCTTGAAGATGCCTTCGGACAAAAGGGGAAAAG<br>CAATAAGTTTTCAAAAAAAA   |
| 39713720 F 0-28:C>T-28:C>T | TGCAGAACGCATGTGTTTCATATGTATCCAGAATTATTCTTGTTTCCCCTC<br>AAACATCAACTTGGCTTG   |
| 46755830 F 0-39:G>A-39:G>A | TGCAGTCTCCTTTACGAAATTTGTGCTGATTCAAATAAGTGAGTGCTATTA<br>TTTGAACCTTTCCATGCACT |
| 39722450 F 0-26:C>T-26:C>T | TGCAGCAGCTAGGTTTGAAGCTGCTCCTCTCTCATCATCAATTTGAGA<br>AGTTCAATCCATCTCTAA      |
| 39718315 F 0-48:T>A-48:T>A | TGCAGTGTATGGATTCTAATAATATATAGCTTAGATGTAAAATGTAGAAT<br>AAAGCCAACATATGCAGCCA  |
| 39728759 F 0-38:A>G-38:A>G | TGCAGGGAAAAAATAGAATGGGTCTACATCGATGCAGACTTGTGTCTGA<br>CATAGATCCCAATTAC       |
| 39715010 F 0-25:A>G-25:A>G | TGCAGATGGAAGAAGAAAGAGAAGCAAGGCGTAAAGCGGAAGAGAGAT<br>CCATAGAGTTGCAAAAAACAAA  |
| 39724964 F 0-8:T>C-8:T>C   | TGCAGCCATTTTTTCTCTCAAGACCTGAAAGTTGAAATTGGCATTAC                             |
| 39718124 F 0-54:A>G-54:A>G | TGCAGTCGAAGCTGCAAAATTGGGCGAAAAGGAAACCAAGGGAAAGTTT<br>CCTTCAAATAATTTCTTTGC   |
| 39720546 F 0-25:A>C-25:A>C | TGCAGTTTTATTTCACTAATAAAAGAACAGTAAATTAC                                      |
| 39723847 F 0-63:T>G-63:T>G | TGCAGTATACGTATTTTTTGTGTATGTTTTATTGCAAACCTCTAAAAGAC<br>TACTCGTAGAAATAAAAG    |
| 39713424 F 0-12:A>C-12:A>C | TGCAGAAAAGAAAATAAAAAGGGGGACAATTGGCAAGAACCATACTTA<br>TGACAAGTAAGTAGTATAGAC   |
| 39723254 F 0-15:T>G-15:T>G | TGCAGGATGAAAAGGTACTTTTCGGCACCAAATAGTTGTTTCTCCCCCTCT<br>CTATGGGAAGAAAAATTTCT |
| 39714926 F 0-57:T>C-57:T>C | TGCAGATCTGTTGAATTCCCCAAATTCCGATATAAACCCATCAACGTACC<br>ATTTGCTCCTATGATTTT    |
| 39728903 F 0-68:C>A-68:C>A | TGCAGCTGTCTATGAGGCAAAAGAGAGAATATTCAAATAGCATCTTCAA<br>TAAAAAATAAATAATTAGAC   |
| 46756920 F 0-53:C>T-53:C>T | TGCAGTAAATAAACACCTTGGTGAAACAAATATGAATGCCAGGAGAAGT<br>AGGTCGCGCACAATATTTCAA  |
| 39713419 F 0-16:G>A-16:G>A | TGCAGAAAACCAAACCTGCTAACCTTGCAATTGTCAATCTTCGTAGGAGG<br>TAGGTTTCTTCTTGAAGTGT  |
| 39717127 F 0-63:G>T-63:G>T | TGCAGGCCCATTTATGTCAGCGCAGTCCATTTTGGGAGCTTCATCCTGTT<br>TTCTATTGGGCTTGGGCC    |
| 39716899 F 0-37:C>A-37:C>A | TGCAGGAGATTGGTGTATGCGATCAGTTTTCTATTTTCTGTTTACCATCT<br>GTCATTTTGTACATTCA     |
| 39715727 F 0-65:G>A-65:G>A | TGCAGCATGAAGCAGGACCATCCTGATCCTGATGTGACGTTCAAACCTC<br>AAAGTAAATATCAATGGCAG   |
| 39721576 F 0-30:T>C-30:T>C | TGCAGACACTTGATGGGAAGACTCCACAACCTGGAAGAAATCAAGAACG<br>AAACCCAAGCCAAGATCCCT   |
| 39719685 F 0-29:A>C-29:A>C | TGCAGATACATAGGGAATCTCCCTACATAAGGGCAGTCAAAGTTTTTTTT<br>TAC                   |
| 39716593 F 0-43:G>T-43:G>T | TGCAGCTTCTATAACAAGCACCAGAATCATAATTGAGAATTGCGCAC<br>ATGATTCAACTAATAAGGGG     |

|                            |                                                                         |
|----------------------------|-------------------------------------------------------------------------|
| 39717103 F 0-43:G>A-43:G>A | TGCAGGCATTGAAGTGACCAGTGTAGAATTTGAAGGAAATGGAGATATTGGAGATGAGGAAGAACAGTT   |
| 39714725 F 0-58:T>G-58:T>G | TGCAGATAAAAACGAGAACACAAAATATGGAAACATCAAGGCGCAAATCTACAATGCATGTTAC        |
| 39725844 F 0-8:C>T-8:C>T   | TGCAGATCCACGGTCTAATATGAGTACATGTTCTACATTGGGCTCCGCAGGTCCACGGCCTTATATTAC   |
| 39713915 F 0-44:T>G-44:T>G | TGCAGAAGTAAATAGAGTTGGAGGAGATGAATTTTCTGGAGTTCTTATGAATTACTCATCTTTTTTCAGT  |
| 39725134 F 0-27:A>T-27:A>T | TGCAGGGATGTTGACATCCTCGTTTTCAAATGCCTTCTTTCTAACAAGAACTTAC                 |
| 39715640 F 0-23:C>T-23:C>T | TGCAGCAGTTGGATAGCCCTTTTCGGCCCTCTTCTGCGTCGGTCAGAACTGCGGTTAGTTACTGTAAAT   |
| 39715060 F 0-65:G>A-65:G>A | TGCAGATGTTGGTCAAGTATGTAATTAGGATAGGTGAACTTTGTTTTGTGTTTTTTATTAGGATGACC    |
| 39714715 F 0-55:C>G-55:C>G | TGCAGAGTTTCATTGGTTATTCCTTGTCCTAACAAAAAGAAGACATGCACCAACACTACATGCACCCCA   |
| 39714584 F 0-26:T>C-26:T>C | TGCAGAGGCTGAGATTTGCAAAGAGATTAGAATAGGAAGCAGAGATAATTCTATTATTCTAAGATAGTG   |
| 39721245 F 0-31:T>A-31:T>A | TGCAGAAATTCCATCACAATCAATTGCTACTCAACAAGAATCGTTTTTTTTCATTTGGTTGGGTGG      |
| 39713341 F 0-43:A>G-43:A>G | TGCAGCTGACTCGACCCAACCCGAAAAATTTATACCTCTCACTAGATTAGTTGTTATAGTTTATTTTGC   |
| 39718156 F 0-52:C>A-52:C>A | TGCAGTCTATGCTGGAGCTAACTTCCGCAAGCCCGTTGAACCGTACTAGATCCTGCCTGGTGAATGGTG   |
| 39720196 F 0-16:G>T-16:G>T | TGCAGCTGCATTTTCTGGTGTTAC                                                |
| 39718039 F 0-12:G>A-12:G>A | TGCAGTCACTTCGCTGAATGCAACCCATGCTTGCCCTCGAAGCCTTGGTGTCTTCAAGGCAACAACATC   |
| 39713417 F 0-64:G>A-64:G>A | TGCAGAAAACACAACCATCTTGACACTCCTCTTTGGAGAATCATAAATTAGCTGCTCACTCTTGATC     |
| 46764225 F 0-37:C>G-37:C>G | TGCAGCTTTTACCTGTGCCCTTCCAATTTCCAACATGCAATCTCATCTCACCTCTTATAGTCTAATTTCT  |
| 39720235 F 0-32:T>C-32:T>C | TGCAGCTTGAATGACTAAACAGAACGCAATCATAAAAGGAGTTTCGATTAC                     |
| 39716209 F 0-6:G>T-6:G>T   | TGCAGCGTCGGCTCAGTAAGATCGTCCGAACCAAATTACAGAATTATATTTGCAAAAGCAACTGAAAA    |
| 39722140 F 0-39:T>C-39:T>C | TGCAGATTAGCACAAACGTCATGTGAAAAGTTAGGCATATAGGGGAATACAAGACCTTGGCAAAGGAAA   |
| 39715653 F 0-19:C>G-19:C>G | TGCAGCATAACTTGAAAATCTGTTGTTCCAAAACATGACATAAGGAATCCCTGCACAATGATGATCTG    |
| 39713701 F 0-26:A>G-26:A>G | TGCAGAACCAGCGTTTTGAACTTTCCAAAGGGTTAGTTTTCAATTTTTTTTAGTTTTGGTTTGATTTTT   |
| 39716772 F 0-60:G>C-60:G>C | TGCAGGAAGAAGTCAAGCAATCCAAAGAAGTAACAGTGGAATGAAAACTTACTTTTTTGCATAGAAA     |
| 39713280 F 0-34:T>C-34:T>C | TGCAGCCATGCAGGTAGGCGTTTTCTGTATTATTCTGAACTTTATTCTTTTTTACTTTTTTACTGTTGAT  |
| 39714173 F 0-8:T>A-8:T>A   | TGCAGACATCTTGGTCCAAGTCCGCTATAAATTTGCTTGCCCTGTCTACCATAAACGAGCAGCCCT      |
| 39715311 F 0-5:C>T-5:C>T   | TGCAGCAACTGAGCCTTTGCATGTGGGAGGAACCATTTTTTGCCTTTGCTTGTATGCTGCGTTTTCTTC   |
| 39714875 F 0-57:G>A-57:G>A | TGCAGATCATATTTATGAAAAATATCTAATAGTTATTATTTGAAGTAGTTTGCTAAGGTAAGTACTTTT   |
| 39713757 F 0-16:A>G-16:A>G | TGCAGAAGAAAGTTTCAGGACTTAGATTCATGTACTCAGATTCAGACATTAGCAAGGCCATGCACAAT    |
| 39724475 F 0-49:T>C-49:T>C | TGCAGTTTTGTTGACAAAGATATTTAGAGCAATACCTGCTAACTTGACTGGTCCACCAATTTGATTTA    |
| 39728903 F 0-66:G>A-66:G>A | TGCAGCTGTCTATGAGGCAAAAGAGAGAATATTCAAATAGCATCTTCAAATAAAAAAAAAAAAAATTAGAC |

|                            |                                                                             |
|----------------------------|-----------------------------------------------------------------------------|
| 39713580 F 0-7:A>G-7:A>G   | TGCAGAAAAGTTTGTGTATATCAGTTATAGTACAGTATACTTGAATTGCA<br>TACCAGAAAATGAAAATGG   |
| 39728654 F 0-17:C>T-17:C>T | TGCAGAAGTTTGA AATTCGATTCTTAGCTCTTAC                                         |
| 39713718 F 0-27:T>A-27:T>A | TGCAGAACGATGGAACCTATGGAGTTTTTTTTGTCCAAAAGTAACCCGTT<br>TATCTAACAACGGATTGAA   |
| 39717602 F 0-22:C>A-22:C>A | TGCAGGTTATGGCGGCGAGAATCTCCGCCGTGATTGTATTGGCATTGGTG<br>AGTTTGGCCACCGTTGATG   |
| 39720117 F 0-25:C>G-25:C>G | TGCAGCGTGTCCATGTCGACCTGTCCAAGAGGACCTGGATTCAAATTCAT<br>ATTTAC                |
| 39717633 F 0-25:C>T-25:C>T | TGCAGGTTCTGTATGAACTAATGCACGTTTTCTTTCATTGATTTAGTGAA<br>ATAAGTGAAAGACAACGTG   |
| 39715823 F 0-20:T>G-20:T>G | TGCAGCCAAGGCATATGGTATATATAAAAAAATGTGAGAGGAAGTACAA<br>TAAGATTTTTTACGATATT    |
| 39716182 F 0-52:T>C-52:T>C | TGCAGCGGCTGCTGCCGTTTACTACGATGCGGAGAGTGAGTACCTTTTG<br>GGTGTTCGGTATAACGTGT    |
| 39718004 F 0-38:G>A-38:G>A | TGCAGTCAAATGCTCTACCACTGAGCTATGAACCCTTTGTTGTTTTGAAA<br>CAAAAAAAAAATAATTTTT   |
| 39722371 F 0-60:C>A-60:C>A | TGCAGCACGTTGGTATCTAAGTGATGGAGATATCCAATTCCCAGGTAC<br>AAGGGTCCACTCCCATTGAC    |
| 39718378 F 0-39:T>C-39:T>C | TGCAGTGCTTTTTTGCATCCTTCTCCATTTCAATCAATCTGGGTTTCAGAA<br>AGTAGTCTTCTAACGAGT   |
| 39723476 F 0-41:G>T-41:G>T | TGCAGGGCTCTAACTTTTCTGCATGTTTGTCTTATTTGGGTTTTTTTTTC<br>AGTAAAGGGGTCTCCGG     |
| 39714014 F 0-29:G>A-29:G>A | TGCAGAATCGTCTCAGCTAGACAGACTAGAGACTAAAACAAGATTCTG<br>CAATTTGTTTACCACATAAA    |
| 39729189 F 0-14:G>T-14:G>T | TGCAGAAGTTTGAAGAACAATACTATATGGAGTATTTGGTTTGAAAGAGA<br>CCAAAAGAAGCTTTTACAGA  |
| 39714017 F 0-42:A>G-42:A>G | TGCAGAATCTCAATCAGTGTTTCATCCTGATCCCATTACCACTACCAACAA<br>GCTTCAACATTTCAATTCC  |
| 39714376 F 0-46:C>A-46:C>A | TGCAGAGAATGAAATGCTTTCCCTAAAACGAGCAGGACAACGAAGACTC<br>TGATAGGAAAACTAGAAGA    |
| 39714325 F 0-65:T>A-65:T>A | TGCAGAGAAAAGGAGAGAATTGAAATGGAAGTGGTATGTGTAGAAGAA<br>GATCAAATTTCAAGTTTTGAA   |
| 39714380 F 0-36:C>A-36:C>A | TGCAGAGAATTCTTAGAACTACAATGTGGGGTGTGCAGAAGGAGTTAC<br>CGGGGATGGTGGCTTTGCTT    |
| 39716187 F 0-5:C>T-5:C>T   | TGCAGCGGGAGGTTTTTTTTGAATTTTATTGGAGTTTTTCGTGGATTTTATCG<br>CGTTGGAACGCGAAGGTT |
| 39716184 F 0-66:T>A-66:T>A | TGCAGCGGCTGGGGGAGAGCGATGATCCTGGAAATCTCCTCTGAATAGT<br>GTCTGTTGATTTTACTGT     |
| 39715101 F 0-27:T>C-27:T>C | TGCAGATTCCACAAGGATTGTTCTGCATTTTTAGATTGTTTTTCTGGCTCA<br>GTTATAATTGTTTGAGGC   |
| 39717439 F 0-24:C>T-24:C>T | TGCAGGTAATCTGTTTCGGCATCGACGGAGGCGATCGATACGAAGCAGAA<br>GAGTGAAGGAGAAGTTTCT   |
| 46754969 F 0-17:C>T-17:C>T | TGCAGCAAAAAGCAAAGCCCAATGGGGTCCGCCACTGCGAAGCTTTCTG<br>GCAAATTCGCCCTTTGGCGT   |
| 39729406 F 0-53:C>T-53:C>T | TGCAGAAGAAAGCACCATTTCAATAACTCATAGCTAACCCAGAAAAGCGA<br>ATCACCTGGCTTTTAC      |
| 39715526 F 0-6:A>T-6:A>T   | TGCAGCAGCAAACCTCAGCATCAGTCACAGCACAAGCAAGCAGAGAAAG<br>GTAGTTTGTATTTGAAGCCTG  |
| 39715096 F 0-33:T>C-33:T>C | TGCAGATTCAGTGCAAGGAGATCAACTCATTTATGCGGCTGCCTATTTCA<br>ACATCTTGACCACAAGCAT   |
| 39721738 F 0-35:T>A-35:T>A | TGCAGAGAGAAACAAGAAGAAGAAGAAGAAGATGGGTTTTGGTTG<br>GAGGTTGCAGAGAGAAAAAGA      |
| 39718585 F 0-58:C>G-58:C>G | TGCAGTTATCCTGTCTATGTTCTTCTCCGATGGACTGTTGAGATTCTGAGT<br>GCCTGGTCTATGGAAGCTG  |
| 39719363 F 0-18:G>A-18:G>A | TGCAGAACCAACCACCACGTCATTAC                                                  |

|                            |                                                                            |
|----------------------------|----------------------------------------------------------------------------|
| 39722868 F 0-20:C>A-20:C>A | TGCAGCTAGTATAGGACATACTTTTCTGTTCACTGTCTCCTCTCTCACCAA<br>TATTATTCAGTTTCATCA  |
| 39714320 F 0-21:A>G-21:A>G | TGCAGAGAAAAAATATATCAATACCAACAGGGAACAATATGATAAA<br>CCAAATGTGTGGTATGTA       |
| 39726970 F 0-30:G>A-30:G>A | TGCAGAATGCAGATGTTATATGGGAAAGTCGTGAAGATCCAATATGGAT<br>TAC                   |
| 39716213 F 0-60:C>A-60:C>A | TGCAGCGTGGGATTTGAACAGCTCTTTTCTTGTCTAACTTAGAATTCAG<br>GCTGATTTATCGTTGAATT   |
| 39724447 F 0-56:T>C-56:T>C | TGCAGTTTGTTCATCGGTGCTAACCTTCAAAGGGTAAGAGACCAAATACC<br>AACTTGATTTTCCTGCTTAT |
| 39714484 F 0-31:T>A-31:T>A | TGCAGAGCAACTTCTAAAACCAAACTGAACTCTGAAATATATATTTGTT<br>CTGATGAGTAGAGAAAAGAG  |
| 39714603 F 0-9:G>A-9:G>A   | TGCAGAGGGGTCTGGAATTTTCTCCACCAAATCAACATTTGAAAGCTTTG<br>CCAAGCAAAGGCCAAAAAT  |
| 39714931 F 0-62:T>C-62:T>C | TGCAGATCTTATCTTGGTAAGTAGTTGAGGACTTCTTTCTCTGTTTTTCTT<br>TATGCTCATTTTTCCTTT  |
| 39719921 F 0-5:C>G-5:C>G   | TGCAGCACCTGAGGACTAACAACCTTGCGCTTAC                                         |
| 39713557 F 0-20:C>T-20:C>T | TGCAGAAAGGCACAAATTGACAAGTGTGTATTTCTTATGCATGAATGCA<br>TCAACCCACAAATGAATTGA  |
| 39726320 F 0-14:T>C-14:T>C | TGCAGCTTACTTATTTACATGTTGAGTTCCTCGTTTCTAGATTGAAAATC<br>ACGTAAATAACTTGATGC   |
| 39718841 F 0-8:A>G-8:A>G   | TGCAGTTTAGGCAATAATTTTATAAATCCATGTCCAAGTATATTTTTTATT<br>ATGCACATAAAAATAAATA |
| 39713543 F 0-27:T>C-27:T>C | TGCAGAAAGATGTGGCCGCATGGCTGTGAGTCTCAGGCAGAGCGTGTG<br>AACTGTGAAGAATGGTGGTA   |
| 39716186 F 0-65:T>G-65:T>G | TGCAGCGGGACTTACAATTCACGAAATAGTCCCTTTTGTGCCATTGCC<br>AATCTTGATGATGATTGAT    |
| 39721758 F 0-36:T>A-36:T>A | TGCAGAGATATGAGAAGCTTTTCTAGAGTTGTTTCTTCTAAAACATCATT<br>CTTCATCTCAAATTCGTC   |
| 39713510 F 0-45:C>G-45:C>G | TGCAGAAACGACCTGGAGCGGATACGCATCATCATTCAATTTGGCTCTCTA<br>GCATACCATTTGCAGCATT |
| 39716553 F 0-33:C>A-33:C>A | TGCAGCTTCATATTATTTCTGTTCCCTAATAATACATGTGATATTTTAGTAG<br>GATGGTCTGTTGTTGTCT |
| 39716475 F 0-36:A>G-36:A>G | TGCAGCTGGGCTTTCGGCTCTCGAATTGCTGAAAACATCTTCTGTTGATA<br>GTGAGTATTGAGATGAATT  |
| 39720257 F 0-21:C>A-21:C>A | TGCAGCTTTTGTTCATAAAAGCAAGTAGGAATCTCTTGTTAGATGGAAAA<br>TAGAATCACCCAGATCGGA  |
| 39720363 F 0-53:C>T-53:C>T | TGCAGGATGTAATGCTCTCTCAACTTCTAGCATAGCAACTTGTTATGAC<br>TTACCTTAC             |
| 39721893 F 0-29:T>A-29:T>A | TGCAGAGTAAGTATGCTAAGTCGGGCAGCTAGGTTTTCTTCTGAAACTCA<br>TATGAGACATAAGATAAGA  |
| 39723165 F 0-41:A>T-41:A>T | TGCAGGAATGTAATTGAACACCCTGATGAAATGAAATACAGAAAGCTTC<br>GCAAGGCACGACTATGAACT  |
| 39724770 F 0-49:G>A-49:G>A | TGCAGAGTGCTTGAAAACCCAACAGTTTTGGGGTATTTTCATGCCAATAG<br>CTTAC                |
| 39718397 F 0-44:C>T-44:C>T | TGCAGTGGAGGCCTAACATTATCCCTCTGGACACCTTGTCCCTACGATAA<br>AATTTTGAAATTGGTGT    |
| 39713576 F 0-6:A>G-6:A>G   | TGCAGAAAGTTGAGAAGGCGCGCATTGATGATAGGGAAGAAGACGCT<br>AGCGAGCGCGGAGAGTTCAG    |
| 39717922 F 0-6:A>G-6:A>G   | TGCAGTATAAAGCAATGGATCTCAGGGAAAGTCCAATGGACAACCAAG<br>GTGTA AAAAAGACACAGAAG  |
| 39716474 F 0-66:T>G-66:T>G | TGCAGCTGGGCTGGGCTCATCAAAATTGTCCGACTAATGGAACAATGAG<br>AAAAGGCCTGTCAACAGTAG  |
| 39726072 F 0-57:G>C-57:G>C | TGCAGCATAACCAAATATGATGTTTAGAGCCCATATGCACCATGTCCGA<br>TCGAATGAGTTACACAACCA  |
| 39716567 F 0-46:A>G-46:A>G | TGCAGCTTCGATCGCAATGAAGGGTAAAGGGAAAGAAAAATCAATAA<br>ATAAACTATAAAATACAAGCC   |

|                            |                                                                          |
|----------------------------|--------------------------------------------------------------------------|
| 39721072 F 0-63:A>G-63:A>G | TGCAGGTACCTCTGCGACAGTTACTAAGGAATAGAATTCCTCCTTGGCATCTTCCTCGTCGTTACGCTT    |
| 39716042 F 0-53:T>C-53:T>C | TGCAGCCTCCCTCCTAGCGGTTTTGCACTTATTTTCTACTCTCTGTTACGGGTATTCTCCCAATATCC     |
| 39725133 F 0-6:G>A-6:G>A   | TGCAGGGATGGTTTCGAAGGGTGGTTGGATTAC                                        |
| 39714056 F 0-19:T>C-19:T>C | TGCAGAATGTGTCTACATTTGGAAGGGCAGAGGTAAAAATGTAECTTCTAGAAGTTATTTATTGTAGTT    |
| 39718251 F 0-36:G>C-36:G>C | TGCAGTGAAGCGGCGGAGCTTAGAAGAAGGGGAAGGGGTAGAATGGGAATATGGGAATTGGAGAGGG      |
| 39713856 F 0-31:A>G-31:A>G | TGCAGAAGCTTCTCGGTTCACTTATGCTTGAGTATTTAGTGTTGCAAAGAGATCTTATCCCTGATCCA     |
| 39725085 F 0-38:T>G-38:T>G | TGCAGGATCAAAGCAAATTCATCTCATGTGAAACACTTTTTTTACTATGTAATTAC                 |
| 39715396 F 0-23:C>T-23:C>T | TGCAGCAATTGGATTGCACATAACAACAACCTTCAATGAGCAATACTTCAATAAATCATTTGTTGTTGAC   |
| 39716091 F 0-60:C>T-60:C>T | TGCAGCCTTGTCGAGATCGCTCGTCTTTCACGAGAGCTCTTGAAGGCGTCGATCGTCATCGTCGTCGC     |
| 39717243 F 0-43:C>A-43:C>A | TGCAGGGAAACAACCTTCTAAAGGGAGAAAAAATCAGTAAACCAAAA AAGAAAGGCCAAAACAGCAAC    |
| 39726639 F 0-51:A>C-51:A>C | TGCAGTCAAATGCTCTACCACTGAGCTAAGGACCCATTGTTGAAAGTAAATATCGCCTTACCTTATAA     |
| 39713590 F 0-65:C>T-65:C>T | TGCAGAAATATTGAGAATAGAATTACTAAAAGTGAGGTATCTATATTTG AATGTAAGATTTACCCCTC    |
| 39718191 F 0-46:A>C-46:A>C | TGCAGTCTGCTGATGGCTCCGAAGAACCAAGACCAAGAAATCTTCAAG CAATGCTAAATCTGCCCTT     |
| 39722402 F 0-9:C>T-9:C>T   | TGCAGCAGACCCGAACCGGACCCGAAAAGAAGAAGAAAAAATACTGCTGCTGCTGGAATTAC           |
| 39722931 F 0-59:G>C-59:G>C | TGCAGCTCTTTTTCTACTGAAGAAATTCTAGTCATTAGTTGATCTAGTGC CTCCTCAGCGACAGAAGGG   |
| 39720335 F 0-5:G>A-5:G>A   | TGCAGGAGTTACCGTCGTCGTTAC                                                 |
| 39715838 F 0-17:C>T-17:C>T | TGCAGCCACAGAATCTTCTTTTCTCCTTTTGAATGGGGAAAAGACTGCC TAAAGCCAAGATAATGATC    |
| 39714485 F 0-68:G>C-68:G>C | TGCAGAGCAAGAACAGCACGTGATGTGCGAAACGTGAAACCTTCTTCT TTGCAGAATCAGAATGAGAG    |
| 39714664 F 0-56:A>T-56:A>T | TGCAGAGTCCCAATAATTATCATTTTTAGCTTGTCTCTATGAAGTGGATAT ATATATATTTTAC        |
| 39725299 F 0-43:C>T-43:C>T | TGCAGTGACCACCATAACAAGTTCACATTGCGAACACGTTGAAACCTTTTAC                     |
| 39714261 F 0-33:G>A-33:G>A | TGCAGACTAACCAACATTGCACCAAATGAGCTAGCACCCAAAACCTTGTT TACTTGTACTGATGTAGTTC  |
| 39717792 F 0-56:A>T-56:A>T | TGCAGTAATGAATCTATAGTTGTACTGTAATAATGAATCTGAGATTATTA CTCTCAATGCTGGAAGGCT   |
| 46760763 F 0-28:G>A-28:G>A | TGCAGAGAATCCCATTCCATTCTCCACAGAATTTAC                                     |
| 39717756 F 0-44:A>G-44:A>G | TGCAGTAACTGTCCTTAGCATTGTAAGTTCACCAGCAAGTTTGACATTT TCATAAGAAAGTTTGGTCA    |
| 46760720 F 0-12:A>G-12:A>G | TGCAGAAGATAAAATATCCTCCCAAATTTGAGAGAGGTTAC                                |
| 39715929 F 0-45:C>A-45:C>A | TGCAGCCCAGAACCAAAAAGCAGAATGGAGGCAGTAACTGGAACCTACGA TGGCTACAATTGTCACCGTGC |
| 39718862 F 0-30:C>G-30:C>G | TGCAGTTTCAGGCCACAAGCCCAACCCAGCCTTTCATGTGGAAGTTCTT CGTTCCATTCTCTCCCTGT    |
| 39722135 F 0-23:G>A-23:G>A | TGCAGATGTTTCACTGAAGAAAAGTGATAGTCTAGTTATTGCTCTAAGA GTTTGAAGTGATACTTAGT    |
| 39722480 F 0-32:A>T-32:A>T | TGCAGCAGTGAATTAGGCATGGAACAGTGTGATGCGGTGACAGCAACA GAAACTTTGCGCACCAATGT    |

|                            |                                                                        |
|----------------------------|------------------------------------------------------------------------|
| 39721527 F 0-25:C>T-25:C>T | TGCAGAATTGGGGCGGTGCTGTACACGAAAAAAATCTTCTACCCCAAG AAGGTAAGGTTTGGAAAGAA  |
| 39714022 F 0-29:A>G-29:A>G | TGCAGAATCTGTTAGTAATGAGTTGAAGGAAAACCAGAATAAGGGGGCA TTGGTTCTTGGGATTTACT  |
| 39725785 F 0-17:A>T-17:A>T | TGCAGAGGTAATGATACAAATGCAATTCAAAGCTACTGAAATTGGAAC ACTCGTCTACATTCAAAGTA  |
| 39718066 F 0-52:T>A-52:T>A | TGCAGTCATGTGTGACCAGCCTTTGAATTGATTCCCACAATTTATTATTA TTTTTCTTTTTCTTTTTT  |
| 39727057 F 0-16:A>G-16:A>G | TGCAGCAAAGGCCGGCAAACATCTCCTTCATGGCGCGACGGTGCAGGC GTTGATTAC             |
| 39722976 F 0-39:G>A-39:G>A | TGCAGCTGCTTCTGCACAAAGCGGAGTGGTAAAAACCTGGGAAGATTTT GAGTGGACCACCTTGAGATT |
| 39725525 F 0-30:A>G-30:A>G | TGCAGAACTTTTGCTCGAGTCGAATCTATAGTTATAGCGATGTGGCGAA ATCTCTGTGGGAACTGAAG  |
| 39715699 F 0-46:G>T-46:G>T | TGCAGCATCATTAGTGTGTCGTTACGATCAGATCGGCACGACAGTGAT AATTTTTCTTTGGTTTTTCGA |
| 39723415 F 0-6:T>C-6:T>C   | TGCAGGTTTGGAGGATGAGGGAGTGGAAATTTTGAAGAAGTGTGAGGAC AAATTGGGAATTACTCGTCG |
| 39723790 F 0-66:A>G-66:A>G | TGCAGTACGACAGTTTTATATGATGCATAGCCAGCAAAGCAGAGGCTT TATGTAGCATGTTTCTCAGA  |
| 39723805 F 0-38:G>A-38:G>A | TGCAGTAGAACCGGTTTTCTGTATATATAAATCTTCTCGCAAGGTTTCTC TGCCTTCTGCCGCAGCCTC |
| 39722117 F 0-32:C>G-32:C>G | TGCAGATGGTTTCCAAGAAGGGAGGATATAACCAGCAGCAATGACAGA AAAGACAGAATAGTTAGATTA |
| 39718904 F 0-47:G>A-47:G>A | TGCAGTTTGATGATTGGCAGATTTCATCGCTGGACAGAAAGCAAATTTGG TAAAAACAAACAACGGACT |
| 39724309 F 0-15:A>T-15:A>T | TGCAGTTGACTGCAAAAAAATAATCTCCTTCAGCCTTTTCCCCTTTTCTC GTCAGATTATAGATGAAC  |
| 39724184 F 0-38:A>G-38:A>G | TGCAGTGTTTATGCATTTTTAGTTGATGTTACTTTACCATGGTTGTACATT GCGTGGTTGTACATTGCG |
| 39724011 F 0-25:G>T-25:G>T | TGCAGTCTGTCAATATTAGACAAAAGCAATTTACATGAGCAAGCATGTC TACAATAGTGATGACTAAG  |
| 39720136 F 0-5:T>C-5:T>C   | TGCAGTTAGTGGACTTGTTGTTCAATCTCTCTCTCTCTCGTTTAC                          |
| 39718494 F 0-27:G>C-27:G>C | TGCAGTGTCTTGACGAACAAATACGAGGCACCATAACATCTCCGTATCTC GGCTTCATGACAAAATACT |
| 39723103 F 0-35:A>C-35:A>C | TGCAGGAAAAAGTGACATCTCTAGTTCTCCTATCCACGACTTTGTTTGAT AAGCATTACATCAGTGTTT |
| 39717358 F 0-31:A>C-31:A>C | TGCAGGGGTATTGTTTTGTTTAGAGTTGATTATGATATTTTGTCTTTGGAT GGAAAAGAGTCGTTGCG  |
| 39725263 F 0-35:G>A-35:G>A | TGCAGTCAAATGCTCTACCACTGAGCTATGGACCCGTTTTTTGCTTATTA C                   |
| 39725362 F 0-12:G>A-12:G>A | TGCAGTTGAGGGGCATGTTTTAGAATGTAATTAC                                     |
| 39728493 F 0-23:A>G-23:A>G | TGCAGTGAATTGTGAGCGAAATGAAAATGAAAAAATATGTGCAACCAA GTTTTAC               |
| 39724795 F 0-21:C>A-21:C>A | TGCAGATATATCACAATTTTCCAATGAACTTAC                                      |
| 39722078 F 0-29:A>G-29:A>G | TGCAGATGCAGAGGTGAAGGACTGAAATCACATTCCCTCATTTCAAGCA CGATGCATTTCTCCAGTTG  |
| 39726147 F 0-67:G>A-67:G>A | TGCAGCCGCCACCGGAGCTCCGATCCCGGAGACCAGCTGCCACTAAGCC TGAGCCACAACCAAGGCAGA |
| 39720535 F 0-29:C>G-29:C>G | TGCAGGTTCTTTAGAGCCACAGATTTGAACTGCTCTACCCTTTTAC                         |
| 39714455 F 0-43:T>C-43:T>C | TGCAGAGATCTATAGTTGTATTGTGTAATTTGATCTTTGTTGTAGAAGA TAAAGGAAAGACTATGTAG  |
| 39725621 F 0-62:A>T-62:A>T | TGCAGAATCCAAGAAAACCTGCCAACACATGTAACCCTAACCCACACTA AACTCTAAACCTAAAATATT |



|                            |                                                                             |
|----------------------------|-----------------------------------------------------------------------------|
| 39725968 F 0-7:G>A-7:G>A   | TGCAGCAGATAGAGACTCTCTCATTCAAAAGACCAACGACCTCGCCACA<br>ACATATATATTTTAGGATAT   |
| 39716430 F 0-65:T>A-65:T>A | TGCAGCTGCCAGCAATGCAAAGTAGAGATTGTTTATAAGAAAGTGATGA<br>AGAAAAAGGAAAAAATCAA    |
| 39716793 F 0-8:G>A-8:G>A   | TGCAGGAAGTTACATGGAAGGAGGGGTCGGTGGATTCATTTACCCTAGT<br>CGACAAACAAACAAAATGA    |
| 39722892 F 0-53:C>T-53:C>T | TGCAGCTCAGTGTGCCGCCGTCGTCGCCGCTTCTTTCCGATTCAGTGCC<br>GCGCTCGTCTTTCTTCCGT    |
| 46755297 F 0-33:C>T-33:C>T | TGCAGCATAATGATTGATGTTAGTGATATTATGCGAACATCATAAACACT<br>CAAGAAAGGAAAAAATCAT   |
| 39718604 F 0-24:C>A-24:C>A | TGCAGTTCAACTAACAACTTGACCGCTCCAGCAATACTTGACATAGAA<br>GTGGTGAAACAAGAAATCAC    |
| 39717180 F 0-18:C>T-18:C>T | TGCAGGCTAATCCGAAATCTGTTGCTACTACTCAAACGTAGGTCAATATT<br>GGGAATGTAATCTTGCAGG   |
| 46754977 F 0-25:T>C-25:T>C | TGCAGCAAAATCGATTGAAGATGCTTCATCGTCAATTCATCATCTTTATC<br>CAATCCAAACTTCAAATTT   |
| 39715035 F 0-35:T>G-35:T>G | TGCAGATGGTTGAGAATCTCATGGAATTTTTGAGATAGAGAATTTTTGGG<br>GAAACCCAAATGAGAAAA    |
| 39718567 F 0-50:A>G-50:A>G | TGCAGTTAGCTCGAGTAAGTAATCTTCCTTAGTTACCACCTTCACTGGCG<br>ATGCTTCTTCTTCTTTGTT   |
| 39714051 F 0-49:C>G-49:C>G | TGCAGAATGTAGGAACGATATAAGAGATCACTCTAAGGTTGCTATCACA<br>CAGAATCGAATTCGGTGCCT   |
| 39716652 F 0-56:A>T-56:A>T | TGCAGCTTTCACTTTCAGATCTCATAATATTATATGATCCCTTGCCGCCCT<br>TGTTTCATGTTTCATGTTCA |
| 39716839 F 0-25:C>T-25:C>T | TGCAGGACACTTTCCTGAATCATTACGTATATCTATAAACTGATGCTGAA<br>TCATTATGTATATCTATAA   |
| 39721300 F 0-48:G>T-48:G>T | TGCAGAACTGACTCAGGAAAGTTTATAAAAGTAATCAAAGAGATACAG<br>AATGAATTTTTGAAAGTCGAG   |
| 39724229 F 0-37:A>C-37:A>C | TGCAGTTATGTCGCGGAGAGGGGTTCTTGGATACCAAATAGGCAATACA<br>CTATTCTCCCCCGGATCT     |
| 39726690 F 0-67:G>T-67:G>T | TGCAGTCTGTAGTATTATTACACTTCTTCTACTATAGAATGGCCAGACTT<br>GGAGTTCTCCCCCTTGTTGG  |
| 39717162 F 0-67:C>T-67:C>T | TGCAGGCGCCGTCGGCATCGGTGGATGACTTCATTGAAACGCAAATATT<br>TCAACACGCCCTGGGCTGCC   |
| 39716353 F 0-22:A>G-22:A>G | TGCAGCTCGCGCCAAAACGTGCACCTCAGAGTTTTGCGAGCGAGGGCAG<br>TAGGAGAAAGAGATTTCTGTC  |
| 39725807 F 0-15:C>T-15:C>T | TGCAGATAACATTACCAACTTCGCATGGAGATTTTTGAAACAGAAATTG<br>AGCAAAACATTTAGATTCGT   |
| 39724401 F 0-42:C>T-42:C>T | TGCAGTTTCAAATCAACTTGAACACTTGAACACGTTACAACAAGCTTT<br>GAGTCATTTGGGTGAGTT      |
| 39716166 F 0-26:C>G-26:C>G | TGCAGCGGCAGAGGGTGGATTTATTCCTACAAAGTTGGTTGTTTCCGATG<br>TTCTTCCACAAATTACGGA   |
| 39718500 F 0-38:C>T-38:C>T | TGCAGTGTGGGTAAAGGTGATATTCTTCTACTTATATTCGTACTACTATG<br>TGAGTTCATGGTGCTTGAT   |
| 39726944 F 0-40:T>A-40:T>A | TGCAGAAATGAAATTGATTACTCTTACGTCGTTTATTAGTTATGTTAC                            |
| 39715599 F 0-17:C>G-17:C>G | TGCAGCAGGATCTGCCGCTAGTCCTAAGAACACTTCTTAGCTGGAATCA<br>CTTGCCAAAAATTCATGC     |
| 39716405 F 0-8:A>G-8:A>G   | TGCAGCTGATCCGAGCTCTTTACTAGATTTTGGTACACCCATGAATAGA<br>AGTCAATTTGTTGGTTCAT    |
| 39717483 F 0-19:A>G-19:A>G | TGCAGGTATTGTATATGCCACCAACAGAGACGGCTGGATCAAACACTG<br>CATCCCAACGGATCTTTGGA    |
| 39727837 F 0-23:T>C-23:T>C | TGCAGTGAACTTGTATCTCAGGCTGTACGAGCATTGTGCAACATCAAATC<br>TCTCCTTTCTTCTTATCG    |
| 39718086 F 0-52:G>A-52:G>A | TGCAGTCCATATCACCTCTCTGTTAGTGATTTACAAAATTTGGACGGCA<br>AGGACCAAAATGCTCCTTA    |
| 39716335 F 0-11:G>A-11:G>A | TGCAGTCCCAGTTGCCAATATCCCAGCCACACTCGGCCCTGTCATTG<br>ATGCAGGTTTGTAAGACGA      |

|                            |                                                                        |
|----------------------------|------------------------------------------------------------------------|
| 39718758 F 0-13:C>T-13:C>T | TGCAGTTGCTAGTCTGTAACCTCATAATTTGTTGGGTCCCAAGAATTGAAAAGTAAAATTTATATTCGTT |
| 39717085 F 0-11:G>T-11:G>T | TGCAGGCAGTAGGGCAGTGGGTGGATGGCTATTTACAGTAACGGTTTACCAATTTACAAAGGATCAAAA  |
| 39723209 F 0-29:T>A-29:T>A | TGCAGGAGGAGAAAATCTGTGTGGCTAGTTGATAAATCTTTCGCTTCGCTTCCAATTGGTTTATCTCA   |
| 39724387 F 0-34:A>T-34:A>T | TGCAGTTGTTTGGTTCCTCTCAAGATGCATTTCTACTTGATTATATAATAAATGTCAAGATAAGTGC    |
| 39724084 F 0-38:G>A-38:G>A | TGCAGTGCCCGAGAGAAAGCCACATTGCAGCCATAAGGGAGATCTGTTTCCATGATCTAAAAGTCTG    |
| 39716286 F 0-36:C>T-36:C>T | TGCAGCTATCGCGCTCTAAATCTTTGTGCTCTTTGTCCGTGTGTATCTTACATACATTTCTCAATAAAG  |
| 39713290 F 0-60:A>T-60:A>T | TGCAGGTCATGAAGCCTTCTACCAGTGTGAACAAGGTAATAATTTATCCTTATTTATTTATTTATTTG   |
| 39721797 F 0-41:T>C-41:T>C | TGCAGAGCCAGTTTCGAAGATGAAATGCGCAAATTGATCGCTGCCGCCGCGGCGGAGGAGGTGGTCGCC  |
| 39727435 F 0-41:G>C-41:G>C | TGCAGAGAGTAATTCCTTTTTTACCATTTTTTTGAATTCTGATTGAATCAATCTCATTCTCAACATT    |
| 39716482 F 0-14:A>G-14:A>G | TGCAGCTGGTGGACAGTGGTGAAGGGAGATCGTCAAGAGAAGGAGAGGGAGGTAGTGGTTGCTACTTG   |
| 39729252 F 0-42:C>T-42:C>T | TGCAGATCTTGTTCAGTAGATTTGAAGGCTGACTCATTTTCGTGGATTGTTAGTAACTATTAC        |
| 39727041 F 0-26:T>C-26:T>C | TGCAGATTCAAAATTTTCATATTTCTACGATTTTTAC                                  |
| 39721992 F 0-15:C>T-15:C>T | TGCAGATCAAGAGGTCACCGGTTTGAACCCGGTTGGGCCCTCATTTTTATTTTTATTTTTATTTCAATT  |
| 39719748 F 0-29:G>C-29:G>C | TGCAGATGAAGGCTTCTTCTCTTTTTTCATGTTAC                                    |
| 39722168 F 0-39:C>T-39:C>T | TGCAGATTCTTTTCGAAAATGAATGAGAGAACTTTGGCTACTATTCTCTTTTTTTCAGAGTCTTCAA    |
| 39728065 F 0-29:A>T-29:A>T | TGCAGGGGTTGCTATTGGCTCTGTTTTCAAACCGTTTTTCACATTAC                        |
| 39715269 F 0-8:A>G-8:A>G   | TGCAGCAAATGATGGGCAATGGGGCCAACAGCAAGAGCATTGCTCTTATGGTGGCGGCCAAATTTGGTG  |
| 39717925 F 0-16:T>C-16:T>C | TGCAGTATACGAAAAATAGAGCACAAGCAGAGGAGCTGAGGAAGAAGCAAGGCCTGCTTGGCTGCTTGG  |
| 39723600 F 0-47:G>A-47:G>A | TGCAGGTCGTCTTCTTTTGATTCTTTTTGTAATACTGTACAAAATACGACCTCTTGGTGGATTTCTTCA  |
| 39724955 F 0-16:A>G-16:A>G | TGCAGCCATATCTATGATTGATCATGTTGTGTTAGAGGAAAACAATATTAAC                   |
| 39726729 F 0-14:C>T-14:C>T | TGCAGTGCATGTTTCTATTCTTAGATCCTAAATGCCGATCTAATGTTTTTCTCGATGTTTTCTTTGGTT  |
| 39726472 F 0-42:T>G-42:T>G | TGCAGGGGATGACACTTTTGACATTGTCAGCTTCAGTTCTGTGGTTGGTGGAAATGCCATCCAGTTTT   |
| 39715997 F 0-41:C>A-41:C>A | TGCAGCCGCTATGTTCTTACTTCTTTGGTTGTTATGTCTGGCCCGTCTAAGTTTTGGCTGATTATGCTC  |
| 39722249 F 0-64:A>G-64:A>G | TGCAGCAAATAACACATACCAAATTTATTATCAACAGCGATGTTCTATTCATTTTGAAAAACAAAATA   |
| 39729464 F 0-46:A>G-46:A>G | TGCAGGTTTAGGTTCTCAAAGGACCTTCAAAGTTCAATATTGTCTATTAGATTCATGAACCTTACAGA   |
| 39714030 F 0-30:C>T-30:C>T | TGCAGAATGAATGGTCAAAGTACAGAATCTCGAAAAGCTTTGAACTCCGAGGGGGACCCACGAATCCG   |
| 39716069 F 0-50:A>G-50:A>G | TGCAGCCTTACTTTCTTGATTATCAAATTCACACTTTGCAAGATAACCAACAATGCCTTTGTGCCCGT   |
| 39722315 F 0-67:T>C-67:T>C | TGCAGCAATGGAGTCGTTGACCAGAAACGAGCCTTATCAGATATTGTCGGCCTTTGAGTACTGTGTT    |
| 39726106 F 0-14:T>C-14:T>C | TGCAGCCACTACTTTACAGTTTACATACATATTTTACCATGAAACCAGTTTGTCTAAAATTAGAAAATC  |

|                            |                                                                            |
|----------------------------|----------------------------------------------------------------------------|
| 39722664 F 0-10:G>C-10:G>C | TGCAGCCCTAGGTTATCGATTTTCTACTTTTCAAATCCACCCACGCTTCTG<br>TCTTCTTCTTCATCTGC   |
| 39722821 F 0-38:A>G-38:A>G | TGCAGCGGTGATTATCGAACCATTTCGGTTCCCCTTTAGAATCGAAAATCG<br>CCAGTCGAAGTCGTGTGGC |
| 46760984 F 0-12:C>G-12:C>G | TGCAGGGCCATACCCGATGTTCTGTTGAAAGTGAATTAC                                    |
| 39718951 F 0-11:T>C-11:T>C | TGCAGTTTTCTTACTTTTCTTTTTTGTGACTATTTTTTGTCTGTTAGAAACA<br>AAAACCTTAC         |
| 39717321 F 0-54:C>A-54:C>A | TGCAGGGCTGGTATTTGTATTTGTACCATATCTAATAAAAATTCAATAAT<br>ATTGCTAAAATTTGCAAAT  |
| 39716885 F 0-26:G>A-26:G>A | TGCAGGAGAGAATCGAAAGGGCTAAGGCCTTTTATAGACCTGATCTCCA<br>GATTCTCCAACTACCCACCC  |
| 39723379 F 0-5:C>G-5:C>G   | TGCAGCCGTACGTTGTTGCCGGTGAAAACGACCGGTTCAACCTTGTTTCAG<br>GAACCGTAACTTGAGATTC |
| 39713928 F 0-39:T>A-39:T>A | TGCAGAAGTCAAATAATGGAACGTTCAACTCGAATTATTGGTATATAA<br>AATCACATAATAATAGATAT   |
| 39720864 F 0-7:G>C-7:G>C   | TGCAGTTGGGACATAGCGAAAAAAAATCAAGATTAC                                       |
| 46757389 F 0-36:C>T-36:C>T | TGCAGTGGGTCTCGATACAGTCGACGACTGTGTGGTCTTATTGGGGCGT<br>CGAAACGCCGTGGGTTTCG   |
| 39722656 F 0-53:T>A-53:T>A | TGCAGCCCGACGCCTACTATATTTATGGCGGAAGACCTCTCCTGCAATCT<br>GCATTTCAAAAAGACATTA  |
| 39722613 F 0-66:G>A-66:G>A | TGCAGCCAGCTTCTTTGTAAAGTTTTTCTCTGGATTTTTGCTTTGGAGAAG<br>CTAGAAACTTATAATGTG  |
| 39727503 F 0-13:T>G-13:T>G | TGCAGATTCCCATTTTCATCAAAGGCCACAGAGCAACCAACCACCGCAT<br>GGCTTGCTAGAAGCCTTACA  |
| 39721395 F 0-51:T>A-51:T>A | TGCAGAAGGAAGCAATTGCTCTGGAGGACCAATAAAAATTCGTGCG<br>TATGTGTAATATGCTGAGA      |
| 39714846 F 0-68:A>T-68:A>T | TGCAGATCAAACATAAGGATAGAAAAAAACCCAAAAAGAAAAGAAAA<br>AGAGAATTGAACCCGACGTGA   |
| 39713954 F 0-36:C>T-36:C>T | TGCAGAAGTTGATAGCATCTTGTTGCACATTTATTTCCCTAAATTTTGATT<br>ATAATTTTGTTATAGGTC  |
| 39718701 F 0-39:C>T-39:C>T | TGCAGTCTTTTTGTCACACAGCATGTGCATGCATCCCATCTTACTTTGTGC<br>TCTATTCTATTCAACAAC  |
| 39725500 F 0-60:T>C-60:T>C | TGCAGAAAAGCTCATTGTCCTGTTTCTCACCATAGAAATACTAAGGCTCT<br>CGTTCTCCATTCGGACATA  |
| 39723897 F 0-33:G>A-33:G>A | TGCAGTCAAACACCATGTATGCTTTTATACATGTTTATTCAGAGAGTCG<br>GTCGAAGCTGGCAGCCAC    |
| 39722525 F 0-18:A>T-18:A>T | TGCAGCATCCAAATTCCCAATGTTGTTGATCCGTACAGTTCCGACTTCGC<br>CGTCCCCGTGGTCGAGTCA  |
| 39729453 F 0-14:G>T-14:G>T | TGCAGAAGAAAGCAGAGGATCATTAGTACAAGGGATTTTATCTTCATAT<br>GAGAAGGCTCTTTTAC      |
| 39716626 F 0-37:T>C-37:T>C | TGCAGCTTGGTGAGTTTCATATTCTGTGCGTTATCCTTTTCTCTACTATCA<br>TTTGGAGCCTTTGGTATG  |
| 46753678 F 0-18:G>T-18:G>T | TGCAGAAAGGGTTCACATGTCAGTGGTGTGAACATAAAAATTTATTTAGT<br>GAATGGAGAGAGAACATCC  |
| 39713650 F 0-48:C>T-48:C>T | TGCAGAACAACCCAAACCGCACCGTTGCTCTACCGTCGGAACGACTCAC<br>TGGATACCGTGCACCTCGTC  |
| 46756868 F 0-54:G>A-54:G>A | TGCAGGTTGGATGGTTATAGGCGCAAGCCCCCTCATTGGAGTCGTGTG<br>GCCTGAGCTTGAGCTACTG    |
| 39726871 F 0-29:T>G-29:T>G | TGCAGTTTTATCTCGAGATGTTCAATTTTTTAGAGGAATTATCCTGTAAACT<br>GTCATTGAACAAGAAACA |
| 39725086 F 0-22:C>G-22:C>G | TGCAGGATCACGAAGTCCATTGCCAATAGCAAATCCCTGGCCAACGTAT<br>TTAC                  |
| 39718410 F 0-55:G>A-55:G>A | TGCAGTGGCAGTGGCCTCTTTTCGGCGTTTCAGCGACTGAAGATTGTGAG<br>TGTCGGCGACAACAAGCAG  |
| 39718979 F 0-59:T>C-59:T>C | TGCAGTTTTTCTCTATGTTATCCCTTCTAGTATTTTCAGTTGAAGGATTGA<br>AACTAATGTTGTGTTGG   |

|                            |                                                                        |
|----------------------------|------------------------------------------------------------------------|
| 39726013 F 0-39:A>T-39:A>T | TGCAGCACAGCAGCAACTCAACTCAAATCATGACTTTATATTTACTTTTTCTTTTTGTAAAGGAAATTG  |
| 39727713 F 0-48:T>G-48:T>G | TGCAGGCCTTCCTTCAAGATTCAGATTCAGTGAATTGAGTGAATATGCTTTGGCATATGTGTTTTTTA   |
| 39722498 F 0-5:C>G-5:C>G   | TGCAGCATAATAACACTTCCAAGAGGGTTTCGAAACACTATGGCTAGCTTGATTTATCTGGTAAAATTGT |
| 39718313 F 0-44:T>G-44:T>G | TGCAGTGATGGAAGGCCAATGAATCAAGGGGAACAGCAATGGATTTAGTTTTATGAATATTCAATCCAA  |
| 39722230 F 0-32:G>C-32:G>C | TGCAGCAAAGTAGTAGGCTCTTTCAAGGCCAGCGAACCTCGAATTCCTCACGTAGCCCTTTGATAAA    |
| 39722099 F 0-59:G>A-59:G>A | TGCAGATGCTGCGTTGGCTGGAATTCAGGTTGGTTTTTATTTGACTGATAATGTCGTCTGACCTGGTGT  |
| 39724866 F 0-11:G>A-11:G>A | TGCAGCAAATAGGTGCAGATGGGAACCTTCTTTCTTTAC                                |
| 39714653 F 0-42:G>C-42:G>C | TGCAGAGTAGTTTGTCTTCCAGTGAATGCACTGTAGCCCGTAGTTGTGACTTGACTTGTAACGGTTTTCT |
| 39715483 F 0-8:C>A-8:C>A   | TGCAGCAGCACCGCCACCGCTACCTTCTCTTTTCACGGCATGAAGGATATGAACGCCAGATGAGACAGT  |
| 39728287 F 0-5:C>T-5:C>T   | TGCAGCTCGCAGCGATCACTTCGGAGGAGCTTGTTGAAGATCCTTTGAAATCGGCAGAGCAGTCCAAGC  |
| 39718157 F 0-34:C>T-34:C>T | TGCAGTCTATTTAATATTTATCAATAACCCCCACCCAAAGGCCTCTTGAACTACTAAGAATTCCTTTTAC |
| 39718921 F 0-17:G>A-17:G>A | TGCAGTTTGGTAAGCCGGTCGGAGCTGCAAAAGAGGTGGAAATGAATAAGAAAGACACGTTAC        |
| 39724377 F 0-61:C>A-61:C>A | TGCAGTTGTGCTCACTTCTTGCATACCCTGATATCAAAGTAGTCCATGCCACCACATCCCGCGTGGA    |
| 39714240 F 0-7:A>G-7:A>G   | TGCAGACAATTTTCAAGAAGCAAATCAGAAAAGCACTCGATCCTCAATCATTTTTGCTCTCATGTGC    |
| 39728192 F 0-34:G>C-34:G>C | TGCAGAGAGGACACTTCAACTTTTCTTTATTCAGCAGATGGAAAGTCGCATTTCTCATGCAAAAAAAAA  |
| 39715809 F 0-51:T>C-51:T>C | TGCAGCCAAAGTGTTCATATGTGAATGAAAAGTGGGTATATATATACTGATAAAATTTAGGGTG       |
| 39718983 F 0-31:T>G-31:T>G | TGCAGTTTTTCTTACAGGTATCTTTCTTGCATTTTTGTTTTGTTTTATTGTTTTTTGGAACTAAC      |
| 39722193 F 0-39:T>C-39:T>C | TGCAGATTGTTGGTAGTGCCGAGACGCTATGAGACAATGTCTCAACGCTACCCTCTCGGGTTTGAAGGC  |
| 39716136 F 0-45:G>C-45:G>C | TGCAGCGCACCTCTTGGCGGGTTTGTGTCTGATCTCCATCGGTCGGGGAATTGTTGCTCTGTTTTTTT   |
| 39716766 F 0-8:C>G-8:C>G   | TGCAGGAACTCGAGCGCAGAAATCATGGGTGCCTCTTCTTTGTTTTTTGACTTGGATTCAAAGTCCCTT  |
| 39719710 F 0-14:T>C-14:T>C | TGCAGATCAAAGGATAGCATCCAACAACGAGAACATTGTTCTTAC                          |
| 39715271 F 0-39:T>G-39:T>G | TGCAGCAAATGGCTTTGGATCCATGGTTATTTGATTTGATTTTTTTTATTTATTTTATTTTAC        |
| 39726784 F 0-26:A>G-26:A>G | TGCAGTTCAGAACTCGATGAAGGCCAACTCAAATTATTCAGAAACCTCAAGAGCATTGATACTAATTC   |
| 39718792 F 0-51:C>T-51:C>T | TGCAGTTGGGATATTGAGGGACTGACACCATAATTGTTTCGTTCTTGAATACATTTGAGGAACTATTAT  |
| 39714394 F 0-7:A>G-7:A>G   | TGCAGAGACGATAAGGGCCTAGTGGTTGGGGCTTCGGCCTATTACTATGACATGGACTTTGATGGCCCG  |
| 39715159 F 0-19:C>A-19:C>A | TGCAGATTGTTTTCTTCTTTTGTGTTTTGAATAAATCAAACCTTTGTTTTCTTTCTTTTAC          |
| 39714781 F 0-7:A>G-7:A>G   | TGCAGATAGAAAAGAAATGGCTAAAATTGACAAAATTGGAATGCTTGGAAACAAATCAAATTGGAAGC   |
| 39721908 F 0-47:G>A-47:G>A | TGCAGAGTCGTCGATTGACTGTGACGGAAGCTGAGGCATAGTTGACGGGCTGCGATGGCAAAGGTCACT  |
| 39721810 F 0-15:G>T-15:G>T | TGCAGAGCGGACGGAGATGCTTTTGGGAAGAGAGATCCGGCGGAGATTTATTCTTCCCGTCGAACTG    |

|                            |                                                                            |
|----------------------------|----------------------------------------------------------------------------|
| 39713264 F 0-53:T>G-53:T>G | TGCAGAATCTGCCGAAGATAAAAAGTATAAGAAAGAAACTGTTGTCATTA<br>TTGATAGCTAAACATGTTTA |
| 39719714 F 0-9:T>C-9:T>C   | TGCAGATCATATAATTGACCATACGAATTTTAC                                          |
| 39719691 F 0-34:A>C-34:A>C | TGCAGATACTTATTTCTCTTCTTTAGTTTTTTCCAATGTGCTTAC                              |
| 39726690 F 0-65:G>T-65:G>T | TGCAGTCTGTAGTATTATTACACTTCTTCTACTATAGAATGGCCAGACTT<br>GGAGTTCTCCCCCTTGTGG  |
| 39720787 F 0-23:T>C-23:T>C | TGCAGTGTTCCTATTGAGATTTAGCCCGCTGACTTATTACAAAGGCT<br>TTAC                    |
| 39723630 F 0-53:C>G-53:C>G | TGCAGGTGCCTTTGACAATAGGGCAAGTCTCAAGTTTTGCCTTTGACAAT<br>AGGCCAAGTCTCAAGCTTT  |
| 39718257 F 0-22:C>G-22:C>G | TGCAGTGAATAAAGAGATGATCCAGAGATTCCTCTTATTTTCCGCAAAG<br>GACCCATCTATTGGGACGCA  |
| 46754560 F 0-68:A>T-68:A>T | TGCAGATAAGGTAAGAAAATGAACTACTTTTGGAGAATTTTTCTCGTA<br>GCATATTCATTTTTTTTTTA   |
| 39727545 F 0-7:C>A-7:C>A   | TGCAGCACGCGTCACAAAGTCGTCTCTTGAAGAGACGATCATGGGTGTA<br>ATGATCTGCCAAAAGAGATT  |
| 46757296 F 0-50:C>A-50:C>A | TGCAGTGCAAAATTTTTTATGTGAAGCATGTCTACAAGATTTGAGTAAG<br>CTAAATTTGATGGTGAAGA   |
| 39721251 F 0-26:C>T-26:C>T | TGCAGAAATTTCAAAAATAGTGTGTGCGTGTGTGTGAGAGAGACCAA<br>AAAGGTTTCCACGAGACAGC    |
| 39723706 F 0-32:G>C-32:G>C | TGCAGGTTTTTATATGTAGTGAAAACAGAGCAGTCAAAGGTTGATGATA<br>ATGACAAAGAACAATGTATT  |
| 39727390 F 0-27:G>A-27:G>A | TGCAGACAACCTCCAATACCCGTAGATGGAGGAGAAGGTGCTTGCCCAAG<br>CAGCATCTATTCGAATTCAT |
| 39707645 F 0-26:A>G-26:A>G | TGCAGTACGATTTTACTTCCATTTCCATTCCCCTTCATTTTTAGTCTCTGG<br>TTTCTTTCTTTGGAC     |
| 39721668 F 0-46:A>G-46:A>G | TGCAGACTGGAGAAACTAGTACATGACTCATTCAAAGGGTAAACCTATA<br>GAAATCTATAGTTATTTATT  |
| 39725631 F 0-26:G>T-26:G>T | TGCAGAATTATGATTGAAATTGGGAAGAAAAAAGTAGAGAATATGACGT<br>ATCACGTGATGTGTGACTGT  |
| 39716095 F 0-62:A>G-62:A>G | TGCAGCCTTTGGGAATCAAACCTGGGAAGGGGAGAAACACATGTCACTC<br>CTACACCACACAGACAATAC  |
| 39723748 F 0-12:G>C-12:G>C | TGCAGTAAGAGTGATAAAAGATGATGATCCTAAGTGGGAGCCAATTGTT<br>TTGCCAGAAGGATCTCCGGT  |
| 39728489 F 0-25:G>A-25:G>A | TGCAGTCATCTAAATCTAGATATAGGTCATGTTACATTACAAACATTAC                          |
| 39716959 F 0-26:G>C-26:G>C | TGCAGGATAGCCACACACAACCTATTAGTATTACCTATAAATAGTTACCTA<br>CATAAATATAATGTTACCA |
| 39720077 F 0-24:T>A-24:T>A | TGCAGCCTTATATGGATGTTTGGCTTTTTTTTTTTTAC                                     |
| 39725907 F 0-36:G>C-36:G>C | TGCAGATTCAAAAAATAATAAGAAACGAGGAAACAAGGAAAAAATTGA<br>TATATATATATATATAAAT    |
| 39717075 F 0-61:A>G-61:A>G | TGCAGGCAGATTTTGTGGCATTCTTTTCAGCTAGGTTCTGGCTCAGCTCT<br>GCCCTCCAAACTCAGTG    |
| 39724483 F 0-30:C>T-30:C>T | TGCAGTTTTTGTCTTAGGCCCTCCTGTGCATCGGTACTTGCACGATTT<br>ACTTCAATATGCATTGGG     |
| 39724793 F 0-39:T>A-39:T>A | TGCAGATATGAAATTTATCAAACAGATCATTACCATGTATTTTAC                              |
| 39714627 F 0-32:A>C-32:A>C | TGCAGAGGTTATGGGCTGCTATAGGAAGTGGCACATGGGCTTCTATACT<br>GTGTCCAATGAAGTTGTCAA  |
| 39720022 F 0-9:T>A-9:T>A   | TGCAGCCACTCGTGGTGGATTTATTAATTAC                                            |
| 39724976 F 0-24:A>T-24:A>T | TGCAGCCTACCAATCACATCAACTACCTAGAAGCATTTCCTATTTCTTA<br>C                     |
| 39722108 F 0-45:T>C-45:T>C | TGCAGATGGCAGATTTGACTATATTGGACTAATATCGTTAGGATGTCA<br>TCTGCCTATAACTAAAAAT    |

|                            |                                                                         |
|----------------------------|-------------------------------------------------------------------------|
| 46761077 F 0-28:T>A-28:T>A | TGCAGTGTGTTTAAGAATGGCATTGGAATAGATTAC                                    |
| 39722500 F 0-19:G>A-19:G>A | TGCAGCATAATTAGCTTAGGTAACCTTGTTTCTTCTGGTGTA AAAATTGCTTGTGGTGGTGAAATAGATG |
| 39721914 F 0-23:G>A-23:G>A | TGCAGAGTGAAAATGAAATACACGACGAGGGTTTGTGATTAGATGATGATGTGATAGTGTATTTCATTTG  |
| 39718569 F 0-37:A>G-37:A>G | TGCAGTTAGGTAGGGAGTGTGTACGTGGGGAGTTACAAATGTA ACTTCTCCCTCTCTCTCACGTAAATG  |
| 39728702 F 0-25:T>C-25:T>C | TGCAGAAGTATGAATAAATTCTCTATCCTTATAGCAAAATCAAGTCAAAAGCTAGAATTTGATATTTAC   |
| 39716428 F 0-27:G>A-27:G>A | TGCAGCTGCCAGACTTTCCATTCTTGAGCATTGCAATATTCTGATTCTTTTCCATCAAACCCGCTATT    |
| 39728409 F 0-38:C>T-38:C>T | TGCAGTCCCTTTGTCTTTCTTATTGATTCCCAAGTCATCTTCTCAAGTCAAATCTGATAAACATCT      |
| 39722861 F 0-25:C>T-25:C>T | TGCAGCTAGAATAAATAAAGTGGGACACTAAAAAACTATGAACTACACAATGATTTGCAATGCATGTAA   |
| 39717975 F 0-24:T>G-24:T>G | TGCAGTATTCTTGATGCCAGCCTTTGGAGGTCCTCATCCTATCTTTGGAA GAGCTTGCTTTGGGGGAGA  |
| 46755761 F 0-18:G>C-18:G>C | TGCAGCTACTCGGTCCTTGCTAGGGACACAACTTCAATGCAATAATTTCTATGCTGAAGGGGTAACA     |
| 39719432 F 0-12:C>A-12:C>A | TGCAGAAGTTACCATGACTAAACTTGTGATTGATTCAATTAC                              |
| 39719880 F 0-10:A>G-10:A>G | TGCAGCAAGCATTGACATTTCCAATGGTAATTGTATTTAGTTTCTTAC                        |
| 39726416 F 0-7:A>G-7:A>G   | TGCAGGCAAGTGCCTATGATGAGAGCGTGAGGCGCCTAGCAGGTATTGCACCTCTTGTCATCTTGCGTT   |
| 39717084 F 0-44:T>A-44:T>A | TGCAGGCAGTACATTGGCTCTAACGTTTTGGCGCCATTGCAAAATGTTTCAAAGTCAGCTCCAGATGAG   |
| 39714427 F 0-48:T>C-48:T>C | TGCAGAGAGGCATACATAACACAACAAAATATAAGGATAAAGTATATATATACTCTTCGACTATGAGGT   |
| 39713408 F 0-33:A>C-33:A>C | TGCAGAAAAATGCACAATTTGTAATGCAGCCACATGAATTACTCTATTATAAGGAACTTATCATATA     |
| 39721940 F 0-25:T>A-25:T>A | TGCAGATAAGTTGATTTGATGTCTTTCAACCAAAAGTTCTCAGACTTCAG AATAACAAGAATTCAATGA  |
| 39728189 F 0-18:A>C-18:A>C | TGCAGAGACTTCTTCAGAACCTGAGACTAGCATCTCAGGCTTATGGTTGTCAAGCCATCCATGGATGC    |
| 39722426 F 0-6:G>A-6:G>A   | TGCAGCGGCAGCAGCAGCAGCCCAACAAAACAGGACGCCCAATGTCTTCCAACCATGGTCACACAAAAT   |
| 39724190 F 0-43:G>C-43:G>C | TGCAGTGTTTTGCAGGAGCACTTATCTAGTGTTTATGTAATGTGTTGTACACTTCTGGTGTTAC        |
| 39724639 F 0-16:T>C-16:T>C | TGCAGAAGACTCCACATGCATATGAACAAGTGTCTTCAATCGGAATTTAC                      |
| 46757511 F 0-42:C>G-42:C>G | TGCAGTTCAATTTTTTCTCCTTTTCTTTTACC GCCTGAAGCTCGTTTTTTTCTCTTTACACTTTTT     |
| 39722003 F 0-57:G>A-57:G>A | TGCAGATCATACACAAAATGATCGAGTGACTTGTGAAGATCGAGTTATGTTTGAATAGTCACTACAACA   |
| 39725276 F 0-13:G>A-13:G>A | TGCAGTCGCTATCGTTGGAAAAATCTGTAGCTGTTAC                                   |
| 39725775 F 0-40:T>A-40:T>A | TGCAGATGATGTAGAAGATTTCGAAGGAGTGGATGCAGAATATGTTACATCGTTTCGTTGGTATAACAA   |
| 39724872 F 0-29:C>T-29:C>T | TGCAGCAACATCTCAATCCATTACCCCTCCGAACGTCCACCGAACATACCTCGTTTAC              |
| 39723759 F 0-60:A>G-60:A>G | TGCAGTAAGTTCATTTGCCACCCCAAGAGAGAGAGAGAGAGACTCTTTGTTTGTAGTTGAGCTTAGAA    |
| 39721981 F 0-57:G>C-57:G>C | TGCAGATATGTTTACCAAAACTTCCGATTGATAAGTTTGACTTATGTATGAGAAATGTTGCATATTGA    |
| 39713297 F 0-43:T>G-43:T>G | TGCAGTGGTGC GTTTACGCCAAATCTGTGTTTCCACAAGCATTTTCTAGCCTAGATCTGGTGCTCGAC   |

|                            |                                                                           |
|----------------------------|---------------------------------------------------------------------------|
| 39717426 F 0-27:C>T-27:C>T | TGCAGGTA AATTCAACAAAACCCGTATCGAAGTCAGATCAGGTT CAGCT ATATCTATAACCATGAATTCA |
| 39716596 F 0-22:C>G-22:C>G | TGCAGCTTCTGACATTTTCGCACAGAGGAAGGAAGAGCTCGAGAGAGAG AGAGAGAGAGAGAGAATGAA    |
| 39724375 F 0-15:T>C-15:T>C | TGCAGTTGTCAA AATTAGAAAGTTGCCTTCTCGCATTTTCCAAAAGAGTTG CATTCTGCTTCTTGATTGT  |
| 39722492 F 0-14:A>G-14:A>G | TGCAGCAGTTGGGGAAGAGGCATATTGTTGGGTTTCGTCTCTGGATGAG GTCAGCTGTGTTGATACATG    |
| 39722212 F 0-44:A>G-44:A>G | TGCAGATTTTGATGAATTGCAGTTTCACATAATCTAATCCCTTACTCACT TTTCCAGCTGATGTTGTG     |
| 39728998 F 0-31:A>T-31:A>T | TGCAGCAACAAGTTCCTAGACATGTCTCCTCATCACTTCCCCCACTTCTTT TACTATTTTACCCTCCCT    |
| 39721655 F 0-21:T>A-21:T>A | TGCAGACTCAA AACGAATCAGTACAAACACCACAATAACTAGCATATAA GAACAAGGAAGAAAACATGA   |
| 39724400 F 0-35:A>T-35:A>T | TGCAGTTTCAA ACATAACAACAATAAGTAAATAGTATTGAGCTCCATAG CTTTACTACTTTTCACTATT   |
| 39719881 F 0-21:C>G-21:C>G | TGCAGCAAGCTGTGGTGGGCCCTCCCCCATGAAAAGTTAC                                  |
| 39716723 F 0-38:T>C-38:T>C | TGCAGGAAACGGAGAATTTTGAAGCAGTCCACATAATCTTGGGCCCAAG CCCAAACATTTTGATTCCGGC   |
| 39728493 F 0-17:G>A-17:G>A | TGCAGTGAATTGTGAGCGAAATGAAAATGAAAAAATATGTGCAACCAA GTTTTAC                  |
| 39723264 F 0-27:G>C-27:G>C | TGCAGGATGGGTATTGGAGTGTTATAAGGAAAAGGAAAAGAAAAGAAA TGCAGGATGAAAAGGGAGGG     |
| 39718099 F 0-37:C>G-37:C>G | TGCAGTCCCCTTCCATCGTTGGTGCTGCATAGTTAGGCCGCCCATCAAAG AAGAGTCTAATACTCTCTA    |
| 39717466 F 0-50:G>A-50:G>A | TGCAGGTATAGAATATTTTAGGTATGATAATGAACTATGATGTCTTTCT GCTAATTCTACGATGTTGT     |
| 39722948 F 0-68:T>C-68:T>C | TGCAGCTGATGATGTACCTGAATGCCCTTACTCTCTAATTGCACAAAATG CAAATGAAATCTTTTTTTT    |
| 39717331 F 0-13:A>G-13:A>G | TGCAGGGGAGAATAATGCTGTTATCCTATTCTGGTTCCTAGTACTA ACTA CTAAGTAAATAAATATCCC   |
| 39716694 F 0-68:G>A-68:G>A | TGCAGCTTTTGTTGACTAAAGTTGATTTTATTTGGGAATCTGAAGTGTGC ATTTTCTTTGTTATATCTG    |
| 39716630 F 0-68:A>G-68:A>G | TGCAGCTTGTGCTTGATGCAGAACAAGCAAGGACACAGACACACAAAAA GAGCAGAAAATAAAATGCTCA   |
| 39725083 F 0-38:A>G-38:A>G | TGCAGGATAGCCGCCTACAAAAGAATCAACAAATAATATGCCTAAACT ATTAC                    |
| 39719368 F 0-35:C>T-35:C>T | TGCAGA ACTAAAAGTTTTCTTTTTTTGACTAAAAGCTTTAC                                |
| 39720348 F 0-38:T>G-38:T>G | TGCAGGATCAAAGCAA AATTCATCTCATGTGAAACACTTTTTTTTACTATG TAATTAATTAC          |
| 39725997 F 0-42:C>G-42:C>G | TGCAGCAATACAACGACTTGAAGAACAAGTTCTCTCAAAGGGCCATTTT TTATTTTACTTTTTTTTCTT    |
| 39726649 F 0-24:A>T-24:A>T | TGCAGTCATGACACA ACTTCAGCCATCTACCACATATTCTTACAAATATG GAAGGTATTTAC          |
| 39722279 F 0-65:G>A-65:G>A | TGCAGCAACTAACAGCAGCACCTAAGAAATGGAAGATACCACATCTAGC TGAGCTAGAGATAGTAGTTC    |
| 46753663 F 0-62:A>C-62:A>C | TGCAGAAAGAGATAAAAATAACACTTTTTTTTTCCGGTTGAAATATATGAA AAAAAAGGAAGAAGCCAG    |
| 39721587 F 0-14:G>A-14:G>A | TGCAGACATCAACTGCTCCATCTAAATTGCAGAGAAGCGTCAGAAAGGA AAATCCAGTTGATTTTGAGG    |
| 39716005 F 0-6:T>C-6:T>C   | TGCAGCTGGCTGCTGAGGTTCTGCTCTCCTTTATGGTCTACAATTTTGC AGCGGTTGCACATCATGG      |
| 39716206 F 0-5:T>C-5:T>C   | TGCAGTGTGAGGGGTCGATTATGGCAGCTTCACTTCTCCAGCGCGCG TGGGGTTCATTTTCTGGCG       |
| 46757577 F 0-43:T>A-43:T>A | TGCAGTCTGGAATTTTTTTTCCGTTGTTTTTTCGCTTGTCTTTGTTTTG TGTTTTCTTTTTCTGTT       |

|                            |                                                                         |
|----------------------------|-------------------------------------------------------------------------|
| 39714547 F 0-16:T>C-16:T>C | TGCAGAGGAAGAAGATTCTTCGAAGTCTTGAGTCGTCGTGCGGCGGCGG GGGGCCGAAAATGGGGCGG   |
| 39722358 F 0-43:T>C-43:T>C | TGCAGCACCTCCCGCTGCCGGAGATAGACCGACGCCACCCACCGTCGGCC CGAAATCTCCGTCGTCGCAG |
| 39729022 F 0-17:T>G-17:T>G | TGCAGGCAGCAACCTTGTGAAGACCATCTGTCTATGGTGTCTCAAGGTG TAATTATAGTTTTTACAGA   |
| 39728495 F 0-43:T>C-43:T>C | TGCAGTGTACTTGGGAATTCAGTAATTATAGTTTTCTGCAATTTTTTTTAC                     |
| 39713872 F 0-36:C>G-36:C>G | TGCAGAAGGAGAGGAAAGGAACGGAGAAAAGTGAAACCCTAGAGTGAA GTGAAACGCAGGCGGCGGCGG  |
| 39726680 F 0-33:C>T-33:C>T | TGCAGTCGAGGGAGTCCAACCCTACTACTCTCTCGTCGTCGACTGAATCC AATGAGAATGCTAGTGTA   |
| 39728776 F 0-23:A>G-23:A>G | TGCAGTCCAGTTGAGCACGAGCAATTCCTCTCCCTCGACCTCAACCTCAA GCCCGTCCGATTATTTTCA  |
| 39725281 F 0-24:G>A-24:G>A | TGCAGTCTAATGGAGAATCTTTATGGAGGTGTTTTTTTTTAC                              |
| 39715896 F 0-55:C>T-55:C>T | TGCAGCCATGACTCTCACCATTGCCCCAGAAAAAATCTCTAACCAACTTC TCCATCTGCCTAATGACTC  |
| 39717805 F 0-44:A>T-44:A>T | TGCAGTAATTGGAACCAATGAATTTTTTGAAATGGGTGAGTGCATAGA GATTGTTTTGAGGGTAAGGA   |
| 39723762 F 0-58:T>C-58:T>C | TGCAGTAATCAGGTGACTTAGAGCAATGAAGACATGAGAGACCTATTGA ATCTTCTTTTGCATGTAGTT  |
| 39726253 F 0-61:T>C-61:T>C | TGCAGCTCATGAGGCGACGGCGAAATCAGCCGCTTCCCGACGCCGTTCCG TTGGTTTTCCGGTCGCCGTC |
| 39727943 F 0-13:G>C-13:G>C | TGCAGAGAGTGAAGATACTCCAGCGTCCGAGCTCTCACCGCGTTGTGC TATCGTCATGACATATATCT   |
| 39722095 F 0-59:C>T-59:C>T | TGCAGATGCTATTTTCAGAGGACCCGAATAATGTTGGCAGAGCAATGGTA TGTTTTATCTCATTATTTA  |
| 39721335 F 0-14:C>A-14:C>A | TGCAGAAGAAGGTACTCTTCATACTTTCCTTCTTTTTAGTTCAACCATG AGGGAATCGAAACTCTAAC   |
| 39728701 F 0-7:C>T-7:C>T   | TGCAGAACGTGTTAGGTCTTGTGAGATCCATGTATGCCTTGATCTGCTTG GAGGAAGATGCTTCGTTCC  |
| 39714393 F 0-15:A>G-15:A>G | TGCAGAGACGAATCAATATAAAGCTCTAACAACTCGGTTGAAGGAATAT GCATTTACCAATTGAGTTAG  |
| 39727190 F 0-37:A>T-37:A>T | TGCAGTAAAGTACTCTACTAACTTATATGAGTGAAGAACATGCATAAAG TTAC                  |
| 39729356 F 0-51:T>C-51:T>C | TGCAGGTTAGTTCACCCTTTTCAACTTCTAGAATTCATCTCCATTACAAT TTGATTGCAATTAC       |
| 39723127 F 0-32:C>A-32:C>A | TGCAGGAAATGTACAGACAGGATACAATAGAACCAAAACCTTAGCACAT AGCAAAGCCACACAATAGTG  |
| 39713759 F 0-28:G>C-28:G>C | TGCAGAAGAACACAACCTGCCTTGTAAGTGAACCTTTCCTAAGATTCTTAC ATATTTTGATATGCAGTCG |
| 39727463 F 0-10:T>A-10:T>A | TGCAGAGTTTTGTGGTTTTTTTACCTCCAAACACATTTTCAATCAAGCTGC CATCAATAAGATCACAAC  |
| 39725479 F 0-30:G>C-30:G>C | TGCAGAAGAAAACTCTGTTACTAATAATGGATTTACAAATATAGAAA TGTGGGAACCGATTTTGCAA    |
| 39717487 F 0-61:T>C-61:T>C | TGCAGGTATTTTTCCCTTACTAATTGCAATGTAAGAAGGCATCATGCACA TGATCAGAGGCTGAAGAAC  |
| 39723147 F 0-35:T>A-35:T>A | TGCAGGAAGGTTACCTTGTCTATGAGTGTAATGAATGGTGGAGCTGTAG TAGAACCTGTCCAAATAGAG  |
| 39715844 F 0-26:T>G-26:T>G | TGCAGCCACCATCACCGGAAAAATCATGTTACATGCCCTCTTTATTCGAC TCACTCATCCAAATCCACA  |
| 39718521 F 0-29:T>C-29:T>C | TGCAGTGTGTTTTCTGAAGGGATTGAATCTCCAAAAGAAGCGCATGTAA TCACGTGTGATTCAAATTGT  |
| 39714894 F 0-44:C>T-44:C>T | TGCAGATCCTATTTGGACCCCTCGTAGACTGATTGACAAGAATACGGTTT AACTATATGGCCATCATT   |
| 39713737 F 0-56:G>A-56:G>A | TGCAGAACTTACATCACTAGACAAATTCAGATAGGTCAATTCAGGGTC GAGTTCAGGCTCAAGAGATT   |



|                            |                                                                              |
|----------------------------|------------------------------------------------------------------------------|
| 46771725 F 0-63:G>T-63:G>T | TGCAGACCCACTTCTCGCCACTACCCACTTCATCACCAGCCACTACAAC<br>GCAAGGTTTTTTTTGTTTT     |
| 39721323 F 0-39:A>G-39:A>G | TGCAGAAGAAAGAATATGAAGTGAGAAAGAGAGACGAAGTGAGGAC<br>TAAAGAAAAAAAAAAGCAATAAA    |
| 39723936 F 0-39:G>C-39:G>C | TGCAGTCCAAAATGATGGTTTTGGATGTGCTTCCTTATCGTCAGCCGCAA<br>CTTTTCTTCGGCAAAGCTC    |
| 39723936 F 0-44:C>T-44:C>T | TGCAGTCCAAAATGATGGTTTTGGATGTGCTTCCTTATCGTCAGCCGCAA<br>CTTTTCTTCGGCAAAGCTC    |
| 39724823 F 0-10:A>G-10:A>G | TGCAGATGACAGTTGTATTTTTTTTTCTTTTTTAC                                          |
| 39719754 F 0-28:C>G-28:C>G | TGCAGATGAGAAGCAACCACCCACTCCTGCTAAATTCAGGGAGTGA<br>GTGGTTAC                   |
| 39717842 F 0-49:C>G-49:C>G | TGCAGTACCTTTGTTAGGGGGAAAATGCAAACCTCAACCCCTCTAGTCC<br>AAGAAATATTCCCAATGC      |
| 39713921 F 0-64:G>A-64:G>A | TGCAGAAGTACTTAGGCCAAACATCTGCAAGTCGAGGGTTCTTCAGCTCA<br>TTCGACTTTGCCTACGAATT   |
| 39719300 F 0-13:C>T-13:C>T | TGCAGAAACTTTACCAGAAAGAAGTGCCTGAATTTTCAAGGTGAACCTT<br>TTTCATTAC               |
| 39723039 F 0-46:A>C-46:A>C | TGCAGCTTCTTGGGATTCAATCTGCCAAGTAATTCAAATTAGTAGTATTT<br>GAAATTATTCAATTCAATT    |
| 39721655 F 0-30:A>C-30:A>C | TGCAGACTCAAAACGAATCAGTACAAACACAACAATAACTAGCATATAA<br>GAACAAGGAAGAAAACATGA    |
| 39726133 F 0-45:G>A-45:G>A | TGCAGCCCCAAATTACCCTAACCAAAAACATGGAACATAAATATCAGCAT<br>TAGATCCTTACTGAGCTTAG   |
| 39716459 F 0-68:T>G-68:T>G | TGCAGCTGGACTCAAAGCAGCTGTAAATTCTTATCCTTCCTCTGATCTTTT<br>GCAAACATATTATGTATGT   |
| 39716510 F 0-53:C>T-53:C>T | TGCAGCTGTTCTTTTTGTTCATGGTCTCTTCTCTCAAACGAAGGCTTAG<br>TGCCCGTTTGGCGTTGCT      |
| 46762442 F 0-33:A>G-33:A>G | TGCAGAAATTGCGTAACCAGAACTCGATGATGACATCAATGAGGTTTATTT<br>TGTGATTGTTGCGGACAAT   |
| 39721745 F 0-53:T>A-53:T>A | TGCAGAGAGCAACATTCATATTTAGCTGGTCAAGTACAAAAGCCAAGCT<br>TACCTAAAAGACATATTTCAA   |
| 39727757 F 0-8:T>G-8:T>G   | TGCAGTCTCTGAAGGGCAGCCAGAATTAGTTCAATTTTTTTTTCACTCA<br>CTTTCTCTCTCCTCATTCC     |
| 39715883 F 0-32:T>A-32:T>A | TGCAGCCATAGTAATCCCCAAGGATAATTTCTTTGTGAGTGCATCGTTT<br>TGACTTAGCAAACCTCTTCT    |
| 39727039 F 0-24:A>G-24:A>G | TGCAGATTATGATTGTGGGAGATAAGAAGATAAAAACCTTTCATATTCATTT<br>AC                   |
| 39724395 F 0-66:C>A-66:C>A | TGCAGTTTATACCTAGAAGCTAGGGATCGAAAACAAATCACCGACAATCT<br>CTTCTGATGTTTATTATCAA   |
| 39714975 F 0-50:C>T-50:C>T | TGCAGATGATTATACCTCCCACAGGCCCGGCAGCCATATGAAATATGAA<br>ACAATAATCAATGAATGTAA    |
| 39715253 F 0-13:C>T-13:C>T | TGCAGCAAAGAATCGACCGCCATGGCCGAAGTAGAAGACGACACTCCA<br>AGAACAGATGCTCTCTCCAGG    |
| 39719727 F 0-45:G>A-45:G>A | TGCAGATCCACAAGAACAATGTCCCGCTATATCACTGAGAAATGGGAAA<br>CAATTAC                 |
| 39728902 F 0-65:T>A-65:T>A | TGCAGCTGTCTATGAGGCAAAAGAGAGAATATTCAAATAGCATCTTCAA<br>TAAAAAAAAAAAAAAAAATTAGA |
| 39722420 F 0-5:C>T-5:C>T   | TGCAGCAGCAACCTGATGAACATGTGCATATACACATGATGTAAGTGGG<br>ATGGACTAAAAGAGGAAAAA    |
| 46755841 F 0-10:A>G-10:A>G | TGCAGCTCGCACGTCTACATTGAATTGGCCGAAACACTGCTGAATAA<br>ACATAAAAATGAGTGGGTAT      |
| 39716257 F 0-9:T>C-9:T>C   | TGCAGTACTGTGCGAACCTGCAAGATCAACATGGAATGATATTTCAA<br>CAAGAAAGTACCCAACCTCAC     |
| 39726650 F 0-35:T>A-35:T>A | TGCAGTCATGACACAACCTCAGCCTTCTACCACATTTTCTTACAAATATG<br>GAAGGTATTTAC           |
| 39714441 F 0-5:G>A-5:G>A   | TGCAGGGATAGATGTATGAAAACCTAACTCTAAAATCAAACCAAATGCA<br>GCATGGTATCGAGTTGAATT    |

|                            |                                                                             |
|----------------------------|-----------------------------------------------------------------------------|
| 39713966 F 0-33:G>A-33:G>A | TGCAGAATAATGATAATAACATGAAGAGGAAGAGGAAGAAGAAGAAGAAGAAGATGGGCTTATGGGTGG       |
| 39716048 F 0-34:C>G-34:C>G | TGCAGCCTCTCTCCCCTGGCTCCTCGTCGTCGTCCTCGTCTTTGT<br>CGAGGGAAACGGGTAGAG         |
| 39728632 F 0-28:C>T-28:C>T | TGCAGTTCTGGTATCTTTGATTGAGGTACGATATTGCTCTACTCTAGCAA<br>TATATCATAATTCTTGCTC   |
| 39718037 F 0-16:G>C-16:G>C | TGCAGTCACTGATAGTGAATGGTTTCTCTCACAATTTGTGCAATTCACAA<br>GATCTCTCAACTCCCAATC   |
| 39726548 F 0-62:T>G-62:T>G | TGCAGGTTATAGTATTCATTTACAAAGCTCAGGTTATAGCTTTCAAGTGA<br>TTTTTTTGAAAATGATTAA   |
| 39715160 F 0-59:A>G-59:A>G | TGCAGATTTAAAATCTTTAGAAAGTTCCTGCTTCCACCAAAGATAGTCAA<br>CTGTCAAAAACAAAAGTTC   |
| 39722221 F 0-47:G>A-47:G>A | TGCAGCAAAAATATCTATATAGCATATTTTTGCATTTTTTAGAAAATAGGT<br>TACAGACAACAATTTTTGTC |
| 39726318 F 0-34:C>A-34:C>A | TGCAGCTTATACTGCCCTTTTGTTCATAGTTCCCTCGGGAGAGAGACGA<br>GCTTGAACCCTCTGTCAAT    |
| 39722775 F 0-8:A>G-8:A>G   | TGCAGCGAATCCATTGCGTGAATATGCCGTCGTCGAGGTTGTTATTGTTT<br>TCGGAGACAAAGGAAATCA   |
| 39722221 F 0-17:T>C-17:T>C | TGCAGCAAAAATATCTATATAGCATATTTTTGCATTTTTTAGAAAATAAGT<br>TACAGACAACAATTTTTGTC |
| 39721163 F 0-26:T>C-26:T>C | TGCAGAAACACCTTGGAAAAAACAGTGGTGTAGAAAGGATCAAGATTG<br>GAGTCAAGCCATTTCCCA      |
| 39721875 F 0-14:A>T-14:A>T | TGCAGAGGGAGGGAAGTGGCGGAGGGTGACGATGAAGGCCGGTGGCAG<br>CGCGGTGTCTGCTCCATAAA    |
| 39723049 F 0-24:C>G-24:C>G | TGCAGCTTGCTGTCCCTAGATCAGCGCAAGATGCCCTTCTAGTCCGTCTT<br>TGCGAATCTAAAAAGGAAA   |
| 39727538 F 0-13:T>G-13:T>G | TGCAGCACATATGCAAGATTACATAATTTTCTTATATACATATGCCGC<br>AATAACTTTTGCTCCTCT      |
| 39728946 F 0-26:A>G-26:A>G | TGCAGCGTTTTGTTTCGTTGGAGCGTCATTGGCGAAGAACAGTCAAGTCTA<br>CAACGGAGGTTTGTAAACGG |
| 39721169 F 0-57:A>G-57:A>G | TGCAGAAACAGTTGCAGAATACCACACAATCTCAATACAAGATGAAGTC<br>ATTCAAATATATAGGCTTTC   |
| 39728702 F 0-36:A>T-36:A>T | TGCAGAAGTATGAATAAATTCTCTATCCTTATAGCAAAATCAAGTCAAA<br>AGCTAGAATTTGATATTTAC   |
| 39718148 F 0-60:A>G-60:A>G | TGCAGTCTAATAAATACAAAAAAGAAAAGTACTAAAAAATACAAAAA<br>TAAAAGAGTGACAATACAAAA    |
| 39718651 F 0-34:T>C-34:T>C | TGCAGTTCGATGAGGCTCAAGTCTGATGAGGTGTTACTCTTGCTCCGACA<br>CTCGAAACGACGACTCTAT   |
| 39727994 F 0-20:A>G-20:A>G | TGCAGAGTATGGTGTCCACAGAAATTTTGCATTATAATTTACTTTTTTA<br>C                      |
| 46760665 F 0-44:G>A-44:G>A | TGCAGCTATTAAGAGCAGTGCATGAAGCTTCTTTGTTTAGTGAGGATAAT<br>AATTTGGTTCCTCTTTGCT   |
| 39723873 F 0-37:C>A-37:C>A | TGCAGTATGCCTATAAGACAATCAACTCATAATTTACCATTAGCTTGTGC<br>TATTAGTTTCACGAACTGC   |
| 39725362 F 0-7:G>C-7:G>C   | TGCAGTTGAGGGGCATGTTTTAGAATGTAATTAC                                          |
| 39717797 F 0-13:G>A-13:G>A | TGCAGTAATGGATGGCCTTCCTCAAAATTCAGGAGAATGATAACAGAAT<br>ATATCATTTTTAC          |
| 39717206 F 0-15:T>C-15:T>C | TGCAGGCTGTAAATTTGCTGCTGTACTTTCCTTTTCGTTGCCTTATTAC<br>CTATTAGGTTTATGCATG     |
| 39718527 F 0-44:G>A-44:G>A | TGCAGTGTTCGAAAGGAAGAAGAAGCGTGTTCCTTTGGAAGGAAGCGTT<br>TTTTGGGGATTTTTCCATA    |
| 46765472 F 0-49:C>T-49:C>T | TGCAGTTGTTTTAGCGAAGACGTAACCGACCTCCAATGCGGGCTTGTATC<br>TTCTTGAGGACCATCTCC    |
| 39722426 F 0-16:G>A-16:G>A | TGCAGCGGCAGCAGCAGCAGCCCAACAAAACAGGACGCCCAATGTCTTC<br>CAACCATGGTCACACAAAAT   |
| 39718453 F 0-19:T>C-19:T>C | TGCAGTGGTATTAACCATGTCATCAACGTACACAAGTGTATGATTGAGA<br>AGTTATGTGAATTGGGCACC   |

|                            |                                                                         |
|----------------------------|-------------------------------------------------------------------------|
| 39715281 F 0-38:A>T-38:A>T | TGCAGCAACAATGGAGAATGGACGGAGTTTGTCTGCAAATGCCTCCGACCCAATGGCTTCGAAAGACA    |
| 39723581 F 0-50:T>C-50:T>C | TGCAGGTCAAAGAAGCTCAAATTTCAAATTGACCTGGAAAAGAACTGTTGTCGCGGTTACTGGTAAGGG   |
| 39722491 F 0-44:G>A-44:G>A | TGCAGCAGTTGGGGGAGAGGCATATTGTTGGGTTTCGTCTCTGGGTGAGGTCAGCTGTGTTGATACATG   |
| 39728218 F 0-66:C>G-66:C>G | TGCAGATATTGCTTCAAGGGCTCTCACTGTCACAACCTCACATCCATAAAC AATTAGAACTATCTATCAC |
| 39724188 F 0-51:C>A-51:C>A | TGCAGTGTTCCTTTTCAACGCTATATATATTTTTTTGTGCTAAAATACTTTCTTTCTTTCTTTCTTTCT   |
| 39714948 F 0-64:G>A-64:G>A | TGCAGATGAAGGTTATGCAATCTTCTTTCTTTTCATAATTTCAAGTTTCATT TTTATTACTGACAGAGTA |
| 39727901 F 0-5:T>C-5:T>C   | TGCAGTTGTATCTGAATATATAACCAATAGAAAAGGTAGAGAAATCATA TTGGCTGACACCTCAATATT  |
| 39718405 F 0-39:T>C-39:T>C | TGCAGTGGATTAGTTCGAGCTTTCGAACTATTTAGGTTGTTGTCCATCAA GAGATTGGTTACCTTGGGT  |
| 39713514 F 0-25:A>T-25:A>T | TGCAGAAACTGAAAAGCTAAAAAAAAAAGGAGCCAATAAAATCTAAAAT AACCTTTGTAGATGTATTTTT |
| 39723040 F 0-60:A>T-60:A>T | TGCAGCTTCTTGGGATTCAATCTGCCAAGTAATTCAAATTAGTAGTCATT GAAATTATTCAATTCAATT  |
| 39718116 F 0-51:G>A-51:G>A | TGCAGTCCTTCATCGCCCGTTCAATTTCTTCGACAGGTCTGGGATTTCTTC GGCAGATCTGGGTTTTCT  |
| 39721531 F 0-47:A>T-47:A>T | TGCAGAATTTAGACGAAATCGAATTTGGGTTTATTCAGCGAAGGAAGAC TTCGGCTTGCAGTTGCATCA  |
| 39721552 F 0-55:A>G-55:A>G | TGCAGACAACAAAAGGGGATTGGTTGATCAGTGTTTTAGAAGCAAAGGC TATGTGAGAAGGACTCAAT   |
| 39716590 F 0-19:T>C-19:T>C | TGCAGCTTCTCCGGTGAAGTTCCTCGACGGCGCGACAATGGTGCAGCAG CTACAGTTAGCAAATCCGGC  |
| 39713646 F 0-8:A>G-8:A>G   | TGCAGAACAAACCGAACTGTTTTAGATTTTGAAGTCAAATTTTGTAAAG ATTTTGTTCAGATGAAGT    |
| 39713961 F 0-12:A>G-12:A>G | TGCAGAATAAAGAGAGGTTAGGTGTGGTTATGGTTGATCCATCGTGATC TCTGAATCTCTCATTCTCAT  |
| 39716655 F 0-40:C>T-40:C>T | TGCAGCTTTCATTAATAATTTACCTCCTACATGTTGATCCCCGTTGTAAAA TATTATACTAAAATTGTGG |
| 39718493 F 0-50:G>C-50:G>C | TGCAGTGTCTAGAATAATATTGCAAATACATCAGGCTACGATTTTTCTTC GCTGTATAGTCTGAACTAT  |
| 39715128 F 0-22:C>G-22:C>G | TGCAGATTGAATTTTAGGTGTACATATGTGAATTTTAGGTGCTGGAACT GAAAGTTAGGTGCTGGAAA   |
| 39725048 F 0-30:C>T-30:C>T | TGCAGGAAACATTTATATTTCTTATTGACTCATTTCATGATCATGAATTAC                     |
| 39715903 F 0-14:A>G-14:A>G | TGCAGCCATGGGCAATGCATCTAAAGCAATCTTCTTAGCATTCTCATAGG TTTTCAATAATTTAGATG   |
| 39720362 F 0-23:T>C-23:T>C | TGCAGGATGGATAGGTTAGGTCTTGTGTTGATAACATTTTCATTTAC                         |
| 39716221 F 0-23:G>T-23:G>T | TGCAGCGTTGAGCGCTGCTTTCAGTGGCCTTTCAATGCTGCCATCATTGG TTCTTAGTTGATTTTCATGG |
| 46765472 F 0-54:T>C-54:T>C | TGCAGTTGTTTTAGCGAAGACGTAACCGACCTCCAATGCGGGCTTGATC TTCTTGAGGACCATCTCCC   |
| 39717747 F 0-58:A>G-58:A>G | TGCAGTAACGGGACAAAACCCACGAATCTGCGGCTATGAGGTGACGTCG GGACCTGCGACTGTGAGCGA  |
| 39717754 F 0-8:C>T-8:C>T   | TGCAGTAACTGAAACATGTGACCAACAACAAAATTCATCGTGGGTATTT CTTCCTCACGATTTTCTTCG  |
| 39724186 F 0-17:C>G-17:C>G | TGCAGTGTTCACGACGACGATGATGGCTTTGATTACGTGCTTCAAGG TTTGAATCACCATCTTGTG     |
| 39716594 F 0-21:C>T-21:C>T | TGCAGCTTCTCTGCTATTCCCAACTCTGCTAGAGGGCGGTGACATTCTTA TGTGGCTACCTTCAAAAA   |
| 39726987 F 0-32:A>T-32:A>T | TGCAGACTGAAAATAGCATACTAAATCTGAAAAATGTTTTAGTTGTTCC TAAATATTAC            |

|                            |                                                                             |
|----------------------------|-----------------------------------------------------------------------------|
| 39715458 F 0-34:T>G-34:T>G | TGCAGCACTAGTTCATTTGTTGACAGAGAATAAATTTTACAGTTACTAGA<br>GTAATCTAGACAACAAGGA   |
| 39717129 F 0-32:T>C-32:T>C | TGCAGGCCCGTCCCAAATGAGATGGGACCCCTGTGATACTTTTCAAAGTG<br>AGGTCCTAAATATTTTATAC  |
| 39717806 F 0-17:C>T-17:C>T | TGCAGTAATTGGAGCATCTCATTCCCTACGTGCAAATTTTTATCTTTCAGG<br>TTTGGCATTTCAGTTAGCAA |
| 39725525 F 0-34:A>T-34:A>T | TGCAGAAACTTTTGCTCGAGTCGAATCTATAGTTATAGCGATGTGGCGAA<br>ATCTCTGTGGGAACTGAAG   |
| 39719111 F 0-19:C>T-19:C>T | TGCAGCAAGTGTTGATATGCTGATGACAATGATCCTTGTTTTGTTCCCTC<br>CTGTATTCCATTTTATGAT   |
| 39726013 F 0-57:T>C-57:T>C | TGCAGCACAGCAGCAACTCAACTCAAATCATGACTTTTATATTTACTTTTT<br>CTTTTTGTAAAGGAAATTG  |
| 39722500 F 0-68:G>T-68:G>T | TGCAGCATAATTAGCTTAGATAACCTTGTTTCTTCTGGTGTA AAAATTGCT<br>TGTGGTGGTGAAATAGATG |
| 39713824 F 0-29:G>T-29:G>T | TGCAGAAGATTTTAAATGAAACGTTTATAGATAAGCAGAAAGCTACGAA<br>GAATTGAAGTGATACTGACA   |
| 39714019 F 0-42:C>T-42:C>T | TGCAGAATCTCATATAACTCAAGGAACCAAAAAGCCAATAGTTCCATACT<br>CCTACTATTCCAATGTGTAT  |
| 39724502 F 0-51:G>C-51:G>C | TGCAGAGTGTTGGGGTTCGTTTCCGGTGAGGTCTGAGCGTCGTATGTAAC<br>AGAGAACAAGAGATACAAG   |
| 39718406 F 0-59:C>G-59:C>G | TGCAGTGGATTGAAATGTGAGTCTTTGCTTTCATTTCTCACAATTTGGTC<br>GTCACCTCACCTGGGCAA    |
